# Supplementary material for: Toolbox Accelerating Glycomics (TAG): Improving Large-Scale Serum Glycomics and Refinement to Identify SALSA-Modified and Rare Glycans
Source: MDPI journal article supplement (doi:10.3390/ijms232113097), 2022-10-28

# Glycan quantity for each experiment (calibration curve)

1(6):  $m/z=1118.3750$   
(Hex)6  
60000000000000000000

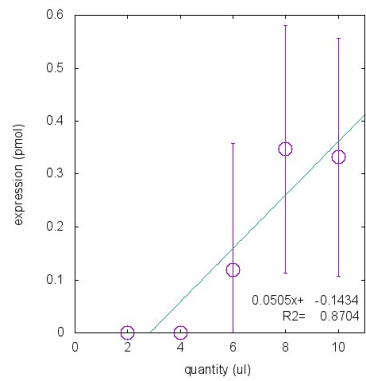

2(18):  $m/z=1362.4808$   
(Hex)2 + (Man)3(GlcNAc)2  
20000000000000000000C

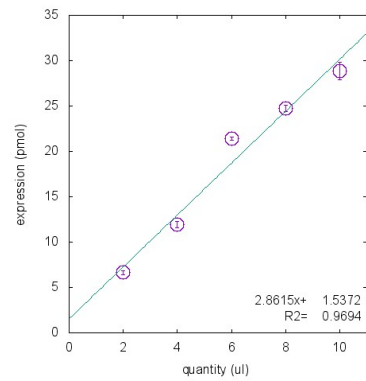

3(19):  $m/z=1524.5336$   
(Hex)3 + (Man)3(GlcNAc)2  
30000000000000000000C

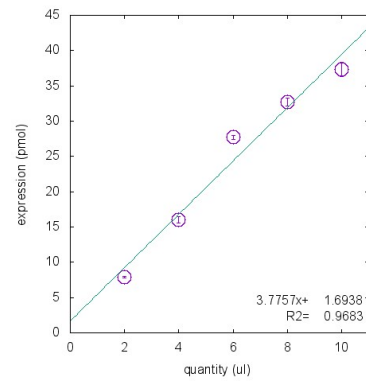

4(20):  $m/z=1686.5864$   
(Hex)4 + (Man)3(GlcNAc)2  
40000000000000000000C

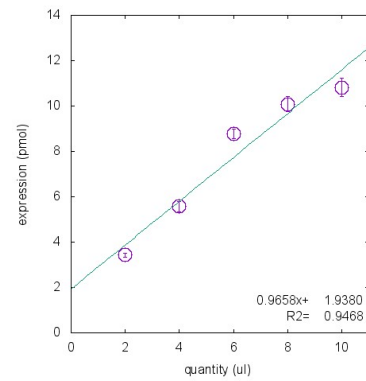

5(21):  $m/z=1848.6392$   
(Hex)5 + (Man)3(GlcNAc)2  
50000000000000000000C

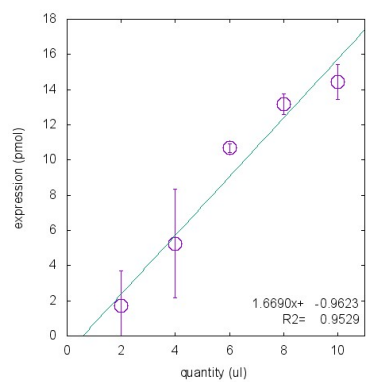

6(22):  $m/z=2010.6920$   
(Hex)6 + (Man)3(GlcNAc)2  
60000000000000000000C

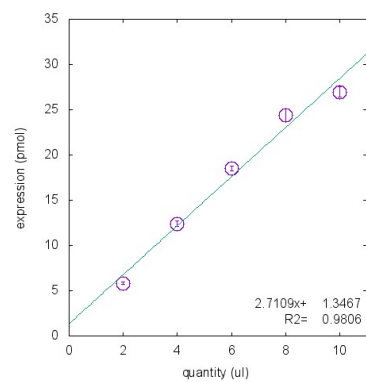

7(27):  $m/z=1444.5338$   
(HexNAc)2 +  
(Man)3(GlcNAc)2  
02000000000000000000C

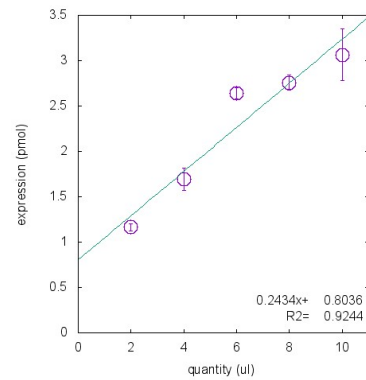

8(28):  $m/z=1647.6131$   
(HexNAc)3 +  
(Man)3(GlcNAc)2  
03000000000000000000C

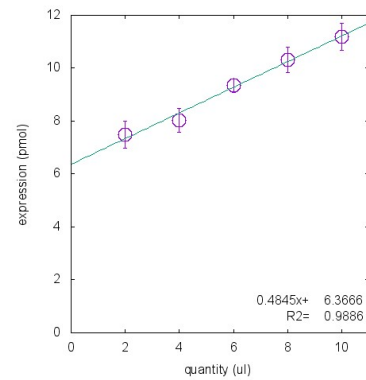

9(31):  $m/z=1403.5073$   
(Hex)1 (HexNAc)1 +  
(Man)3(GlcNAc)2  
11000000000000000000C

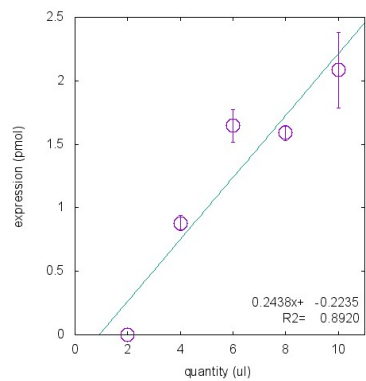

10(32):  $m/z=1606.5866$   
(Hex)1 (HexNAc)2 +  
(Man)3(GlcNAc)2  
12000000000000000000C

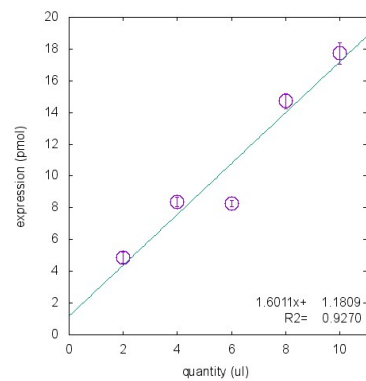

11(33):  $m/z=1809.6659$   
(Hex)1 (HexNAc)3 +  
(Man)3(GlcNAc)2  
13000000000000000000C

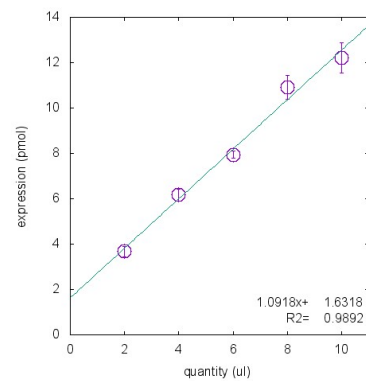

12(36):  $m/z=1565.5601$   
(Hex)2 (HexNAc)1 +  
(Man)3(GlcNAc)2  
21000000000000000000C

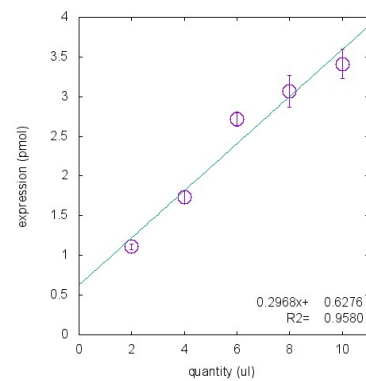

13(37):  $m/z=1768.6394$   
(Hex)2 (HexNAc)2 +  
(Man)3(GlcNAc)2  
22000000000000000000C

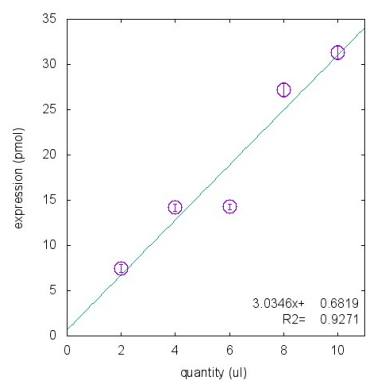

14(38):  $m/z=1971.7187$   
(Hex)2 (HexNAc)3 +  
(Man)3(GlcNAc)2  
23000000000000000000C

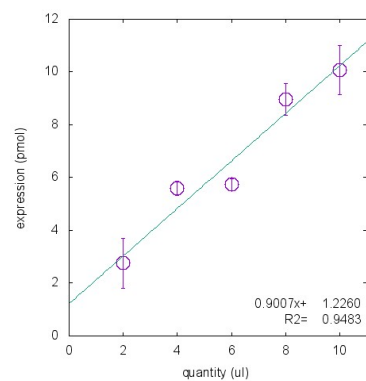

15(41):  $m/z=1727.6129$   
(Hex)3 (HexNAc)1 +  
(Man)3(GlcNAc)2  
31000000000000000000C

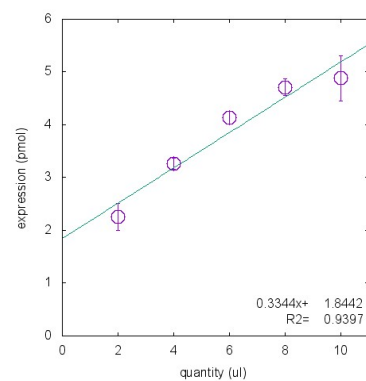

16(62):  $m/z=1590.5917$   
(HexNAc)2 (Fuc)1 +  
(Man)3(GlcNAc)2  
02100000000000000000C

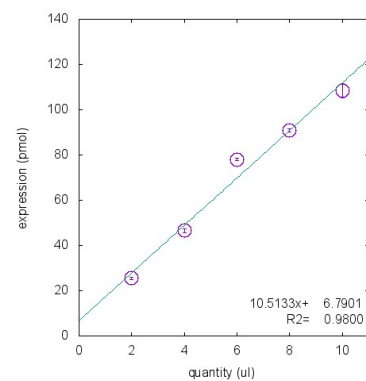

17(63):  $m/z=1793.6710$   
(HexNAc)3 (Fuc)1 +  
(Man)3(GlcNAc)2  
0310000000000000C

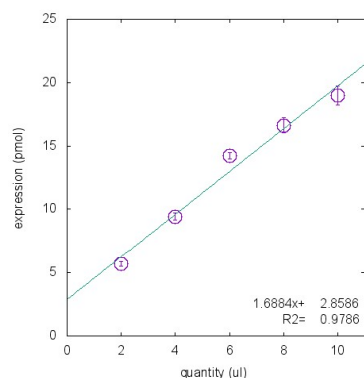

18(67):  $m/z=1752.6445$   
(Hex)1 (HexNAc)2 (Fuc)1 +  
(Man)3(GlcNAc)2  
1210000000000000C

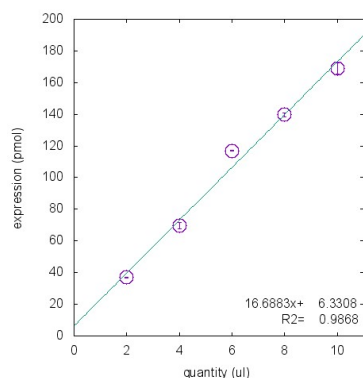

19(68):  $m/z=1955.7238$   
(Hex)1 (HexNAc)3 (Fuc)1 +  
(Man)3(GlcNAc)2  
1310000000000000C

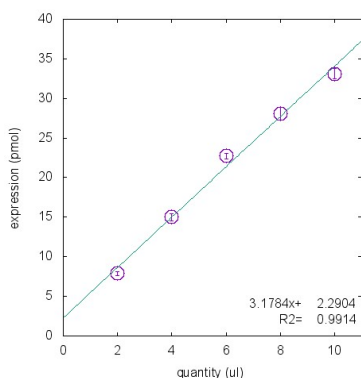

20(72):  $m/z=1914.6973$   
(Hex)2 (HexNAc)2 (Fuc)1 +  
(Man)3(GlcNAc)2  
2210000000000000C

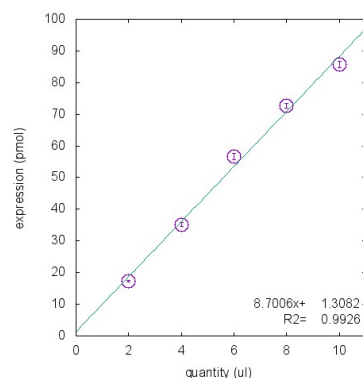

21(141):  $m/z=2327.8394$   
(Hex)4 (HexNAc)1 (Fuc)3 +  
(Man)3(GlcNAc)2  
4130000000000000C

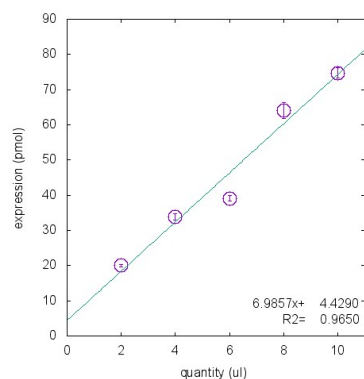

22(147):  $m/z=2692.9715$   
(Hex)5 (HexNAc)2 (Fuc)3 +  
(Man)3(GlcNAc)2  
5230000000000000C

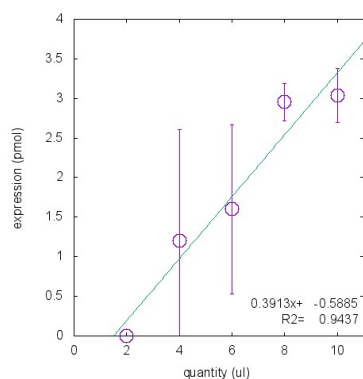

23(148):  $m/z=2896.0508$   
(Hex)5 (HexNAc)3 (Fuc)3 +  
(Man)3(GlcNAc)2  
5330000000000000C

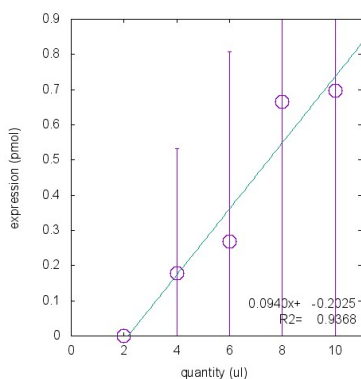

24(165):  $m/z=2432.9195$   
(Hex)1 (HexNAc)5 (GlcA)1  
+ (Man)3(GlcNAc)2  
150000000000010C

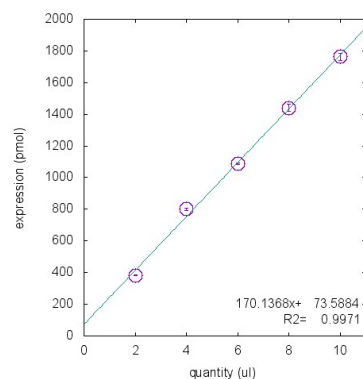

25(193):  $m/z=2010.7660$   
(HexNAc)3 (Fuc)1 (GlcA)1  
+ (Man)3(GlcNAc)2  
031000000000010C

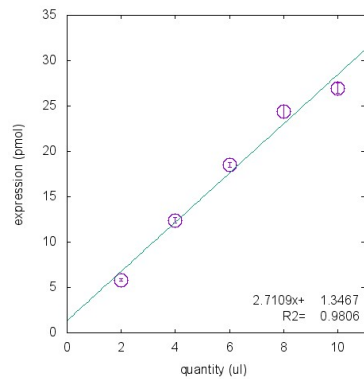

26(200):  $m/z=2578.9774$   
(Hex)1 (HexNAc)5 (Fuc)1  
(GlcA)1 +  
(Man)3(GlcNAc)2  
151000000000010C

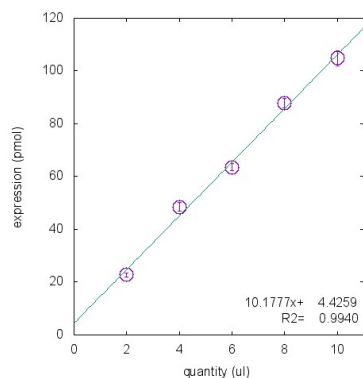

27(216):  $m/z=2414.8714$   
(Hex)5 (HexNAc)1 (Fuc)1  
(GlcA)1 +  
(Man)3(GlcNAc)2  
511000000000010C

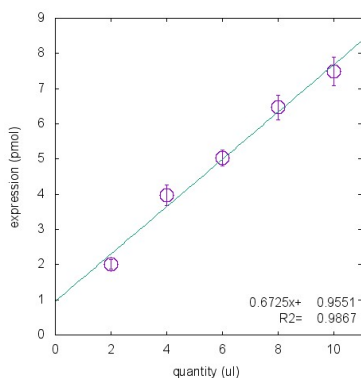

28(237):  $m/z=2439.9030$   
(Hex)3 (HexNAc)2 (Fuc)2  
(GlcA)1 +  
(Man)3(GlcNAc)2  
322000000000010C

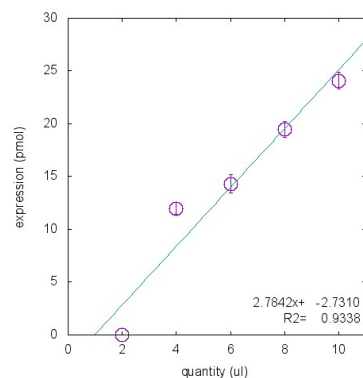

29(286):  $m/z=1573.6128$   
(HexNAc)1 (6NeuAc)1 +  
(Man)3(GlcNAc)2  
0100001000000000C

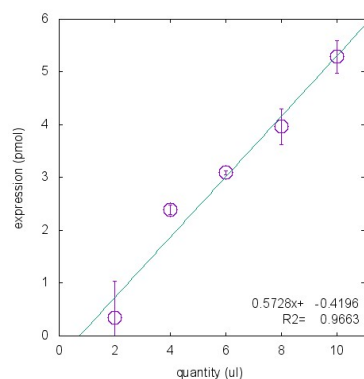

30(296):  $m/z=1735.6656$   
(Hex)1 (HexNAc)1  
(6NeuAc)1 +  
(Man)3(GlcNAc)2  
1100001000000000C

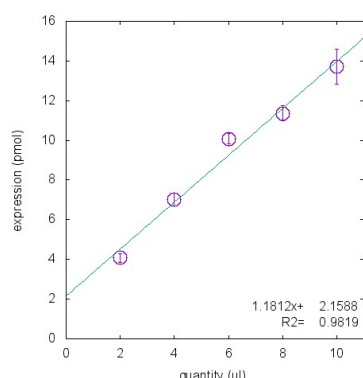

31(297):  $m/z=1707.6343$   
(Hex)1 (HexNAc)1  
(3-8NeuAc)1 +  
(Man)3(GlcNAc)2  
1100010000000000C

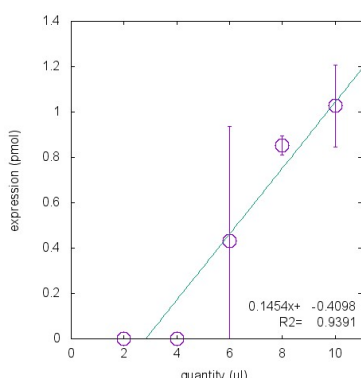

32(298):  $m/z=1938.7449$   
(Hex)1 (HexNAc)2  
(6NeuAc)1 +  
(Man)3(GlcNAc)2  
1200001000000000C

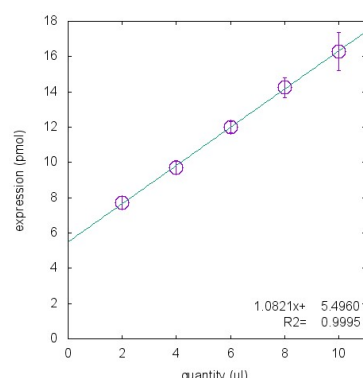

33(300):  $m/z=2141.8242$   
(Hex)1 (HexNAc)3  
(6NeuAc)1 +  
(Man)3(GlcNAc)2  
1300001000000000C

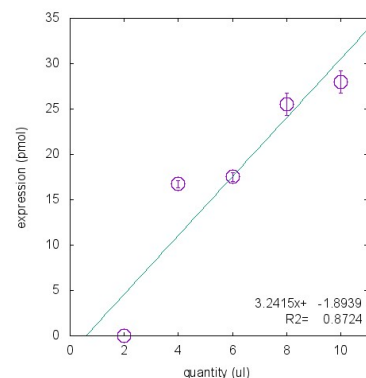

34(306):  $m/z=1897.7184$   
(Hex)2 (HexNAc)1  
(6NeuAc)1 +  
(Man)3(GlcNAc)2  
2100001000000000C

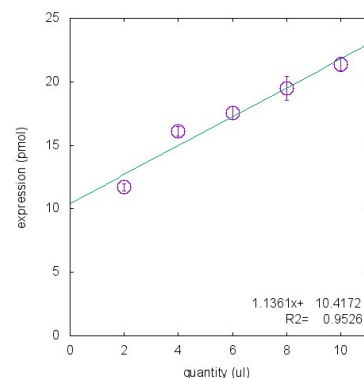

35(307):  $m/z=1869.6871$   
(Hex)2 (HexNAc)1  
(3-8NeuAc)1 +  
(Man)3(GlcNAc)2  
2100010000000000C

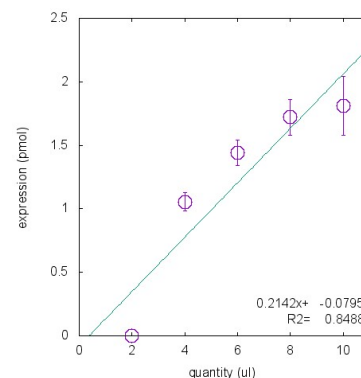

36(308):  $m/z=2100.7977$   
(Hex)2 (HexNAc)2  
(6NeuAc)1 +  
(Man)3(GlcNAc)2  
2200001000000000C

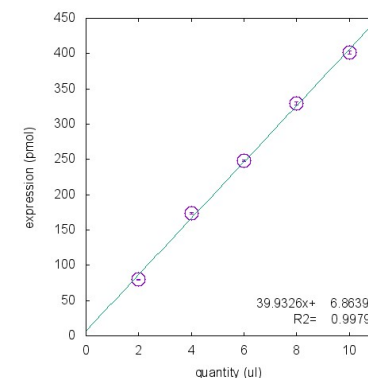

37(309):  $m/z=2072.7664$   
(Hex)2 (HexNAc)2  
(3-8NeuAc)1 +  
(Man)3(GlcNAc)2  
2200010000000000C

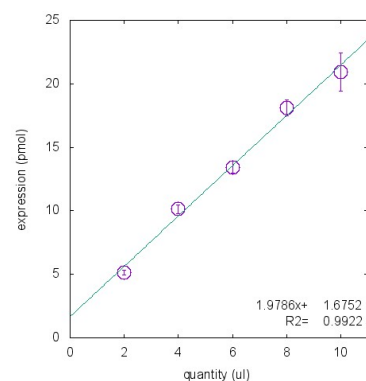

38(310):  $m/z=2303.8770$   
(Hex)2 (HexNAc)3  
(6NeuAc)1 +  
(Man)3(GlcNAc)2  
2300001000000000C

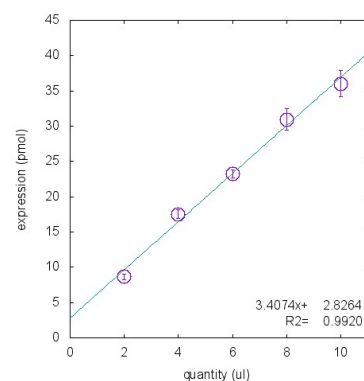

39(316):  $m/z=2059.7712$   
(Hex)3 (HexNAc)1  
(6NeuAc)1 +  
(Man)3(GlcNAc)2  
3100001000000000C

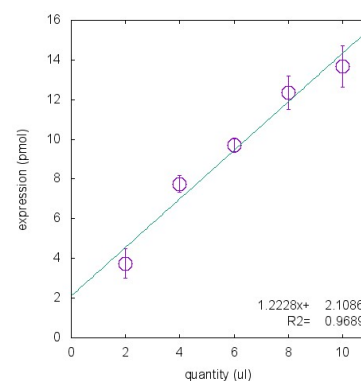

40(317):  $m/z=2031.7399$   
(Hex)3 (HexNAc)1  
(3-8NeuAc)1 +  
(Man)3(GlcNAc)2  
3100010000000000C

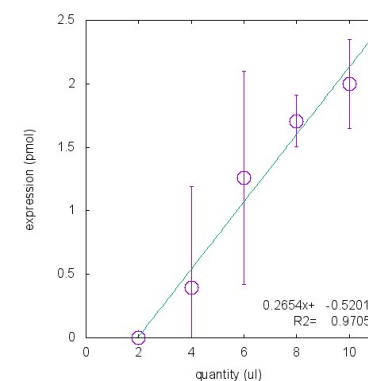

41(320):  $m/z=2465.9298$   
(Hex)3 (HexNAc)3  
(6NeuAc)1 +  
(Man)3(GlcNAc)2  
3300001000000000C

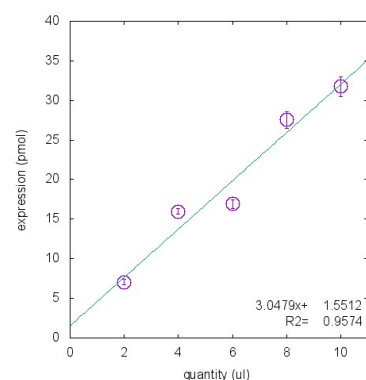

42(332):  $m/z=2831.0619$   
(Hex)4 (HexNAc)4  
(6NeuAc)1 +  
(Man)3(GlcNAc)2  
4400001000000000C

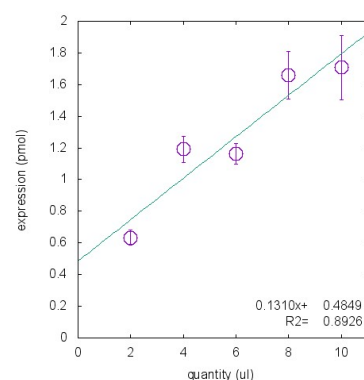

43(336):  $m/z=2383.8768$   
(Hex)5 (HexNAc)1  
(6NeuAc)1 +  
(Man)3(GlcNAc)2  
5100001000000000C

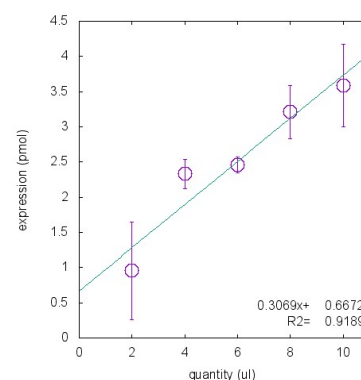

44(368):  $m/z=2084.8028$   
(Hex)1 (HexNAc)2 (Fuc)1  
(6NeuAc)1 +  
(Man)3(GlcNAc)2  
1210001000000000C

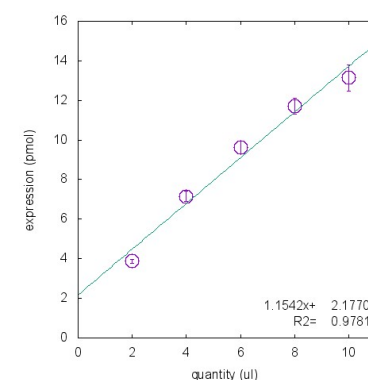

45(370):  $m/z=2287.8821$   
(Hex)1 (HexNAc)3 (Fuc)1  
(6NeuAc)1 +  
(Man)3(GlcNAc)2  
1310001000000000C

46(372):  $m/z=2490.9614$   
(Hex)1 (HexNAc)4 (Fuc)1  
(6NeuAc)1 +  
(Man)3(GlcNAc)2  
1410001000000000C

47(378):  $m/z=2246.8556$   
(Hex)2 (HexNAc)2 (Fuc)1  
(6NeuAc)1 +  
(Man)3(GlcNAc)2  
2210001000000000C

48(379):  $m/z=2218.8243$   
(Hex)2 (HexNAc)2 (Fuc)1  
(3-8NeuAc)1 +  
(Man)3(GlcNAc)2  
2210010000000000C

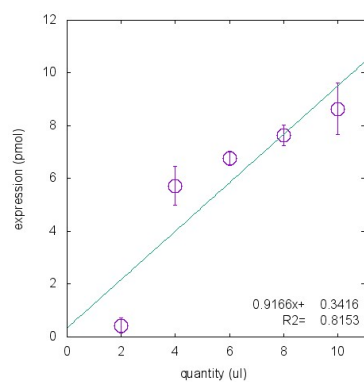

49(390):  $m/z=2611.9877$   
(Hex)3 (HexNAc)3 (Fuc)1  
(6NeuAc)1 +  
(Man)3(GlcNAc)2  
3310001000000000C

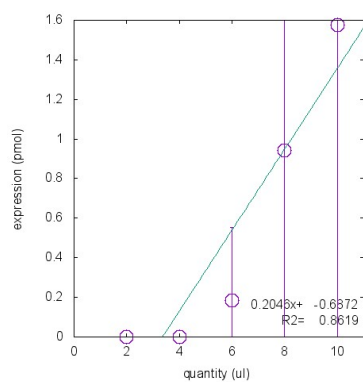

50(397):  $m/z=2339.8506$   
(Hex)4 (HexNAc)1 (Fuc)1  
(3-8NeuAc)1 +  
(Man)3(GlcNAc)2  
4110010000000000C

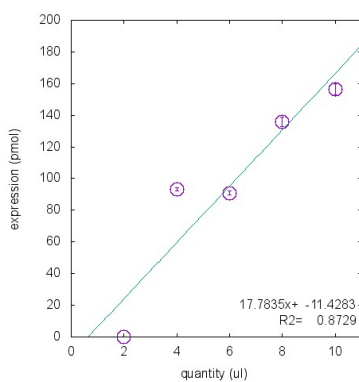

51(428):  $m/z=2474.9665$   
(HexNAc)4 (Fuc)2  
(6NeuAc)1 +  
(Man)3(GlcNAc)2  
0420001000000000C

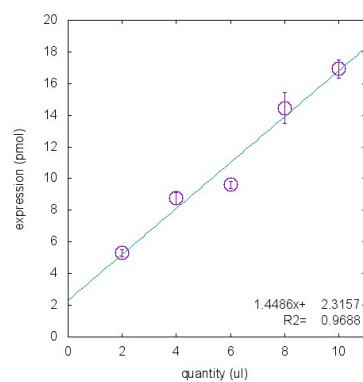

52(500):  $m/z=2742.0507$   
(Hex)2 (HexNAc)3 (Fuc)3  
(6NeuAc)1 +  
(Man)3(GlcNAc)2  
2330001000000000C

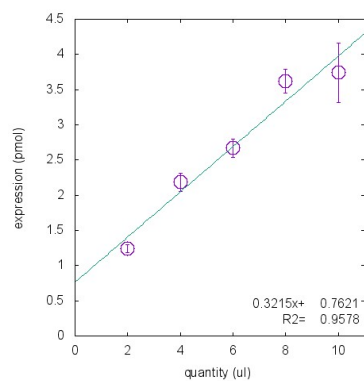

53(529):  $m/z=2997.0985$   
(Hex)5 (HexNAc)2 (Fuc)3  
(3-8NeuAc)1 +  
(Man)3(GlcNAc)2  
5230010000000000C

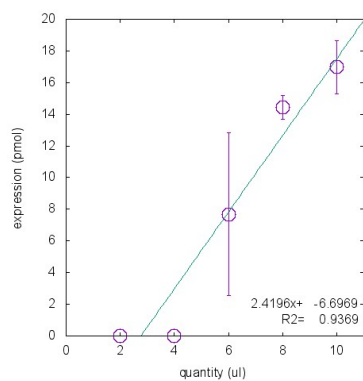

54(554):  $m/z=2317.8927$   
(Hex)2 (HexNAc)2  
(6NeuAc)1 (GlcA)1 +  
(Man)3(GlcNAc)2  
220000100000010C

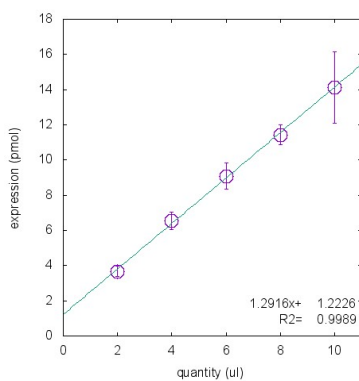

55(561):  $m/z=2899.0993$   
(Hex)2 (HexNAc)5  
(3-8NeuAc)1 (GlcA)1 +  
(Man)3(GlcNAc)2  
250001000000010C

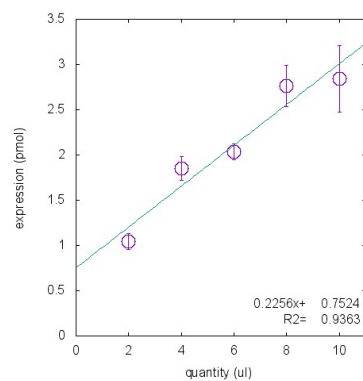

56(609):  $m/z=3045.1572$   
(Hex)2 (HexNAc)5 (Fuc)1  
(3-8NeuAc)1 (GlcA)1 +  
(Man)3(GlcNAc)2  
251001000000010C

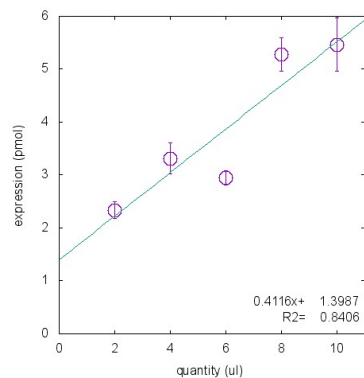

57(736):  $m/z=2677.0618$   
(Hex)1 (HexNAc)4  
(6NeuAc)2 +  
(Man)3(GlcNAc)2  
1400002000000000C

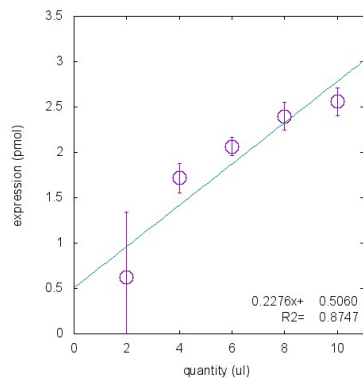

58(742):  $m/z=2432.9560$   
(Hex)2 (HexNAc)2  
(6NeuAc)2 +  
(Man)3(GlcNAc)2  
2200002000000000C

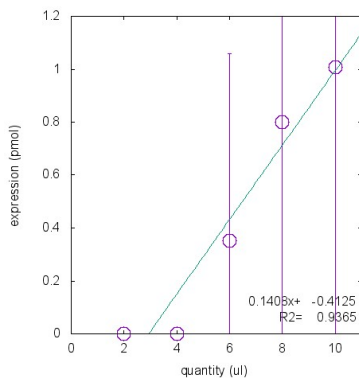

59(743):  $m/z=2404.9247$   
(Hex)2 (HexNAc)2  
(3-8NeuAc)1 (6NeuAc)1 +  
(Man)3(GlcNAc)2  
2200011000000000C

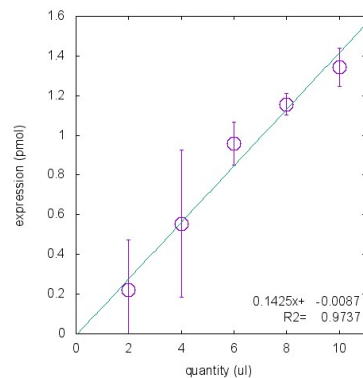

60(744):  $m/z=2376.8934$   
(Hex)2 (HexNAc)2  
(3-8NeuAc)2 +  
(Man)3(GlcNAc)2  
2200020000000000C

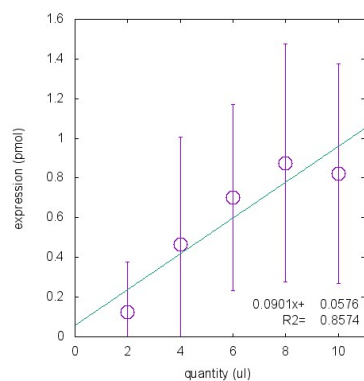

61(745):  $m/z=2636.0353$   
(Hex)2 (HexNAc)3  
(6NeuAc)2 +

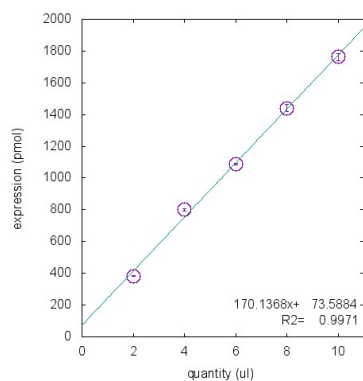

62(755):  $m/z=2566.9775$   
(Hex)3 (HexNAc)2  
(3-8NeuAc)1 (6NeuAc)1 +

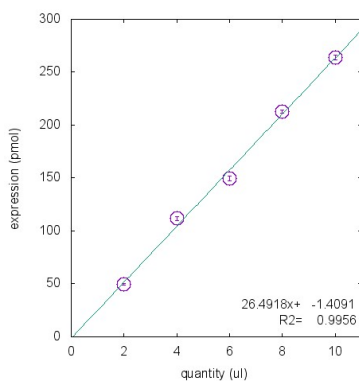

63(757):  $m/z=2798.0881$   
(Hex)3 (HexNAc)3  
(6NeuAc)2 +

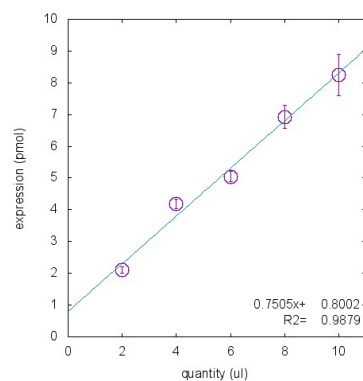

64(758):  $m/z=2770.0568$   
(Hex)3 (HexNAc)3  
(3-8NeuAc)1 (6NeuAc)1 +

(Man)3(GlcNAc)2  
2300002000000000C

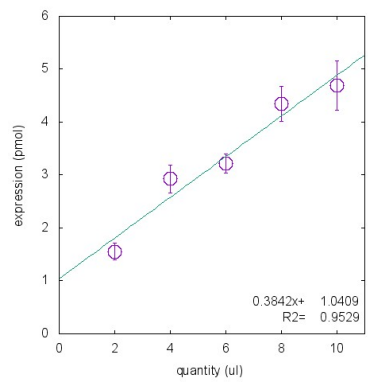

(Man)3(GlcNAc)2  
3200011000000000C

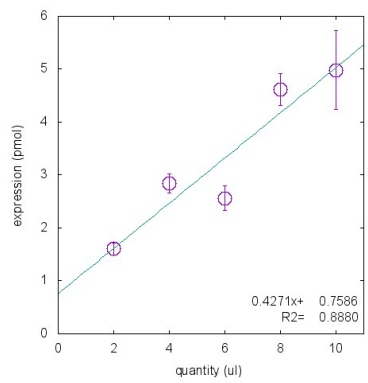

(Man)3(GlcNAc)2  
3300002000000000C

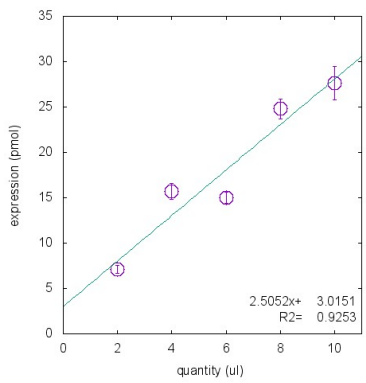

(Man)3(GlcNAc)2  
3300011000000000C

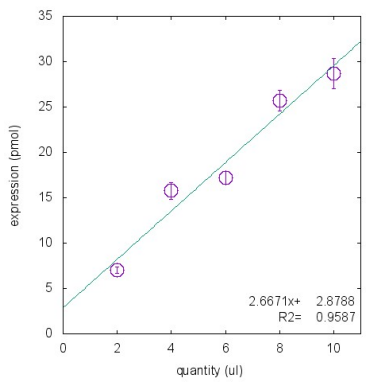

65(759):  $m/z$ = 2742.0255  
(Hex)3 (HexNAc)3  
(3-8NeuAc)2 +  
(Man)3(GlcNAc)2  
3300020000000000C

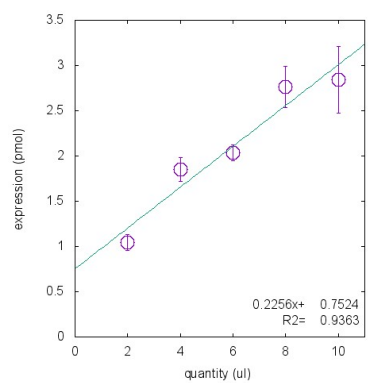

66(773):  $m/z$ = 3135.1889  
(Hex)4 (HexNAc)4  
(3-8NeuAc)1 (6NeuAc)1 +  
(Man)3(GlcNAc)2  
4400011000000000C

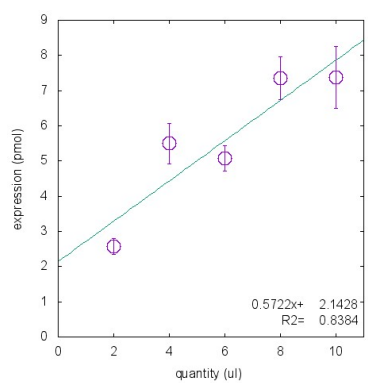

67(814):  $m/z$ = 2579.0139  
(Hex)2 (HexNAc)2 (Fuc)1  
(6NeuAc)2 +  
(Man)3(GlcNAc)2  
2210002000000000C

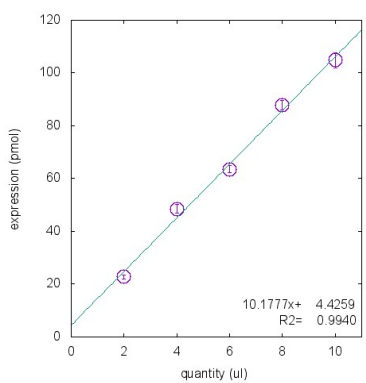

68(815):  $m/z$ = 2550.9826  
(Hex)2 (HexNAc)2 (Fuc)1  
(3-8NeuAc)1 (6NeuAc)1 +  
(Man)3(GlcNAc)2  
2210011000000000C

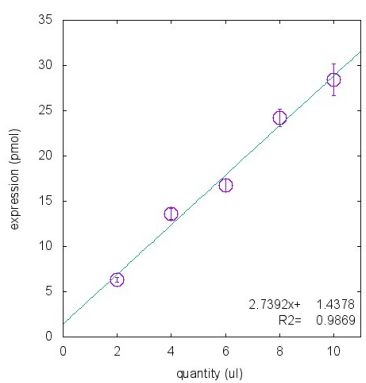

69(816):  $m/z$ = 2522.9513  
(Hex)2 (HexNAc)2 (Fuc)1  
(3-8NeuAc)2 +  
(Man)3(GlcNAc)2  
2210020000000000C

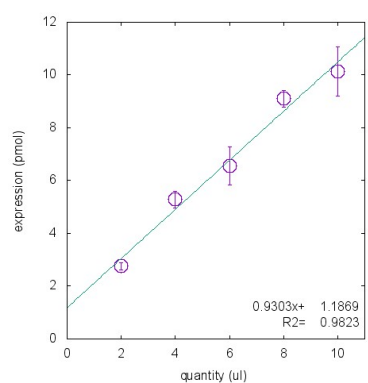

70(817):  $m/z$ = 2782.0932  
(Hex)2 (HexNAc)3 (Fuc)1  
(6NeuAc)2 +  
(Man)3(GlcNAc)2  
2310002000000000C

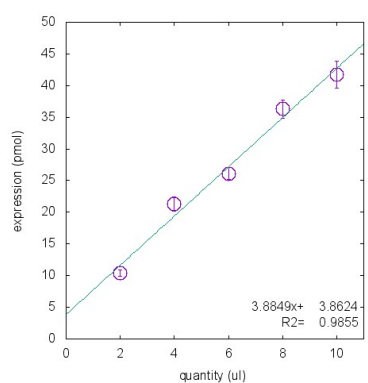

71(818):  $m/z$ = 2754.0619  
(Hex)2 (HexNAc)3 (Fuc)1  
(3-8NeuAc)1 (6NeuAc)1 +  
(Man)3(GlcNAc)2  
2310011000000000C

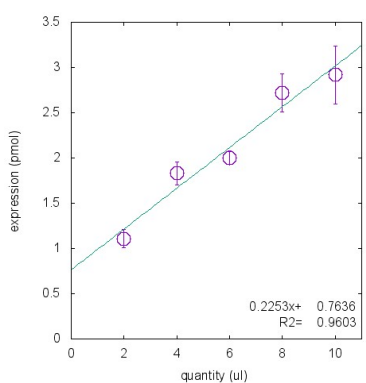

72(829):  $m/z$ = 2944.1460  
(Hex)3 (HexNAc)3 (Fuc)1  
(6NeuAc)2 +  
(Man)3(GlcNAc)2  
3310002000000000C

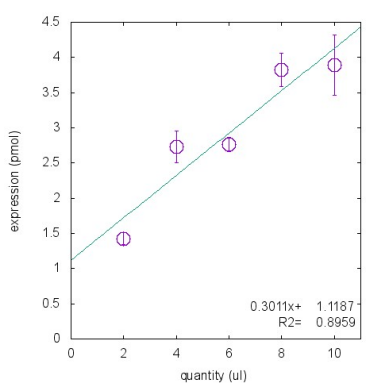

73(830):  $m/z$ = 2916.1147  
(Hex)3 (HexNAc)3 (Fuc)1  
(3-8NeuAc)1 (6NeuAc)1 +  
(Man)3(GlcNAc)2  
3310011000000000C

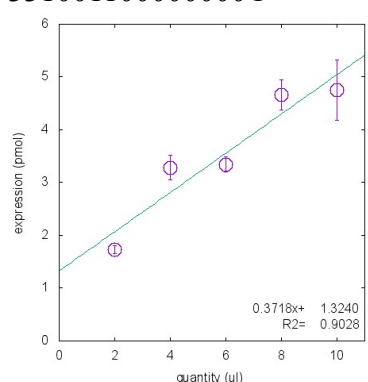

74(894):  $m/z$ = 2831.0620  
(Hex)3 (HexNAc)2 (Fuc)2  
(3-8NeuAc)2 +  
(Man)3(GlcNAc)2  
3220020000000000C

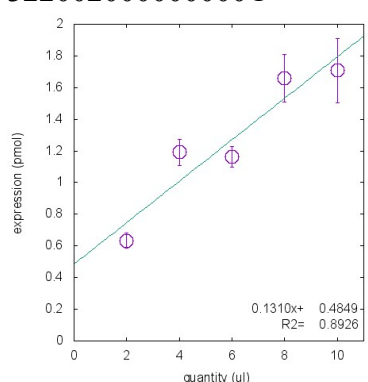

75(949):  $m/z$ = 3074.2090  
(Hex)2 (HexNAc)3 (Fuc)3  
(6NeuAc)2 +  
(Man)3(GlcNAc)2  
2330002000000000C

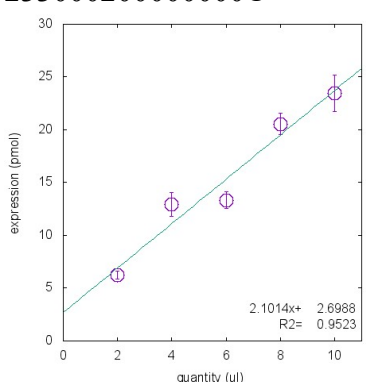

76(1198):  $m/z$ = 3130.2464  
(Hex)3 (HexNAc)3  
(6NeuAc)3 +  
(Man)3(GlcNAc)2  
3300003000000000C

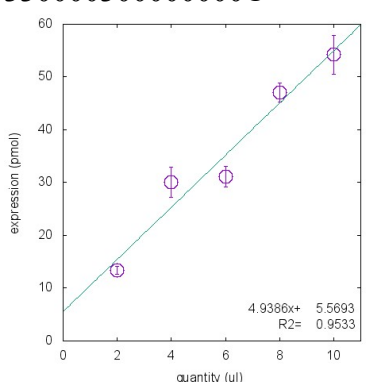



77(1199):  $m/z=3102.2151$   
(Hex)3 (HexNAc)3  
(3-8NeuAc)1 (6NeuAc)2 +  
(Man)3(GlcNAc)2  
330001200000000C

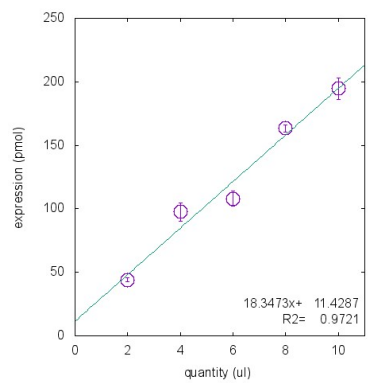

78(1200):  $m/z=3074.1838$   
(Hex)3 (HexNAc)3  
(3-8NeuAc)2 (6NeuAc)1 +  
(Man)3(GlcNAc)2  
330002100000000C

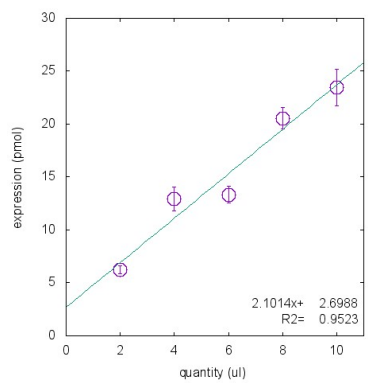

79(1259):  $m/z=3248.2730$   
(Hex)3 (HexNAc)3 (Fuc)1  
(3-8NeuAc)1 (6NeuAc)2 +  
(Man)3(GlcNAc)2  
331001200000000C

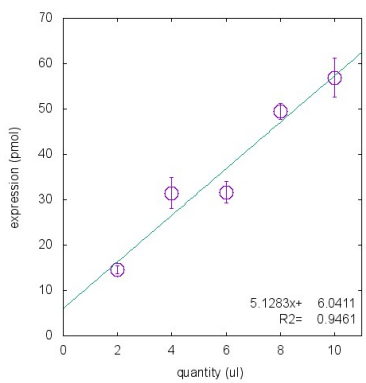

80(1260):  $m/z=3220.2417$   
(Hex)3 (HexNAc)3 (Fuc)1  
(3-8NeuAc)2 (6NeuAc)1 +  
(Man)3(GlcNAc)2  
331002100000000C

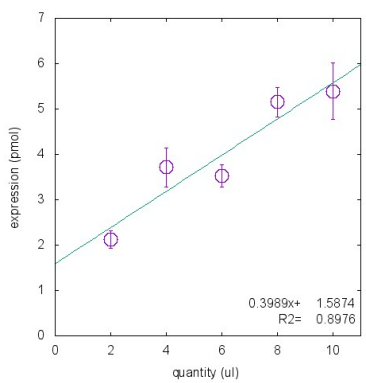

81(1261):  $m/z=3192.2104$   
(Hex)3 (HexNAc)3 (Fuc)1  
(3-8NeuAc)3 +  
(Man)3(GlcNAc)2  
331003000000000C

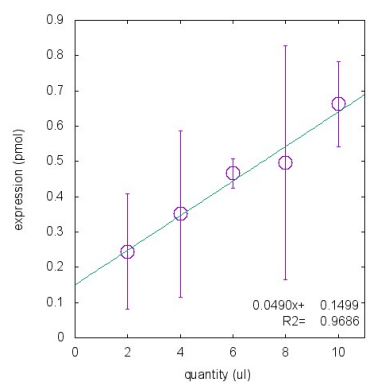

Supplement: s1 [file s1]
