# Supplementary material for: Toolbox Accelerating Glycomics (TAG): Improving Large-Scale Serum Glycomics and Refinement to Identify SALSA-Modified and Rare Glycans
Source: MDPI journal article supplement (doi:10.3390/ijms232113097), 2022-10-28
Supplement: s1 [file s1]

**Table S1.** Complete list of glycan residues in TAG. In parentheses, we described the modification method of carboxylic acid of sialic acid.

|    | Name             | Description                                              |
|----|------------------|----------------------------------------------------------|
| 1  | Hex              | Hexose                                                   |
| 2  | HexNAc           | <i>N</i> -acetyl hexose                                  |
| 3  | Fuc              | Fucose                                                   |
| 4  | NeuAc            | <i>N</i> -acetylneuraminic acid (methylesterification)   |
| 5  | NeuGc            | <i>N</i> -glycolylneuraminic acid (methylesterification) |
| 6  | 3-8NeuAc         | $\alpha$ 2,3- or $\alpha$ 2,8-linkage of NeuAc (SALSA)   |
| 7  | 6NeuAc           | $\alpha$ 2,6-linkage of NeuAc (SALSA)                    |
| 8  | 3-8NeuGc         | $\alpha$ 2,3- or $\alpha$ 2,8-linkage of NeuGc (SALSA)   |
| 9  | 6NeuGc           | $\alpha$ 2,6-linkage of NeuGc (SALSA)                    |
| 10 | KDN              | 2-keto-3-deoxynonoic acid (methylesterification)         |
| 11 | HSO <sub>3</sub> | Sulfation modification                                   |
| 12 | Lactone          | Lactonization modification of sialic acids               |
| 13 | Ac               | Acetylation modification                                 |
| 14 | GlcA             | Glucuronic acid (isopropylamine amination)               |
| 15 | P                | Phosphorylation modification                             |
