# Supplementary material for: Toolbox Accelerating Glycomics (TAG): Improving Large-Scale Serum Glycomics and Refinement to Identify SALSA-Modified and Rare Glycans
Source: Int J Mol Sci. 2022 Oct 28;23(21):13097. doi: 10.3390/ijms232113097 (PMC9656093; doi:10.3390/ijms232113097)
Supplement: Supplementary file 1 [file ijms-23-13097-s001.zip]

Archive with 8 entries (8 files):
- Figure S1 Biosynthetic pathway for trimming of high-mannose glycans and the synthesis of hybrid glycans.pptx
- Figure S2 Calibration curves in the serum analysis.pdf
- Table S1 Complete list of glycan residues in TAG.pdf
- Table S2 All major output files from TAG Expression.pdf
- Table S3a Glycan list used in this study.xlsx
- Table S3b Glycan type description.xlsx
- Table S4 summary file of human serum glycomics for carlibration line with R2 is larger than 0.8.xlsx
- Table S5 summary file of human serum glycomics.xlsx
