# Supplementary material for: Toolbox Accelerating Glycomics (TAG): Improving Large-Scale Serum Glycomics and Refinement to Identify SALSA-Modified and Rare Glycans
Source: Int J Mol Sci. 2022 Oct 28;23(21):13097. doi: 10.3390/ijms232113097 (PMC9656093; doi:10.3390/ijms232113097)
Supplement: Supplementary file 1 [file ijms-23-13097-s001.zip › Table S3a Glycan list used in this study.xlsx]

## Sheet: Table S2. glycan list N_list_BO
Table S3a Glycan list used in this study
composition	mass	glycan type
N
IS A2GN1(a26)	2229.88
(Hex)1	308.111	PM
(Hex)2	470.164	PM
(Hex)3	632.217	PM
(Hex)4	794.269	PM
(Hex)5	956.322	PM
(Hex)6	1118.38	PM
(Hex)7	1280.43	PM
(Hex)8	1442.48	PM
(Hex)1 (HexNAc)2	714.27	PM
(Hex)2 (HexNAc)2	876.322	PM
(Hex)3 (HexNAc)2	1038.38	PM
(Hex)4 (HexNAc)2	1200.43	PM
(Hex)1 (HexNAc)2 (Fuc)1	860.327	PM_F
(Hex)2 (HexNAc)2 (Fuc)1	1022.38	PM_F
(Hex)3 (HexNAc)2 (Fuc)1	1184.43	PM_F
(Hex)4 (HexNAc)2 (Fuc)1	1346.49	PM_F
(Hex)5 (HexNAc)2 (Fuc)1	1508.54	PM_F
(Hex)2 + (Man)3(GlcNAc)2	1362.48	HM
(Hex)3 + (Man)3(GlcNAc)2	1524.53	HM
(Hex)4 + (Man)3(GlcNAc)2	1686.59	HM
(Hex)5 + (Man)3(GlcNAc)2	1848.64	HM
(Hex)6 + (Man)3(GlcNAc)2	2010.69	HM
(Hex)7 + (Man)3(GlcNAc)2	2172.74	HM_G
(Hex)8 + (Man)3(GlcNAc)2	2334.8	HM_G
(Hex)9 + (Man)3(GlcNAc)2	2496.85	HM_G
(HexNAc)1 + (Man)3(GlcNAc)2	1241.45	1_n
(HexNAc)2 + (Man)3(GlcNAc)2	1444.53	2_n
(HexNAc)3 + (Man)3(GlcNAc)2	1647.61	3bL_n
(HexNAc)4 + (Man)3(GlcNAc)2	1850.69	4bL_n
(HexNAc)5 + (Man)3(GlcNAc)2	2053.77	5n
(Hex)1 (HexNAc)1 + (Man)3(GlcNAc)2	1403.51	1_n
(Hex)1 (HexNAc)2 + (Man)3(GlcNAc)2	1606.59	2_n
(Hex)1 (HexNAc)3 + (Man)3(GlcNAc)2	1809.67	3bL_n
(Hex)1 (HexNAc)4 + (Man)3(GlcNAc)2	2012.75	4bL_n
(Hex)1 (HexNAc)5 + (Man)3(GlcNAc)2	2215.82	5n
(Hex)2 (HexNAc)1 + (Man)3(GlcNAc)2	1565.56	Hy_n
(Hex)2 (HexNAc)2 + (Man)3(GlcNAc)2	1768.64	2_n
(Hex)2 (HexNAc)3 + (Man)3(GlcNAc)2	1971.72	3b_n
(Hex)2 (HexNAc)4 + (Man)3(GlcNAc)2	2174.8	4bL_n
(Hex)2 (HexNAc)5 + (Man)3(GlcNAc)2	2377.88	5n
(Hex)3 (HexNAc)1 + (Man)3(GlcNAc)2	1727.61	Hy_n
(Hex)3 (HexNAc)2 + (Man)3(GlcNAc)2	1930.69	Hy_n
(Hex)3 (HexNAc)3 + (Man)3(GlcNAc)2	2133.77	3_n
(Hex)3 (HexNAc)4 + (Man)3(GlcNAc)2	2336.85	4b_n
(Hex)3 (HexNAc)5 + (Man)3(GlcNAc)2	2539.93	5n
(Hex)4 (HexNAc)1 + (Man)3(GlcNAc)2	1889.67	Hy_n
(Hex)4 (HexNAc)2 + (Man)3(GlcNAc)2	2092.74	Hy_n
(Hex)4 (HexNAc)3 + (Man)3(GlcNAc)2	2295.82	Hy_n
(Hex)4 (HexNAc)4 + (Man)3(GlcNAc)2	2498.9	4_n
(Hex)4 (HexNAc)5 + (Man)3(GlcNAc)2	2701.98	5n
(Hex)5 (HexNAc)1 + (Man)3(GlcNAc)2	2051.72	Hy_n
(Hex)5 (HexNAc)2 + (Man)3(GlcNAc)2	2254.8	Hy_n
(Hex)5 (HexNAc)3 + (Man)3(GlcNAc)2	2457.88	Hy_n
(Hex)5 (HexNAc)4 + (Man)3(GlcNAc)2	2660.96	Hy_n
(Hex)5 (HexNAc)5 + (Man)3(GlcNAc)2	2864.04	5n
(Hex)6 (HexNAc)1 + (Man)3(GlcNAc)2	2213.77	Hy_n
(Hex)6 (HexNAc)2 + (Man)3(GlcNAc)2	2416.85	Hy_n
(Hex)6 (HexNAc)3 + (Man)3(GlcNAc)2	2619.93	Hy_n
(Hex)6 (HexNAc)4 + (Man)3(GlcNAc)2	2823.01	Hy_n
(Hex)6 (HexNAc)5 + (Man)3(GlcNAc)2	3026.09	Hy_n
(HexNAc)1 (Fuc)1 + (Man)3(GlcNAc)2	1387.51	1_n_F
(HexNAc)2 (Fuc)1 + (Man)3(GlcNAc)2	1590.59	2_n_F
(HexNAc)3 (Fuc)1 + (Man)3(GlcNAc)2	1793.67	3bL_n_F
(HexNAc)4 (Fuc)1 + (Man)3(GlcNAc)2	1996.75	4bL_n_F
(HexNAc)5 (Fuc)1 + (Man)3(GlcNAc)2	2199.83	5n
(Hex)1 (HexNAc)1 (Fuc)1 + (Man)3(GlcNAc)2	1549.57	1_n_F
(Hex)1 (HexNAc)2 (Fuc)1 + (Man)3(GlcNAc)2	1752.64	2_n_F
(Hex)1 (HexNAc)3 (Fuc)1 + (Man)3(GlcNAc)2	1955.72	3bL_n_F
(Hex)1 (HexNAc)4 (Fuc)1 + (Man)3(GlcNAc)2	2158.8	4bL_n_F
(Hex)1 (HexNAc)5 (Fuc)1 + (Man)3(GlcNAc)2	2361.88	5n
(Hex)2 (HexNAc)1 (Fuc)1 + (Man)3(GlcNAc)2	1711.62	Hy_n_F
(Hex)2 (HexNAc)2 (Fuc)1 + (Man)3(GlcNAc)2	1914.7	2_n_F
(Hex)2 (HexNAc)3 (Fuc)1 + (Man)3(GlcNAc)2	2117.78	3b_n_F
(Hex)2 (HexNAc)4 (Fuc)1 + (Man)3(GlcNAc)2	2320.86	4bL_n_F
(Hex)2 (HexNAc)5 (Fuc)1 + (Man)3(GlcNAc)2	2523.94	5n
(Hex)3 (HexNAc)1 (Fuc)1 + (Man)3(GlcNAc)2	1873.67	Hy_n_F
(Hex)3 (HexNAc)2 (Fuc)1 + (Man)3(GlcNAc)2	2076.75	Hy_n_F
(Hex)3 (HexNAc)3 (Fuc)1 + (Man)3(GlcNAc)2	2279.83	3_n_F
(Hex)3 (HexNAc)4 (Fuc)1 + (Man)3(GlcNAc)2	2482.91	4b_n_F
(Hex)3 (HexNAc)5 (Fuc)1 + (Man)3(GlcNAc)2	2685.99	5n
(Hex)4 (HexNAc)1 (Fuc)1 + (Man)3(GlcNAc)2	2035.72	Hy_n_F
(Hex)4 (HexNAc)2 (Fuc)1 + (Man)3(GlcNAc)2	2238.8	Hy_n_F
(Hex)4 (HexNAc)3 (Fuc)1 + (Man)3(GlcNAc)2	2441.88	Hy_n_F
(Hex)4 (HexNAc)4 (Fuc)1 + (Man)3(GlcNAc)2	2644.96	4_n_F
(Hex)4 (HexNAc)5 (Fuc)1 + (Man)3(GlcNAc)2	2848.04	5n
(Hex)5 (HexNAc)1 (Fuc)1 + (Man)3(GlcNAc)2	2197.78	Hy_n_F
(Hex)5 (HexNAc)2 (Fuc)1 + (Man)3(GlcNAc)2	2400.86	Hy_n_F
(Hex)5 (HexNAc)3 (Fuc)1 + (Man)3(GlcNAc)2	2603.93	Hy_n_F
(Hex)5 (HexNAc)4 (Fuc)1 + (Man)3(GlcNAc)2	2807.01	Hy_n_F
(Hex)5 (HexNAc)5 (Fuc)1 + (Man)3(GlcNAc)2	3010.09	5n
(Hex)6 (HexNAc)1 (Fuc)1 + (Man)3(GlcNAc)2	2359.83	Hy_n_F
(Hex)6 (HexNAc)2 (Fuc)1 + (Man)3(GlcNAc)2	2562.91	Hy_n_F
(Hex)6 (HexNAc)3 (Fuc)1 + (Man)3(GlcNAc)2	2765.99	Hy_n_F
(Hex)6 (HexNAc)4 (Fuc)1 + (Man)3(GlcNAc)2	2969.07	Hy_n_F
(Hex)6 (HexNAc)5 (Fuc)1 + (Man)3(GlcNAc)2	3172.15	Hy_n_F
(HexNAc)3 (Fuc)2 + (Man)3(GlcNAc)2	1939.73	3bL_n_F
(HexNAc)4 (Fuc)2 + (Man)3(GlcNAc)2	2142.81	4bL_n_F
(HexNAc)5 (Fuc)2 + (Man)3(GlcNAc)2	2345.89	5n
(Hex)1 (HexNAc)3 (Fuc)2 + (Man)3(GlcNAc)2	2101.78	3bL_n_F
(Hex)1 (HexNAc)4 (Fuc)2 + (Man)3(GlcNAc)2	2304.86	4bL_n_F
(Hex)1 (HexNAc)5 (Fuc)2 + (Man)3(GlcNAc)2	2507.94	5n
(Hex)2 (HexNAc)1 (Fuc)2 + (Man)3(GlcNAc)2	1857.68	Hy_n_F
(Hex)2 (HexNAc)3 (Fuc)2 + (Man)3(GlcNAc)2	2263.83	3b_n_F
(Hex)2 (HexNAc)4 (Fuc)2 + (Man)3(GlcNAc)2	2466.91	4bL_n_F
(Hex)2 (HexNAc)5 (Fuc)2 + (Man)3(GlcNAc)2	2669.99	5n
(Hex)3 (HexNAc)1 (Fuc)2 + (Man)3(GlcNAc)2	2019.73	Hy_n_F
(Hex)3 (HexNAc)2 (Fuc)2 + (Man)3(GlcNAc)2	2222.81	Hy_n_F
(Hex)3 (HexNAc)3 (Fuc)2 + (Man)3(GlcNAc)2	2425.89	3_n_F
(Hex)3 (HexNAc)4 (Fuc)2 + (Man)3(GlcNAc)2	2628.97	4b_n_F
(Hex)3 (HexNAc)5 (Fuc)2 + (Man)3(GlcNAc)2	2832.05	5n
(Hex)4 (HexNAc)1 (Fuc)2 + (Man)3(GlcNAc)2	2181.78	Hy_n_F
(Hex)4 (HexNAc)2 (Fuc)2 + (Man)3(GlcNAc)2	2384.86	Hy_n_F
(Hex)4 (HexNAc)3 (Fuc)2 + (Man)3(GlcNAc)2	2587.94	Hy_n_F
(Hex)4 (HexNAc)4 (Fuc)2 + (Man)3(GlcNAc)2	2791.02	4_n_F
(Hex)4 (HexNAc)5 (Fuc)2 + (Man)3(GlcNAc)2	2994.1	5n
(Hex)5 (HexNAc)1 (Fuc)2 + (Man)3(GlcNAc)2	2343.83	Hy_n_F
(Hex)5 (HexNAc)2 (Fuc)2 + (Man)3(GlcNAc)2	2546.91	Hy_n_F
(Hex)5 (HexNAc)3 (Fuc)2 + (Man)3(GlcNAc)2	2749.99	Hy_n_F
(Hex)5 (HexNAc)4 (Fuc)2 + (Man)3(GlcNAc)2	2953.07	Hy_n_F
(Hex)5 (HexNAc)5 (Fuc)2 + (Man)3(GlcNAc)2	3156.15	5n
(Hex)6 (HexNAc)1 (Fuc)2 + (Man)3(GlcNAc)2	2505.89	Hy_n_F
(Hex)6 (HexNAc)2 (Fuc)2 + (Man)3(GlcNAc)2	2708.97	Hy_n_F
(Hex)6 (HexNAc)3 (Fuc)2 + (Man)3(GlcNAc)2	2912.05	Hy_n_F
(Hex)6 (HexNAc)4 (Fuc)2 + (Man)3(GlcNAc)2	3115.12	Hy_n_F
(Hex)6 (HexNAc)5 (Fuc)2 + (Man)3(GlcNAc)2	3318.2	Hy_n_F
(HexNAc)3 (Fuc)3 + (Man)3(GlcNAc)2	2085.79	3bL_n_F
(HexNAc)4 (Fuc)3 + (Man)3(GlcNAc)2	2288.87	4bL_n_F
(HexNAc)5 (Fuc)3 + (Man)3(GlcNAc)2	2491.95	5n
(Hex)1 (HexNAc)3 (Fuc)3 + (Man)3(GlcNAc)2	2247.84	3bL_n_F
(Hex)1 (HexNAc)4 (Fuc)3 + (Man)3(GlcNAc)2	2450.92	4bL_n_F
(Hex)1 (HexNAc)5 (Fuc)3 + (Man)3(GlcNAc)2	2654	5n
(Hex)2 (HexNAc)1 (Fuc)3 + (Man)3(GlcNAc)2	2003.73	Hy_n_F
(Hex)2 (HexNAc)3 (Fuc)3 + (Man)3(GlcNAc)2	2409.89	3b_n_F
(Hex)2 (HexNAc)4 (Fuc)3 + (Man)3(GlcNAc)2	2612.97	4bL_n_F
(Hex)2 (HexNAc)5 (Fuc)3 + (Man)3(GlcNAc)2	2816.05	5n
(Hex)3 (HexNAc)1 (Fuc)3 + (Man)3(GlcNAc)2	2165.79	Hy_n_F
(Hex)3 (HexNAc)2 (Fuc)3 + (Man)3(GlcNAc)2	2368.87	Hy_n_F
(Hex)3 (HexNAc)3 (Fuc)3 + (Man)3(GlcNAc)2	2571.95	3_n_F
(Hex)3 (HexNAc)4 (Fuc)3 + (Man)3(GlcNAc)2	2775.02	4b_n_F
(Hex)3 (HexNAc)5 (Fuc)3 + (Man)3(GlcNAc)2	2978.1	5n
(Hex)4 (HexNAc)1 (Fuc)3 + (Man)3(GlcNAc)2	2327.84	Hy_n_F
(Hex)4 (HexNAc)2 (Fuc)3 + (Man)3(GlcNAc)2	2530.92	Hy_n_F
(Hex)4 (HexNAc)3 (Fuc)3 + (Man)3(GlcNAc)2	2734	Hy_n_F
(Hex)4 (HexNAc)4 (Fuc)3 + (Man)3(GlcNAc)2	2937.08	4_n_F
(Hex)4 (HexNAc)5 (Fuc)3 + (Man)3(GlcNAc)2	3140.16	5n
(Hex)5 (HexNAc)1 (Fuc)3 + (Man)3(GlcNAc)2	2489.89	Hy_n_F
(Hex)5 (HexNAc)2 (Fuc)3 + (Man)3(GlcNAc)2	2692.97	Hy_n_F
(Hex)5 (HexNAc)3 (Fuc)3 + (Man)3(GlcNAc)2	2896.05	Hy_n_F
(Hex)5 (HexNAc)4 (Fuc)3 + (Man)3(GlcNAc)2	3099.13	Hy_n_F
(Hex)5 (HexNAc)5 (Fuc)3 + (Man)3(GlcNAc)2	3302.21	5n
(Hex)6 (HexNAc)1 (Fuc)3 + (Man)3(GlcNAc)2	2651.95	Hy_n_F
(Hex)6 (HexNAc)2 (Fuc)3 + (Man)3(GlcNAc)2	2855.02	Hy_n_F
(Hex)6 (HexNAc)3 (Fuc)3 + (Man)3(GlcNAc)2	3058.1	Hy_n_F
(Hex)6 (HexNAc)4 (Fuc)3 + (Man)3(GlcNAc)2	3261.18	Hy_n_F
(Hex)6 (HexNAc)5 (Fuc)3 + (Man)3(GlcNAc)2	3464.26	Hy_n_F
(HexNAc)1 (GlcA)1 + (Man)3(GlcNAc)2	1458.55	1_a
(HexNAc)2 (GlcA)1 + (Man)3(GlcNAc)2	1661.63	2L_a
(HexNAc)3 (GlcA)1 + (Man)3(GlcNAc)2	1864.71	3bL_a
(HexNAc)4 (GlcA)1 + (Man)3(GlcNAc)2	2067.79	4bL_a
(HexNAc)5 (GlcA)1 + (Man)3(GlcNAc)2	2270.87	5a
(Hex)1 (HexNAc)1 (GlcA)1 + (Man)3(GlcNAc)2	1620.6	1_a
(Hex)1 (HexNAc)2 (GlcA)1 + (Man)3(GlcNAc)2	1823.68	2L_a
(Hex)1 (HexNAc)3 (GlcA)1 + (Man)3(GlcNAc)2	2026.76	3bL_a
(Hex)1 (HexNAc)4 (GlcA)1 + (Man)3(GlcNAc)2	2229.84	4bL_a
(Hex)1 (HexNAc)5 (GlcA)1 + (Man)3(GlcNAc)2	2432.92	5a
(Hex)2 (HexNAc)1 (GlcA)1 + (Man)3(GlcNAc)2	1782.66	Hy_a
(Hex)2 (HexNAc)2 (GlcA)1 + (Man)3(GlcNAc)2	1985.73	2L_a
(Hex)2 (HexNAc)3 (GlcA)1 + (Man)3(GlcNAc)2	2188.81	3b_a
(Hex)2 (HexNAc)4 (GlcA)1 + (Man)3(GlcNAc)2	2391.89	4bL_a
(Hex)2 (HexNAc)5 (GlcA)1 + (Man)3(GlcNAc)2	2594.97	5a
(Hex)3 (HexNAc)1 (GlcA)1 + (Man)3(GlcNAc)2	1944.71	Hy_a
(Hex)3 (HexNAc)2 (GlcA)1 + (Man)3(GlcNAc)2	2147.79	Hy_a
(Hex)3 (HexNAc)3 (GlcA)1 + (Man)3(GlcNAc)2	2350.87	3_a
(Hex)3 (HexNAc)4 (GlcA)1 + (Man)3(GlcNAc)2	2553.95	4b_a
(Hex)3 (HexNAc)5 (GlcA)1 + (Man)3(GlcNAc)2	2757.03	5a
(Hex)4 (HexNAc)1 (GlcA)1 + (Man)3(GlcNAc)2	2106.76	Hy_a
(Hex)4 (HexNAc)2 (GlcA)1 + (Man)3(GlcNAc)2	2309.84	Hy_a
(Hex)4 (HexNAc)3 (GlcA)1 + (Man)3(GlcNAc)2	2512.92	Hy_a
(Hex)4 (HexNAc)4 (GlcA)1 + (Man)3(GlcNAc)2	2716	4_a
(Hex)4 (HexNAc)5 (GlcA)1 + (Man)3(GlcNAc)2	2919.08	5a
(Hex)5 (HexNAc)1 (GlcA)1 + (Man)3(GlcNAc)2	2268.81	Hy_a
(Hex)5 (HexNAc)2 (GlcA)1 + (Man)3(GlcNAc)2	2471.89	Hy_a
(Hex)5 (HexNAc)3 (GlcA)1 + (Man)3(GlcNAc)2	2674.97	Hy_a
(Hex)5 (HexNAc)4 (GlcA)1 + (Man)3(GlcNAc)2	2878.05	Hy_a
(Hex)5 (HexNAc)5 (GlcA)1 + (Man)3(GlcNAc)2	3081.13	5a
(Hex)6 (HexNAc)1 (GlcA)1 + (Man)3(GlcNAc)2	2430.87	Hy_a
(Hex)6 (HexNAc)2 (GlcA)1 + (Man)3(GlcNAc)2	2633.95	Hy_a
(Hex)6 (HexNAc)3 (GlcA)1 + (Man)3(GlcNAc)2	2837.02	Hy_a
(Hex)6 (HexNAc)4 (GlcA)1 + (Man)3(GlcNAc)2	3040.1	Hy_a
(Hex)6 (HexNAc)5 (GlcA)1 + (Man)3(GlcNAc)2	3243.18	Hy_a
(HexNAc)1 (Fuc)1 (GlcA)1 + (Man)3(GlcNAc)2	1604.61	1_a_F
(HexNAc)2 (Fuc)1 (GlcA)1 + (Man)3(GlcNAc)2	1807.69	2L_a_F
(HexNAc)3 (Fuc)1 (GlcA)1 + (Man)3(GlcNAc)2	2010.77	3bL_a_F
(HexNAc)4 (Fuc)1 (GlcA)1 + (Man)3(GlcNAc)2	2213.85	4bL_a_F
(HexNAc)5 (Fuc)1 (GlcA)1 + (Man)3(GlcNAc)2	2416.92	5a
(Hex)1 (HexNAc)1 (Fuc)1 (GlcA)1 + (Man)3(GlcNAc)2	1766.66	1_a_F
(Hex)1 (HexNAc)2 (Fuc)1 (GlcA)1 + (Man)3(GlcNAc)2	1969.74	2L_a_F
(Hex)1 (HexNAc)3 (Fuc)1 (GlcA)1 + (Man)3(GlcNAc)2	2172.82	3bL_a_F
(Hex)1 (HexNAc)4 (Fuc)1 (GlcA)1 + (Man)3(GlcNAc)2	2375.9	4bL_a_F
(Hex)1 (HexNAc)5 (Fuc)1 (GlcA)1 + (Man)3(GlcNAc)2	2578.98	5a
(Hex)2 (HexNAc)1 (Fuc)1 (GlcA)1 + (Man)3(GlcNAc)2	1928.71	Hy_a_F
(Hex)2 (HexNAc)2 (Fuc)1 (GlcA)1 + (Man)3(GlcNAc)2	2131.79	2L_a_F
(Hex)2 (HexNAc)3 (Fuc)1 (GlcA)1 + (Man)3(GlcNAc)2	2334.87	3b_a_F
(Hex)2 (HexNAc)4 (Fuc)1 (GlcA)1 + (Man)3(GlcNAc)2	2537.95	4bL_a_F
(Hex)2 (HexNAc)5 (Fuc)1 (GlcA)1 + (Man)3(GlcNAc)2	2741.03	5a
(Hex)3 (HexNAc)1 (Fuc)1 (GlcA)1 + (Man)3(GlcNAc)2	2090.77	Hy_a_F
(Hex)3 (HexNAc)2 (Fuc)1 (GlcA)1 + (Man)3(GlcNAc)2	2293.85	Hy_a_F
(Hex)3 (HexNAc)3 (Fuc)1 (GlcA)1 + (Man)3(GlcNAc)2	2496.92	3_a_F
(Hex)3 (HexNAc)4 (Fuc)1 (GlcA)1 + (Man)3(GlcNAc)2	2700	4b_a_F
(Hex)3 (HexNAc)5 (Fuc)1 (GlcA)1 + (Man)3(GlcNAc)2	2903.08	5a
(Hex)4 (HexNAc)1 (Fuc)1 (GlcA)1 + (Man)3(GlcNAc)2	2252.82	Hy_a_F
(Hex)4 (HexNAc)2 (Fuc)1 (GlcA)1 + (Man)3(GlcNAc)2	2455.9	Hy_a_F
(Hex)4 (HexNAc)3 (Fuc)1 (GlcA)1 + (Man)3(GlcNAc)2	2658.98	Hy_a_F
(Hex)4 (HexNAc)4 (Fuc)1 (GlcA)1 + (Man)3(GlcNAc)2	2862.06	4_a_F
(Hex)4 (HexNAc)5 (Fuc)1 (GlcA)1 + (Man)3(GlcNAc)2	3065.14	5a
(Hex)5 (HexNAc)1 (Fuc)1 (GlcA)1 + (Man)3(GlcNAc)2	2414.87	Hy_a_F
(Hex)5 (HexNAc)2 (Fuc)1 (GlcA)1 + (Man)3(GlcNAc)2	2617.95	Hy_a_F
(Hex)5 (HexNAc)3 (Fuc)1 (GlcA)1 + (Man)3(GlcNAc)2	2821.03	Hy_a_F
(Hex)5 (HexNAc)4 (Fuc)1 (GlcA)1 + (Man)3(GlcNAc)2	3024.11	Hy_a_F
(Hex)5 (HexNAc)5 (Fuc)1 (GlcA)1 + (Man)3(GlcNAc)2	3227.19	5a
(Hex)6 (HexNAc)1 (Fuc)1 (GlcA)1 + (Man)3(GlcNAc)2	2576.92	Hy_a_F
(Hex)6 (HexNAc)2 (Fuc)1 (GlcA)1 + (Man)3(GlcNAc)2	2780	Hy_a_F
(Hex)6 (HexNAc)3 (Fuc)1 (GlcA)1 + (Man)3(GlcNAc)2	2983.08	Hy_a_F
(Hex)6 (HexNAc)4 (Fuc)1 (GlcA)1 + (Man)3(GlcNAc)2	3186.16	Hy_a_F
(Hex)6 (HexNAc)5 (Fuc)1 (GlcA)1 + (Man)3(GlcNAc)2	3389.24	Hy_a_F
(HexNAc)3 (Fuc)2 (GlcA)1 + (Man)3(GlcNAc)2	2156.82	3bL_a_F
(HexNAc)4 (Fuc)2 (GlcA)1 + (Man)3(GlcNAc)2	2359.9	4bL_a_F
(HexNAc)5 (Fuc)2 (GlcA)1 + (Man)3(GlcNAc)2	2562.98	5a
(Hex)1 (HexNAc)3 (Fuc)2 (GlcA)1 + (Man)3(GlcNAc)2	2318.88	3bL_a_F
(Hex)1 (HexNAc)4 (Fuc)2 (GlcA)1 + (Man)3(GlcNAc)2	2521.96	4bL_a_F
(Hex)1 (HexNAc)5 (Fuc)2 (GlcA)1 + (Man)3(GlcNAc)2	2725.04	5a
(Hex)2 (HexNAc)1 (Fuc)2 (GlcA)1 + (Man)3(GlcNAc)2	2074.77	Hy_a_F
(Hex)2 (HexNAc)3 (Fuc)2 (GlcA)1 + (Man)3(GlcNAc)2	2480.93	3b_a_F
(Hex)2 (HexNAc)4 (Fuc)2 (GlcA)1 + (Man)3(GlcNAc)2	2684.01	4bL_a_F
(Hex)2 (HexNAc)5 (Fuc)2 (GlcA)1 + (Man)3(GlcNAc)2	2887.09	5a
(Hex)3 (HexNAc)1 (Fuc)2 (GlcA)1 + (Man)3(GlcNAc)2	2236.82	Hy_a_F
(Hex)3 (HexNAc)2 (Fuc)2 (GlcA)1 + (Man)3(GlcNAc)2	2439.9	Hy_a_F
(Hex)3 (HexNAc)3 (Fuc)2 (GlcA)1 + (Man)3(GlcNAc)2	2642.98	3_a_F
(Hex)3 (HexNAc)4 (Fuc)2 (GlcA)1 + (Man)3(GlcNAc)2	2846.06	4b_a_F
(Hex)3 (HexNAc)5 (Fuc)2 (GlcA)1 + (Man)3(GlcNAc)2	3049.14	5a
(Hex)4 (HexNAc)1 (Fuc)2 (GlcA)1 + (Man)3(GlcNAc)2	2398.88	Hy_a_F
(Hex)4 (HexNAc)2 (Fuc)2 (GlcA)1 + (Man)3(GlcNAc)2	2601.96	Hy_a_F
(Hex)4 (HexNAc)3 (Fuc)2 (GlcA)1 + (Man)3(GlcNAc)2	2805.04	Hy_a_F
(Hex)4 (HexNAc)4 (Fuc)2 (GlcA)1 + (Man)3(GlcNAc)2	3008.11	4_a_F
(Hex)4 (HexNAc)5 (Fuc)2 (GlcA)1 + (Man)3(GlcNAc)2	3211.19	5a
(Hex)5 (HexNAc)1 (Fuc)2 (GlcA)1 + (Man)3(GlcNAc)2	2560.93	Hy_a_F
(Hex)5 (HexNAc)2 (Fuc)2 (GlcA)1 + (Man)3(GlcNAc)2	2764.01	Hy_a_F
(Hex)5 (HexNAc)3 (Fuc)2 (GlcA)1 + (Man)3(GlcNAc)2	2967.09	Hy_a_F
(Hex)5 (HexNAc)4 (Fuc)2 (GlcA)1 + (Man)3(GlcNAc)2	3170.17	Hy_a_F
(Hex)5 (HexNAc)5 (Fuc)2 (GlcA)1 + (Man)3(GlcNAc)2	3373.25	5a
(Hex)6 (HexNAc)1 (Fuc)2 (GlcA)1 + (Man)3(GlcNAc)2	2722.98	Hy_a_F
(Hex)6 (HexNAc)2 (Fuc)2 (GlcA)1 + (Man)3(GlcNAc)2	2926.06	Hy_a_F
(Hex)6 (HexNAc)3 (Fuc)2 (GlcA)1 + (Man)3(GlcNAc)2	3129.14	Hy_a_F
(Hex)6 (HexNAc)4 (Fuc)2 (GlcA)1 + (Man)3(GlcNAc)2	3332.22	Hy_a_F
(Hex)6 (HexNAc)5 (Fuc)2 (GlcA)1 + (Man)3(GlcNAc)2	3535.3	Hy_a_F
(HexNAc)3 (Fuc)3 (GlcA)1 + (Man)3(GlcNAc)2	2302.88	3bL_a_F
(HexNAc)4 (Fuc)3 (GlcA)1 + (Man)3(GlcNAc)2	2505.96	4bL_a_F
(HexNAc)5 (Fuc)3 (GlcA)1 + (Man)3(GlcNAc)2	2709.04	5a
(Hex)1 (HexNAc)3 (Fuc)3 (GlcA)1 + (Man)3(GlcNAc)2	2464.93	3bL_a_F
(Hex)1 (HexNAc)4 (Fuc)3 (GlcA)1 + (Man)3(GlcNAc)2	2668.01	4bL_a_F
(Hex)1 (HexNAc)5 (Fuc)3 (GlcA)1 + (Man)3(GlcNAc)2	2871.09	5a
(Hex)2 (HexNAc)1 (Fuc)3 (GlcA)1 + (Man)3(GlcNAc)2	2220.83	Hy_a_F
(Hex)2 (HexNAc)3 (Fuc)3 (GlcA)1 + (Man)3(GlcNAc)2	2626.99	3b_a_F
(Hex)2 (HexNAc)4 (Fuc)3 (GlcA)1 + (Man)3(GlcNAc)2	2830.07	4bL_a_F
(Hex)2 (HexNAc)5 (Fuc)3 (GlcA)1 + (Man)3(GlcNAc)2	3033.15	5a
(Hex)3 (HexNAc)1 (Fuc)3 (GlcA)1 + (Man)3(GlcNAc)2	2382.88	Hy_a_F
(Hex)3 (HexNAc)2 (Fuc)3 (GlcA)1 + (Man)3(GlcNAc)2	2585.96	Hy_a_F
(Hex)3 (HexNAc)3 (Fuc)3 (GlcA)1 + (Man)3(GlcNAc)2	2789.04	3_a_F
(Hex)3 (HexNAc)4 (Fuc)3 (GlcA)1 + (Man)3(GlcNAc)2	2992.12	4b_a_F
(Hex)3 (HexNAc)5 (Fuc)3 (GlcA)1 + (Man)3(GlcNAc)2	3195.2	5a
(Hex)4 (HexNAc)1 (Fuc)3 (GlcA)1 + (Man)3(GlcNAc)2	2544.93	Hy_a_F
(Hex)4 (HexNAc)2 (Fuc)3 (GlcA)1 + (Man)3(GlcNAc)2	2748.01	Hy_a_F
(Hex)4 (HexNAc)3 (Fuc)3 (GlcA)1 + (Man)3(GlcNAc)2	2951.09	Hy_a_F
(Hex)4 (HexNAc)4 (Fuc)3 (GlcA)1 + (Man)3(GlcNAc)2	3154.17	4_a_F
(Hex)4 (HexNAc)5 (Fuc)3 (GlcA)1 + (Man)3(GlcNAc)2	3357.25	5a
(Hex)5 (HexNAc)1 (Fuc)3 (GlcA)1 + (Man)3(GlcNAc)2	2706.99	Hy_a_F
(Hex)5 (HexNAc)2 (Fuc)3 (GlcA)1 + (Man)3(GlcNAc)2	2910.07	Hy_a_F
(Hex)5 (HexNAc)3 (Fuc)3 (GlcA)1 + (Man)3(GlcNAc)2	3113.15	Hy_a_F
(Hex)5 (HexNAc)4 (Fuc)3 (GlcA)1 + (Man)3(GlcNAc)2	3316.23	Hy_a_F
(Hex)5 (HexNAc)5 (Fuc)3 (GlcA)1 + (Man)3(GlcNAc)2	3519.3	5a
(Hex)6 (HexNAc)1 (Fuc)3 (GlcA)1 + (Man)3(GlcNAc)2	2869.04	Hy_a_F
(Hex)6 (HexNAc)2 (Fuc)3 (GlcA)1 + (Man)3(GlcNAc)2	3072.12	Hy_a_F
(Hex)6 (HexNAc)3 (Fuc)3 (GlcA)1 + (Man)3(GlcNAc)2	3275.2	Hy_a_F
(Hex)6 (HexNAc)4 (Fuc)3 (GlcA)1 + (Man)3(GlcNAc)2	3478.28	Hy_a_F
(Hex)6 (HexNAc)5 (Fuc)3 (GlcA)1 + (Man)3(GlcNAc)2	3681.36	Hy_a_F
(HexNAc)1 (6NeuAc)1 + (Man)3(GlcNAc)2	1573.61	1_a
(HexNAc)1 (3-8NeuAc)1 + (Man)3(GlcNAc)2	1545.58	1_a
(HexNAc)2 (6NeuAc)1 + (Man)3(GlcNAc)2	1776.69	2L_a
(HexNAc)2 (3-8NeuAc)1 + (Man)3(GlcNAc)2	1748.66	2L_a
(HexNAc)3 (6NeuAc)1 + (Man)3(GlcNAc)2	1979.77	3bL_a
(HexNAc)3 (3-8NeuAc)1 + (Man)3(GlcNAc)2	1951.74	3bL_a
(HexNAc)4 (6NeuAc)1 + (Man)3(GlcNAc)2	2182.85	4bL_a
(HexNAc)4 (3-8NeuAc)1 + (Man)3(GlcNAc)2	2154.82	4bL_a
(HexNAc)5 (6NeuAc)1 + (Man)3(GlcNAc)2	2385.93	5a
(HexNAc)5 (3-8NeuAc)1 + (Man)3(GlcNAc)2	2357.9	5a
(Hex)1 (HexNAc)1 (6NeuAc)1 + (Man)3(GlcNAc)2	1735.67	1_a
(Hex)1 (HexNAc)1 (3-8NeuAc)1 + (Man)3(GlcNAc)2	1707.63	1_a
(Hex)1 (HexNAc)2 (6NeuAc)1 + (Man)3(GlcNAc)2	1938.74	2L_a
(Hex)1 (HexNAc)2 (3-8NeuAc)1 + (Man)3(GlcNAc)2	1910.71	2L_a
(Hex)1 (HexNAc)3 (6NeuAc)1 + (Man)3(GlcNAc)2	2141.82	3bL_a
(Hex)1 (HexNAc)3 (3-8NeuAc)1 + (Man)3(GlcNAc)2	2113.79	3bL_a
(Hex)1 (HexNAc)4 (6NeuAc)1 + (Man)3(GlcNAc)2	2344.9	4bL_a
(Hex)1 (HexNAc)4 (3-8NeuAc)1 + (Man)3(GlcNAc)2	2316.87	4bL_a
(Hex)1 (HexNAc)5 (6NeuAc)1 + (Man)3(GlcNAc)2	2547.98	5a
(Hex)1 (HexNAc)5 (3-8NeuAc)1 + (Man)3(GlcNAc)2	2519.95	5a
(Hex)2 (HexNAc)1 (6NeuAc)1 + (Man)3(GlcNAc)2	1897.72	Hy_a
(Hex)2 (HexNAc)1 (3-8NeuAc)1 + (Man)3(GlcNAc)2	1869.69	Hy_a
(Hex)2 (HexNAc)2 (6NeuAc)1 + (Man)3(GlcNAc)2	2100.8	2L_a
(Hex)2 (HexNAc)2 (3-8NeuAc)1 + (Man)3(GlcNAc)2	2072.77	2L_a
(Hex)2 (HexNAc)3 (6NeuAc)1 + (Man)3(GlcNAc)2	2303.88	3b_a
(Hex)2 (HexNAc)3 (3-8NeuAc)1 + (Man)3(GlcNAc)2	2275.85	3b_a
(Hex)2 (HexNAc)4 (6NeuAc)1 + (Man)3(GlcNAc)2	2506.96	4bL_a
(Hex)2 (HexNAc)4 (3-8NeuAc)1 + (Man)3(GlcNAc)2	2478.93	4bL_a
(Hex)2 (HexNAc)5 (6NeuAc)1 + (Man)3(GlcNAc)2	2710.04	5a
(Hex)2 (HexNAc)5 (3-8NeuAc)1 + (Man)3(GlcNAc)2	2682	5a
(Hex)3 (HexNAc)1 (6NeuAc)1 + (Man)3(GlcNAc)2	2059.77	Hy_a
(Hex)3 (HexNAc)1 (3-8NeuAc)1 + (Man)3(GlcNAc)2	2031.74	Hy_a
(Hex)3 (HexNAc)2 (6NeuAc)1 + (Man)3(GlcNAc)2	2262.85	Hy_a
(Hex)3 (HexNAc)2 (3-8NeuAc)1 + (Man)3(GlcNAc)2	2234.82	Hy_a
(Hex)3 (HexNAc)3 (6NeuAc)1 + (Man)3(GlcNAc)2	2465.93	3_a
(Hex)3 (HexNAc)3 (3-8NeuAc)1 + (Man)3(GlcNAc)2	2437.9	3_a
(Hex)3 (HexNAc)4 (6NeuAc)1 + (Man)3(GlcNAc)2	2669.01	4b_a
(Hex)3 (HexNAc)4 (3-8NeuAc)1 + (Man)3(GlcNAc)2	2640.98	4b_a
(Hex)3 (HexNAc)5 (6NeuAc)1 + (Man)3(GlcNAc)2	2872.09	5a
(Hex)3 (HexNAc)5 (3-8NeuAc)1 + (Man)3(GlcNAc)2	2844.06	5a
(Hex)4 (HexNAc)1 (6NeuAc)1 + (Man)3(GlcNAc)2	2221.82	Hy_a
(Hex)4 (HexNAc)1 (3-8NeuAc)1 + (Man)3(GlcNAc)2	2193.79	Hy_a
(Hex)4 (HexNAc)2 (6NeuAc)1 + (Man)3(GlcNAc)2	2424.9	Hy_a
(Hex)4 (HexNAc)2 (3-8NeuAc)1 + (Man)3(GlcNAc)2	2396.87	Hy_a
(Hex)4 (HexNAc)3 (6NeuAc)1 + (Man)3(GlcNAc)2	2627.98	Hy_a
(Hex)4 (HexNAc)3 (3-8NeuAc)1 + (Man)3(GlcNAc)2	2599.95	Hy_a
(Hex)4 (HexNAc)4 (6NeuAc)1 + (Man)3(GlcNAc)2	2831.06	4_a
(Hex)4 (HexNAc)4 (3-8NeuAc)1 + (Man)3(GlcNAc)2	2803.03	4_a
(Hex)4 (HexNAc)5 (6NeuAc)1 + (Man)3(GlcNAc)2	3034.14	5a
(Hex)4 (HexNAc)5 (3-8NeuAc)1 + (Man)3(GlcNAc)2	3006.11	5a
(Hex)5 (HexNAc)1 (6NeuAc)1 + (Man)3(GlcNAc)2	2383.88	Hy_a
(Hex)5 (HexNAc)1 (3-8NeuAc)1 + (Man)3(GlcNAc)2	2355.85	Hy_a
(Hex)5 (HexNAc)2 (6NeuAc)1 + (Man)3(GlcNAc)2	2586.96	Hy_a
(Hex)5 (HexNAc)2 (3-8NeuAc)1 + (Man)3(GlcNAc)2	2558.92	Hy_a
(Hex)5 (HexNAc)3 (6NeuAc)1 + (Man)3(GlcNAc)2	2790.04	Hy_a
(Hex)5 (HexNAc)3 (3-8NeuAc)1 + (Man)3(GlcNAc)2	2762	Hy_a
(Hex)5 (HexNAc)4 (6NeuAc)1 + (Man)3(GlcNAc)2	2993.11	Hy_a
(Hex)5 (HexNAc)4 (3-8NeuAc)1 + (Man)3(GlcNAc)2	2965.08	Hy_a
(Hex)5 (HexNAc)5 (6NeuAc)1 + (Man)3(GlcNAc)2	3196.19	5a
(Hex)5 (HexNAc)5 (3-8NeuAc)1 + (Man)3(GlcNAc)2	3168.16	5a
(Hex)6 (HexNAc)1 (6NeuAc)1 + (Man)3(GlcNAc)2	2545.93	Hy_a
(Hex)6 (HexNAc)1 (3-8NeuAc)1 + (Man)3(GlcNAc)2	2517.9	Hy_a
(Hex)6 (HexNAc)2 (6NeuAc)1 + (Man)3(GlcNAc)2	2749.01	Hy_a
(Hex)6 (HexNAc)2 (3-8NeuAc)1 + (Man)3(GlcNAc)2	2720.98	Hy_a
(Hex)6 (HexNAc)3 (6NeuAc)1 + (Man)3(GlcNAc)2	2952.09	Hy_a
(Hex)6 (HexNAc)3 (3-8NeuAc)1 + (Man)3(GlcNAc)2	2924.06	Hy_a
(Hex)6 (HexNAc)4 (6NeuAc)1 + (Man)3(GlcNAc)2	3155.17	Hy_a
(Hex)6 (HexNAc)4 (3-8NeuAc)1 + (Man)3(GlcNAc)2	3127.14	Hy_a
(Hex)6 (HexNAc)5 (6NeuAc)1 + (Man)3(GlcNAc)2	3358.25	Hy_a
(Hex)6 (HexNAc)5 (3-8NeuAc)1 + (Man)3(GlcNAc)2	3330.22	Hy_a
(HexNAc)1 (Fuc)1 (6NeuAc)1 + (Man)3(GlcNAc)2	1719.67	1_a_F
(HexNAc)1 (Fuc)1 (3-8NeuAc)1 + (Man)3(GlcNAc)2	1691.64	1_a_F
(HexNAc)2 (Fuc)1 (6NeuAc)1 + (Man)3(GlcNAc)2	1922.75	2L_a_F
(HexNAc)2 (Fuc)1 (3-8NeuAc)1 + (Man)3(GlcNAc)2	1894.72	2L_a_F
(HexNAc)3 (Fuc)1 (6NeuAc)1 + (Man)3(GlcNAc)2	2125.83	3bL_a_F
(HexNAc)3 (Fuc)1 (3-8NeuAc)1 + (Man)3(GlcNAc)2	2097.8	3bL_a_F
(HexNAc)4 (Fuc)1 (6NeuAc)1 + (Man)3(GlcNAc)2	2328.91	4bL_a_F
(HexNAc)4 (Fuc)1 (3-8NeuAc)1 + (Man)3(GlcNAc)2	2300.88	4bL_a_F
(HexNAc)5 (Fuc)1 (6NeuAc)1 + (Man)3(GlcNAc)2	2531.99	5a
(HexNAc)5 (Fuc)1 (3-8NeuAc)1 + (Man)3(GlcNAc)2	2503.96	5a
(Hex)1 (HexNAc)1 (Fuc)1 (6NeuAc)1 + (Man)3(GlcNAc)2	1881.72	1_a_F
(Hex)1 (HexNAc)1 (Fuc)1 (3-8NeuAc)1 + (Man)3(GlcNAc)2	1853.69	1_a_F
(Hex)1 (HexNAc)2 (Fuc)1 (6NeuAc)1 + (Man)3(GlcNAc)2	2084.8	2L_a_F
(Hex)1 (HexNAc)2 (Fuc)1 (3-8NeuAc)1 + (Man)3(GlcNAc)2	2056.77	2L_a_F
(Hex)1 (HexNAc)3 (Fuc)1 (6NeuAc)1 + (Man)3(GlcNAc)2	2287.88	3bL_a_F
(Hex)1 (HexNAc)3 (Fuc)1 (3-8NeuAc)1 + (Man)3(GlcNAc)2	2259.85	3bL_a_F
(Hex)1 (HexNAc)4 (Fuc)1 (6NeuAc)1 + (Man)3(GlcNAc)2	2490.96	4bL_a_F
(Hex)1 (HexNAc)4 (Fuc)1 (3-8NeuAc)1 + (Man)3(GlcNAc)2	2462.93	4bL_a_F
(Hex)1 (HexNAc)5 (Fuc)1 (6NeuAc)1 + (Man)3(GlcNAc)2	2694.04	5a
(Hex)1 (HexNAc)5 (Fuc)1 (3-8NeuAc)1 + (Man)3(GlcNAc)2	2666.01	5a
(Hex)2 (HexNAc)1 (Fuc)1 (6NeuAc)1 + (Man)3(GlcNAc)2	2043.78	Hy_a_F
(Hex)2 (HexNAc)1 (Fuc)1 (3-8NeuAc)1 + (Man)3(GlcNAc)2	2015.74	Hy_a_F
(Hex)2 (HexNAc)2 (Fuc)1 (6NeuAc)1 + (Man)3(GlcNAc)2	2246.86	2L_a_F
(Hex)2 (HexNAc)2 (Fuc)1 (3-8NeuAc)1 + (Man)3(GlcNAc)2	2218.82	2L_a_F
(Hex)2 (HexNAc)3 (Fuc)1 (6NeuAc)1 + (Man)3(GlcNAc)2	2449.93	3b_a_F
(Hex)2 (HexNAc)3 (Fuc)1 (3-8NeuAc)1 + (Man)3(GlcNAc)2	2421.9	3b_a_F
(Hex)2 (HexNAc)4 (Fuc)1 (6NeuAc)1 + (Man)3(GlcNAc)2	2653.01	4bL_a_F
(Hex)2 (HexNAc)4 (Fuc)1 (3-8NeuAc)1 + (Man)3(GlcNAc)2	2624.98	4bL_a_F
(Hex)2 (HexNAc)5 (Fuc)1 (6NeuAc)1 + (Man)3(GlcNAc)2	2856.09	5a
(Hex)2 (HexNAc)5 (Fuc)1 (3-8NeuAc)1 + (Man)3(GlcNAc)2	2828.06	5a
(Hex)3 (HexNAc)1 (Fuc)1 (6NeuAc)1 + (Man)3(GlcNAc)2	2205.83	Hy_a_F
(Hex)3 (HexNAc)1 (Fuc)1 (3-8NeuAc)1 + (Man)3(GlcNAc)2	2177.8	Hy_a_F
(Hex)3 (HexNAc)2 (Fuc)1 (6NeuAc)1 + (Man)3(GlcNAc)2	2408.91	Hy_a_F
(Hex)3 (HexNAc)2 (Fuc)1 (3-8NeuAc)1 + (Man)3(GlcNAc)2	2380.88	Hy_a_F
(Hex)3 (HexNAc)3 (Fuc)1 (6NeuAc)1 + (Man)3(GlcNAc)2	2611.99	3_a_F
(Hex)3 (HexNAc)3 (Fuc)1 (3-8NeuAc)1 + (Man)3(GlcNAc)2	2583.96	3_a_F
(Hex)3 (HexNAc)4 (Fuc)1 (6NeuAc)1 + (Man)3(GlcNAc)2	2815.07	4b_a_F
(Hex)3 (HexNAc)4 (Fuc)1 (3-8NeuAc)1 + (Man)3(GlcNAc)2	2787.04	4b_a_F
(Hex)3 (HexNAc)5 (Fuc)1 (6NeuAc)1 + (Man)3(GlcNAc)2	3018.15	5a
(Hex)3 (HexNAc)5 (Fuc)1 (3-8NeuAc)1 + (Man)3(GlcNAc)2	2990.11	5a
(Hex)4 (HexNAc)1 (Fuc)1 (6NeuAc)1 + (Man)3(GlcNAc)2	2367.88	Hy_a_F
(Hex)4 (HexNAc)1 (Fuc)1 (3-8NeuAc)1 + (Man)3(GlcNAc)2	2339.85	Hy_a_F
(Hex)4 (HexNAc)2 (Fuc)1 (6NeuAc)1 + (Man)3(GlcNAc)2	2570.96	Hy_a_F
(Hex)4 (HexNAc)2 (Fuc)1 (3-8NeuAc)1 + (Man)3(GlcNAc)2	2542.93	Hy_a_F
(Hex)4 (HexNAc)3 (Fuc)1 (6NeuAc)1 + (Man)3(GlcNAc)2	2774.04	Hy_a_F
(Hex)4 (HexNAc)3 (Fuc)1 (3-8NeuAc)1 + (Man)3(GlcNAc)2	2746.01	Hy_a_F
(Hex)4 (HexNAc)4 (Fuc)1 (6NeuAc)1 + (Man)3(GlcNAc)2	2977.12	4_a_F
(Hex)4 (HexNAc)4 (Fuc)1 (3-8NeuAc)1 + (Man)3(GlcNAc)2	2949.09	4_a_F
(Hex)4 (HexNAc)5 (Fuc)1 (6NeuAc)1 + (Man)3(GlcNAc)2	3180.2	5a
(Hex)4 (HexNAc)5 (Fuc)1 (3-8NeuAc)1 + (Man)3(GlcNAc)2	3152.17	5a
(Hex)5 (HexNAc)1 (Fuc)1 (6NeuAc)1 + (Man)3(GlcNAc)2	2529.93	Hy_a_F
(Hex)5 (HexNAc)1 (Fuc)1 (3-8NeuAc)1 + (Man)3(GlcNAc)2	2501.9	Hy_a_F
(Hex)5 (HexNAc)2 (Fuc)1 (6NeuAc)1 + (Man)3(GlcNAc)2	2733.01	Hy_a_F
(Hex)5 (HexNAc)2 (Fuc)1 (3-8NeuAc)1 + (Man)3(GlcNAc)2	2704.98	Hy_a_F
(Hex)5 (HexNAc)3 (Fuc)1 (6NeuAc)1 + (Man)3(GlcNAc)2	2936.09	Hy_a_F
(Hex)5 (HexNAc)3 (Fuc)1 (3-8NeuAc)1 + (Man)3(GlcNAc)2	2908.06	Hy_a_F
(Hex)5 (HexNAc)4 (Fuc)1 (6NeuAc)1 + (Man)3(GlcNAc)2	3139.17	Hy_a_F
(Hex)5 (HexNAc)4 (Fuc)1 (3-8NeuAc)1 + (Man)3(GlcNAc)2	3111.14	Hy_a_F
(Hex)5 (HexNAc)5 (Fuc)1 (6NeuAc)1 + (Man)3(GlcNAc)2	3342.25	5a
(Hex)5 (HexNAc)5 (Fuc)1 (3-8NeuAc)1 + (Man)3(GlcNAc)2	3314.22	5a
(Hex)6 (HexNAc)1 (Fuc)1 (6NeuAc)1 + (Man)3(GlcNAc)2	2691.99	Hy_a_F
(Hex)6 (HexNAc)1 (Fuc)1 (3-8NeuAc)1 + (Man)3(GlcNAc)2	2663.96	Hy_a_F
(Hex)6 (HexNAc)2 (Fuc)1 (6NeuAc)1 + (Man)3(GlcNAc)2	2895.07	Hy_a_F
(Hex)6 (HexNAc)2 (Fuc)1 (3-8NeuAc)1 + (Man)3(GlcNAc)2	2867.04	Hy_a_F
(Hex)6 (HexNAc)3 (Fuc)1 (6NeuAc)1 + (Man)3(GlcNAc)2	3098.15	Hy_a_F
(Hex)6 (HexNAc)3 (Fuc)1 (3-8NeuAc)1 + (Man)3(GlcNAc)2	3070.11	Hy_a_F
(Hex)6 (HexNAc)4 (Fuc)1 (6NeuAc)1 + (Man)3(GlcNAc)2	3301.23	Hy_a_F
(Hex)6 (HexNAc)4 (Fuc)1 (3-8NeuAc)1 + (Man)3(GlcNAc)2	3273.19	Hy_a_F
(Hex)6 (HexNAc)5 (Fuc)1 (6NeuAc)1 + (Man)3(GlcNAc)2	3504.3	Hy_a_F
(Hex)6 (HexNAc)5 (Fuc)1 (3-8NeuAc)1 + (Man)3(GlcNAc)2	3476.27	Hy_a_F
(HexNAc)3 (Fuc)2 (6NeuAc)1 + (Man)3(GlcNAc)2	2271.89	3bL_a_F
(HexNAc)3 (Fuc)2 (3-8NeuAc)1 + (Man)3(GlcNAc)2	2243.86	3bL_a_F
(HexNAc)4 (Fuc)2 (6NeuAc)1 + (Man)3(GlcNAc)2	2474.97	4bL_a_F
(HexNAc)4 (Fuc)2 (3-8NeuAc)1 + (Man)3(GlcNAc)2	2446.94	4bL_a_F
(HexNAc)5 (Fuc)2 (6NeuAc)1 + (Man)3(GlcNAc)2	2678.05	5a
(HexNAc)5 (Fuc)2 (3-8NeuAc)1 + (Man)3(GlcNAc)2	2650.01	5a
(Hex)1 (HexNAc)3 (Fuc)2 (6NeuAc)1 + (Man)3(GlcNAc)2	2433.94	3bL_a_F
(Hex)1 (HexNAc)3 (Fuc)2 (3-8NeuAc)1 + (Man)3(GlcNAc)2	2405.91	3bL_a_F
(Hex)1 (HexNAc)4 (Fuc)2 (6NeuAc)1 + (Man)3(GlcNAc)2	2637.02	4bL_a_F
(Hex)1 (HexNAc)4 (Fuc)2 (3-8NeuAc)1 + (Man)3(GlcNAc)2	2608.99	4bL_a_F
(Hex)1 (HexNAc)5 (Fuc)2 (6NeuAc)1 + (Man)3(GlcNAc)2	2840.1	5a
(Hex)1 (HexNAc)5 (Fuc)2 (3-8NeuAc)1 + (Man)3(GlcNAc)2	2812.07	5a
(Hex)2 (HexNAc)1 (Fuc)2 (6NeuAc)1 + (Man)3(GlcNAc)2	2189.83	Hy_a_F
(Hex)2 (HexNAc)1 (Fuc)2 (3-8NeuAc)1 + (Man)3(GlcNAc)2	2161.8	Hy_a_F
(Hex)2 (HexNAc)3 (Fuc)2 (6NeuAc)1 + (Man)3(GlcNAc)2	2595.99	3b_a_F
(Hex)2 (HexNAc)3 (Fuc)2 (3-8NeuAc)1 + (Man)3(GlcNAc)2	2567.96	3b_a_F
(Hex)2 (HexNAc)4 (Fuc)2 (6NeuAc)1 + (Man)3(GlcNAc)2	2799.07	4bL_a_F
(Hex)2 (HexNAc)4 (Fuc)2 (3-8NeuAc)1 + (Man)3(GlcNAc)2	2771.04	4bL_a_F
(Hex)2 (HexNAc)5 (Fuc)2 (6NeuAc)1 + (Man)3(GlcNAc)2	3002.15	5a
(Hex)2 (HexNAc)5 (Fuc)2 (3-8NeuAc)1 + (Man)3(GlcNAc)2	2974.12	5a
(Hex)3 (HexNAc)1 (Fuc)2 (6NeuAc)1 + (Man)3(GlcNAc)2	2351.89	Hy_a_F
(Hex)3 (HexNAc)1 (Fuc)2 (3-8NeuAc)1 + (Man)3(GlcNAc)2	2323.86	Hy_a_F
(Hex)3 (HexNAc)2 (Fuc)2 (6NeuAc)1 + (Man)3(GlcNAc)2	2554.97	Hy_a_F
(Hex)3 (HexNAc)2 (Fuc)2 (3-8NeuAc)1 + (Man)3(GlcNAc)2	2526.93	Hy_a_F
(Hex)3 (HexNAc)3 (Fuc)2 (6NeuAc)1 + (Man)3(GlcNAc)2	2758.05	3_a_F
(Hex)3 (HexNAc)3 (Fuc)2 (3-8NeuAc)1 + (Man)3(GlcNAc)2	2730.01	3_a_F
(Hex)3 (HexNAc)4 (Fuc)2 (6NeuAc)1 + (Man)3(GlcNAc)2	2961.12	4b_a_F
(Hex)3 (HexNAc)4 (Fuc)2 (3-8NeuAc)1 + (Man)3(GlcNAc)2	2933.09	4b_a_F
(Hex)3 (HexNAc)5 (Fuc)2 (6NeuAc)1 + (Man)3(GlcNAc)2	3164.2	5a
(Hex)3 (HexNAc)5 (Fuc)2 (3-8NeuAc)1 + (Man)3(GlcNAc)2	3136.17	5a
(Hex)4 (HexNAc)1 (Fuc)2 (6NeuAc)1 + (Man)3(GlcNAc)2	2513.94	Hy_a_F
(Hex)4 (HexNAc)1 (Fuc)2 (3-8NeuAc)1 + (Man)3(GlcNAc)2	2485.91	Hy_a_F
(Hex)4 (HexNAc)2 (Fuc)2 (6NeuAc)1 + (Man)3(GlcNAc)2	2717.02	Hy_a_F
(Hex)4 (HexNAc)2 (Fuc)2 (3-8NeuAc)1 + (Man)3(GlcNAc)2	2688.99	Hy_a_F
(Hex)4 (HexNAc)3 (Fuc)2 (6NeuAc)1 + (Man)3(GlcNAc)2	2920.1	Hy_a_F
(Hex)4 (HexNAc)3 (Fuc)2 (3-8NeuAc)1 + (Man)3(GlcNAc)2	2892.07	Hy_a_F
(Hex)4 (HexNAc)4 (Fuc)2 (6NeuAc)1 + (Man)3(GlcNAc)2	3123.18	4_a_F
(Hex)4 (HexNAc)4 (Fuc)2 (3-8NeuAc)1 + (Man)3(GlcNAc)2	3095.15	4_a_F
(Hex)4 (HexNAc)5 (Fuc)2 (6NeuAc)1 + (Man)3(GlcNAc)2	3326.26	5a
(Hex)4 (HexNAc)5 (Fuc)2 (3-8NeuAc)1 + (Man)3(GlcNAc)2	3298.23	5a
(Hex)5 (HexNAc)1 (Fuc)2 (6NeuAc)1 + (Man)3(GlcNAc)2	2675.99	Hy_a_F
(Hex)5 (HexNAc)1 (Fuc)2 (3-8NeuAc)1 + (Man)3(GlcNAc)2	2647.96	Hy_a_F
(Hex)5 (HexNAc)2 (Fuc)2 (6NeuAc)1 + (Man)3(GlcNAc)2	2879.07	Hy_a_F
(Hex)5 (HexNAc)2 (Fuc)2 (3-8NeuAc)1 + (Man)3(GlcNAc)2	2851.04	Hy_a_F
(Hex)5 (HexNAc)3 (Fuc)2 (6NeuAc)1 + (Man)3(GlcNAc)2	3082.15	Hy_a_F
(Hex)5 (HexNAc)3 (Fuc)2 (3-8NeuAc)1 + (Man)3(GlcNAc)2	3054.12	Hy_a_F
(Hex)5 (HexNAc)4 (Fuc)2 (6NeuAc)1 + (Man)3(GlcNAc)2	3285.23	Hy_a_F
(Hex)5 (HexNAc)4 (Fuc)2 (3-8NeuAc)1 + (Man)3(GlcNAc)2	3257.2	Hy_a_F
(Hex)5 (HexNAc)5 (Fuc)2 (6NeuAc)1 + (Man)3(GlcNAc)2	3488.31	5a
(Hex)5 (HexNAc)5 (Fuc)2 (3-8NeuAc)1 + (Man)3(GlcNAc)2	3460.28	5a
(Hex)6 (HexNAc)1 (Fuc)2 (6NeuAc)1 + (Man)3(GlcNAc)2	2838.05	Hy_a_F
(Hex)6 (HexNAc)1 (Fuc)2 (3-8NeuAc)1 + (Man)3(GlcNAc)2	2810.01	Hy_a_F
(Hex)6 (HexNAc)2 (Fuc)2 (6NeuAc)1 + (Man)3(GlcNAc)2	3041.12	Hy_a_F
(Hex)6 (HexNAc)2 (Fuc)2 (3-8NeuAc)1 + (Man)3(GlcNAc)2	3013.09	Hy_a_F
(Hex)6 (HexNAc)3 (Fuc)2 (6NeuAc)1 + (Man)3(GlcNAc)2	3244.2	Hy_a_F
(Hex)6 (HexNAc)3 (Fuc)2 (3-8NeuAc)1 + (Man)3(GlcNAc)2	3216.17	Hy_a_F
(Hex)6 (HexNAc)4 (Fuc)2 (6NeuAc)1 + (Man)3(GlcNAc)2	3447.28	Hy_a_F
(Hex)6 (HexNAc)4 (Fuc)2 (3-8NeuAc)1 + (Man)3(GlcNAc)2	3419.25	Hy_a_F
(Hex)6 (HexNAc)5 (Fuc)2 (6NeuAc)1 + (Man)3(GlcNAc)2	3650.36	Hy_a_F
(Hex)6 (HexNAc)5 (Fuc)2 (3-8NeuAc)1 + (Man)3(GlcNAc)2	3622.33	Hy_a_F
(HexNAc)3 (Fuc)3 (6NeuAc)1 + (Man)3(GlcNAc)2	2417.95	3bL_a_F
(HexNAc)3 (Fuc)3 (3-8NeuAc)1 + (Man)3(GlcNAc)2	2389.91	3bL_a_F
(HexNAc)4 (Fuc)3 (6NeuAc)1 + (Man)3(GlcNAc)2	2621.02	4bL_a_F
(HexNAc)4 (Fuc)3 (3-8NeuAc)1 + (Man)3(GlcNAc)2	2592.99	4bL_a_F
(HexNAc)5 (Fuc)3 (6NeuAc)1 + (Man)3(GlcNAc)2	2824.1	5a
(HexNAc)5 (Fuc)3 (3-8NeuAc)1 + (Man)3(GlcNAc)2	2796.07	5a
(Hex)1 (HexNAc)3 (Fuc)3 (6NeuAc)1 + (Man)3(GlcNAc)2	2580	3bL_a_F
(Hex)1 (HexNAc)3 (Fuc)3 (3-8NeuAc)1 + (Man)3(GlcNAc)2	2551.97	3bL_a_F
(Hex)1 (HexNAc)4 (Fuc)3 (6NeuAc)1 + (Man)3(GlcNAc)2	2783.08	4bL_a_F
(Hex)1 (HexNAc)4 (Fuc)3 (3-8NeuAc)1 + (Man)3(GlcNAc)2	2755.05	4bL_a_F
(Hex)1 (HexNAc)5 (Fuc)3 (6NeuAc)1 + (Man)3(GlcNAc)2	2986.16	5a
(Hex)1 (HexNAc)5 (Fuc)3 (3-8NeuAc)1 + (Man)3(GlcNAc)2	2958.13	5a
(Hex)2 (HexNAc)1 (Fuc)3 (6NeuAc)1 + (Man)3(GlcNAc)2	2335.89	Hy_a_F
(Hex)2 (HexNAc)1 (Fuc)3 (3-8NeuAc)1 + (Man)3(GlcNAc)2	2307.86	Hy_a_F
(Hex)2 (HexNAc)3 (Fuc)3 (6NeuAc)1 + (Man)3(GlcNAc)2	2742.05	3b_a_F
(Hex)2 (HexNAc)3 (Fuc)3 (3-8NeuAc)1 + (Man)3(GlcNAc)2	2714.02	3b_a_F
(Hex)2 (HexNAc)4 (Fuc)3 (6NeuAc)1 + (Man)3(GlcNAc)2	2945.13	4bL_a_F
(Hex)2 (HexNAc)4 (Fuc)3 (3-8NeuAc)1 + (Man)3(GlcNAc)2	2917.1	4bL_a_F
(Hex)2 (HexNAc)5 (Fuc)3 (6NeuAc)1 + (Man)3(GlcNAc)2	3148.21	5a
(Hex)2 (HexNAc)5 (Fuc)3 (3-8NeuAc)1 + (Man)3(GlcNAc)2	3120.18	5a
(Hex)3 (HexNAc)1 (Fuc)3 (6NeuAc)1 + (Man)3(GlcNAc)2	2497.94	Hy_a_F
(Hex)3 (HexNAc)1 (Fuc)3 (3-8NeuAc)1 + (Man)3(GlcNAc)2	2469.91	Hy_a_F
(Hex)3 (HexNAc)2 (Fuc)3 (6NeuAc)1 + (Man)3(GlcNAc)2	2701.02	Hy_a_F
(Hex)3 (HexNAc)2 (Fuc)3 (3-8NeuAc)1 + (Man)3(GlcNAc)2	2672.99	Hy_a_F
(Hex)3 (HexNAc)3 (Fuc)3 (6NeuAc)1 + (Man)3(GlcNAc)2	2904.1	3_a_F
(Hex)3 (HexNAc)3 (Fuc)3 (3-8NeuAc)1 + (Man)3(GlcNAc)2	2876.07	3_a_F
(Hex)3 (HexNAc)4 (Fuc)3 (6NeuAc)1 + (Man)3(GlcNAc)2	3107.18	4b_a_F
(Hex)3 (HexNAc)4 (Fuc)3 (3-8NeuAc)1 + (Man)3(GlcNAc)2	3079.15	4b_a_F
(Hex)3 (HexNAc)5 (Fuc)3 (6NeuAc)1 + (Man)3(GlcNAc)2	3310.26	5a
(Hex)3 (HexNAc)5 (Fuc)3 (3-8NeuAc)1 + (Man)3(GlcNAc)2	3282.23	5a
(Hex)4 (HexNAc)1 (Fuc)3 (6NeuAc)1 + (Man)3(GlcNAc)2	2660	Hy_a_F
(Hex)4 (HexNAc)1 (Fuc)3 (3-8NeuAc)1 + (Man)3(GlcNAc)2	2631.97	Hy_a_F
(Hex)4 (HexNAc)2 (Fuc)3 (6NeuAc)1 + (Man)3(GlcNAc)2	2863.08	Hy_a_F
(Hex)4 (HexNAc)2 (Fuc)3 (3-8NeuAc)1 + (Man)3(GlcNAc)2	2835.05	Hy_a_F
(Hex)4 (HexNAc)3 (Fuc)3 (6NeuAc)1 + (Man)3(GlcNAc)2	3066.16	Hy_a_F
(Hex)4 (HexNAc)3 (Fuc)3 (3-8NeuAc)1 + (Man)3(GlcNAc)2	3038.12	Hy_a_F
(Hex)4 (HexNAc)4 (Fuc)3 (6NeuAc)1 + (Man)3(GlcNAc)2	3269.24	4_a_F
(Hex)4 (HexNAc)4 (Fuc)3 (3-8NeuAc)1 + (Man)3(GlcNAc)2	3241.2	4_a_F
(Hex)4 (HexNAc)5 (Fuc)3 (6NeuAc)1 + (Man)3(GlcNAc)2	3472.31	5a
(Hex)4 (HexNAc)5 (Fuc)3 (3-8NeuAc)1 + (Man)3(GlcNAc)2	3444.28	5a
(Hex)5 (HexNAc)1 (Fuc)3 (6NeuAc)1 + (Man)3(GlcNAc)2	2822.05	Hy_a_F
(Hex)5 (HexNAc)1 (Fuc)3 (3-8NeuAc)1 + (Man)3(GlcNAc)2	2794.02	Hy_a_F
(Hex)5 (HexNAc)2 (Fuc)3 (6NeuAc)1 + (Man)3(GlcNAc)2	3025.13	Hy_a_F
(Hex)5 (HexNAc)2 (Fuc)3 (3-8NeuAc)1 + (Man)3(GlcNAc)2	2997.1	Hy_a_F
(Hex)5 (HexNAc)3 (Fuc)3 (6NeuAc)1 + (Man)3(GlcNAc)2	3228.21	Hy_a_F
(Hex)5 (HexNAc)3 (Fuc)3 (3-8NeuAc)1 + (Man)3(GlcNAc)2	3200.18	Hy_a_F
(Hex)5 (HexNAc)4 (Fuc)3 (6NeuAc)1 + (Man)3(GlcNAc)2	3431.29	Hy_a_F
(Hex)5 (HexNAc)4 (Fuc)3 (3-8NeuAc)1 + (Man)3(GlcNAc)2	3403.26	Hy_a_F
(Hex)5 (HexNAc)5 (Fuc)3 (6NeuAc)1 + (Man)3(GlcNAc)2	3634.37	5a
(Hex)5 (HexNAc)5 (Fuc)3 (3-8NeuAc)1 + (Man)3(GlcNAc)2	3606.34	5a
(Hex)6 (HexNAc)1 (Fuc)3 (6NeuAc)1 + (Man)3(GlcNAc)2	2984.1	Hy_a_F
(Hex)6 (HexNAc)1 (Fuc)3 (3-8NeuAc)1 + (Man)3(GlcNAc)2	2956.07	Hy_a_F
(Hex)6 (HexNAc)2 (Fuc)3 (6NeuAc)1 + (Man)3(GlcNAc)2	3187.18	Hy_a_F
(Hex)6 (HexNAc)2 (Fuc)3 (3-8NeuAc)1 + (Man)3(GlcNAc)2	3159.15	Hy_a_F
(Hex)6 (HexNAc)3 (Fuc)3 (6NeuAc)1 + (Man)3(GlcNAc)2	3390.26	Hy_a_F
(Hex)6 (HexNAc)3 (Fuc)3 (3-8NeuAc)1 + (Man)3(GlcNAc)2	3362.23	Hy_a_F
(Hex)6 (HexNAc)4 (Fuc)3 (6NeuAc)1 + (Man)3(GlcNAc)2	3593.34	Hy_a_F
(Hex)6 (HexNAc)4 (Fuc)3 (3-8NeuAc)1 + (Man)3(GlcNAc)2	3565.31	Hy_a_F
(Hex)6 (HexNAc)5 (Fuc)3 (6NeuAc)1 + (Man)3(GlcNAc)2	3796.42	Hy_a_F
(Hex)6 (HexNAc)5 (Fuc)3 (3-8NeuAc)1 + (Man)3(GlcNAc)2	3768.39	Hy_a_F
(Hex)1 (HexNAc)2 (6NeuAc)1 (GlcA)1 + (Man)3(GlcNAc)2	2155.84	2L_a
(Hex)1 (HexNAc)2 (3-8NeuAc)1 (GlcA)1 + (Man)3(GlcNAc)2	2127.81	2L_a
(Hex)1 (HexNAc)3 (6NeuAc)1 (GlcA)1 + (Man)3(GlcNAc)2	2358.92	3bL_a
(Hex)1 (HexNAc)3 (3-8NeuAc)1 (GlcA)1 + (Man)3(GlcNAc)2	2330.89	3bL_a
(Hex)1 (HexNAc)4 (6NeuAc)1 (GlcA)1 + (Man)3(GlcNAc)2	2562	4bL_a
(Hex)1 (HexNAc)4 (3-8NeuAc)1 (GlcA)1 + (Man)3(GlcNAc)2	2533.97	4bL_a
(Hex)1 (HexNAc)5 (6NeuAc)1 (GlcA)1 + (Man)3(GlcNAc)2	2765.08	5a
(Hex)1 (HexNAc)5 (3-8NeuAc)1 (GlcA)1 + (Man)3(GlcNAc)2	2737.05	5a
(Hex)2 (HexNAc)2 (6NeuAc)1 (GlcA)1 + (Man)3(GlcNAc)2	2317.89	2L_a
(Hex)2 (HexNAc)2 (3-8NeuAc)1 (GlcA)1 + (Man)3(GlcNAc)2	2289.86	2L_a
(Hex)2 (HexNAc)3 (6NeuAc)1 (GlcA)1 + (Man)3(GlcNAc)2	2520.97	3b_a
(Hex)2 (HexNAc)3 (3-8NeuAc)1 (GlcA)1 + (Man)3(GlcNAc)2	2492.94	3b_a
(Hex)2 (HexNAc)4 (6NeuAc)1 (GlcA)1 + (Man)3(GlcNAc)2	2724.05	4bL_a
(Hex)2 (HexNAc)4 (3-8NeuAc)1 (GlcA)1 + (Man)3(GlcNAc)2	2696.02	4bL_a
(Hex)2 (HexNAc)5 (6NeuAc)1 (GlcA)1 + (Man)3(GlcNAc)2	2927.13	5a
(Hex)2 (HexNAc)5 (3-8NeuAc)1 (GlcA)1 + (Man)3(GlcNAc)2	2899.1	5a
(Hex)3 (HexNAc)2 (6NeuAc)1 (GlcA)1 + (Man)3(GlcNAc)2	2479.95	Hy_a
(Hex)3 (HexNAc)2 (3-8NeuAc)1 (GlcA)1 + (Man)3(GlcNAc)2	2451.91	Hy_a
(Hex)3 (HexNAc)3 (6NeuAc)1 (GlcA)1 + (Man)3(GlcNAc)2	2683.02	3_a
(Hex)3 (HexNAc)3 (3-8NeuAc)1 (GlcA)1 + (Man)3(GlcNAc)2	2654.99	3_a
(Hex)3 (HexNAc)4 (6NeuAc)1 (GlcA)1 + (Man)3(GlcNAc)2	2886.1	4b_a
(Hex)3 (HexNAc)4 (3-8NeuAc)1 (GlcA)1 + (Man)3(GlcNAc)2	2858.07	4b_a
(Hex)3 (HexNAc)5 (6NeuAc)1 (GlcA)1 + (Man)3(GlcNAc)2	3089.18	5a
(Hex)3 (HexNAc)5 (3-8NeuAc)1 (GlcA)1 + (Man)3(GlcNAc)2	3061.15	5a
(Hex)4 (HexNAc)2 (6NeuAc)1 (GlcA)1 + (Man)3(GlcNAc)2	2642	Hy_a
(Hex)4 (HexNAc)2 (3-8NeuAc)1 (GlcA)1 + (Man)3(GlcNAc)2	2613.97	Hy_a
(Hex)4 (HexNAc)3 (6NeuAc)1 (GlcA)1 + (Man)3(GlcNAc)2	2845.08	Hy_a
(Hex)4 (HexNAc)3 (3-8NeuAc)1 (GlcA)1 + (Man)3(GlcNAc)2	2817.05	Hy_a
(Hex)4 (HexNAc)4 (6NeuAc)1 (GlcA)1 + (Man)3(GlcNAc)2	3048.16	4_a
(Hex)4 (HexNAc)4 (3-8NeuAc)1 (GlcA)1 + (Man)3(GlcNAc)2	3020.13	4_a
(Hex)4 (HexNAc)5 (6NeuAc)1 (GlcA)1 + (Man)3(GlcNAc)2	3251.24	5a
(Hex)4 (HexNAc)5 (3-8NeuAc)1 (GlcA)1 + (Man)3(GlcNAc)2	3223.2	5a
(Hex)5 (HexNAc)2 (6NeuAc)1 (GlcA)1 + (Man)3(GlcNAc)2	2804.05	Hy_a
(Hex)5 (HexNAc)2 (3-8NeuAc)1 (GlcA)1 + (Man)3(GlcNAc)2	2776.02	Hy_a
(Hex)5 (HexNAc)3 (6NeuAc)1 (GlcA)1 + (Man)3(GlcNAc)2	3007.13	Hy_a
(Hex)5 (HexNAc)3 (3-8NeuAc)1 (GlcA)1 + (Man)3(GlcNAc)2	2979.1	Hy_a
(Hex)5 (HexNAc)4 (6NeuAc)1 (GlcA)1 + (Man)3(GlcNAc)2	3210.21	Hy_a
(Hex)5 (HexNAc)4 (3-8NeuAc)1 (GlcA)1 + (Man)3(GlcNAc)2	3182.18	Hy_a
(Hex)5 (HexNAc)5 (6NeuAc)1 (GlcA)1 + (Man)3(GlcNAc)2	3413.29	5a
(Hex)5 (HexNAc)5 (3-8NeuAc)1 (GlcA)1 + (Man)3(GlcNAc)2	3385.26	5a
(Hex)6 (HexNAc)2 (6NeuAc)1 (GlcA)1 + (Man)3(GlcNAc)2	2966.1	Hy_a
(Hex)6 (HexNAc)2 (3-8NeuAc)1 (GlcA)1 + (Man)3(GlcNAc)2	2938.07	Hy_a
(Hex)6 (HexNAc)3 (6NeuAc)1 (GlcA)1 + (Man)3(GlcNAc)2	3169.18	Hy_a
(Hex)6 (HexNAc)3 (3-8NeuAc)1 (GlcA)1 + (Man)3(GlcNAc)2	3141.15	Hy_a
(Hex)6 (HexNAc)4 (6NeuAc)1 (GlcA)1 + (Man)3(GlcNAc)2	3372.26	Hy_a
(Hex)6 (HexNAc)4 (3-8NeuAc)1 (GlcA)1 + (Man)3(GlcNAc)2	3344.23	Hy_a
(Hex)6 (HexNAc)5 (6NeuAc)1 (GlcA)1 + (Man)3(GlcNAc)2	3575.34	Hy_a
(Hex)6 (HexNAc)5 (3-8NeuAc)1 (GlcA)1 + (Man)3(GlcNAc)2	3547.31	Hy_a
(Hex)1 (HexNAc)2 (Fuc)1 (6NeuAc)1 (GlcA)1 + (Man)3(GlcNAc)2	2301.9	2L_a_F
(Hex)1 (HexNAc)2 (Fuc)1 (3-8NeuAc)1 (GlcA)1 + (Man)3(GlcNAc)2	2273.87	2L_a_F
(Hex)1 (HexNAc)3 (Fuc)1 (6NeuAc)1 (GlcA)1 + (Man)3(GlcNAc)2	2504.98	3bL_a_F
(Hex)1 (HexNAc)3 (Fuc)1 (3-8NeuAc)1 (GlcA)1 + (Man)3(GlcNAc)2	2476.95	3bL_a_F
(Hex)1 (HexNAc)4 (Fuc)1 (6NeuAc)1 (GlcA)1 + (Man)3(GlcNAc)2	2708.06	4bL_a_F
(Hex)1 (HexNAc)4 (Fuc)1 (3-8NeuAc)1 (GlcA)1 + (Man)3(GlcNAc)2	2680.03	4bL_a_F
(Hex)1 (HexNAc)5 (Fuc)1 (6NeuAc)1 (GlcA)1 + (Man)3(GlcNAc)2	2911.14	5a
(Hex)1 (HexNAc)5 (Fuc)1 (3-8NeuAc)1 (GlcA)1 + (Man)3(GlcNAc)2	2883.1	5a
(Hex)2 (HexNAc)2 (Fuc)1 (6NeuAc)1 (GlcA)1 + (Man)3(GlcNAc)2	2463.95	2L_a_F
(Hex)2 (HexNAc)2 (Fuc)1 (3-8NeuAc)1 (GlcA)1 + (Man)3(GlcNAc)2	2435.92	2L_a_F
(Hex)2 (HexNAc)3 (Fuc)1 (6NeuAc)1 (GlcA)1 + (Man)3(GlcNAc)2	2667.03	3b_a_F
(Hex)2 (HexNAc)3 (Fuc)1 (3-8NeuAc)1 (GlcA)1 + (Man)3(GlcNAc)2	2639	3b_a_F
(Hex)2 (HexNAc)4 (Fuc)1 (6NeuAc)1 (GlcA)1 + (Man)3(GlcNAc)2	2870.11	4bL_a_F
(Hex)2 (HexNAc)4 (Fuc)1 (3-8NeuAc)1 (GlcA)1 + (Man)3(GlcNAc)2	2842.08	4bL_a_F
(Hex)2 (HexNAc)5 (Fuc)1 (6NeuAc)1 (GlcA)1 + (Man)3(GlcNAc)2	3073.19	5a
(Hex)2 (HexNAc)5 (Fuc)1 (3-8NeuAc)1 (GlcA)1 + (Man)3(GlcNAc)2	3045.16	5a
(Hex)3 (HexNAc)2 (Fuc)1 (6NeuAc)1 (GlcA)1 + (Man)3(GlcNAc)2	2626	Hy_a_F
(Hex)3 (HexNAc)2 (Fuc)1 (3-8NeuAc)1 (GlcA)1 + (Man)3(GlcNAc)2	2597.97	Hy_a_F
(Hex)3 (HexNAc)3 (Fuc)1 (6NeuAc)1 (GlcA)1 + (Man)3(GlcNAc)2	2829.08	3_a_F
(Hex)3 (HexNAc)3 (Fuc)1 (3-8NeuAc)1 (GlcA)1 + (Man)3(GlcNAc)2	2801.05	3_a_F
(Hex)3 (HexNAc)4 (Fuc)1 (6NeuAc)1 (GlcA)1 + (Man)3(GlcNAc)2	3032.16	4b_a_F
(Hex)3 (HexNAc)4 (Fuc)1 (3-8NeuAc)1 (GlcA)1 + (Man)3(GlcNAc)2	3004.13	4b_a_F
(Hex)3 (HexNAc)5 (Fuc)1 (6NeuAc)1 (GlcA)1 + (Man)3(GlcNAc)2	3235.24	5a
(Hex)3 (HexNAc)5 (Fuc)1 (3-8NeuAc)1 (GlcA)1 + (Man)3(GlcNAc)2	3207.21	5a
(Hex)4 (HexNAc)2 (Fuc)1 (6NeuAc)1 (GlcA)1 + (Man)3(GlcNAc)2	2788.06	Hy_a_F
(Hex)4 (HexNAc)2 (Fuc)1 (3-8NeuAc)1 (GlcA)1 + (Man)3(GlcNAc)2	2760.02	Hy_a_F
(Hex)4 (HexNAc)3 (Fuc)1 (6NeuAc)1 (GlcA)1 + (Man)3(GlcNAc)2	2991.14	Hy_a_F
(Hex)4 (HexNAc)3 (Fuc)1 (3-8NeuAc)1 (GlcA)1 + (Man)3(GlcNAc)2	2963.1	Hy_a_F
(Hex)4 (HexNAc)4 (Fuc)1 (6NeuAc)1 (GlcA)1 + (Man)3(GlcNAc)2	3194.21	4_a_F
(Hex)4 (HexNAc)4 (Fuc)1 (3-8NeuAc)1 (GlcA)1 + (Man)3(GlcNAc)2	3166.18	4_a_F
(Hex)4 (HexNAc)5 (Fuc)1 (6NeuAc)1 (GlcA)1 + (Man)3(GlcNAc)2	3397.29	5a
(Hex)4 (HexNAc)5 (Fuc)1 (3-8NeuAc)1 (GlcA)1 + (Man)3(GlcNAc)2	3369.26	5a
(Hex)5 (HexNAc)2 (Fuc)1 (6NeuAc)1 (GlcA)1 + (Man)3(GlcNAc)2	2950.11	Hy_a_F
(Hex)5 (HexNAc)2 (Fuc)1 (3-8NeuAc)1 (GlcA)1 + (Man)3(GlcNAc)2	2922.08	Hy_a_F
(Hex)5 (HexNAc)3 (Fuc)1 (6NeuAc)1 (GlcA)1 + (Man)3(GlcNAc)2	3153.19	Hy_a_F
(Hex)5 (HexNAc)3 (Fuc)1 (3-8NeuAc)1 (GlcA)1 + (Man)3(GlcNAc)2	3125.16	Hy_a_F
(Hex)5 (HexNAc)4 (Fuc)1 (6NeuAc)1 (GlcA)1 + (Man)3(GlcNAc)2	3356.27	Hy_a_F
(Hex)5 (HexNAc)4 (Fuc)1 (3-8NeuAc)1 (GlcA)1 + (Man)3(GlcNAc)2	3328.24	Hy_a_F
(Hex)5 (HexNAc)5 (Fuc)1 (6NeuAc)1 (GlcA)1 + (Man)3(GlcNAc)2	3559.35	5a
(Hex)5 (HexNAc)5 (Fuc)1 (3-8NeuAc)1 (GlcA)1 + (Man)3(GlcNAc)2	3531.32	5a
(Hex)6 (HexNAc)2 (Fuc)1 (6NeuAc)1 (GlcA)1 + (Man)3(GlcNAc)2	3112.16	Hy_a_F
(Hex)6 (HexNAc)2 (Fuc)1 (3-8NeuAc)1 (GlcA)1 + (Man)3(GlcNAc)2	3084.13	Hy_a_F
(Hex)6 (HexNAc)3 (Fuc)1 (6NeuAc)1 (GlcA)1 + (Man)3(GlcNAc)2	3315.24	Hy_a_F
(Hex)6 (HexNAc)3 (Fuc)1 (3-8NeuAc)1 (GlcA)1 + (Man)3(GlcNAc)2	3287.21	Hy_a_F
(Hex)6 (HexNAc)4 (Fuc)1 (6NeuAc)1 (GlcA)1 + (Man)3(GlcNAc)2	3518.32	Hy_a_F
(Hex)6 (HexNAc)4 (Fuc)1 (3-8NeuAc)1 (GlcA)1 + (Man)3(GlcNAc)2	3490.29	Hy_a_F
(Hex)6 (HexNAc)5 (Fuc)1 (6NeuAc)1 (GlcA)1 + (Man)3(GlcNAc)2	3721.4	Hy_a_F
(Hex)6 (HexNAc)5 (Fuc)1 (3-8NeuAc)1 (GlcA)1 + (Man)3(GlcNAc)2	3693.37	Hy_a_F
(Hex)1 (HexNAc)3 (Fuc)2 (6NeuAc)1 (GlcA)1 + (Man)3(GlcNAc)2	2651.03	3bL_a_F
(Hex)1 (HexNAc)3 (Fuc)2 (3-8NeuAc)1 (GlcA)1 + (Man)3(GlcNAc)2	2623	3bL_a_F
(Hex)1 (HexNAc)4 (Fuc)2 (6NeuAc)1 (GlcA)1 + (Man)3(GlcNAc)2	2854.11	4bL_a_F
(Hex)1 (HexNAc)4 (Fuc)2 (3-8NeuAc)1 (GlcA)1 + (Man)3(GlcNAc)2	2826.08	4bL_a_F
(Hex)1 (HexNAc)5 (Fuc)2 (6NeuAc)1 (GlcA)1 + (Man)3(GlcNAc)2	3057.19	5a
(Hex)1 (HexNAc)5 (Fuc)2 (3-8NeuAc)1 (GlcA)1 + (Man)3(GlcNAc)2	3029.16	5a
(Hex)2 (HexNAc)3 (Fuc)2 (6NeuAc)1 (GlcA)1 + (Man)3(GlcNAc)2	2813.09	3b_a_F
(Hex)2 (HexNAc)3 (Fuc)2 (3-8NeuAc)1 (GlcA)1 + (Man)3(GlcNAc)2	2785.06	3b_a_F
(Hex)2 (HexNAc)4 (Fuc)2 (6NeuAc)1 (GlcA)1 + (Man)3(GlcNAc)2	3016.17	4bL_a_F
(Hex)2 (HexNAc)4 (Fuc)2 (3-8NeuAc)1 (GlcA)1 + (Man)3(GlcNAc)2	2988.14	4bL_a_F
(Hex)2 (HexNAc)5 (Fuc)2 (6NeuAc)1 (GlcA)1 + (Man)3(GlcNAc)2	3219.25	5a
(Hex)2 (HexNAc)5 (Fuc)2 (3-8NeuAc)1 (GlcA)1 + (Man)3(GlcNAc)2	3191.22	5a
(Hex)3 (HexNAc)2 (Fuc)2 (6NeuAc)1 (GlcA)1 + (Man)3(GlcNAc)2	2772.06	Hy_a_F
(Hex)3 (HexNAc)2 (Fuc)2 (3-8NeuAc)1 (GlcA)1 + (Man)3(GlcNAc)2	2744.03	Hy_a_F
(Hex)3 (HexNAc)3 (Fuc)2 (6NeuAc)1 (GlcA)1 + (Man)3(GlcNAc)2	2975.14	3_a_F
(Hex)3 (HexNAc)3 (Fuc)2 (3-8NeuAc)1 (GlcA)1 + (Man)3(GlcNAc)2	2947.11	3_a_F
(Hex)3 (HexNAc)4 (Fuc)2 (6NeuAc)1 (GlcA)1 + (Man)3(GlcNAc)2	3178.22	4b_a_F
(Hex)3 (HexNAc)4 (Fuc)2 (3-8NeuAc)1 (GlcA)1 + (Man)3(GlcNAc)2	3150.19	4b_a_F
(Hex)3 (HexNAc)5 (Fuc)2 (6NeuAc)1 (GlcA)1 + (Man)3(GlcNAc)2	3381.3	5a
(Hex)3 (HexNAc)5 (Fuc)2 (3-8NeuAc)1 (GlcA)1 + (Man)3(GlcNAc)2	3353.27	5a
(Hex)4 (HexNAc)2 (Fuc)2 (6NeuAc)1 (GlcA)1 + (Man)3(GlcNAc)2	2934.11	Hy_a_F
(Hex)4 (HexNAc)2 (Fuc)2 (3-8NeuAc)1 (GlcA)1 + (Man)3(GlcNAc)2	2906.08	Hy_a_F
(Hex)4 (HexNAc)3 (Fuc)2 (6NeuAc)1 (GlcA)1 + (Man)3(GlcNAc)2	3137.19	Hy_a_F
(Hex)4 (HexNAc)3 (Fuc)2 (3-8NeuAc)1 (GlcA)1 + (Man)3(GlcNAc)2	3109.16	Hy_a_F
(Hex)4 (HexNAc)4 (Fuc)2 (6NeuAc)1 (GlcA)1 + (Man)3(GlcNAc)2	3340.27	4_a_F
(Hex)4 (HexNAc)4 (Fuc)2 (3-8NeuAc)1 (GlcA)1 + (Man)3(GlcNAc)2	3312.24	4_a_F
(Hex)4 (HexNAc)5 (Fuc)2 (6NeuAc)1 (GlcA)1 + (Man)3(GlcNAc)2	3543.35	5a
(Hex)4 (HexNAc)5 (Fuc)2 (3-8NeuAc)1 (GlcA)1 + (Man)3(GlcNAc)2	3515.32	5a
(Hex)5 (HexNAc)2 (Fuc)2 (6NeuAc)1 (GlcA)1 + (Man)3(GlcNAc)2	3096.17	Hy_a_F
(Hex)5 (HexNAc)2 (Fuc)2 (3-8NeuAc)1 (GlcA)1 + (Man)3(GlcNAc)2	3068.14	Hy_a_F
(Hex)5 (HexNAc)3 (Fuc)2 (6NeuAc)1 (GlcA)1 + (Man)3(GlcNAc)2	3299.25	Hy_a_F
(Hex)5 (HexNAc)3 (Fuc)2 (3-8NeuAc)1 (GlcA)1 + (Man)3(GlcNAc)2	3271.21	Hy_a_F
(Hex)5 (HexNAc)4 (Fuc)2 (6NeuAc)1 (GlcA)1 + (Man)3(GlcNAc)2	3502.33	Hy_a_F
(Hex)5 (HexNAc)4 (Fuc)2 (3-8NeuAc)1 (GlcA)1 + (Man)3(GlcNAc)2	3474.29	Hy_a_F
(Hex)5 (HexNAc)5 (Fuc)2 (6NeuAc)1 (GlcA)1 + (Man)3(GlcNAc)2	3705.4	5a
(Hex)5 (HexNAc)5 (Fuc)2 (3-8NeuAc)1 (GlcA)1 + (Man)3(GlcNAc)2	3677.37	5a
(Hex)6 (HexNAc)2 (Fuc)2 (6NeuAc)1 (GlcA)1 + (Man)3(GlcNAc)2	3258.22	Hy_a_F
(Hex)6 (HexNAc)2 (Fuc)2 (3-8NeuAc)1 (GlcA)1 + (Man)3(GlcNAc)2	3230.19	Hy_a_F
(Hex)6 (HexNAc)3 (Fuc)2 (6NeuAc)1 (GlcA)1 + (Man)3(GlcNAc)2	3461.3	Hy_a_F
(Hex)6 (HexNAc)3 (Fuc)2 (3-8NeuAc)1 (GlcA)1 + (Man)3(GlcNAc)2	3433.27	Hy_a_F
(Hex)6 (HexNAc)4 (Fuc)2 (6NeuAc)1 (GlcA)1 + (Man)3(GlcNAc)2	3664.38	Hy_a_F
(Hex)6 (HexNAc)4 (Fuc)2 (3-8NeuAc)1 (GlcA)1 + (Man)3(GlcNAc)2	3636.35	Hy_a_F
(Hex)6 (HexNAc)5 (Fuc)2 (6NeuAc)1 (GlcA)1 + (Man)3(GlcNAc)2	3867.46	Hy_a_F
(Hex)6 (HexNAc)5 (Fuc)2 (3-8NeuAc)1 (GlcA)1 + (Man)3(GlcNAc)2	3839.43	Hy_a_F
(Hex)1 (HexNAc)3 (Fuc)3 (6NeuAc)1 (GlcA)1 + (Man)3(GlcNAc)2	2797.09	3bL_a_F
(Hex)1 (HexNAc)3 (Fuc)3 (3-8NeuAc)1 (GlcA)1 + (Man)3(GlcNAc)2	2769.06	3bL_a_F
(Hex)1 (HexNAc)4 (Fuc)3 (6NeuAc)1 (GlcA)1 + (Man)3(GlcNAc)2	3000.17	4bL_a_F
(Hex)1 (HexNAc)4 (Fuc)3 (3-8NeuAc)1 (GlcA)1 + (Man)3(GlcNAc)2	2972.14	4bL_a_F
(Hex)1 (HexNAc)5 (Fuc)3 (6NeuAc)1 (GlcA)1 + (Man)3(GlcNAc)2	3203.25	5a
(Hex)1 (HexNAc)5 (Fuc)3 (3-8NeuAc)1 (GlcA)1 + (Man)3(GlcNAc)2	3175.22	5a
(Hex)2 (HexNAc)3 (Fuc)3 (6NeuAc)1 (GlcA)1 + (Man)3(GlcNAc)2	2959.15	3b_a_F
(Hex)2 (HexNAc)3 (Fuc)3 (3-8NeuAc)1 (GlcA)1 + (Man)3(GlcNAc)2	2931.11	3b_a_F
(Hex)2 (HexNAc)4 (Fuc)3 (6NeuAc)1 (GlcA)1 + (Man)3(GlcNAc)2	3162.22	4bL_a_F
(Hex)2 (HexNAc)4 (Fuc)3 (3-8NeuAc)1 (GlcA)1 + (Man)3(GlcNAc)2	3134.19	4bL_a_F
(Hex)2 (HexNAc)5 (Fuc)3 (6NeuAc)1 (GlcA)1 + (Man)3(GlcNAc)2	3365.3	5a
(Hex)2 (HexNAc)5 (Fuc)3 (3-8NeuAc)1 (GlcA)1 + (Man)3(GlcNAc)2	3337.27	5a
(Hex)3 (HexNAc)2 (Fuc)3 (6NeuAc)1 (GlcA)1 + (Man)3(GlcNAc)2	2918.12	Hy_a_F
(Hex)3 (HexNAc)2 (Fuc)3 (3-8NeuAc)1 (GlcA)1 + (Man)3(GlcNAc)2	2890.09	Hy_a_F
(Hex)3 (HexNAc)3 (Fuc)3 (6NeuAc)1 (GlcA)1 + (Man)3(GlcNAc)2	3121.2	3_a_F
(Hex)3 (HexNAc)3 (Fuc)3 (3-8NeuAc)1 (GlcA)1 + (Man)3(GlcNAc)2	3093.17	3_a_F
(Hex)3 (HexNAc)4 (Fuc)3 (6NeuAc)1 (GlcA)1 + (Man)3(GlcNAc)2	3324.28	4b_a_F
(Hex)3 (HexNAc)4 (Fuc)3 (3-8NeuAc)1 (GlcA)1 + (Man)3(GlcNAc)2	3296.25	4b_a_F
(Hex)3 (HexNAc)5 (Fuc)3 (6NeuAc)1 (GlcA)1 + (Man)3(GlcNAc)2	3527.36	5a
(Hex)3 (HexNAc)5 (Fuc)3 (3-8NeuAc)1 (GlcA)1 + (Man)3(GlcNAc)2	3499.33	5a
(Hex)4 (HexNAc)2 (Fuc)3 (6NeuAc)1 (GlcA)1 + (Man)3(GlcNAc)2	3080.17	Hy_a_F
(Hex)4 (HexNAc)2 (Fuc)3 (3-8NeuAc)1 (GlcA)1 + (Man)3(GlcNAc)2	3052.14	Hy_a_F
(Hex)4 (HexNAc)3 (Fuc)3 (6NeuAc)1 (GlcA)1 + (Man)3(GlcNAc)2	3283.25	Hy_a_F
(Hex)4 (HexNAc)3 (Fuc)3 (3-8NeuAc)1 (GlcA)1 + (Man)3(GlcNAc)2	3255.22	Hy_a_F
(Hex)4 (HexNAc)4 (Fuc)3 (6NeuAc)1 (GlcA)1 + (Man)3(GlcNAc)2	3486.33	4_a_F
(Hex)4 (HexNAc)4 (Fuc)3 (3-8NeuAc)1 (GlcA)1 + (Man)3(GlcNAc)2	3458.3	4_a_F
(Hex)4 (HexNAc)5 (Fuc)3 (6NeuAc)1 (GlcA)1 + (Man)3(GlcNAc)2	3689.41	5a
(Hex)4 (HexNAc)5 (Fuc)3 (3-8NeuAc)1 (GlcA)1 + (Man)3(GlcNAc)2	3661.38	5a
(Hex)5 (HexNAc)2 (Fuc)3 (6NeuAc)1 (GlcA)1 + (Man)3(GlcNAc)2	3242.22	Hy_a_F
(Hex)5 (HexNAc)2 (Fuc)3 (3-8NeuAc)1 (GlcA)1 + (Man)3(GlcNAc)2	3214.19	Hy_a_F
(Hex)5 (HexNAc)3 (Fuc)3 (6NeuAc)1 (GlcA)1 + (Man)3(GlcNAc)2	3445.3	Hy_a_F
(Hex)5 (HexNAc)3 (Fuc)3 (3-8NeuAc)1 (GlcA)1 + (Man)3(GlcNAc)2	3417.27	Hy_a_F
(Hex)5 (HexNAc)4 (Fuc)3 (6NeuAc)1 (GlcA)1 + (Man)3(GlcNAc)2	3648.38	Hy_a_F
(Hex)5 (HexNAc)4 (Fuc)3 (3-8NeuAc)1 (GlcA)1 + (Man)3(GlcNAc)2	3620.35	Hy_a_F
(Hex)5 (HexNAc)5 (Fuc)3 (6NeuAc)1 (GlcA)1 + (Man)3(GlcNAc)2	3851.46	5a
(Hex)5 (HexNAc)5 (Fuc)3 (3-8NeuAc)1 (GlcA)1 + (Man)3(GlcNAc)2	3823.43	5a
(Hex)6 (HexNAc)2 (Fuc)3 (6NeuAc)1 (GlcA)1 + (Man)3(GlcNAc)2	3404.28	Hy_a_F
(Hex)6 (HexNAc)2 (Fuc)3 (3-8NeuAc)1 (GlcA)1 + (Man)3(GlcNAc)2	3376.25	Hy_a_F
(Hex)6 (HexNAc)3 (Fuc)3 (6NeuAc)1 (GlcA)1 + (Man)3(GlcNAc)2	3607.36	Hy_a_F
(Hex)6 (HexNAc)3 (Fuc)3 (3-8NeuAc)1 (GlcA)1 + (Man)3(GlcNAc)2	3579.33	Hy_a_F
(Hex)6 (HexNAc)4 (Fuc)3 (6NeuAc)1 (GlcA)1 + (Man)3(GlcNAc)2	3810.44	Hy_a_F
(Hex)6 (HexNAc)4 (Fuc)3 (3-8NeuAc)1 (GlcA)1 + (Man)3(GlcNAc)2	3782.4	Hy_a_F
(Hex)6 (HexNAc)5 (Fuc)3 (6NeuAc)1 (GlcA)1 + (Man)3(GlcNAc)2	4013.52	Hy_a_F
(Hex)6 (HexNAc)5 (Fuc)3 (3-8NeuAc)1 (GlcA)1 + (Man)3(GlcNAc)2	3985.48	Hy_a_F
(Hex)1 (HexNAc)2 (6NeuAc)2 + (Man)3(GlcNAc)2	2270.9	2L_a
(Hex)1 (HexNAc)2 (3-8NeuAc)1 (6NeuAc)1 + (Man)3(GlcNAc)2	2242.87	2L_a
(Hex)1 (HexNAc)2 (3-8NeuAc)2 + (Man)3(GlcNAc)2	2214.84	2L_a
(Hex)1 (HexNAc)3 (6NeuAc)2 + (Man)3(GlcNAc)2	2473.98	3bL_a
(Hex)1 (HexNAc)3 (3-8NeuAc)1 (6NeuAc)1 + (Man)3(GlcNAc)2	2445.95	3bL_a
(Hex)1 (HexNAc)3 (3-8NeuAc)2 + (Man)3(GlcNAc)2	2417.92	3bL_a
(Hex)1 (HexNAc)4 (6NeuAc)2 + (Man)3(GlcNAc)2	2677.06	4bL_a
(Hex)1 (HexNAc)4 (3-8NeuAc)1 (6NeuAc)1 + (Man)3(GlcNAc)2	2649.03	4bL_a
(Hex)1 (HexNAc)4 (3-8NeuAc)2 + (Man)3(GlcNAc)2	2621	4bL_a
(Hex)1 (HexNAc)5 (6NeuAc)2 + (Man)3(GlcNAc)2	2880.14	5a
(Hex)1 (HexNAc)5 (3-8NeuAc)1 (6NeuAc)1 + (Man)3(GlcNAc)2	2852.11	5a
(Hex)1 (HexNAc)5 (3-8NeuAc)2 + (Man)3(GlcNAc)2	2824.08	5a
(Hex)2 (HexNAc)2 (6NeuAc)2 + (Man)3(GlcNAc)2	2432.96	2L_a
(Hex)2 (HexNAc)2 (3-8NeuAc)1 (6NeuAc)1 + (Man)3(GlcNAc)2	2404.92	2L_a
(Hex)2 (HexNAc)2 (3-8NeuAc)2 + (Man)3(GlcNAc)2	2376.89	2L_a
(Hex)2 (HexNAc)3 (6NeuAc)2 + (Man)3(GlcNAc)2	2636.04	3b_a
(Hex)2 (HexNAc)3 (3-8NeuAc)1 (6NeuAc)1 + (Man)3(GlcNAc)2	2608	3b_a
(Hex)2 (HexNAc)3 (3-8NeuAc)2 + (Man)3(GlcNAc)2	2579.97	3b_a
(Hex)2 (HexNAc)4 (6NeuAc)2 + (Man)3(GlcNAc)2	2839.11	4bL_a
(Hex)2 (HexNAc)4 (3-8NeuAc)1 (6NeuAc)1 + (Man)3(GlcNAc)2	2811.08	4bL_a
(Hex)2 (HexNAc)4 (3-8NeuAc)2 + (Man)3(GlcNAc)2	2783.05	4bL_a
(Hex)2 (HexNAc)5 (6NeuAc)2 + (Man)3(GlcNAc)2	3042.19	5a
(Hex)2 (HexNAc)5 (3-8NeuAc)1 (6NeuAc)1 + (Man)3(GlcNAc)2	3014.16	5a
(Hex)2 (HexNAc)5 (3-8NeuAc)2 + (Man)3(GlcNAc)2	2986.13	5a
(Hex)3 (HexNAc)2 (6NeuAc)2 + (Man)3(GlcNAc)2	2595.01	Hy_a
(Hex)3 (HexNAc)2 (3-8NeuAc)1 (6NeuAc)1 + (Man)3(GlcNAc)2	2566.98	Hy_a
(Hex)3 (HexNAc)2 (3-8NeuAc)2 + (Man)3(GlcNAc)2	2538.95	Hy_a
(Hex)3 (HexNAc)3 (6NeuAc)2 + (Man)3(GlcNAc)2	2798.09	3_a
(Hex)3 (HexNAc)3 (3-8NeuAc)1 (6NeuAc)1 + (Man)3(GlcNAc)2	2770.06	3_a
(Hex)3 (HexNAc)3 (3-8NeuAc)2 + (Man)3(GlcNAc)2	2742.03	3_a
(Hex)3 (HexNAc)4 (6NeuAc)2 + (Man)3(GlcNAc)2	3001.17	4b_a
(Hex)3 (HexNAc)4 (3-8NeuAc)1 (6NeuAc)1 + (Man)3(GlcNAc)2	2973.14	4b_a
(Hex)3 (HexNAc)4 (3-8NeuAc)2 + (Man)3(GlcNAc)2	2945.1	4b_a
(Hex)3 (HexNAc)5 (6NeuAc)2 + (Man)3(GlcNAc)2	3204.25	5a
(Hex)3 (HexNAc)5 (3-8NeuAc)1 (6NeuAc)1 + (Man)3(GlcNAc)2	3176.22	5a
(Hex)3 (HexNAc)5 (3-8NeuAc)2 + (Man)3(GlcNAc)2	3148.18	5a
(Hex)4 (HexNAc)2 (6NeuAc)2 + (Man)3(GlcNAc)2	2757.06	Hy_a
(Hex)4 (HexNAc)2 (3-8NeuAc)1 (6NeuAc)1 + (Man)3(GlcNAc)2	2729.03	Hy_a
(Hex)4 (HexNAc)2 (3-8NeuAc)2 + (Man)3(GlcNAc)2	2701	Hy_a
(Hex)4 (HexNAc)3 (6NeuAc)2 + (Man)3(GlcNAc)2	2960.14	Hy_a
(Hex)4 (HexNAc)3 (3-8NeuAc)1 (6NeuAc)1 + (Man)3(GlcNAc)2	2932.11	Hy_a
(Hex)4 (HexNAc)3 (3-8NeuAc)2 + (Man)3(GlcNAc)2	2904.08	Hy_a
(Hex)4 (HexNAc)4 (6NeuAc)2 + (Man)3(GlcNAc)2	3163.22	4_a
(Hex)4 (HexNAc)4 (3-8NeuAc)1 (6NeuAc)1 + (Man)3(GlcNAc)2	3135.19	4_a
(Hex)4 (HexNAc)4 (3-8NeuAc)2 + (Man)3(GlcNAc)2	3107.16	4_a
(Hex)4 (HexNAc)5 (6NeuAc)2 + (Man)3(GlcNAc)2	3366.3	5a
(Hex)4 (HexNAc)5 (3-8NeuAc)1 (6NeuAc)1 + (Man)3(GlcNAc)2	3338.27	5a
(Hex)4 (HexNAc)5 (3-8NeuAc)2 + (Man)3(GlcNAc)2	3310.24	5a
(Hex)5 (HexNAc)2 (6NeuAc)2 + (Man)3(GlcNAc)2	2919.11	Hy_a
(Hex)5 (HexNAc)2 (3-8NeuAc)1 (6NeuAc)1 + (Man)3(GlcNAc)2	2891.08	Hy_a
(Hex)5 (HexNAc)2 (3-8NeuAc)2 + (Man)3(GlcNAc)2	2863.05	Hy_a
(Hex)5 (HexNAc)3 (6NeuAc)2 + (Man)3(GlcNAc)2	3122.19	Hy_a
(Hex)5 (HexNAc)3 (3-8NeuAc)1 (6NeuAc)1 + (Man)3(GlcNAc)2	3094.16	Hy_a
(Hex)5 (HexNAc)3 (3-8NeuAc)2 + (Man)3(GlcNAc)2	3066.13	Hy_a
(Hex)5 (HexNAc)4 (6NeuAc)2 + (Man)3(GlcNAc)2	3325.27	Hy_a
(Hex)5 (HexNAc)4 (3-8NeuAc)1 (6NeuAc)1 + (Man)3(GlcNAc)2	3297.24	Hy_a
(Hex)5 (HexNAc)4 (3-8NeuAc)2 + (Man)3(GlcNAc)2	3269.21	Hy_a
(Hex)5 (HexNAc)5 (6NeuAc)2 + (Man)3(GlcNAc)2	3528.35	5a
(Hex)5 (HexNAc)5 (3-8NeuAc)1 (6NeuAc)1 + (Man)3(GlcNAc)2	3500.32	5a
(Hex)5 (HexNAc)5 (3-8NeuAc)2 + (Man)3(GlcNAc)2	3472.29	5a
(Hex)6 (HexNAc)2 (6NeuAc)2 + (Man)3(GlcNAc)2	3081.17	Hy_a
(Hex)6 (HexNAc)2 (3-8NeuAc)1 (6NeuAc)1 + (Man)3(GlcNAc)2	3053.14	Hy_a
(Hex)6 (HexNAc)2 (3-8NeuAc)2 + (Man)3(GlcNAc)2	3025.1	Hy_a
(Hex)6 (HexNAc)3 (6NeuAc)2 + (Man)3(GlcNAc)2	3284.25	Hy_a
(Hex)6 (HexNAc)3 (3-8NeuAc)1 (6NeuAc)1 + (Man)3(GlcNAc)2	3256.22	Hy_a
(Hex)6 (HexNAc)3 (3-8NeuAc)2 + (Man)3(GlcNAc)2	3228.18	Hy_a
(Hex)6 (HexNAc)4 (6NeuAc)2 + (Man)3(GlcNAc)2	3487.33	Hy_a
(Hex)6 (HexNAc)4 (3-8NeuAc)1 (6NeuAc)1 + (Man)3(GlcNAc)2	3459.29	Hy_a
(Hex)6 (HexNAc)4 (3-8NeuAc)2 + (Man)3(GlcNAc)2	3431.26	Hy_a
(Hex)6 (HexNAc)5 (6NeuAc)2 + (Man)3(GlcNAc)2	3690.41	Hy_a
(Hex)6 (HexNAc)5 (3-8NeuAc)1 (6NeuAc)1 + (Man)3(GlcNAc)2	3662.37	Hy_a
(Hex)6 (HexNAc)5 (3-8NeuAc)2 + (Man)3(GlcNAc)2	3634.34	Hy_a
(Hex)1 (HexNAc)2 (Fuc)1 (6NeuAc)2 + (Man)3(GlcNAc)2	2416.96	2L_a_F
(Hex)1 (HexNAc)2 (Fuc)1 (3-8NeuAc)1 (6NeuAc)1 + (Man)3(GlcNAc)2	2388.93	2L_a_F
(Hex)1 (HexNAc)2 (Fuc)1 (3-8NeuAc)2 + (Man)3(GlcNAc)2	2360.9	2L_a_F
(Hex)1 (HexNAc)3 (Fuc)1 (6NeuAc)2 + (Man)3(GlcNAc)2	2620.04	3bL_a_F
(Hex)1 (HexNAc)3 (Fuc)1 (3-8NeuAc)1 (6NeuAc)1 + (Man)3(GlcNAc)2	2592.01	3bL_a_F
(Hex)1 (HexNAc)3 (Fuc)1 (3-8NeuAc)2 + (Man)3(GlcNAc)2	2563.98	3bL_a_F
(Hex)1 (HexNAc)4 (Fuc)1 (6NeuAc)2 + (Man)3(GlcNAc)2	2823.12	4bL_a_F
(Hex)1 (HexNAc)4 (Fuc)1 (3-8NeuAc)1 (6NeuAc)1 + (Man)3(GlcNAc)2	2795.09	4bL_a_F
(Hex)1 (HexNAc)4 (Fuc)1 (3-8NeuAc)2 + (Man)3(GlcNAc)2	2767.06	4bL_a_F
(Hex)1 (HexNAc)5 (Fuc)1 (6NeuAc)2 + (Man)3(GlcNAc)2	3026.2	5a
(Hex)1 (HexNAc)5 (Fuc)1 (3-8NeuAc)1 (6NeuAc)1 + (Man)3(GlcNAc)2	2998.17	5a
(Hex)1 (HexNAc)5 (Fuc)1 (3-8NeuAc)2 + (Man)3(GlcNAc)2	2970.14	5a
(Hex)2 (HexNAc)2 (Fuc)1 (6NeuAc)2 + (Man)3(GlcNAc)2	2579.01	2L_a_F
(Hex)2 (HexNAc)2 (Fuc)1 (3-8NeuAc)1 (6NeuAc)1 + (Man)3(GlcNAc)2	2550.98	2L_a_F
(Hex)2 (HexNAc)2 (Fuc)1 (3-8NeuAc)2 + (Man)3(GlcNAc)2	2522.95	2L_a_F
(Hex)2 (HexNAc)3 (Fuc)1 (6NeuAc)2 + (Man)3(GlcNAc)2	2782.09	3b_a_F
(Hex)2 (HexNAc)3 (Fuc)1 (3-8NeuAc)1 (6NeuAc)1 + (Man)3(GlcNAc)2	2754.06	3b_a_F
(Hex)2 (HexNAc)3 (Fuc)1 (3-8NeuAc)2 + (Man)3(GlcNAc)2	2726.03	3b_a_F
(Hex)2 (HexNAc)4 (Fuc)1 (6NeuAc)2 + (Man)3(GlcNAc)2	2985.17	4bL_a_F
(Hex)2 (HexNAc)4 (Fuc)1 (3-8NeuAc)1 (6NeuAc)1 + (Man)3(GlcNAc)2	2957.14	4bL_a_F
(Hex)2 (HexNAc)4 (Fuc)1 (3-8NeuAc)2 + (Man)3(GlcNAc)2	2929.11	4bL_a_F
(Hex)2 (HexNAc)5 (Fuc)1 (6NeuAc)2 + (Man)3(GlcNAc)2	3188.25	5a
(Hex)2 (HexNAc)5 (Fuc)1 (3-8NeuAc)1 (6NeuAc)1 + (Man)3(GlcNAc)2	3160.22	5a
(Hex)2 (HexNAc)5 (Fuc)1 (3-8NeuAc)2 + (Man)3(GlcNAc)2	3132.19	5a
(Hex)3 (HexNAc)2 (Fuc)1 (6NeuAc)2 + (Man)3(GlcNAc)2	2741.07	Hy_a_F
(Hex)3 (HexNAc)2 (Fuc)1 (3-8NeuAc)1 (6NeuAc)1 + (Man)3(GlcNAc)2	2713.04	Hy_a_F
(Hex)3 (HexNAc)2 (Fuc)1 (3-8NeuAc)2 + (Man)3(GlcNAc)2	2685	Hy_a_F
(Hex)3 (HexNAc)3 (Fuc)1 (6NeuAc)2 + (Man)3(GlcNAc)2	2944.15	3_a_F
(Hex)3 (HexNAc)3 (Fuc)1 (3-8NeuAc)1 (6NeuAc)1 + (Man)3(GlcNAc)2	2916.11	3_a_F
(Hex)3 (HexNAc)3 (Fuc)1 (3-8NeuAc)2 + (Man)3(GlcNAc)2	2888.08	3_a_F
(Hex)3 (HexNAc)4 (Fuc)1 (6NeuAc)2 + (Man)3(GlcNAc)2	3147.23	4b_a_F
(Hex)3 (HexNAc)4 (Fuc)1 (3-8NeuAc)1 (6NeuAc)1 + (Man)3(GlcNAc)2	3119.19	4b_a_F
(Hex)3 (HexNAc)4 (Fuc)1 (3-8NeuAc)2 + (Man)3(GlcNAc)2	3091.16	4b_a_F
(Hex)3 (HexNAc)5 (Fuc)1 (6NeuAc)2 + (Man)3(GlcNAc)2	3350.3	5a
(Hex)3 (HexNAc)5 (Fuc)1 (3-8NeuAc)1 (6NeuAc)1 + (Man)3(GlcNAc)2	3322.27	5a
(Hex)3 (HexNAc)5 (Fuc)1 (3-8NeuAc)2 + (Man)3(GlcNAc)2	3294.24	5a
(Hex)4 (HexNAc)2 (Fuc)1 (6NeuAc)2 + (Man)3(GlcNAc)2	2903.12	Hy_a_F
(Hex)4 (HexNAc)2 (Fuc)1 (3-8NeuAc)1 (6NeuAc)1 + (Man)3(GlcNAc)2	2875.09	Hy_a_F
(Hex)4 (HexNAc)2 (Fuc)1 (3-8NeuAc)2 + (Man)3(GlcNAc)2	2847.06	Hy_a_F
(Hex)4 (HexNAc)3 (Fuc)1 (6NeuAc)2 + (Man)3(GlcNAc)2	3106.2	Hy_a_F
(Hex)4 (HexNAc)3 (Fuc)1 (3-8NeuAc)1 (6NeuAc)1 + (Man)3(GlcNAc)2	3078.17	Hy_a_F
(Hex)4 (HexNAc)3 (Fuc)1 (3-8NeuAc)2 + (Man)3(GlcNAc)2	3050.14	Hy_a_F
(Hex)4 (HexNAc)4 (Fuc)1 (6NeuAc)2 + (Man)3(GlcNAc)2	3309.28	4_a_F
(Hex)4 (HexNAc)4 (Fuc)1 (3-8NeuAc)1 (6NeuAc)1 + (Man)3(GlcNAc)2	3281.25	4_a_F
(Hex)4 (HexNAc)4 (Fuc)1 (3-8NeuAc)2 + (Man)3(GlcNAc)2	3253.22	4_a_F
(Hex)4 (HexNAc)5 (Fuc)1 (6NeuAc)2 + (Man)3(GlcNAc)2	3512.36	5a
(Hex)4 (HexNAc)5 (Fuc)1 (3-8NeuAc)1 (6NeuAc)1 + (Man)3(GlcNAc)2	3484.33	5a
(Hex)4 (HexNAc)5 (Fuc)1 (3-8NeuAc)2 + (Man)3(GlcNAc)2	3456.29	5a
(Hex)5 (HexNAc)2 (Fuc)1 (6NeuAc)2 + (Man)3(GlcNAc)2	3065.17	Hy_a_F
(Hex)5 (HexNAc)2 (Fuc)1 (3-8NeuAc)1 (6NeuAc)1 + (Man)3(GlcNAc)2	3037.14	Hy_a_F
(Hex)5 (HexNAc)2 (Fuc)1 (3-8NeuAc)2 + (Man)3(GlcNAc)2	3009.11	Hy_a_F
(Hex)5 (HexNAc)3 (Fuc)1 (6NeuAc)2 + (Man)3(GlcNAc)2	3268.25	Hy_a_F
(Hex)5 (HexNAc)3 (Fuc)1 (3-8NeuAc)1 (6NeuAc)1 + (Man)3(GlcNAc)2	3240.22	Hy_a_F
(Hex)5 (HexNAc)3 (Fuc)1 (3-8NeuAc)2 + (Man)3(GlcNAc)2	3212.19	Hy_a_F
(Hex)5 (HexNAc)4 (Fuc)1 (6NeuAc)2 + (Man)3(GlcNAc)2	3471.33	Hy_a_F
(Hex)5 (HexNAc)4 (Fuc)1 (3-8NeuAc)1 (6NeuAc)1 + (Man)3(GlcNAc)2	3443.3	Hy_a_F
(Hex)5 (HexNAc)4 (Fuc)1 (3-8NeuAc)2 + (Man)3(GlcNAc)2	3415.27	Hy_a_F
(Hex)5 (HexNAc)5 (Fuc)1 (6NeuAc)2 + (Man)3(GlcNAc)2	3674.41	5a
(Hex)5 (HexNAc)5 (Fuc)1 (3-8NeuAc)1 (6NeuAc)1 + (Man)3(GlcNAc)2	3646.38	5a
(Hex)5 (HexNAc)5 (Fuc)1 (3-8NeuAc)2 + (Man)3(GlcNAc)2	3618.35	5a
(Hex)6 (HexNAc)2 (Fuc)1 (6NeuAc)2 + (Man)3(GlcNAc)2	3227.23	Hy_a_F
(Hex)6 (HexNAc)2 (Fuc)1 (3-8NeuAc)1 (6NeuAc)1 + (Man)3(GlcNAc)2	3199.19	Hy_a_F
(Hex)6 (HexNAc)2 (Fuc)1 (3-8NeuAc)2 + (Man)3(GlcNAc)2	3171.16	Hy_a_F
(Hex)6 (HexNAc)3 (Fuc)1 (6NeuAc)2 + (Man)3(GlcNAc)2	3430.3	Hy_a_F
(Hex)6 (HexNAc)3 (Fuc)1 (3-8NeuAc)1 (6NeuAc)1 + (Man)3(GlcNAc)2	3402.27	Hy_a_F
(Hex)6 (HexNAc)3 (Fuc)1 (3-8NeuAc)2 + (Man)3(GlcNAc)2	3374.24	Hy_a_F
(Hex)6 (HexNAc)4 (Fuc)1 (6NeuAc)2 + (Man)3(GlcNAc)2	3633.38	Hy_a_F
(Hex)6 (HexNAc)4 (Fuc)1 (3-8NeuAc)1 (6NeuAc)1 + (Man)3(GlcNAc)2	3605.35	Hy_a_F
(Hex)6 (HexNAc)4 (Fuc)1 (3-8NeuAc)2 + (Man)3(GlcNAc)2	3577.32	Hy_a_F
(Hex)6 (HexNAc)5 (Fuc)1 (6NeuAc)2 + (Man)3(GlcNAc)2	3836.46	Hy_a_F
(Hex)6 (HexNAc)5 (Fuc)1 (3-8NeuAc)1 (6NeuAc)1 + (Man)3(GlcNAc)2	3808.43	Hy_a_F
(Hex)6 (HexNAc)5 (Fuc)1 (3-8NeuAc)2 + (Man)3(GlcNAc)2	3780.4	Hy_a_F
(Hex)1 (HexNAc)3 (Fuc)2 (6NeuAc)2 + (Man)3(GlcNAc)2	2766.1	3bL_a_F
(Hex)1 (HexNAc)3 (Fuc)2 (3-8NeuAc)1 (6NeuAc)1 + (Man)3(GlcNAc)2	2738.07	3bL_a_F
(Hex)1 (HexNAc)3 (Fuc)2 (3-8NeuAc)2 + (Man)3(GlcNAc)2	2710.04	3bL_a_F
(Hex)1 (HexNAc)4 (Fuc)2 (6NeuAc)2 + (Man)3(GlcNAc)2	2969.18	4bL_a_F
(Hex)1 (HexNAc)4 (Fuc)2 (3-8NeuAc)1 (6NeuAc)1 + (Man)3(GlcNAc)2	2941.15	4bL_a_F
(Hex)1 (HexNAc)4 (Fuc)2 (3-8NeuAc)2 + (Man)3(GlcNAc)2	2913.11	4bL_a_F
(Hex)1 (HexNAc)5 (Fuc)2 (6NeuAc)2 + (Man)3(GlcNAc)2	3172.26	5a
(Hex)1 (HexNAc)5 (Fuc)2 (3-8NeuAc)1 (6NeuAc)1 + (Man)3(GlcNAc)2	3144.23	5a
(Hex)1 (HexNAc)5 (Fuc)2 (3-8NeuAc)2 + (Man)3(GlcNAc)2	3116.19	5a
(Hex)2 (HexNAc)3 (Fuc)2 (6NeuAc)2 + (Man)3(GlcNAc)2	2928.15	3b_a_F
(Hex)2 (HexNAc)3 (Fuc)2 (3-8NeuAc)1 (6NeuAc)1 + (Man)3(GlcNAc)2	2900.12	3b_a_F
(Hex)2 (HexNAc)3 (Fuc)2 (3-8NeuAc)2 + (Man)3(GlcNAc)2	2872.09	3b_a_F
(Hex)2 (HexNAc)4 (Fuc)2 (6NeuAc)2 + (Man)3(GlcNAc)2	3131.23	4bL_a_F
(Hex)2 (HexNAc)4 (Fuc)2 (3-8NeuAc)1 (6NeuAc)1 + (Man)3(GlcNAc)2	3103.2	4bL_a_F
(Hex)2 (HexNAc)4 (Fuc)2 (3-8NeuAc)2 + (Man)3(GlcNAc)2	3075.17	4bL_a_F
(Hex)2 (HexNAc)5 (Fuc)2 (6NeuAc)2 + (Man)3(GlcNAc)2	3334.31	5a
(Hex)2 (HexNAc)5 (Fuc)2 (3-8NeuAc)1 (6NeuAc)1 + (Man)3(GlcNAc)2	3306.28	5a
(Hex)2 (HexNAc)5 (Fuc)2 (3-8NeuAc)2 + (Man)3(GlcNAc)2	3278.25	5a
(Hex)3 (HexNAc)2 (Fuc)2 (6NeuAc)2 + (Man)3(GlcNAc)2	2887.12	Hy_a_F
(Hex)3 (HexNAc)2 (Fuc)2 (3-8NeuAc)1 (6NeuAc)1 + (Man)3(GlcNAc)2	2859.09	Hy_a_F
(Hex)3 (HexNAc)2 (Fuc)2 (3-8NeuAc)2 + (Man)3(GlcNAc)2	2831.06	Hy_a_F
(Hex)3 (HexNAc)3 (Fuc)2 (6NeuAc)2 + (Man)3(GlcNAc)2	3090.2	3_a_F
(Hex)3 (HexNAc)3 (Fuc)2 (3-8NeuAc)1 (6NeuAc)1 + (Man)3(GlcNAc)2	3062.17	3_a_F
(Hex)3 (HexNAc)3 (Fuc)2 (3-8NeuAc)2 + (Man)3(GlcNAc)2	3034.14	3_a_F
(Hex)3 (HexNAc)4 (Fuc)2 (6NeuAc)2 + (Man)3(GlcNAc)2	3293.28	4b_a_F
(Hex)3 (HexNAc)4 (Fuc)2 (3-8NeuAc)1 (6NeuAc)1 + (Man)3(GlcNAc)2	3265.25	4b_a_F
(Hex)3 (HexNAc)4 (Fuc)2 (3-8NeuAc)2 + (Man)3(GlcNAc)2	3237.22	4b_a_F
(Hex)3 (HexNAc)5 (Fuc)2 (6NeuAc)2 + (Man)3(GlcNAc)2	3496.36	5a
(Hex)3 (HexNAc)5 (Fuc)2 (3-8NeuAc)1 (6NeuAc)1 + (Man)3(GlcNAc)2	3468.33	5a
(Hex)3 (HexNAc)5 (Fuc)2 (3-8NeuAc)2 + (Man)3(GlcNAc)2	3440.3	5a
(Hex)4 (HexNAc)2 (Fuc)2 (6NeuAc)2 + (Man)3(GlcNAc)2	3049.18	Hy_a_F
(Hex)4 (HexNAc)2 (Fuc)2 (3-8NeuAc)1 (6NeuAc)1 + (Man)3(GlcNAc)2	3021.15	Hy_a_F
(Hex)4 (HexNAc)2 (Fuc)2 (3-8NeuAc)2 + (Man)3(GlcNAc)2	2993.11	Hy_a_F
(Hex)4 (HexNAc)3 (Fuc)2 (6NeuAc)2 + (Man)3(GlcNAc)2	3252.26	Hy_a_F
(Hex)4 (HexNAc)3 (Fuc)2 (3-8NeuAc)1 (6NeuAc)1 + (Man)3(GlcNAc)2	3224.23	Hy_a_F
(Hex)4 (HexNAc)3 (Fuc)2 (3-8NeuAc)2 + (Man)3(GlcNAc)2	3196.19	Hy_a_F
(Hex)4 (HexNAc)4 (Fuc)2 (6NeuAc)2 + (Man)3(GlcNAc)2	3455.34	4_a_F
(Hex)4 (HexNAc)4 (Fuc)2 (3-8NeuAc)1 (6NeuAc)1 + (Man)3(GlcNAc)2	3427.3	4_a_F
(Hex)4 (HexNAc)4 (Fuc)2 (3-8NeuAc)2 + (Man)3(GlcNAc)2	3399.27	4_a_F
(Hex)4 (HexNAc)5 (Fuc)2 (6NeuAc)2 + (Man)3(GlcNAc)2	3658.42	5a
(Hex)4 (HexNAc)5 (Fuc)2 (3-8NeuAc)1 (6NeuAc)1 + (Man)3(GlcNAc)2	3630.38	5a
(Hex)4 (HexNAc)5 (Fuc)2 (3-8NeuAc)2 + (Man)3(GlcNAc)2	3602.35	5a
(Hex)5 (HexNAc)2 (Fuc)2 (6NeuAc)2 + (Man)3(GlcNAc)2	3211.23	Hy_a_F
(Hex)5 (HexNAc)2 (Fuc)2 (3-8NeuAc)1 (6NeuAc)1 + (Man)3(GlcNAc)2	3183.2	Hy_a_F
(Hex)5 (HexNAc)2 (Fuc)2 (3-8NeuAc)2 + (Man)3(GlcNAc)2	3155.17	Hy_a_F
(Hex)5 (HexNAc)3 (Fuc)2 (6NeuAc)2 + (Man)3(GlcNAc)2	3414.31	Hy_a_F
(Hex)5 (HexNAc)3 (Fuc)2 (3-8NeuAc)1 (6NeuAc)1 + (Man)3(GlcNAc)2	3386.28	Hy_a_F
(Hex)5 (HexNAc)3 (Fuc)2 (3-8NeuAc)2 + (Man)3(GlcNAc)2	3358.25	Hy_a_F
(Hex)5 (HexNAc)4 (Fuc)2 (6NeuAc)2 + (Man)3(GlcNAc)2	3617.39	Hy_a_F
(Hex)5 (HexNAc)4 (Fuc)2 (3-8NeuAc)1 (6NeuAc)1 + (Man)3(GlcNAc)2	3589.36	Hy_a_F
(Hex)5 (HexNAc)4 (Fuc)2 (3-8NeuAc)2 + (Man)3(GlcNAc)2	3561.33	Hy_a_F
(Hex)5 (HexNAc)5 (Fuc)2 (6NeuAc)2 + (Man)3(GlcNAc)2	3820.47	5a
(Hex)5 (HexNAc)5 (Fuc)2 (3-8NeuAc)1 (6NeuAc)1 + (Man)3(GlcNAc)2	3792.44	5a
(Hex)5 (HexNAc)5 (Fuc)2 (3-8NeuAc)2 + (Man)3(GlcNAc)2	3764.41	5a
(Hex)6 (HexNAc)2 (Fuc)2 (6NeuAc)2 + (Man)3(GlcNAc)2	3373.28	Hy_a_F
(Hex)6 (HexNAc)2 (Fuc)2 (3-8NeuAc)1 (6NeuAc)1 + (Man)3(GlcNAc)2	3345.25	Hy_a_F
(Hex)6 (HexNAc)2 (Fuc)2 (3-8NeuAc)2 + (Man)3(GlcNAc)2	3317.22	Hy_a_F
(Hex)6 (HexNAc)3 (Fuc)2 (6NeuAc)2 + (Man)3(GlcNAc)2	3576.36	Hy_a_F
(Hex)6 (HexNAc)3 (Fuc)2 (3-8NeuAc)1 (6NeuAc)1 + (Man)3(GlcNAc)2	3548.33	Hy_a_F
(Hex)6 (HexNAc)3 (Fuc)2 (3-8NeuAc)2 + (Man)3(GlcNAc)2	3520.3	Hy_a_F
(Hex)6 (HexNAc)4 (Fuc)2 (6NeuAc)2 + (Man)3(GlcNAc)2	3779.44	Hy_a_F
(Hex)6 (HexNAc)4 (Fuc)2 (3-8NeuAc)1 (6NeuAc)1 + (Man)3(GlcNAc)2	3751.41	Hy_a_F
(Hex)6 (HexNAc)4 (Fuc)2 (3-8NeuAc)2 + (Man)3(GlcNAc)2	3723.38	Hy_a_F
(Hex)6 (HexNAc)5 (Fuc)2 (6NeuAc)2 + (Man)3(GlcNAc)2	3982.52	Hy_a_F
(Hex)6 (HexNAc)5 (Fuc)2 (3-8NeuAc)1 (6NeuAc)1 + (Man)3(GlcNAc)2	3954.49	Hy_a_F
(Hex)6 (HexNAc)5 (Fuc)2 (3-8NeuAc)2 + (Man)3(GlcNAc)2	3926.46	Hy_a_F
(Hex)1 (HexNAc)3 (Fuc)3 (6NeuAc)2 + (Man)3(GlcNAc)2	2912.16	3bL_a_F
(Hex)1 (HexNAc)3 (Fuc)3 (3-8NeuAc)1 (6NeuAc)1 + (Man)3(GlcNAc)2	2884.12	3bL_a_F
(Hex)1 (HexNAc)3 (Fuc)3 (3-8NeuAc)2 + (Man)3(GlcNAc)2	2856.09	3bL_a_F
(Hex)1 (HexNAc)4 (Fuc)3 (6NeuAc)2 + (Man)3(GlcNAc)2	3115.24	4bL_a_F
(Hex)1 (HexNAc)4 (Fuc)3 (3-8NeuAc)1 (6NeuAc)1 + (Man)3(GlcNAc)2	3087.2	4bL_a_F
(Hex)1 (HexNAc)4 (Fuc)3 (3-8NeuAc)2 + (Man)3(GlcNAc)2	3059.17	4bL_a_F
(Hex)1 (HexNAc)5 (Fuc)3 (6NeuAc)2 + (Man)3(GlcNAc)2	3318.31	5a
(Hex)1 (HexNAc)5 (Fuc)3 (3-8NeuAc)1 (6NeuAc)1 + (Man)3(GlcNAc)2	3290.28	5a
(Hex)1 (HexNAc)5 (Fuc)3 (3-8NeuAc)2 + (Man)3(GlcNAc)2	3262.25	5a
(Hex)2 (HexNAc)3 (Fuc)3 (6NeuAc)2 + (Man)3(GlcNAc)2	3074.21	3b_a_F
(Hex)2 (HexNAc)3 (Fuc)3 (3-8NeuAc)1 (6NeuAc)1 + (Man)3(GlcNAc)2	3046.18	3b_a_F
(Hex)2 (HexNAc)3 (Fuc)3 (3-8NeuAc)2 + (Man)3(GlcNAc)2	3018.15	3b_a_F
(Hex)2 (HexNAc)4 (Fuc)3 (6NeuAc)2 + (Man)3(GlcNAc)2	3277.29	4bL_a_F
(Hex)2 (HexNAc)4 (Fuc)3 (3-8NeuAc)1 (6NeuAc)1 + (Man)3(GlcNAc)2	3249.26	4bL_a_F
(Hex)2 (HexNAc)4 (Fuc)3 (3-8NeuAc)2 + (Man)3(GlcNAc)2	3221.23	4bL_a_F
(Hex)2 (HexNAc)5 (Fuc)3 (6NeuAc)2 + (Man)3(GlcNAc)2	3480.37	5a
(Hex)2 (HexNAc)5 (Fuc)3 (3-8NeuAc)1 (6NeuAc)1 + (Man)3(GlcNAc)2	3452.34	5a
(Hex)2 (HexNAc)5 (Fuc)3 (3-8NeuAc)2 + (Man)3(GlcNAc)2	3424.3	5a
(Hex)3 (HexNAc)2 (Fuc)3 (6NeuAc)2 + (Man)3(GlcNAc)2	3033.18	Hy_a_F
(Hex)3 (HexNAc)2 (Fuc)3 (3-8NeuAc)1 (6NeuAc)1 + (Man)3(GlcNAc)2	3005.15	Hy_a_F
(Hex)3 (HexNAc)2 (Fuc)3 (3-8NeuAc)2 + (Man)3(GlcNAc)2	2977.12	Hy_a_F
(Hex)3 (HexNAc)3 (Fuc)3 (6NeuAc)2 + (Man)3(GlcNAc)2	3236.26	3_a_F
(Hex)3 (HexNAc)3 (Fuc)3 (3-8NeuAc)1 (6NeuAc)1 + (Man)3(GlcNAc)2	3208.23	3_a_F
(Hex)3 (HexNAc)3 (Fuc)3 (3-8NeuAc)2 + (Man)3(GlcNAc)2	3180.2	3_a_F
(Hex)3 (HexNAc)4 (Fuc)3 (6NeuAc)2 + (Man)3(GlcNAc)2	3439.34	4b_a_F
(Hex)3 (HexNAc)4 (Fuc)3 (3-8NeuAc)1 (6NeuAc)1 + (Man)3(GlcNAc)2	3411.31	4b_a_F
(Hex)3 (HexNAc)4 (Fuc)3 (3-8NeuAc)2 + (Man)3(GlcNAc)2	3383.28	4b_a_F
(Hex)3 (HexNAc)5 (Fuc)3 (6NeuAc)2 + (Man)3(GlcNAc)2	3642.42	5a
(Hex)3 (HexNAc)5 (Fuc)3 (3-8NeuAc)1 (6NeuAc)1 + (Man)3(GlcNAc)2	3614.39	5a
(Hex)3 (HexNAc)5 (Fuc)3 (3-8NeuAc)2 + (Man)3(GlcNAc)2	3586.36	5a
(Hex)4 (HexNAc)2 (Fuc)3 (6NeuAc)2 + (Man)3(GlcNAc)2	3195.24	Hy_a_F
(Hex)4 (HexNAc)2 (Fuc)3 (3-8NeuAc)1 (6NeuAc)1 + (Man)3(GlcNAc)2	3167.2	Hy_a_F
(Hex)4 (HexNAc)2 (Fuc)3 (3-8NeuAc)2 + (Man)3(GlcNAc)2	3139.17	Hy_a_F
(Hex)4 (HexNAc)3 (Fuc)3 (6NeuAc)2 + (Man)3(GlcNAc)2	3398.31	Hy_a_F
(Hex)4 (HexNAc)3 (Fuc)3 (3-8NeuAc)1 (6NeuAc)1 + (Man)3(GlcNAc)2	3370.28	Hy_a_F
(Hex)4 (HexNAc)3 (Fuc)3 (3-8NeuAc)2 + (Man)3(GlcNAc)2	3342.25	Hy_a_F
(Hex)4 (HexNAc)4 (Fuc)3 (6NeuAc)2 + (Man)3(GlcNAc)2	3601.39	4_a_F
(Hex)4 (HexNAc)4 (Fuc)3 (3-8NeuAc)1 (6NeuAc)1 + (Man)3(GlcNAc)2	3573.36	4_a_F
(Hex)4 (HexNAc)4 (Fuc)3 (3-8NeuAc)2 + (Man)3(GlcNAc)2	3545.33	4_a_F
(Hex)4 (HexNAc)5 (Fuc)3 (6NeuAc)2 + (Man)3(GlcNAc)2	3804.47	5a
(Hex)4 (HexNAc)5 (Fuc)3 (3-8NeuAc)1 (6NeuAc)1 + (Man)3(GlcNAc)2	3776.44	5a
(Hex)4 (HexNAc)5 (Fuc)3 (3-8NeuAc)2 + (Man)3(GlcNAc)2	3748.41	5a
(Hex)5 (HexNAc)2 (Fuc)3 (6NeuAc)2 + (Man)3(GlcNAc)2	3357.29	Hy_a_F
(Hex)5 (HexNAc)2 (Fuc)3 (3-8NeuAc)1 (6NeuAc)1 + (Man)3(GlcNAc)2	3329.26	Hy_a_F
(Hex)5 (HexNAc)2 (Fuc)3 (3-8NeuAc)2 + (Man)3(GlcNAc)2	3301.23	Hy_a_F
(Hex)5 (HexNAc)3 (Fuc)3 (6NeuAc)2 + (Man)3(GlcNAc)2	3560.37	Hy_a_F
(Hex)5 (HexNAc)3 (Fuc)3 (3-8NeuAc)1 (6NeuAc)1 + (Man)3(GlcNAc)2	3532.34	Hy_a_F
(Hex)5 (HexNAc)3 (Fuc)3 (3-8NeuAc)2 + (Man)3(GlcNAc)2	3504.3	Hy_a_F
(Hex)5 (HexNAc)4 (Fuc)3 (6NeuAc)2 + (Man)3(GlcNAc)2	3763.45	Hy_a_F
(Hex)5 (HexNAc)4 (Fuc)3 (3-8NeuAc)1 (6NeuAc)1 + (Man)3(GlcNAc)2	3735.42	Hy_a_F
(Hex)5 (HexNAc)4 (Fuc)3 (3-8NeuAc)2 + (Man)3(GlcNAc)2	3707.38	Hy_a_F
(Hex)5 (HexNAc)5 (Fuc)3 (6NeuAc)2 + (Man)3(GlcNAc)2	3966.53	5a
(Hex)5 (HexNAc)5 (Fuc)3 (3-8NeuAc)1 (6NeuAc)1 + (Man)3(GlcNAc)2	3938.49	5a
(Hex)5 (HexNAc)5 (Fuc)3 (3-8NeuAc)2 + (Man)3(GlcNAc)2	3910.46	5a
(Hex)6 (HexNAc)2 (Fuc)3 (6NeuAc)2 + (Man)3(GlcNAc)2	3519.34	Hy_a_F
(Hex)6 (HexNAc)2 (Fuc)3 (3-8NeuAc)1 (6NeuAc)1 + (Man)3(GlcNAc)2	3491.31	Hy_a_F
(Hex)6 (HexNAc)2 (Fuc)3 (3-8NeuAc)2 + (Man)3(GlcNAc)2	3463.28	Hy_a_F
(Hex)6 (HexNAc)3 (Fuc)3 (6NeuAc)2 + (Man)3(GlcNAc)2	3722.42	Hy_a_F
(Hex)6 (HexNAc)3 (Fuc)3 (3-8NeuAc)1 (6NeuAc)1 + (Man)3(GlcNAc)2	3694.39	Hy_a_F
(Hex)6 (HexNAc)3 (Fuc)3 (3-8NeuAc)2 + (Man)3(GlcNAc)2	3666.36	Hy_a_F
(Hex)6 (HexNAc)4 (Fuc)3 (6NeuAc)2 + (Man)3(GlcNAc)2	3925.5	Hy_a_F
(Hex)6 (HexNAc)4 (Fuc)3 (3-8NeuAc)1 (6NeuAc)1 + (Man)3(GlcNAc)2	3897.47	Hy_a_F
(Hex)6 (HexNAc)4 (Fuc)3 (3-8NeuAc)2 + (Man)3(GlcNAc)2	3869.44	Hy_a_F
(Hex)6 (HexNAc)5 (Fuc)3 (6NeuAc)2 + (Man)3(GlcNAc)2	4128.58	Hy_a_F
(Hex)6 (HexNAc)5 (Fuc)3 (3-8NeuAc)1 (6NeuAc)1 + (Man)3(GlcNAc)2	4100.55	Hy_a_F
(Hex)6 (HexNAc)5 (Fuc)3 (3-8NeuAc)2 + (Man)3(GlcNAc)2	4072.52	Hy_a_F
(Hex)2 (HexNAc)3 (6NeuAc)2 (GlcA)1 + (Man)3(GlcNAc)2	2853.13	3b_a
(Hex)2 (HexNAc)3 (3-8NeuAc)1 (6NeuAc)1 (GlcA)1 + (Man)3(GlcNAc)2	2825.1	3b_a
(Hex)2 (HexNAc)3 (3-8NeuAc)2 (GlcA)1 + (Man)3(GlcNAc)2	2797.07	3b_a
(Hex)2 (HexNAc)4 (6NeuAc)2 (GlcA)1 + (Man)3(GlcNAc)2	3056.21	4bL_a
(Hex)2 (HexNAc)4 (3-8NeuAc)1 (6NeuAc)1 (GlcA)1 + (Man)3(GlcNAc)2	3028.18	4bL_a
(Hex)2 (HexNAc)4 (3-8NeuAc)2 (GlcA)1 + (Man)3(GlcNAc)2	3000.15	4bL_a
(Hex)2 (HexNAc)5 (6NeuAc)2 (GlcA)1 + (Man)3(GlcNAc)2	3259.29	5a
(Hex)2 (HexNAc)5 (3-8NeuAc)1 (6NeuAc)1 (GlcA)1 + (Man)3(GlcNAc)2	3231.26	5a
(Hex)2 (HexNAc)5 (3-8NeuAc)2 (GlcA)1 + (Man)3(GlcNAc)2	3203.23	5a
(Hex)3 (HexNAc)3 (6NeuAc)2 (GlcA)1 + (Man)3(GlcNAc)2	3015.18	3_a
(Hex)3 (HexNAc)3 (3-8NeuAc)1 (6NeuAc)1 (GlcA)1 + (Man)3(GlcNAc)2	2987.15	3_a
(Hex)3 (HexNAc)3 (3-8NeuAc)2 (GlcA)1 + (Man)3(GlcNAc)2	2959.12	3_a
(Hex)3 (HexNAc)4 (6NeuAc)2 (GlcA)1 + (Man)3(GlcNAc)2	3218.26	4b_a
(Hex)3 (HexNAc)4 (3-8NeuAc)1 (6NeuAc)1 (GlcA)1 + (Man)3(GlcNAc)2	3190.23	4b_a
(Hex)3 (HexNAc)4 (3-8NeuAc)2 (GlcA)1 + (Man)3(GlcNAc)2	3162.2	4b_a
(Hex)3 (HexNAc)5 (6NeuAc)2 (GlcA)1 + (Man)3(GlcNAc)2	3421.34	5a
(Hex)3 (HexNAc)5 (3-8NeuAc)1 (6NeuAc)1 (GlcA)1 + (Man)3(GlcNAc)2	3393.31	5a
(Hex)3 (HexNAc)5 (3-8NeuAc)2 (GlcA)1 + (Man)3(GlcNAc)2	3365.28	5a
(Hex)4 (HexNAc)3 (6NeuAc)2 (GlcA)1 + (Man)3(GlcNAc)2	3177.24	Hy_a
(Hex)4 (HexNAc)3 (3-8NeuAc)1 (6NeuAc)1 (GlcA)1 + (Man)3(GlcNAc)2	3149.2	Hy_a
(Hex)4 (HexNAc)3 (3-8NeuAc)2 (GlcA)1 + (Man)3(GlcNAc)2	3121.17	Hy_a
(Hex)4 (HexNAc)4 (6NeuAc)2 (GlcA)1 + (Man)3(GlcNAc)2	3380.32	4_a
(Hex)4 (HexNAc)4 (3-8NeuAc)1 (6NeuAc)1 (GlcA)1 + (Man)3(GlcNAc)2	3352.28	4_a
(Hex)4 (HexNAc)4 (3-8NeuAc)2 (GlcA)1 + (Man)3(GlcNAc)2	3324.25	4_a
(Hex)4 (HexNAc)5 (6NeuAc)2 (GlcA)1 + (Man)3(GlcNAc)2	3583.39	5a
(Hex)4 (HexNAc)5 (3-8NeuAc)1 (6NeuAc)1 (GlcA)1 + (Man)3(GlcNAc)2	3555.36	5a
(Hex)4 (HexNAc)5 (3-8NeuAc)2 (GlcA)1 + (Man)3(GlcNAc)2	3527.33	5a
(Hex)5 (HexNAc)3 (6NeuAc)2 (GlcA)1 + (Man)3(GlcNAc)2	3339.29	Hy_a
(Hex)5 (HexNAc)3 (3-8NeuAc)1 (6NeuAc)1 (GlcA)1 + (Man)3(GlcNAc)2	3311.26	Hy_a
(Hex)5 (HexNAc)3 (3-8NeuAc)2 (GlcA)1 + (Man)3(GlcNAc)2	3283.23	Hy_a
(Hex)5 (HexNAc)4 (6NeuAc)2 (GlcA)1 + (Man)3(GlcNAc)2	3542.37	Hy_a
(Hex)5 (HexNAc)4 (3-8NeuAc)1 (6NeuAc)1 (GlcA)1 + (Man)3(GlcNAc)2	3514.34	Hy_a
(Hex)5 (HexNAc)4 (3-8NeuAc)2 (GlcA)1 + (Man)3(GlcNAc)2	3486.31	Hy_a
(Hex)5 (HexNAc)5 (6NeuAc)2 (GlcA)1 + (Man)3(GlcNAc)2	3745.45	5a
(Hex)5 (HexNAc)5 (3-8NeuAc)1 (6NeuAc)1 (GlcA)1 + (Man)3(GlcNAc)2	3717.42	5a
(Hex)5 (HexNAc)5 (3-8NeuAc)2 (GlcA)1 + (Man)3(GlcNAc)2	3689.38	5a
(Hex)6 (HexNAc)3 (6NeuAc)2 (GlcA)1 + (Man)3(GlcNAc)2	3501.34	Hy_a
(Hex)6 (HexNAc)3 (3-8NeuAc)1 (6NeuAc)1 (GlcA)1 + (Man)3(GlcNAc)2	3473.31	Hy_a
(Hex)6 (HexNAc)3 (3-8NeuAc)2 (GlcA)1 + (Man)3(GlcNAc)2	3445.28	Hy_a
(Hex)6 (HexNAc)4 (6NeuAc)2 (GlcA)1 + (Man)3(GlcNAc)2	3704.42	Hy_a
(Hex)6 (HexNAc)4 (3-8NeuAc)1 (6NeuAc)1 (GlcA)1 + (Man)3(GlcNAc)2	3676.39	Hy_a
(Hex)6 (HexNAc)4 (3-8NeuAc)2 (GlcA)1 + (Man)3(GlcNAc)2	3648.36	Hy_a
(Hex)6 (HexNAc)5 (6NeuAc)2 (GlcA)1 + (Man)3(GlcNAc)2	3907.5	Hy_a
(Hex)6 (HexNAc)5 (3-8NeuAc)1 (6NeuAc)1 (GlcA)1 + (Man)3(GlcNAc)2	3879.47	Hy_a
(Hex)6 (HexNAc)5 (3-8NeuAc)2 (GlcA)1 + (Man)3(GlcNAc)2	3851.44	Hy_a
(Hex)2 (HexNAc)3 (Fuc)1 (6NeuAc)2 (GlcA)1 + (Man)3(GlcNAc)2	2999.19	3b_a_F
(Hex)2 (HexNAc)3 (Fuc)1 (3-8NeuAc)1 (6NeuAc)1 (GlcA)1 + (Man)3(GlcNAc)2	2971.16	3b_a_F
(Hex)2 (HexNAc)3 (Fuc)1 (3-8NeuAc)2 (GlcA)1 + (Man)3(GlcNAc)2	2943.13	3b_a_F
(Hex)2 (HexNAc)4 (Fuc)1 (6NeuAc)2 (GlcA)1 + (Man)3(GlcNAc)2	3202.27	4bL_a_F
(Hex)2 (HexNAc)4 (Fuc)1 (3-8NeuAc)1 (6NeuAc)1 (GlcA)1 + (Man)3(GlcNAc)2	3174.24	4bL_a_F
(Hex)2 (HexNAc)4 (Fuc)1 (3-8NeuAc)2 (GlcA)1 + (Man)3(GlcNAc)2	3146.2	4bL_a_F
(Hex)2 (HexNAc)5 (Fuc)1 (6NeuAc)2 (GlcA)1 + (Man)3(GlcNAc)2	3405.35	5a
(Hex)2 (HexNAc)5 (Fuc)1 (3-8NeuAc)1 (6NeuAc)1 (GlcA)1 + (Man)3(GlcNAc)2	3377.32	5a
(Hex)2 (HexNAc)5 (Fuc)1 (3-8NeuAc)2 (GlcA)1 + (Man)3(GlcNAc)2	3349.28	5a
(Hex)3 (HexNAc)3 (Fuc)1 (6NeuAc)2 (GlcA)1 + (Man)3(GlcNAc)2	3161.24	3_a_F
(Hex)3 (HexNAc)3 (Fuc)1 (3-8NeuAc)1 (6NeuAc)1 (GlcA)1 + (Man)3(GlcNAc)2	3133.21	3_a_F
(Hex)3 (HexNAc)3 (Fuc)1 (3-8NeuAc)2 (GlcA)1 + (Man)3(GlcNAc)2	3105.18	3_a_F
(Hex)3 (HexNAc)4 (Fuc)1 (6NeuAc)2 (GlcA)1 + (Man)3(GlcNAc)2	3364.32	4b_a_F
(Hex)3 (HexNAc)4 (Fuc)1 (3-8NeuAc)1 (6NeuAc)1 (GlcA)1 + (Man)3(GlcNAc)2	3336.29	4b_a_F
(Hex)3 (HexNAc)4 (Fuc)1 (3-8NeuAc)2 (GlcA)1 + (Man)3(GlcNAc)2	3308.26	4b_a_F
(Hex)3 (HexNAc)5 (Fuc)1 (6NeuAc)2 (GlcA)1 + (Man)3(GlcNAc)2	3567.4	5a
(Hex)3 (HexNAc)5 (Fuc)1 (3-8NeuAc)1 (6NeuAc)1 (GlcA)1 + (Man)3(GlcNAc)2	3539.37	5a
(Hex)3 (HexNAc)5 (Fuc)1 (3-8NeuAc)2 (GlcA)1 + (Man)3(GlcNAc)2	3511.34	5a
(Hex)4 (HexNAc)3 (Fuc)1 (6NeuAc)2 (GlcA)1 + (Man)3(GlcNAc)2	3323.29	Hy_a_F
(Hex)4 (HexNAc)3 (Fuc)1 (3-8NeuAc)1 (6NeuAc)1 (GlcA)1 + (Man)3(GlcNAc)2	3295.26	Hy_a_F
(Hex)4 (HexNAc)3 (Fuc)1 (3-8NeuAc)2 (GlcA)1 + (Man)3(GlcNAc)2	3267.23	Hy_a_F
(Hex)4 (HexNAc)4 (Fuc)1 (6NeuAc)2 (GlcA)1 + (Man)3(GlcNAc)2	3526.37	4_a_F
(Hex)4 (HexNAc)4 (Fuc)1 (3-8NeuAc)1 (6NeuAc)1 (GlcA)1 + (Man)3(GlcNAc)2	3498.34	4_a_F
(Hex)4 (HexNAc)4 (Fuc)1 (3-8NeuAc)2 (GlcA)1 + (Man)3(GlcNAc)2	3470.31	4_a_F
(Hex)4 (HexNAc)5 (Fuc)1 (6NeuAc)2 (GlcA)1 + (Man)3(GlcNAc)2	3729.45	5a
(Hex)4 (HexNAc)5 (Fuc)1 (3-8NeuAc)1 (6NeuAc)1 (GlcA)1 + (Man)3(GlcNAc)2	3701.42	5a
(Hex)4 (HexNAc)5 (Fuc)1 (3-8NeuAc)2 (GlcA)1 + (Man)3(GlcNAc)2	3673.39	5a
(Hex)5 (HexNAc)3 (Fuc)1 (6NeuAc)2 (GlcA)1 + (Man)3(GlcNAc)2	3485.35	Hy_a_F
(Hex)5 (HexNAc)3 (Fuc)1 (3-8NeuAc)1 (6NeuAc)1 (GlcA)1 + (Man)3(GlcNAc)2	3457.32	Hy_a_F
(Hex)5 (HexNAc)3 (Fuc)1 (3-8NeuAc)2 (GlcA)1 + (Man)3(GlcNAc)2	3429.28	Hy_a_F
(Hex)5 (HexNAc)4 (Fuc)1 (6NeuAc)2 (GlcA)1 + (Man)3(GlcNAc)2	3688.43	Hy_a_F
(Hex)5 (HexNAc)4 (Fuc)1 (3-8NeuAc)1 (6NeuAc)1 (GlcA)1 + (Man)3(GlcNAc)2	3660.39	Hy_a_F
(Hex)5 (HexNAc)4 (Fuc)1 (3-8NeuAc)2 (GlcA)1 + (Man)3(GlcNAc)2	3632.36	Hy_a_F
(Hex)5 (HexNAc)5 (Fuc)1 (6NeuAc)2 (GlcA)1 + (Man)3(GlcNAc)2	3891.51	5a
(Hex)5 (HexNAc)5 (Fuc)1 (3-8NeuAc)1 (6NeuAc)1 (GlcA)1 + (Man)3(GlcNAc)2	3863.47	5a
(Hex)5 (HexNAc)5 (Fuc)1 (3-8NeuAc)2 (GlcA)1 + (Man)3(GlcNAc)2	3835.44	5a
(Hex)6 (HexNAc)3 (Fuc)1 (6NeuAc)2 (GlcA)1 + (Man)3(GlcNAc)2	3647.4	Hy_a_F
(Hex)6 (HexNAc)3 (Fuc)1 (3-8NeuAc)1 (6NeuAc)1 (GlcA)1 + (Man)3(GlcNAc)2	3619.37	Hy_a_F
(Hex)6 (HexNAc)3 (Fuc)1 (3-8NeuAc)2 (GlcA)1 + (Man)3(GlcNAc)2	3591.34	Hy_a_F
(Hex)6 (HexNAc)4 (Fuc)1 (6NeuAc)2 (GlcA)1 + (Man)3(GlcNAc)2	3850.48	Hy_a_F
(Hex)6 (HexNAc)4 (Fuc)1 (3-8NeuAc)1 (6NeuAc)1 (GlcA)1 + (Man)3(GlcNAc)2	3822.45	Hy_a_F
(Hex)6 (HexNAc)4 (Fuc)1 (3-8NeuAc)2 (GlcA)1 + (Man)3(GlcNAc)2	3794.42	Hy_a_F
(Hex)6 (HexNAc)5 (Fuc)1 (6NeuAc)2 (GlcA)1 + (Man)3(GlcNAc)2	4053.56	Hy_a_F
(Hex)6 (HexNAc)5 (Fuc)1 (3-8NeuAc)1 (6NeuAc)1 (GlcA)1 + (Man)3(GlcNAc)2	4025.53	Hy_a_F
(Hex)6 (HexNAc)5 (Fuc)1 (3-8NeuAc)2 (GlcA)1 + (Man)3(GlcNAc)2	3997.5	Hy_a_F
(Hex)2 (HexNAc)3 (Fuc)2 (6NeuAc)2 (GlcA)1 + (Man)3(GlcNAc)2	3145.25	3b_a_F
(Hex)2 (HexNAc)3 (Fuc)2 (3-8NeuAc)1 (6NeuAc)1 (GlcA)1 + (Man)3(GlcNAc)2	3117.21	3b_a_F
(Hex)2 (HexNAc)3 (Fuc)2 (3-8NeuAc)2 (GlcA)1 + (Man)3(GlcNAc)2	3089.18	3b_a_F
(Hex)2 (HexNAc)4 (Fuc)2 (6NeuAc)2 (GlcA)1 + (Man)3(GlcNAc)2	3348.33	4bL_a_F
(Hex)2 (HexNAc)4 (Fuc)2 (3-8NeuAc)1 (6NeuAc)1 (GlcA)1 + (Man)3(GlcNAc)2	3320.29	4bL_a_F
(Hex)2 (HexNAc)4 (Fuc)2 (3-8NeuAc)2 (GlcA)1 + (Man)3(GlcNAc)2	3292.26	4bL_a_F
(Hex)2 (HexNAc)5 (Fuc)2 (6NeuAc)2 (GlcA)1 + (Man)3(GlcNAc)2	3551.4	5a
(Hex)2 (HexNAc)5 (Fuc)2 (3-8NeuAc)1 (6NeuAc)1 (GlcA)1 + (Man)3(GlcNAc)2	3523.37	5a
(Hex)2 (HexNAc)5 (Fuc)2 (3-8NeuAc)2 (GlcA)1 + (Man)3(GlcNAc)2	3495.34	5a
(Hex)3 (HexNAc)3 (Fuc)2 (6NeuAc)2 (GlcA)1 + (Man)3(GlcNAc)2	3307.3	3_a_F
(Hex)3 (HexNAc)3 (Fuc)2 (3-8NeuAc)1 (6NeuAc)1 (GlcA)1 + (Man)3(GlcNAc)2	3279.27	3_a_F
(Hex)3 (HexNAc)3 (Fuc)2 (3-8NeuAc)2 (GlcA)1 + (Man)3(GlcNAc)2	3251.24	3_a_F
(Hex)3 (HexNAc)4 (Fuc)2 (6NeuAc)2 (GlcA)1 + (Man)3(GlcNAc)2	3510.38	4b_a_F
(Hex)3 (HexNAc)4 (Fuc)2 (3-8NeuAc)1 (6NeuAc)1 (GlcA)1 + (Man)3(GlcNAc)2	3482.35	4b_a_F
(Hex)3 (HexNAc)4 (Fuc)2 (3-8NeuAc)2 (GlcA)1 + (Man)3(GlcNAc)2	3454.32	4b_a_F
(Hex)3 (HexNAc)5 (Fuc)2 (6NeuAc)2 (GlcA)1 + (Man)3(GlcNAc)2	3713.46	5a
(Hex)3 (HexNAc)5 (Fuc)2 (3-8NeuAc)1 (6NeuAc)1 (GlcA)1 + (Man)3(GlcNAc)2	3685.43	5a
(Hex)3 (HexNAc)5 (Fuc)2 (3-8NeuAc)2 (GlcA)1 + (Man)3(GlcNAc)2	3657.39	5a
(Hex)4 (HexNAc)3 (Fuc)2 (6NeuAc)2 (GlcA)1 + (Man)3(GlcNAc)2	3469.35	Hy_a_F
(Hex)4 (HexNAc)3 (Fuc)2 (3-8NeuAc)1 (6NeuAc)1 (GlcA)1 + (Man)3(GlcNAc)2	3441.32	Hy_a_F
(Hex)4 (HexNAc)3 (Fuc)2 (3-8NeuAc)2 (GlcA)1 + (Man)3(GlcNAc)2	3413.29	Hy_a_F
(Hex)4 (HexNAc)4 (Fuc)2 (6NeuAc)2 (GlcA)1 + (Man)3(GlcNAc)2	3672.43	4_a_F
(Hex)4 (HexNAc)4 (Fuc)2 (3-8NeuAc)1 (6NeuAc)1 (GlcA)1 + (Man)3(GlcNAc)2	3644.4	4_a_F
(Hex)4 (HexNAc)4 (Fuc)2 (3-8NeuAc)2 (GlcA)1 + (Man)3(GlcNAc)2	3616.37	4_a_F
(Hex)4 (HexNAc)5 (Fuc)2 (6NeuAc)2 (GlcA)1 + (Man)3(GlcNAc)2	3875.51	5a
(Hex)4 (HexNAc)5 (Fuc)2 (3-8NeuAc)1 (6NeuAc)1 (GlcA)1 + (Man)3(GlcNAc)2	3847.48	5a
(Hex)4 (HexNAc)5 (Fuc)2 (3-8NeuAc)2 (GlcA)1 + (Man)3(GlcNAc)2	3819.45	5a
(Hex)5 (HexNAc)3 (Fuc)2 (6NeuAc)2 (GlcA)1 + (Man)3(GlcNAc)2	3631.4	Hy_a_F
(Hex)5 (HexNAc)3 (Fuc)2 (3-8NeuAc)1 (6NeuAc)1 (GlcA)1 + (Man)3(GlcNAc)2	3603.37	Hy_a_F
(Hex)5 (HexNAc)3 (Fuc)2 (3-8NeuAc)2 (GlcA)1 + (Man)3(GlcNAc)2	3575.34	Hy_a_F
(Hex)5 (HexNAc)4 (Fuc)2 (6NeuAc)2 (GlcA)1 + (Man)3(GlcNAc)2	3834.48	Hy_a_F
(Hex)5 (HexNAc)4 (Fuc)2 (3-8NeuAc)1 (6NeuAc)1 (GlcA)1 + (Man)3(GlcNAc)2	3806.45	Hy_a_F
(Hex)5 (HexNAc)4 (Fuc)2 (3-8NeuAc)2 (GlcA)1 + (Man)3(GlcNAc)2	3778.42	Hy_a_F
(Hex)5 (HexNAc)5 (Fuc)2 (6NeuAc)2 (GlcA)1 + (Man)3(GlcNAc)2	4037.56	5a
(Hex)5 (HexNAc)5 (Fuc)2 (3-8NeuAc)1 (6NeuAc)1 (GlcA)1 + (Man)3(GlcNAc)2	4009.53	5a
(Hex)5 (HexNAc)5 (Fuc)2 (3-8NeuAc)2 (GlcA)1 + (Man)3(GlcNAc)2	3981.5	5a
(Hex)6 (HexNAc)3 (Fuc)2 (6NeuAc)2 (GlcA)1 + (Man)3(GlcNAc)2	3793.46	Hy_a_F
(Hex)6 (HexNAc)3 (Fuc)2 (3-8NeuAc)1 (6NeuAc)1 (GlcA)1 + (Man)3(GlcNAc)2	3765.43	Hy_a_F
(Hex)6 (HexNAc)3 (Fuc)2 (3-8NeuAc)2 (GlcA)1 + (Man)3(GlcNAc)2	3737.39	Hy_a_F
(Hex)6 (HexNAc)4 (Fuc)2 (6NeuAc)2 (GlcA)1 + (Man)3(GlcNAc)2	3996.54	Hy_a_F
(Hex)6 (HexNAc)4 (Fuc)2 (3-8NeuAc)1 (6NeuAc)1 (GlcA)1 + (Man)3(GlcNAc)2	3968.51	Hy_a_F
(Hex)6 (HexNAc)4 (Fuc)2 (3-8NeuAc)2 (GlcA)1 + (Man)3(GlcNAc)2	3940.47	Hy_a_F
(Hex)6 (HexNAc)5 (Fuc)2 (6NeuAc)2 (GlcA)1 + (Man)3(GlcNAc)2	4199.62	Hy_a_F
(Hex)6 (HexNAc)5 (Fuc)2 (3-8NeuAc)1 (6NeuAc)1 (GlcA)1 + (Man)3(GlcNAc)2	4171.58	Hy_a_F
(Hex)6 (HexNAc)5 (Fuc)2 (3-8NeuAc)2 (GlcA)1 + (Man)3(GlcNAc)2	4143.55	Hy_a_F
(Hex)2 (HexNAc)3 (Fuc)3 (6NeuAc)2 (GlcA)1 + (Man)3(GlcNAc)2	3291.3	3b_a_F
(Hex)2 (HexNAc)3 (Fuc)3 (3-8NeuAc)1 (6NeuAc)1 (GlcA)1 + (Man)3(GlcNAc)2	3263.27	3b_a_F
(Hex)2 (HexNAc)3 (Fuc)3 (3-8NeuAc)2 (GlcA)1 + (Man)3(GlcNAc)2	3235.24	3b_a_F
(Hex)2 (HexNAc)4 (Fuc)3 (6NeuAc)2 (GlcA)1 + (Man)3(GlcNAc)2	3494.38	4bL_a_F
(Hex)2 (HexNAc)4 (Fuc)3 (3-8NeuAc)1 (6NeuAc)1 (GlcA)1 + (Man)3(GlcNAc)2	3466.35	4bL_a_F
(Hex)2 (HexNAc)4 (Fuc)3 (3-8NeuAc)2 (GlcA)1 + (Man)3(GlcNAc)2	3438.32	4bL_a_F
(Hex)2 (HexNAc)5 (Fuc)3 (6NeuAc)2 (GlcA)1 + (Man)3(GlcNAc)2	3697.46	5a
(Hex)2 (HexNAc)5 (Fuc)3 (3-8NeuAc)1 (6NeuAc)1 (GlcA)1 + (Man)3(GlcNAc)2	3669.43	5a
(Hex)2 (HexNAc)5 (Fuc)3 (3-8NeuAc)2 (GlcA)1 + (Man)3(GlcNAc)2	3641.4	5a
(Hex)3 (HexNAc)3 (Fuc)3 (6NeuAc)2 (GlcA)1 + (Man)3(GlcNAc)2	3453.36	3_a_F
(Hex)3 (HexNAc)3 (Fuc)3 (3-8NeuAc)1 (6NeuAc)1 (GlcA)1 + (Man)3(GlcNAc)2	3425.33	3_a_F
(Hex)3 (HexNAc)3 (Fuc)3 (3-8NeuAc)2 (GlcA)1 + (Man)3(GlcNAc)2	3397.29	3_a_F
(Hex)3 (HexNAc)4 (Fuc)3 (6NeuAc)2 (GlcA)1 + (Man)3(GlcNAc)2	3656.44	4b_a_F
(Hex)3 (HexNAc)4 (Fuc)3 (3-8NeuAc)1 (6NeuAc)1 (GlcA)1 + (Man)3(GlcNAc)2	3628.4	4b_a_F
(Hex)3 (HexNAc)4 (Fuc)3 (3-8NeuAc)2 (GlcA)1 + (Man)3(GlcNAc)2	3600.37	4b_a_F
(Hex)3 (HexNAc)5 (Fuc)3 (6NeuAc)2 (GlcA)1 + (Man)3(GlcNAc)2	3859.52	5a
(Hex)3 (HexNAc)5 (Fuc)3 (3-8NeuAc)1 (6NeuAc)1 (GlcA)1 + (Man)3(GlcNAc)2	3831.48	5a
(Hex)3 (HexNAc)5 (Fuc)3 (3-8NeuAc)2 (GlcA)1 + (Man)3(GlcNAc)2	3803.45	5a
(Hex)4 (HexNAc)3 (Fuc)3 (6NeuAc)2 (GlcA)1 + (Man)3(GlcNAc)2	3615.41	Hy_a_F
(Hex)4 (HexNAc)3 (Fuc)3 (3-8NeuAc)1 (6NeuAc)1 (GlcA)1 + (Man)3(GlcNAc)2	3587.38	Hy_a_F
(Hex)4 (HexNAc)3 (Fuc)3 (3-8NeuAc)2 (GlcA)1 + (Man)3(GlcNAc)2	3559.35	Hy_a_F
(Hex)4 (HexNAc)4 (Fuc)3 (6NeuAc)2 (GlcA)1 + (Man)3(GlcNAc)2	3818.49	4_a_F
(Hex)4 (HexNAc)4 (Fuc)3 (3-8NeuAc)1 (6NeuAc)1 (GlcA)1 + (Man)3(GlcNAc)2	3790.46	4_a_F
(Hex)4 (HexNAc)4 (Fuc)3 (3-8NeuAc)2 (GlcA)1 + (Man)3(GlcNAc)2	3762.43	4_a_F
(Hex)4 (HexNAc)5 (Fuc)3 (6NeuAc)2 (GlcA)1 + (Man)3(GlcNAc)2	4021.57	5a
(Hex)4 (HexNAc)5 (Fuc)3 (3-8NeuAc)1 (6NeuAc)1 (GlcA)1 + (Man)3(GlcNAc)2	3993.54	5a
(Hex)4 (HexNAc)5 (Fuc)3 (3-8NeuAc)2 (GlcA)1 + (Man)3(GlcNAc)2	3965.51	5a
(Hex)5 (HexNAc)3 (Fuc)3 (6NeuAc)2 (GlcA)1 + (Man)3(GlcNAc)2	3777.46	Hy_a_F
(Hex)5 (HexNAc)3 (Fuc)3 (3-8NeuAc)1 (6NeuAc)1 (GlcA)1 + (Man)3(GlcNAc)2	3749.43	Hy_a_F
(Hex)5 (HexNAc)3 (Fuc)3 (3-8NeuAc)2 (GlcA)1 + (Man)3(GlcNAc)2	3721.4	Hy_a_F
(Hex)5 (HexNAc)4 (Fuc)3 (6NeuAc)2 (GlcA)1 + (Man)3(GlcNAc)2	3980.54	Hy_a_F
(Hex)5 (HexNAc)4 (Fuc)3 (3-8NeuAc)1 (6NeuAc)1 (GlcA)1 + (Man)3(GlcNAc)2	3952.51	Hy_a_F
(Hex)5 (HexNAc)4 (Fuc)3 (3-8NeuAc)2 (GlcA)1 + (Man)3(GlcNAc)2	3924.48	Hy_a_F
(Hex)5 (HexNAc)5 (Fuc)3 (6NeuAc)2 (GlcA)1 + (Man)3(GlcNAc)2	4183.62	5a
(Hex)5 (HexNAc)5 (Fuc)3 (3-8NeuAc)1 (6NeuAc)1 (GlcA)1 + (Man)3(GlcNAc)2	4155.59	5a
(Hex)5 (HexNAc)5 (Fuc)3 (3-8NeuAc)2 (GlcA)1 + (Man)3(GlcNAc)2	4127.56	5a
(Hex)6 (HexNAc)3 (Fuc)3 (6NeuAc)2 (GlcA)1 + (Man)3(GlcNAc)2	3939.52	Hy_a_F
(Hex)6 (HexNAc)3 (Fuc)3 (3-8NeuAc)1 (6NeuAc)1 (GlcA)1 + (Man)3(GlcNAc)2	3911.48	Hy_a_F
(Hex)6 (HexNAc)3 (Fuc)3 (3-8NeuAc)2 (GlcA)1 + (Man)3(GlcNAc)2	3883.45	Hy_a_F
(Hex)6 (HexNAc)4 (Fuc)3 (6NeuAc)2 (GlcA)1 + (Man)3(GlcNAc)2	4142.59	Hy_a_F
(Hex)6 (HexNAc)4 (Fuc)3 (3-8NeuAc)1 (6NeuAc)1 (GlcA)1 + (Man)3(GlcNAc)2	4114.56	Hy_a_F
(Hex)6 (HexNAc)4 (Fuc)3 (3-8NeuAc)2 (GlcA)1 + (Man)3(GlcNAc)2	4086.53	Hy_a_F
(Hex)6 (HexNAc)5 (Fuc)3 (6NeuAc)2 (GlcA)1 + (Man)3(GlcNAc)2	4345.67	Hy_a_F
(Hex)6 (HexNAc)5 (Fuc)3 (3-8NeuAc)1 (6NeuAc)1 (GlcA)1 + (Man)3(GlcNAc)2	4317.64	Hy_a_F
(Hex)6 (HexNAc)5 (Fuc)3 (3-8NeuAc)2 (GlcA)1 + (Man)3(GlcNAc)2	4289.61	Hy_a_F
(Hex)2 (HexNAc)3 (6NeuAc)3 + (Man)3(GlcNAc)2	2968.19	3b_a
(Hex)2 (HexNAc)3 (3-8NeuAc)1 (6NeuAc)2 + (Man)3(GlcNAc)2	2940.16	3b_a
(Hex)2 (HexNAc)3 (3-8NeuAc)2 (6NeuAc)1 + (Man)3(GlcNAc)2	2912.13	3b_a
(Hex)2 (HexNAc)3 (3-8NeuAc)3 + (Man)3(GlcNAc)2	2884.1	3b_a
(Hex)2 (HexNAc)4 (6NeuAc)3 + (Man)3(GlcNAc)2	3171.27	4bL_a
(Hex)2 (HexNAc)4 (3-8NeuAc)1 (6NeuAc)2 + (Man)3(GlcNAc)2	3143.24	4bL_a
(Hex)2 (HexNAc)4 (3-8NeuAc)2 (6NeuAc)1 + (Man)3(GlcNAc)2	3115.21	4bL_a
(Hex)2 (HexNAc)4 (3-8NeuAc)3 + (Man)3(GlcNAc)2	3087.18	4bL_a
(Hex)2 (HexNAc)5 (6NeuAc)3 + (Man)3(GlcNAc)2	3374.35	5a
(Hex)2 (HexNAc)5 (3-8NeuAc)1 (6NeuAc)2 + (Man)3(GlcNAc)2	3346.32	5a
(Hex)2 (HexNAc)5 (3-8NeuAc)2 (6NeuAc)1 + (Man)3(GlcNAc)2	3318.29	5a
(Hex)2 (HexNAc)5 (3-8NeuAc)3 + (Man)3(GlcNAc)2	3290.26	5a
(Hex)3 (HexNAc)3 (6NeuAc)3 + (Man)3(GlcNAc)2	3130.25	3_a
(Hex)3 (HexNAc)3 (3-8NeuAc)1 (6NeuAc)2 + (Man)3(GlcNAc)2	3102.22	3_a
(Hex)3 (HexNAc)3 (3-8NeuAc)2 (6NeuAc)1 + (Man)3(GlcNAc)2	3074.18	3_a
(Hex)3 (HexNAc)3 (3-8NeuAc)3 + (Man)3(GlcNAc)2	3046.15	3_a
(Hex)3 (HexNAc)4 (6NeuAc)3 + (Man)3(GlcNAc)2	3333.33	4b_a
(Hex)3 (HexNAc)4 (3-8NeuAc)1 (6NeuAc)2 + (Man)3(GlcNAc)2	3305.29	4b_a
(Hex)3 (HexNAc)4 (3-8NeuAc)2 (6NeuAc)1 + (Man)3(GlcNAc)2	3277.26	4b_a
(Hex)3 (HexNAc)4 (3-8NeuAc)3 + (Man)3(GlcNAc)2	3249.23	4b_a
(Hex)3 (HexNAc)5 (6NeuAc)3 + (Man)3(GlcNAc)2	3536.41	5a
(Hex)3 (HexNAc)5 (3-8NeuAc)1 (6NeuAc)2 + (Man)3(GlcNAc)2	3508.37	5a
(Hex)3 (HexNAc)5 (3-8NeuAc)2 (6NeuAc)1 + (Man)3(GlcNAc)2	3480.34	5a
(Hex)3 (HexNAc)5 (3-8NeuAc)3 + (Man)3(GlcNAc)2	3452.31	5a
(Hex)4 (HexNAc)3 (6NeuAc)3 + (Man)3(GlcNAc)2	3292.3	Hy_a
(Hex)4 (HexNAc)3 (3-8NeuAc)1 (6NeuAc)2 + (Man)3(GlcNAc)2	3264.27	Hy_a
(Hex)4 (HexNAc)3 (3-8NeuAc)2 (6NeuAc)1 + (Man)3(GlcNAc)2	3236.24	Hy_a
(Hex)4 (HexNAc)3 (3-8NeuAc)3 + (Man)3(GlcNAc)2	3208.21	Hy_a
(Hex)4 (HexNAc)4 (6NeuAc)3 + (Man)3(GlcNAc)2	3495.38	4_a
(Hex)4 (HexNAc)4 (3-8NeuAc)1 (6NeuAc)2 + (Man)3(GlcNAc)2	3467.35	4_a
(Hex)4 (HexNAc)4 (3-8NeuAc)2 (6NeuAc)1 + (Man)3(GlcNAc)2	3439.32	4_a
(Hex)4 (HexNAc)4 (3-8NeuAc)3 + (Man)3(GlcNAc)2	3411.28	4_a
(Hex)4 (HexNAc)5 (6NeuAc)3 + (Man)3(GlcNAc)2	3698.46	5a
(Hex)4 (HexNAc)5 (3-8NeuAc)1 (6NeuAc)2 + (Man)3(GlcNAc)2	3670.43	5a
(Hex)4 (HexNAc)5 (3-8NeuAc)2 (6NeuAc)1 + (Man)3(GlcNAc)2	3642.4	5a
(Hex)4 (HexNAc)5 (3-8NeuAc)3 + (Man)3(GlcNAc)2	3614.36	5a
(Hex)5 (HexNAc)3 (6NeuAc)3 + (Man)3(GlcNAc)2	3454.35	Hy_a
(Hex)5 (HexNAc)3 (3-8NeuAc)1 (6NeuAc)2 + (Man)3(GlcNAc)2	3426.32	Hy_a
(Hex)5 (HexNAc)3 (3-8NeuAc)2 (6NeuAc)1 + (Man)3(GlcNAc)2	3398.29	Hy_a
(Hex)5 (HexNAc)3 (3-8NeuAc)3 + (Man)3(GlcNAc)2	3370.26	Hy_a
(Hex)5 (HexNAc)4 (6NeuAc)3 + (Man)3(GlcNAc)2	3657.43	Hy_a
(Hex)5 (HexNAc)4 (3-8NeuAc)1 (6NeuAc)2 + (Man)3(GlcNAc)2	3629.4	Hy_a
(Hex)5 (HexNAc)4 (3-8NeuAc)2 (6NeuAc)1 + (Man)3(GlcNAc)2	3601.37	Hy_a
(Hex)5 (HexNAc)4 (3-8NeuAc)3 + (Man)3(GlcNAc)2	3573.34	Hy_a
(Hex)5 (HexNAc)5 (6NeuAc)3 + (Man)3(GlcNAc)2	3860.51	5a
(Hex)5 (HexNAc)5 (3-8NeuAc)1 (6NeuAc)2 + (Man)3(GlcNAc)2	3832.48	5a
(Hex)5 (HexNAc)5 (3-8NeuAc)2 (6NeuAc)1 + (Man)3(GlcNAc)2	3804.45	5a
(Hex)5 (HexNAc)5 (3-8NeuAc)3 + (Man)3(GlcNAc)2	3776.42	5a
(Hex)6 (HexNAc)3 (6NeuAc)3 + (Man)3(GlcNAc)2	3616.4	Hy_a
(Hex)6 (HexNAc)3 (3-8NeuAc)1 (6NeuAc)2 + (Man)3(GlcNAc)2	3588.37	Hy_a
(Hex)6 (HexNAc)3 (3-8NeuAc)2 (6NeuAc)1 + (Man)3(GlcNAc)2	3560.34	Hy_a
(Hex)6 (HexNAc)3 (3-8NeuAc)3 + (Man)3(GlcNAc)2	3532.31	Hy_a
(Hex)6 (HexNAc)4 (6NeuAc)3 + (Man)3(GlcNAc)2	3819.48	Hy_a
(Hex)6 (HexNAc)4 (3-8NeuAc)1 (6NeuAc)2 + (Man)3(GlcNAc)2	3791.45	Hy_a
(Hex)6 (HexNAc)4 (3-8NeuAc)2 (6NeuAc)1 + (Man)3(GlcNAc)2	3763.42	Hy_a
(Hex)6 (HexNAc)4 (3-8NeuAc)3 + (Man)3(GlcNAc)2	3735.39	Hy_a
(Hex)6 (HexNAc)5 (6NeuAc)3 + (Man)3(GlcNAc)2	4022.56	Hy_a
(Hex)6 (HexNAc)5 (3-8NeuAc)1 (6NeuAc)2 + (Man)3(GlcNAc)2	3994.53	Hy_a
(Hex)6 (HexNAc)5 (3-8NeuAc)2 (6NeuAc)1 + (Man)3(GlcNAc)2	3966.5	Hy_a
(Hex)6 (HexNAc)5 (3-8NeuAc)3 + (Man)3(GlcNAc)2	3938.47	Hy_a
(Hex)2 (HexNAc)3 (Fuc)1 (6NeuAc)3 + (Man)3(GlcNAc)2	3114.25	3b_a_F
(Hex)2 (HexNAc)3 (Fuc)1 (3-8NeuAc)1 (6NeuAc)2 + (Man)3(GlcNAc)2	3086.22	3b_a_F
(Hex)2 (HexNAc)3 (Fuc)1 (3-8NeuAc)2 (6NeuAc)1 + (Man)3(GlcNAc)2	3058.19	3b_a_F
(Hex)2 (HexNAc)3 (Fuc)1 (3-8NeuAc)3 + (Man)3(GlcNAc)2	3030.16	3b_a_F
(Hex)2 (HexNAc)4 (Fuc)1 (6NeuAc)3 + (Man)3(GlcNAc)2	3317.33	4bL_a_F
(Hex)2 (HexNAc)4 (Fuc)1 (3-8NeuAc)1 (6NeuAc)2 + (Man)3(GlcNAc)2	3289.3	4bL_a_F
(Hex)2 (HexNAc)4 (Fuc)1 (3-8NeuAc)2 (6NeuAc)1 + (Man)3(GlcNAc)2	3261.27	4bL_a_F
(Hex)2 (HexNAc)4 (Fuc)1 (3-8NeuAc)3 + (Man)3(GlcNAc)2	3233.24	4bL_a_F
(Hex)2 (HexNAc)5 (Fuc)1 (6NeuAc)3 + (Man)3(GlcNAc)2	3520.41	5a
(Hex)2 (HexNAc)5 (Fuc)1 (3-8NeuAc)1 (6NeuAc)2 + (Man)3(GlcNAc)2	3492.38	5a
(Hex)2 (HexNAc)5 (Fuc)1 (3-8NeuAc)2 (6NeuAc)1 + (Man)3(GlcNAc)2	3464.35	5a
(Hex)2 (HexNAc)5 (Fuc)1 (3-8NeuAc)3 + (Man)3(GlcNAc)2	3436.32	5a
(Hex)3 (HexNAc)3 (Fuc)1 (6NeuAc)3 + (Man)3(GlcNAc)2	3276.3	3_a_F
(Hex)3 (HexNAc)3 (Fuc)1 (3-8NeuAc)1 (6NeuAc)2 + (Man)3(GlcNAc)2	3248.27	3_a_F
(Hex)3 (HexNAc)3 (Fuc)1 (3-8NeuAc)2 (6NeuAc)1 + (Man)3(GlcNAc)2	3220.24	3_a_F
(Hex)3 (HexNAc)3 (Fuc)1 (3-8NeuAc)3 + (Man)3(GlcNAc)2	3192.21	3_a_F
(Hex)3 (HexNAc)4 (Fuc)1 (6NeuAc)3 + (Man)3(GlcNAc)2	3479.38	4b_a_F
(Hex)3 (HexNAc)4 (Fuc)1 (3-8NeuAc)1 (6NeuAc)2 + (Man)3(GlcNAc)2	3451.35	4b_a_F
(Hex)3 (HexNAc)4 (Fuc)1 (3-8NeuAc)2 (6NeuAc)1 + (Man)3(GlcNAc)2	3423.32	4b_a_F
(Hex)3 (HexNAc)4 (Fuc)1 (3-8NeuAc)3 + (Man)3(GlcNAc)2	3395.29	4b_a_F
(Hex)3 (HexNAc)5 (Fuc)1 (6NeuAc)3 + (Man)3(GlcNAc)2	3682.46	5a
(Hex)3 (HexNAc)5 (Fuc)1 (3-8NeuAc)1 (6NeuAc)2 + (Man)3(GlcNAc)2	3654.43	5a
(Hex)3 (HexNAc)5 (Fuc)1 (3-8NeuAc)2 (6NeuAc)1 + (Man)3(GlcNAc)2	3626.4	5a
(Hex)3 (HexNAc)5 (Fuc)1 (3-8NeuAc)3 + (Man)3(GlcNAc)2	3598.37	5a
(Hex)4 (HexNAc)3 (Fuc)1 (6NeuAc)3 + (Man)3(GlcNAc)2	3438.36	Hy_a_F
(Hex)4 (HexNAc)3 (Fuc)1 (3-8NeuAc)1 (6NeuAc)2 + (Man)3(GlcNAc)2	3410.33	Hy_a_F
(Hex)4 (HexNAc)3 (Fuc)1 (3-8NeuAc)2 (6NeuAc)1 + (Man)3(GlcNAc)2	3382.29	Hy_a_F
(Hex)4 (HexNAc)3 (Fuc)1 (3-8NeuAc)3 + (Man)3(GlcNAc)2	3354.26	Hy_a_F
(Hex)4 (HexNAc)4 (Fuc)1 (6NeuAc)3 + (Man)3(GlcNAc)2	3641.44	4_a_F
(Hex)4 (HexNAc)4 (Fuc)1 (3-8NeuAc)1 (6NeuAc)2 + (Man)3(GlcNAc)2	3613.41	4_a_F
(Hex)4 (HexNAc)4 (Fuc)1 (3-8NeuAc)2 (6NeuAc)1 + (Man)3(GlcNAc)2	3585.37	4_a_F
(Hex)4 (HexNAc)4 (Fuc)1 (3-8NeuAc)3 + (Man)3(GlcNAc)2	3557.34	4_a_F
(Hex)4 (HexNAc)5 (Fuc)1 (6NeuAc)3 + (Man)3(GlcNAc)2	3844.52	5a
(Hex)4 (HexNAc)5 (Fuc)1 (3-8NeuAc)1 (6NeuAc)2 + (Man)3(GlcNAc)2	3816.48	5a
(Hex)4 (HexNAc)5 (Fuc)1 (3-8NeuAc)2 (6NeuAc)1 + (Man)3(GlcNAc)2	3788.45	5a
(Hex)4 (HexNAc)5 (Fuc)1 (3-8NeuAc)3 + (Man)3(GlcNAc)2	3760.42	5a
(Hex)5 (HexNAc)3 (Fuc)1 (6NeuAc)3 + (Man)3(GlcNAc)2	3600.41	Hy_a_F
(Hex)5 (HexNAc)3 (Fuc)1 (3-8NeuAc)1 (6NeuAc)2 + (Man)3(GlcNAc)2	3572.38	Hy_a_F
(Hex)5 (HexNAc)3 (Fuc)1 (3-8NeuAc)2 (6NeuAc)1 + (Man)3(GlcNAc)2	3544.35	Hy_a_F
(Hex)5 (HexNAc)3 (Fuc)1 (3-8NeuAc)3 + (Man)3(GlcNAc)2	3516.32	Hy_a_F
(Hex)5 (HexNAc)4 (Fuc)1 (6NeuAc)3 + (Man)3(GlcNAc)2	3803.49	Hy_a_F
(Hex)5 (HexNAc)4 (Fuc)1 (3-8NeuAc)1 (6NeuAc)2 + (Man)3(GlcNAc)2	3775.46	Hy_a_F
(Hex)5 (HexNAc)4 (Fuc)1 (3-8NeuAc)2 (6NeuAc)1 + (Man)3(GlcNAc)2	3747.43	Hy_a_F
(Hex)5 (HexNAc)4 (Fuc)1 (3-8NeuAc)3 + (Man)3(GlcNAc)2	3719.4	Hy_a_F
(Hex)5 (HexNAc)5 (Fuc)1 (6NeuAc)3 + (Man)3(GlcNAc)2	4006.57	5a
(Hex)5 (HexNAc)5 (Fuc)1 (3-8NeuAc)1 (6NeuAc)2 + (Man)3(GlcNAc)2	3978.54	5a
(Hex)5 (HexNAc)5 (Fuc)1 (3-8NeuAc)2 (6NeuAc)1 + (Man)3(GlcNAc)2	3950.51	5a
(Hex)5 (HexNAc)5 (Fuc)1 (3-8NeuAc)3 + (Man)3(GlcNAc)2	3922.47	5a
(Hex)6 (HexNAc)3 (Fuc)1 (6NeuAc)3 + (Man)3(GlcNAc)2	3762.46	Hy_a_F
(Hex)6 (HexNAc)3 (Fuc)1 (3-8NeuAc)1 (6NeuAc)2 + (Man)3(GlcNAc)2	3734.43	Hy_a_F
(Hex)6 (HexNAc)3 (Fuc)1 (3-8NeuAc)2 (6NeuAc)1 + (Man)3(GlcNAc)2	3706.4	Hy_a_F
(Hex)6 (HexNAc)3 (Fuc)1 (3-8NeuAc)3 + (Man)3(GlcNAc)2	3678.37	Hy_a_F
(Hex)6 (HexNAc)4 (Fuc)1 (6NeuAc)3 + (Man)3(GlcNAc)2	3965.54	Hy_a_F
(Hex)6 (HexNAc)4 (Fuc)1 (3-8NeuAc)1 (6NeuAc)2 + (Man)3(GlcNAc)2	3937.51	Hy_a_F
(Hex)6 (HexNAc)4 (Fuc)1 (3-8NeuAc)2 (6NeuAc)1 + (Man)3(GlcNAc)2	3909.48	Hy_a_F
(Hex)6 (HexNAc)4 (Fuc)1 (3-8NeuAc)3 + (Man)3(GlcNAc)2	3881.45	Hy_a_F
(Hex)6 (HexNAc)5 (Fuc)1 (6NeuAc)3 + (Man)3(GlcNAc)2	4168.62	Hy_a_F
(Hex)6 (HexNAc)5 (Fuc)1 (3-8NeuAc)1 (6NeuAc)2 + (Man)3(GlcNAc)2	4140.59	Hy_a_F
(Hex)6 (HexNAc)5 (Fuc)1 (3-8NeuAc)2 (6NeuAc)1 + (Man)3(GlcNAc)2	4112.56	Hy_a_F
(Hex)6 (HexNAc)5 (Fuc)1 (3-8NeuAc)3 + (Man)3(GlcNAc)2	4084.53	Hy_a_F
(Hex)2 (HexNAc)3 (Fuc)2 (6NeuAc)3 + (Man)3(GlcNAc)2	3260.31	3b_a_F
(Hex)2 (HexNAc)3 (Fuc)2 (3-8NeuAc)1 (6NeuAc)2 + (Man)3(GlcNAc)2	3232.28	3b_a_F
(Hex)2 (HexNAc)3 (Fuc)2 (3-8NeuAc)2 (6NeuAc)1 + (Man)3(GlcNAc)2	3204.25	3b_a_F
(Hex)2 (HexNAc)3 (Fuc)2 (3-8NeuAc)3 + (Man)3(GlcNAc)2	3176.22	3b_a_F
(Hex)2 (HexNAc)4 (Fuc)2 (6NeuAc)3 + (Man)3(GlcNAc)2	3463.39	4bL_a_F
(Hex)2 (HexNAc)4 (Fuc)2 (3-8NeuAc)1 (6NeuAc)2 + (Man)3(GlcNAc)2	3435.36	4bL_a_F
(Hex)2 (HexNAc)4 (Fuc)2 (3-8NeuAc)2 (6NeuAc)1 + (Man)3(GlcNAc)2	3407.33	4bL_a_F
(Hex)2 (HexNAc)4 (Fuc)2 (3-8NeuAc)3 + (Man)3(GlcNAc)2	3379.29	4bL_a_F
(Hex)2 (HexNAc)5 (Fuc)2 (6NeuAc)3 + (Man)3(GlcNAc)2	3666.47	5a
(Hex)2 (HexNAc)5 (Fuc)2 (3-8NeuAc)1 (6NeuAc)2 + (Man)3(GlcNAc)2	3638.44	5a
(Hex)2 (HexNAc)5 (Fuc)2 (3-8NeuAc)2 (6NeuAc)1 + (Man)3(GlcNAc)2	3610.41	5a
(Hex)2 (HexNAc)5 (Fuc)2 (3-8NeuAc)3 + (Man)3(GlcNAc)2	3582.37	5a
(Hex)3 (HexNAc)3 (Fuc)2 (6NeuAc)3 + (Man)3(GlcNAc)2	3422.36	3_a_F
(Hex)3 (HexNAc)3 (Fuc)2 (3-8NeuAc)1 (6NeuAc)2 + (Man)3(GlcNAc)2	3394.33	3_a_F
(Hex)3 (HexNAc)3 (Fuc)2 (3-8NeuAc)2 (6NeuAc)1 + (Man)3(GlcNAc)2	3366.3	3_a_F
(Hex)3 (HexNAc)3 (Fuc)2 (3-8NeuAc)3 + (Man)3(GlcNAc)2	3338.27	3_a_F
(Hex)3 (HexNAc)4 (Fuc)2 (6NeuAc)3 + (Man)3(GlcNAc)2	3625.44	4b_a_F
(Hex)3 (HexNAc)4 (Fuc)2 (3-8NeuAc)1 (6NeuAc)2 + (Man)3(GlcNAc)2	3597.41	4b_a_F
(Hex)3 (HexNAc)4 (Fuc)2 (3-8NeuAc)2 (6NeuAc)1 + (Man)3(GlcNAc)2	3569.38	4b_a_F
(Hex)3 (HexNAc)4 (Fuc)2 (3-8NeuAc)3 + (Man)3(GlcNAc)2	3541.35	4b_a_F
(Hex)3 (HexNAc)5 (Fuc)2 (6NeuAc)3 + (Man)3(GlcNAc)2	3828.52	5a
(Hex)3 (HexNAc)5 (Fuc)2 (3-8NeuAc)1 (6NeuAc)2 + (Man)3(GlcNAc)2	3800.49	5a
(Hex)3 (HexNAc)5 (Fuc)2 (3-8NeuAc)2 (6NeuAc)1 + (Man)3(GlcNAc)2	3772.46	5a
(Hex)3 (HexNAc)5 (Fuc)2 (3-8NeuAc)3 + (Man)3(GlcNAc)2	3744.43	5a
(Hex)4 (HexNAc)3 (Fuc)2 (6NeuAc)3 + (Man)3(GlcNAc)2	3584.41	Hy_a_F
(Hex)4 (HexNAc)3 (Fuc)2 (3-8NeuAc)1 (6NeuAc)2 + (Man)3(GlcNAc)2	3556.38	Hy_a_F
(Hex)4 (HexNAc)3 (Fuc)2 (3-8NeuAc)2 (6NeuAc)1 + (Man)3(GlcNAc)2	3528.35	Hy_a_F
(Hex)4 (HexNAc)3 (Fuc)2 (3-8NeuAc)3 + (Man)3(GlcNAc)2	3500.32	Hy_a_F
(Hex)4 (HexNAc)4 (Fuc)2 (6NeuAc)3 + (Man)3(GlcNAc)2	3787.49	4_a_F
(Hex)4 (HexNAc)4 (Fuc)2 (3-8NeuAc)1 (6NeuAc)2 + (Man)3(GlcNAc)2	3759.46	4_a_F
(Hex)4 (HexNAc)4 (Fuc)2 (3-8NeuAc)2 (6NeuAc)1 + (Man)3(GlcNAc)2	3731.43	4_a_F
(Hex)4 (HexNAc)4 (Fuc)2 (3-8NeuAc)3 + (Man)3(GlcNAc)2	3703.4	4_a_F
(Hex)4 (HexNAc)5 (Fuc)2 (6NeuAc)3 + (Man)3(GlcNAc)2	3990.57	5a
(Hex)4 (HexNAc)5 (Fuc)2 (3-8NeuAc)1 (6NeuAc)2 + (Man)3(GlcNAc)2	3962.54	5a
(Hex)4 (HexNAc)5 (Fuc)2 (3-8NeuAc)2 (6NeuAc)1 + (Man)3(GlcNAc)2	3934.51	5a
(Hex)4 (HexNAc)5 (Fuc)2 (3-8NeuAc)3 + (Man)3(GlcNAc)2	3906.48	5a
(Hex)5 (HexNAc)3 (Fuc)2 (6NeuAc)3 + (Man)3(GlcNAc)2	3746.47	Hy_a_F
(Hex)5 (HexNAc)3 (Fuc)2 (3-8NeuAc)1 (6NeuAc)2 + (Man)3(GlcNAc)2	3718.44	Hy_a_F
(Hex)5 (HexNAc)3 (Fuc)2 (3-8NeuAc)2 (6NeuAc)1 + (Man)3(GlcNAc)2	3690.41	Hy_a_F
(Hex)5 (HexNAc)3 (Fuc)2 (3-8NeuAc)3 + (Man)3(GlcNAc)2	3662.37	Hy_a_F
(Hex)5 (HexNAc)4 (Fuc)2 (6NeuAc)3 + (Man)3(GlcNAc)2	3949.55	Hy_a_F
(Hex)5 (HexNAc)4 (Fuc)2 (3-8NeuAc)1 (6NeuAc)2 + (Man)3(GlcNAc)2	3921.52	Hy_a_F
(Hex)5 (HexNAc)4 (Fuc)2 (3-8NeuAc)2 (6NeuAc)1 + (Man)3(GlcNAc)2	3893.48	Hy_a_F
(Hex)5 (HexNAc)4 (Fuc)2 (3-8NeuAc)3 + (Man)3(GlcNAc)2	3865.45	Hy_a_F
(Hex)5 (HexNAc)5 (Fuc)2 (6NeuAc)3 + (Man)3(GlcNAc)2	4152.63	5a
(Hex)5 (HexNAc)5 (Fuc)2 (3-8NeuAc)1 (6NeuAc)2 + (Man)3(GlcNAc)2	4124.6	5a
(Hex)5 (HexNAc)5 (Fuc)2 (3-8NeuAc)2 (6NeuAc)1 + (Man)3(GlcNAc)2	4096.56	5a
(Hex)5 (HexNAc)5 (Fuc)2 (3-8NeuAc)3 + (Man)3(GlcNAc)2	4068.53	5a
(Hex)6 (HexNAc)3 (Fuc)2 (6NeuAc)3 + (Man)3(GlcNAc)2	3908.52	Hy_a_F
(Hex)6 (HexNAc)3 (Fuc)2 (3-8NeuAc)1 (6NeuAc)2 + (Man)3(GlcNAc)2	3880.49	Hy_a_F
(Hex)6 (HexNAc)3 (Fuc)2 (3-8NeuAc)2 (6NeuAc)1 + (Man)3(GlcNAc)2	3852.46	Hy_a_F
(Hex)6 (HexNAc)3 (Fuc)2 (3-8NeuAc)3 + (Man)3(GlcNAc)2	3824.43	Hy_a_F
(Hex)6 (HexNAc)4 (Fuc)2 (6NeuAc)3 + (Man)3(GlcNAc)2	4111.6	Hy_a_F
(Hex)6 (HexNAc)4 (Fuc)2 (3-8NeuAc)1 (6NeuAc)2 + (Man)3(GlcNAc)2	4083.57	Hy_a_F
(Hex)6 (HexNAc)4 (Fuc)2 (3-8NeuAc)2 (6NeuAc)1 + (Man)3(GlcNAc)2	4055.54	Hy_a_F
(Hex)6 (HexNAc)4 (Fuc)2 (3-8NeuAc)3 + (Man)3(GlcNAc)2	4027.51	Hy_a_F
(Hex)6 (HexNAc)5 (Fuc)2 (6NeuAc)3 + (Man)3(GlcNAc)2	4314.68	Hy_a_F
(Hex)6 (HexNAc)5 (Fuc)2 (3-8NeuAc)1 (6NeuAc)2 + (Man)3(GlcNAc)2	4286.65	Hy_a_F
(Hex)6 (HexNAc)5 (Fuc)2 (3-8NeuAc)2 (6NeuAc)1 + (Man)3(GlcNAc)2	4258.62	Hy_a_F
(Hex)6 (HexNAc)5 (Fuc)2 (3-8NeuAc)3 + (Man)3(GlcNAc)2	4230.59	Hy_a_F
(Hex)2 (HexNAc)3 (Fuc)3 (6NeuAc)3 + (Man)3(GlcNAc)2	3406.37	3b_a_F
(Hex)2 (HexNAc)3 (Fuc)3 (3-8NeuAc)1 (6NeuAc)2 + (Man)3(GlcNAc)2	3378.34	3b_a_F
(Hex)2 (HexNAc)3 (Fuc)3 (3-8NeuAc)2 (6NeuAc)1 + (Man)3(GlcNAc)2	3350.3	3b_a_F
(Hex)2 (HexNAc)3 (Fuc)3 (3-8NeuAc)3 + (Man)3(GlcNAc)2	3322.27	3b_a_F
(Hex)2 (HexNAc)4 (Fuc)3 (6NeuAc)3 + (Man)3(GlcNAc)2	3609.45	4bL_a_F
(Hex)2 (HexNAc)4 (Fuc)3 (3-8NeuAc)1 (6NeuAc)2 + (Man)3(GlcNAc)2	3581.42	4bL_a_F
(Hex)2 (HexNAc)4 (Fuc)3 (3-8NeuAc)2 (6NeuAc)1 + (Man)3(GlcNAc)2	3553.38	4bL_a_F
(Hex)2 (HexNAc)4 (Fuc)3 (3-8NeuAc)3 + (Man)3(GlcNAc)2	3525.35	4bL_a_F
(Hex)2 (HexNAc)5 (Fuc)3 (6NeuAc)3 + (Man)3(GlcNAc)2	3812.53	5a
(Hex)2 (HexNAc)5 (Fuc)3 (3-8NeuAc)1 (6NeuAc)2 + (Man)3(GlcNAc)2	3784.49	5a
(Hex)2 (HexNAc)5 (Fuc)3 (3-8NeuAc)2 (6NeuAc)1 + (Man)3(GlcNAc)2	3756.46	5a
(Hex)2 (HexNAc)5 (Fuc)3 (3-8NeuAc)3 + (Man)3(GlcNAc)2	3728.43	5a
(Hex)3 (HexNAc)3 (Fuc)3 (6NeuAc)3 + (Man)3(GlcNAc)2	3568.42	3_a_F
(Hex)3 (HexNAc)3 (Fuc)3 (3-8NeuAc)1 (6NeuAc)2 + (Man)3(GlcNAc)2	3540.39	3_a_F
(Hex)3 (HexNAc)3 (Fuc)3 (3-8NeuAc)2 (6NeuAc)1 + (Man)3(GlcNAc)2	3512.36	3_a_F
(Hex)3 (HexNAc)3 (Fuc)3 (3-8NeuAc)3 + (Man)3(GlcNAc)2	3484.33	3_a_F
(Hex)3 (HexNAc)4 (Fuc)3 (6NeuAc)3 + (Man)3(GlcNAc)2	3771.5	4b_a_F
(Hex)3 (HexNAc)4 (Fuc)3 (3-8NeuAc)1 (6NeuAc)2 + (Man)3(GlcNAc)2	3743.47	4b_a_F
(Hex)3 (HexNAc)4 (Fuc)3 (3-8NeuAc)2 (6NeuAc)1 + (Man)3(GlcNAc)2	3715.44	4b_a_F
(Hex)3 (HexNAc)4 (Fuc)3 (3-8NeuAc)3 + (Man)3(GlcNAc)2	3687.41	4b_a_F
(Hex)3 (HexNAc)5 (Fuc)3 (6NeuAc)3 + (Man)3(GlcNAc)2	3974.58	5a
(Hex)3 (HexNAc)5 (Fuc)3 (3-8NeuAc)1 (6NeuAc)2 + (Man)3(GlcNAc)2	3946.55	5a
(Hex)3 (HexNAc)5 (Fuc)3 (3-8NeuAc)2 (6NeuAc)1 + (Man)3(GlcNAc)2	3918.52	5a
(Hex)3 (HexNAc)5 (Fuc)3 (3-8NeuAc)3 + (Man)3(GlcNAc)2	3890.48	5a
(Hex)4 (HexNAc)3 (Fuc)3 (6NeuAc)3 + (Man)3(GlcNAc)2	3730.47	Hy_a_F
(Hex)4 (HexNAc)3 (Fuc)3 (3-8NeuAc)1 (6NeuAc)2 + (Man)3(GlcNAc)2	3702.44	Hy_a_F
(Hex)4 (HexNAc)3 (Fuc)3 (3-8NeuAc)2 (6NeuAc)1 + (Man)3(GlcNAc)2	3674.41	Hy_a_F
(Hex)4 (HexNAc)3 (Fuc)3 (3-8NeuAc)3 + (Man)3(GlcNAc)2	3646.38	Hy_a_F
(Hex)4 (HexNAc)4 (Fuc)3 (6NeuAc)3 + (Man)3(GlcNAc)2	3933.55	4_a_F
(Hex)4 (HexNAc)4 (Fuc)3 (3-8NeuAc)1 (6NeuAc)2 + (Man)3(GlcNAc)2	3905.52	4_a_F
(Hex)4 (HexNAc)4 (Fuc)3 (3-8NeuAc)2 (6NeuAc)1 + (Man)3(GlcNAc)2	3877.49	4_a_F
(Hex)4 (HexNAc)4 (Fuc)3 (3-8NeuAc)3 + (Man)3(GlcNAc)2	3849.46	4_a_F
(Hex)4 (HexNAc)5 (Fuc)3 (6NeuAc)3 + (Man)3(GlcNAc)2	4136.63	5a
(Hex)4 (HexNAc)5 (Fuc)3 (3-8NeuAc)1 (6NeuAc)2 + (Man)3(GlcNAc)2	4108.6	5a
(Hex)4 (HexNAc)5 (Fuc)3 (3-8NeuAc)2 (6NeuAc)1 + (Man)3(GlcNAc)2	4080.57	5a
(Hex)4 (HexNAc)5 (Fuc)3 (3-8NeuAc)3 + (Man)3(GlcNAc)2	4052.54	5a
(Hex)5 (HexNAc)3 (Fuc)3 (6NeuAc)3 + (Man)3(GlcNAc)2	3892.53	Hy_a_F
(Hex)5 (HexNAc)3 (Fuc)3 (3-8NeuAc)1 (6NeuAc)2 + (Man)3(GlcNAc)2	3864.49	Hy_a_F
(Hex)5 (HexNAc)3 (Fuc)3 (3-8NeuAc)2 (6NeuAc)1 + (Man)3(GlcNAc)2	3836.46	Hy_a_F
(Hex)5 (HexNAc)3 (Fuc)3 (3-8NeuAc)3 + (Man)3(GlcNAc)2	3808.43	Hy_a_F
(Hex)5 (HexNAc)4 (Fuc)3 (6NeuAc)3 + (Man)3(GlcNAc)2	4095.61	Hy_a_F
(Hex)5 (HexNAc)4 (Fuc)3 (3-8NeuAc)1 (6NeuAc)2 + (Man)3(GlcNAc)2	4067.57	Hy_a_F
(Hex)5 (HexNAc)4 (Fuc)3 (3-8NeuAc)2 (6NeuAc)1 + (Man)3(GlcNAc)2	4039.54	Hy_a_F
(Hex)5 (HexNAc)4 (Fuc)3 (3-8NeuAc)3 + (Man)3(GlcNAc)2	4011.51	Hy_a_F
(Hex)5 (HexNAc)5 (Fuc)3 (6NeuAc)3 + (Man)3(GlcNAc)2	4298.68	5a
(Hex)5 (HexNAc)5 (Fuc)3 (3-8NeuAc)1 (6NeuAc)2 + (Man)3(GlcNAc)2	4270.65	5a
(Hex)5 (HexNAc)5 (Fuc)3 (3-8NeuAc)2 (6NeuAc)1 + (Man)3(GlcNAc)2	4242.62	5a
(Hex)5 (HexNAc)5 (Fuc)3 (3-8NeuAc)3 + (Man)3(GlcNAc)2	4214.59	5a
(Hex)6 (HexNAc)3 (Fuc)3 (6NeuAc)3 + (Man)3(GlcNAc)2	4054.58	Hy_a_F
(Hex)6 (HexNAc)3 (Fuc)3 (3-8NeuAc)1 (6NeuAc)2 + (Man)3(GlcNAc)2	4026.55	Hy_a_F
(Hex)6 (HexNAc)3 (Fuc)3 (3-8NeuAc)2 (6NeuAc)1 + (Man)3(GlcNAc)2	3998.52	Hy_a_F
(Hex)6 (HexNAc)3 (Fuc)3 (3-8NeuAc)3 + (Man)3(GlcNAc)2	3970.48	Hy_a_F
(Hex)6 (HexNAc)4 (Fuc)3 (6NeuAc)3 + (Man)3(GlcNAc)2	4257.66	Hy_a_F
(Hex)6 (HexNAc)4 (Fuc)3 (3-8NeuAc)1 (6NeuAc)2 + (Man)3(GlcNAc)2	4229.63	Hy_a_F
(Hex)6 (HexNAc)4 (Fuc)3 (3-8NeuAc)2 (6NeuAc)1 + (Man)3(GlcNAc)2	4201.6	Hy_a_F
(Hex)6 (HexNAc)4 (Fuc)3 (3-8NeuAc)3 + (Man)3(GlcNAc)2	4173.56	Hy_a_F
(Hex)6 (HexNAc)5 (Fuc)3 (6NeuAc)3 + (Man)3(GlcNAc)2	4460.74	Hy_a_F
(Hex)6 (HexNAc)5 (Fuc)3 (3-8NeuAc)1 (6NeuAc)2 + (Man)3(GlcNAc)2	4432.71	Hy_a_F
(Hex)6 (HexNAc)5 (Fuc)3 (3-8NeuAc)2 (6NeuAc)1 + (Man)3(GlcNAc)2	4404.67	Hy_a_F
(Hex)6 (HexNAc)5 (Fuc)3 (3-8NeuAc)3 + (Man)3(GlcNAc)2	4376.64	Hy_a_F
(Hex)3 (HexNAc)4 (6NeuAc)3 (GlcA)1 + (Man)3(GlcNAc)2	3550.42	4b_a
(Hex)3 (HexNAc)4 (3-8NeuAc)1 (6NeuAc)2 (GlcA)1 + (Man)3(GlcNAc)2	3522.39	4b_a
(Hex)3 (HexNAc)4 (3-8NeuAc)2 (6NeuAc)1 (GlcA)1 + (Man)3(GlcNAc)2	3494.36	4b_a
(Hex)3 (HexNAc)4 (3-8NeuAc)3 (GlcA)1 + (Man)3(GlcNAc)2	3466.33	4b_a
(Hex)3 (HexNAc)5 (6NeuAc)3 (GlcA)1 + (Man)3(GlcNAc)2	3753.5	5a
(Hex)3 (HexNAc)5 (3-8NeuAc)1 (6NeuAc)2 (GlcA)1 + (Man)3(GlcNAc)2	3725.47	5a
(Hex)3 (HexNAc)5 (3-8NeuAc)2 (6NeuAc)1 (GlcA)1 + (Man)3(GlcNAc)2	3697.44	5a
(Hex)3 (HexNAc)5 (3-8NeuAc)3 (GlcA)1 + (Man)3(GlcNAc)2	3669.41	5a
(Hex)4 (HexNAc)4 (6NeuAc)3 (GlcA)1 + (Man)3(GlcNAc)2	3712.47	4_a
(Hex)4 (HexNAc)4 (3-8NeuAc)1 (6NeuAc)2 (GlcA)1 + (Man)3(GlcNAc)2	3684.44	4_a
(Hex)4 (HexNAc)4 (3-8NeuAc)2 (6NeuAc)1 (GlcA)1 + (Man)3(GlcNAc)2	3656.41	4_a
(Hex)4 (HexNAc)4 (3-8NeuAc)3 (GlcA)1 + (Man)3(GlcNAc)2	3628.38	4_a
(Hex)4 (HexNAc)5 (6NeuAc)3 (GlcA)1 + (Man)3(GlcNAc)2	3915.55	5a
(Hex)4 (HexNAc)5 (3-8NeuAc)1 (6NeuAc)2 (GlcA)1 + (Man)3(GlcNAc)2	3887.52	5a
(Hex)4 (HexNAc)5 (3-8NeuAc)2 (6NeuAc)1 (GlcA)1 + (Man)3(GlcNAc)2	3859.49	5a
(Hex)4 (HexNAc)5 (3-8NeuAc)3 (GlcA)1 + (Man)3(GlcNAc)2	3831.46	5a
(Hex)5 (HexNAc)4 (6NeuAc)3 (GlcA)1 + (Man)3(GlcNAc)2	3874.53	Hy_a
(Hex)5 (HexNAc)4 (3-8NeuAc)1 (6NeuAc)2 (GlcA)1 + (Man)3(GlcNAc)2	3846.49	Hy_a
(Hex)5 (HexNAc)4 (3-8NeuAc)2 (6NeuAc)1 (GlcA)1 + (Man)3(GlcNAc)2	3818.46	Hy_a
(Hex)5 (HexNAc)4 (3-8NeuAc)3 (GlcA)1 + (Man)3(GlcNAc)2	3790.43	Hy_a
(Hex)5 (HexNAc)5 (6NeuAc)3 (GlcA)1 + (Man)3(GlcNAc)2	4077.61	5a
(Hex)5 (HexNAc)5 (3-8NeuAc)1 (6NeuAc)2 (GlcA)1 + (Man)3(GlcNAc)2	4049.57	5a
(Hex)5 (HexNAc)5 (3-8NeuAc)2 (6NeuAc)1 (GlcA)1 + (Man)3(GlcNAc)2	4021.54	5a
(Hex)5 (HexNAc)5 (3-8NeuAc)3 (GlcA)1 + (Man)3(GlcNAc)2	3993.51	5a
(Hex)6 (HexNAc)4 (6NeuAc)3 (GlcA)1 + (Man)3(GlcNAc)2	4036.58	Hy_a
(Hex)6 (HexNAc)4 (3-8NeuAc)1 (6NeuAc)2 (GlcA)1 + (Man)3(GlcNAc)2	4008.55	Hy_a
(Hex)6 (HexNAc)4 (3-8NeuAc)2 (6NeuAc)1 (GlcA)1 + (Man)3(GlcNAc)2	3980.52	Hy_a
(Hex)6 (HexNAc)4 (3-8NeuAc)3 (GlcA)1 + (Man)3(GlcNAc)2	3952.49	Hy_a
(Hex)6 (HexNAc)5 (6NeuAc)3 (GlcA)1 + (Man)3(GlcNAc)2	4239.66	Hy_a
(Hex)6 (HexNAc)5 (3-8NeuAc)1 (6NeuAc)2 (GlcA)1 + (Man)3(GlcNAc)2	4211.63	Hy_a
(Hex)6 (HexNAc)5 (3-8NeuAc)2 (6NeuAc)1 (GlcA)1 + (Man)3(GlcNAc)2	4183.6	Hy_a
(Hex)6 (HexNAc)5 (3-8NeuAc)3 (GlcA)1 + (Man)3(GlcNAc)2	4155.56	Hy_a
(Hex)3 (HexNAc)4 (Fuc)1 (6NeuAc)3 (GlcA)1 + (Man)3(GlcNAc)2	3696.48	4b_a_F
(Hex)3 (HexNAc)4 (Fuc)1 (3-8NeuAc)1 (6NeuAc)2 (GlcA)1 + (Man)3(GlcNAc)2	3668.45	4b_a_F
(Hex)3 (HexNAc)4 (Fuc)1 (3-8NeuAc)2 (6NeuAc)1 (GlcA)1 + (Man)3(GlcNAc)2	3640.42	4b_a_F
(Hex)3 (HexNAc)4 (Fuc)1 (3-8NeuAc)3 (GlcA)1 + (Man)3(GlcNAc)2	3612.38	4b_a_F
(Hex)3 (HexNAc)5 (Fuc)1 (6NeuAc)3 (GlcA)1 + (Man)3(GlcNAc)2	3899.56	5a
(Hex)3 (HexNAc)5 (Fuc)1 (3-8NeuAc)1 (6NeuAc)2 (GlcA)1 + (Man)3(GlcNAc)2	3871.53	5a
(Hex)3 (HexNAc)5 (Fuc)1 (3-8NeuAc)2 (6NeuAc)1 (GlcA)1 + (Man)3(GlcNAc)2	3843.5	5a
(Hex)3 (HexNAc)5 (Fuc)1 (3-8NeuAc)3 (GlcA)1 + (Man)3(GlcNAc)2	3815.46	5a
(Hex)4 (HexNAc)4 (Fuc)1 (6NeuAc)3 (GlcA)1 + (Man)3(GlcNAc)2	3858.53	4_a_F
(Hex)4 (HexNAc)4 (Fuc)1 (3-8NeuAc)1 (6NeuAc)2 (GlcA)1 + (Man)3(GlcNAc)2	3830.5	4_a_F
(Hex)4 (HexNAc)4 (Fuc)1 (3-8NeuAc)2 (6NeuAc)1 (GlcA)1 + (Man)3(GlcNAc)2	3802.47	4_a_F
(Hex)4 (HexNAc)4 (Fuc)1 (3-8NeuAc)3 (GlcA)1 + (Man)3(GlcNAc)2	3774.44	4_a_F
(Hex)4 (HexNAc)5 (Fuc)1 (6NeuAc)3 (GlcA)1 + (Man)3(GlcNAc)2	4061.61	5a
(Hex)4 (HexNAc)5 (Fuc)1 (3-8NeuAc)1 (6NeuAc)2 (GlcA)1 + (Man)3(GlcNAc)2	4033.58	5a
(Hex)4 (HexNAc)5 (Fuc)1 (3-8NeuAc)2 (6NeuAc)1 (GlcA)1 + (Man)3(GlcNAc)2	4005.55	5a
(Hex)4 (HexNAc)5 (Fuc)1 (3-8NeuAc)3 (GlcA)1 + (Man)3(GlcNAc)2	3977.52	5a
(Hex)5 (HexNAc)4 (Fuc)1 (6NeuAc)3 (GlcA)1 + (Man)3(GlcNAc)2	4020.58	Hy_a_F
(Hex)5 (HexNAc)4 (Fuc)1 (3-8NeuAc)1 (6NeuAc)2 (GlcA)1 + (Man)3(GlcNAc)2	3992.55	Hy_a_F
(Hex)5 (HexNAc)4 (Fuc)1 (3-8NeuAc)2 (6NeuAc)1 (GlcA)1 + (Man)3(GlcNAc)2	3964.52	Hy_a_F
(Hex)5 (HexNAc)4 (Fuc)1 (3-8NeuAc)3 (GlcA)1 + (Man)3(GlcNAc)2	3936.49	Hy_a_F
(Hex)5 (HexNAc)5 (Fuc)1 (6NeuAc)3 (GlcA)1 + (Man)3(GlcNAc)2	4223.66	5a
(Hex)5 (HexNAc)5 (Fuc)1 (3-8NeuAc)1 (6NeuAc)2 (GlcA)1 + (Man)3(GlcNAc)2	4195.63	5a
(Hex)5 (HexNAc)5 (Fuc)1 (3-8NeuAc)2 (6NeuAc)1 (GlcA)1 + (Man)3(GlcNAc)2	4167.6	5a
(Hex)5 (HexNAc)5 (Fuc)1 (3-8NeuAc)3 (GlcA)1 + (Man)3(GlcNAc)2	4139.57	5a
(Hex)6 (HexNAc)4 (Fuc)1 (6NeuAc)3 (GlcA)1 + (Man)3(GlcNAc)2	4182.64	Hy_a_F
(Hex)6 (HexNAc)4 (Fuc)1 (3-8NeuAc)1 (6NeuAc)2 (GlcA)1 + (Man)3(GlcNAc)2	4154.61	Hy_a_F
(Hex)6 (HexNAc)4 (Fuc)1 (3-8NeuAc)2 (6NeuAc)1 (GlcA)1 + (Man)3(GlcNAc)2	4126.57	Hy_a_F
(Hex)6 (HexNAc)4 (Fuc)1 (3-8NeuAc)3 (GlcA)1 + (Man)3(GlcNAc)2	4098.54	Hy_a_F
(Hex)6 (HexNAc)5 (Fuc)1 (6NeuAc)3 (GlcA)1 + (Man)3(GlcNAc)2	4385.72	Hy_a_F
(Hex)6 (HexNAc)5 (Fuc)1 (3-8NeuAc)1 (6NeuAc)2 (GlcA)1 + (Man)3(GlcNAc)2	4357.69	Hy_a_F
(Hex)6 (HexNAc)5 (Fuc)1 (3-8NeuAc)2 (6NeuAc)1 (GlcA)1 + (Man)3(GlcNAc)2	4329.65	Hy_a_F
(Hex)6 (HexNAc)5 (Fuc)1 (3-8NeuAc)3 (GlcA)1 + (Man)3(GlcNAc)2	4301.62	Hy_a_F
(Hex)3 (HexNAc)4 (Fuc)2 (6NeuAc)3 (GlcA)1 + (Man)3(GlcNAc)2	3842.54	4b_a_F
(Hex)3 (HexNAc)4 (Fuc)2 (3-8NeuAc)1 (6NeuAc)2 (GlcA)1 + (Man)3(GlcNAc)2	3814.51	4b_a_F
(Hex)3 (HexNAc)4 (Fuc)2 (3-8NeuAc)2 (6NeuAc)1 (GlcA)1 + (Man)3(GlcNAc)2	3786.47	4b_a_F
(Hex)3 (HexNAc)4 (Fuc)2 (3-8NeuAc)3 (GlcA)1 + (Man)3(GlcNAc)2	3758.44	4b_a_F
(Hex)3 (HexNAc)5 (Fuc)2 (6NeuAc)3 (GlcA)1 + (Man)3(GlcNAc)2	4045.62	5a
(Hex)3 (HexNAc)5 (Fuc)2 (3-8NeuAc)1 (6NeuAc)2 (GlcA)1 + (Man)3(GlcNAc)2	4017.58	5a
(Hex)3 (HexNAc)5 (Fuc)2 (3-8NeuAc)2 (6NeuAc)1 (GlcA)1 + (Man)3(GlcNAc)2	3989.55	5a
(Hex)3 (HexNAc)5 (Fuc)2 (3-8NeuAc)3 (GlcA)1 + (Man)3(GlcNAc)2	3961.52	5a
(Hex)4 (HexNAc)4 (Fuc)2 (6NeuAc)3 (GlcA)1 + (Man)3(GlcNAc)2	4004.59	4_a_F
(Hex)4 (HexNAc)4 (Fuc)2 (3-8NeuAc)1 (6NeuAc)2 (GlcA)1 + (Man)3(GlcNAc)2	3976.56	4_a_F
(Hex)4 (HexNAc)4 (Fuc)2 (3-8NeuAc)2 (6NeuAc)1 (GlcA)1 + (Man)3(GlcNAc)2	3948.53	4_a_F
(Hex)4 (HexNAc)4 (Fuc)2 (3-8NeuAc)3 (GlcA)1 + (Man)3(GlcNAc)2	3920.5	4_a_F
(Hex)4 (HexNAc)5 (Fuc)2 (6NeuAc)3 (GlcA)1 + (Man)3(GlcNAc)2	4207.67	5a
(Hex)4 (HexNAc)5 (Fuc)2 (3-8NeuAc)1 (6NeuAc)2 (GlcA)1 + (Man)3(GlcNAc)2	4179.64	5a
(Hex)4 (HexNAc)5 (Fuc)2 (3-8NeuAc)2 (6NeuAc)1 (GlcA)1 + (Man)3(GlcNAc)2	4151.61	5a
(Hex)4 (HexNAc)5 (Fuc)2 (3-8NeuAc)3 (GlcA)1 + (Man)3(GlcNAc)2	4123.57	5a
(Hex)5 (HexNAc)4 (Fuc)2 (6NeuAc)3 (GlcA)1 + (Man)3(GlcNAc)2	4166.64	Hy_a_F
(Hex)5 (HexNAc)4 (Fuc)2 (3-8NeuAc)1 (6NeuAc)2 (GlcA)1 + (Man)3(GlcNAc)2	4138.61	Hy_a_F
(Hex)5 (HexNAc)4 (Fuc)2 (3-8NeuAc)2 (6NeuAc)1 (GlcA)1 + (Man)3(GlcNAc)2	4110.58	Hy_a_F
(Hex)5 (HexNAc)4 (Fuc)2 (3-8NeuAc)3 (GlcA)1 + (Man)3(GlcNAc)2	4082.55	Hy_a_F
(Hex)5 (HexNAc)5 (Fuc)2 (6NeuAc)3 (GlcA)1 + (Man)3(GlcNAc)2	4369.72	5a
(Hex)5 (HexNAc)5 (Fuc)2 (3-8NeuAc)1 (6NeuAc)2 (GlcA)1 + (Man)3(GlcNAc)2	4341.69	5a
(Hex)5 (HexNAc)5 (Fuc)2 (3-8NeuAc)2 (6NeuAc)1 (GlcA)1 + (Man)3(GlcNAc)2	4313.66	5a
(Hex)5 (HexNAc)5 (Fuc)2 (3-8NeuAc)3 (GlcA)1 + (Man)3(GlcNAc)2	4285.63	5a
(Hex)6 (HexNAc)4 (Fuc)2 (6NeuAc)3 (GlcA)1 + (Man)3(GlcNAc)2	4328.69	Hy_a_F
(Hex)6 (HexNAc)4 (Fuc)2 (3-8NeuAc)1 (6NeuAc)2 (GlcA)1 + (Man)3(GlcNAc)2	4300.66	Hy_a_F
(Hex)6 (HexNAc)4 (Fuc)2 (3-8NeuAc)2 (6NeuAc)1 (GlcA)1 + (Man)3(GlcNAc)2	4272.63	Hy_a_F
(Hex)6 (HexNAc)4 (Fuc)2 (3-8NeuAc)3 (GlcA)1 + (Man)3(GlcNAc)2	4244.6	Hy_a_F
(Hex)6 (HexNAc)5 (Fuc)2 (3-8NeuAc)2 (6NeuAc)1 (GlcA)1 + (Man)3(GlcNAc)2	4475.71	Hy_a_F
(Hex)6 (HexNAc)5 (Fuc)2 (3-8NeuAc)3 (GlcA)1 + (Man)3(GlcNAc)2	4447.68	Hy_a_F
(Hex)3 (HexNAc)4 (Fuc)3 (6NeuAc)3 (GlcA)1 + (Man)3(GlcNAc)2	3988.59	4b_a_F
(Hex)3 (HexNAc)4 (Fuc)3 (3-8NeuAc)1 (6NeuAc)2 (GlcA)1 + (Man)3(GlcNAc)2	3960.56	4b_a_F
(Hex)3 (HexNAc)4 (Fuc)3 (3-8NeuAc)2 (6NeuAc)1 (GlcA)1 + (Man)3(GlcNAc)2	3932.53	4b_a_F
(Hex)3 (HexNAc)4 (Fuc)3 (3-8NeuAc)3 (GlcA)1 + (Man)3(GlcNAc)2	3904.5	4b_a_F
(Hex)3 (HexNAc)5 (Fuc)3 (6NeuAc)3 (GlcA)1 + (Man)3(GlcNAc)2	4191.67	5a
(Hex)3 (HexNAc)5 (Fuc)3 (3-8NeuAc)1 (6NeuAc)2 (GlcA)1 + (Man)3(GlcNAc)2	4163.64	5a
(Hex)3 (HexNAc)5 (Fuc)3 (3-8NeuAc)2 (6NeuAc)1 (GlcA)1 + (Man)3(GlcNAc)2	4135.61	5a
(Hex)3 (HexNAc)5 (Fuc)3 (3-8NeuAc)3 (GlcA)1 + (Man)3(GlcNAc)2	4107.58	5a
(Hex)4 (HexNAc)4 (Fuc)3 (6NeuAc)3 (GlcA)1 + (Man)3(GlcNAc)2	4150.65	4_a_F
(Hex)4 (HexNAc)4 (Fuc)3 (3-8NeuAc)1 (6NeuAc)2 (GlcA)1 + (Man)3(GlcNAc)2	4122.62	4_a_F
(Hex)4 (HexNAc)4 (Fuc)3 (3-8NeuAc)2 (6NeuAc)1 (GlcA)1 + (Man)3(GlcNAc)2	4094.58	4_a_F
(Hex)4 (HexNAc)4 (Fuc)3 (3-8NeuAc)3 (GlcA)1 + (Man)3(GlcNAc)2	4066.55	4_a_F
(Hex)4 (HexNAc)5 (Fuc)3 (6NeuAc)3 (GlcA)1 + (Man)3(GlcNAc)2	4353.73	5a
(Hex)4 (HexNAc)5 (Fuc)3 (3-8NeuAc)1 (6NeuAc)2 (GlcA)1 + (Man)3(GlcNAc)2	4325.7	5a
(Hex)4 (HexNAc)5 (Fuc)3 (3-8NeuAc)2 (6NeuAc)1 (GlcA)1 + (Man)3(GlcNAc)2	4297.66	5a
(Hex)4 (HexNAc)5 (Fuc)3 (3-8NeuAc)3 (GlcA)1 + (Man)3(GlcNAc)2	4269.63	5a
(Hex)5 (HexNAc)4 (Fuc)3 (6NeuAc)3 (GlcA)1 + (Man)3(GlcNAc)2	4312.7	Hy_a_F
(Hex)5 (HexNAc)4 (Fuc)3 (3-8NeuAc)1 (6NeuAc)2 (GlcA)1 + (Man)3(GlcNAc)2	4284.67	Hy_a_F
(Hex)5 (HexNAc)4 (Fuc)3 (3-8NeuAc)2 (6NeuAc)1 (GlcA)1 + (Man)3(GlcNAc)2	4256.64	Hy_a_F
(Hex)5 (HexNAc)4 (Fuc)3 (3-8NeuAc)3 (GlcA)1 + (Man)3(GlcNAc)2	4228.61	Hy_a_F
(Hex)5 (HexNAc)5 (Fuc)3 (3-8NeuAc)1 (6NeuAc)2 (GlcA)1 + (Man)3(GlcNAc)2	4487.75	5a
(Hex)5 (HexNAc)5 (Fuc)3 (3-8NeuAc)2 (6NeuAc)1 (GlcA)1 + (Man)3(GlcNAc)2	4459.72	5a
(Hex)5 (HexNAc)5 (Fuc)3 (3-8NeuAc)3 (GlcA)1 + (Man)3(GlcNAc)2	4431.69	5a
(Hex)6 (HexNAc)4 (Fuc)3 (6NeuAc)3 (GlcA)1 + (Man)3(GlcNAc)2	4474.75	Hy_a_F
(Hex)6 (HexNAc)4 (Fuc)3 (3-8NeuAc)1 (6NeuAc)2 (GlcA)1 + (Man)3(GlcNAc)2	4446.72	Hy_a_F
(Hex)6 (HexNAc)4 (Fuc)3 (3-8NeuAc)2 (6NeuAc)1 (GlcA)1 + (Man)3(GlcNAc)2	4418.69	Hy_a_F
(Hex)6 (HexNAc)4 (Fuc)3 (3-8NeuAc)3 (GlcA)1 + (Man)3(GlcNAc)2	4390.66	Hy_a_F
(Hex)3 (HexNAc)4 (6NeuAc)4 + (Man)3(GlcNAc)2	3665.48	4b_a
(Hex)3 (HexNAc)4 (3-8NeuAc)1 (6NeuAc)3 + (Man)3(GlcNAc)2	3637.45	4b_a
(Hex)3 (HexNAc)4 (3-8NeuAc)2 (6NeuAc)2 + (Man)3(GlcNAc)2	3609.42	4b_a
(Hex)3 (HexNAc)4 (3-8NeuAc)3 (6NeuAc)1 + (Man)3(GlcNAc)2	3581.39	4b_a
(Hex)3 (HexNAc)4 (3-8NeuAc)4 + (Man)3(GlcNAc)2	3553.36	4b_a
(Hex)3 (HexNAc)5 (6NeuAc)4 + (Man)3(GlcNAc)2	3868.56	5a
(Hex)3 (HexNAc)5 (3-8NeuAc)1 (6NeuAc)3 + (Man)3(GlcNAc)2	3840.53	5a
(Hex)3 (HexNAc)5 (3-8NeuAc)2 (6NeuAc)2 + (Man)3(GlcNAc)2	3812.5	5a
(Hex)3 (HexNAc)5 (3-8NeuAc)3 (6NeuAc)1 + (Man)3(GlcNAc)2	3784.47	5a
(Hex)3 (HexNAc)5 (3-8NeuAc)4 + (Man)3(GlcNAc)2	3756.44	5a
(Hex)4 (HexNAc)4 (6NeuAc)4 + (Man)3(GlcNAc)2	3827.54	4_a
(Hex)4 (HexNAc)4 (3-8NeuAc)1 (6NeuAc)3 + (Man)3(GlcNAc)2	3799.51	4_a
(Hex)4 (HexNAc)4 (3-8NeuAc)2 (6NeuAc)2 + (Man)3(GlcNAc)2	3771.47	4_a
(Hex)4 (HexNAc)4 (3-8NeuAc)3 (6NeuAc)1 + (Man)3(GlcNAc)2	3743.44	4_a
(Hex)4 (HexNAc)4 (3-8NeuAc)4 + (Man)3(GlcNAc)2	3715.41	4_a
(Hex)4 (HexNAc)5 (6NeuAc)4 + (Man)3(GlcNAc)2	4030.62	5a
(Hex)4 (HexNAc)5 (3-8NeuAc)1 (6NeuAc)3 + (Man)3(GlcNAc)2	4002.58	5a
(Hex)4 (HexNAc)5 (3-8NeuAc)2 (6NeuAc)2 + (Man)3(GlcNAc)2	3974.55	5a
(Hex)4 (HexNAc)5 (3-8NeuAc)3 (6NeuAc)1 + (Man)3(GlcNAc)2	3946.52	5a
(Hex)4 (HexNAc)5 (3-8NeuAc)4 + (Man)3(GlcNAc)2	3918.49	5a
(Hex)5 (HexNAc)4 (6NeuAc)4 + (Man)3(GlcNAc)2	3989.59	Hy_a
(Hex)5 (HexNAc)4 (3-8NeuAc)1 (6NeuAc)3 + (Man)3(GlcNAc)2	3961.56	Hy_a
(Hex)5 (HexNAc)4 (3-8NeuAc)2 (6NeuAc)2 + (Man)3(GlcNAc)2	3933.53	Hy_a
(Hex)5 (HexNAc)4 (3-8NeuAc)3 (6NeuAc)1 + (Man)3(GlcNAc)2	3905.5	Hy_a
(Hex)5 (HexNAc)4 (3-8NeuAc)4 + (Man)3(GlcNAc)2	3877.46	Hy_a
(Hex)5 (HexNAc)5 (6NeuAc)4 + (Man)3(GlcNAc)2	4192.67	5a
(Hex)5 (HexNAc)5 (3-8NeuAc)1 (6NeuAc)3 + (Man)3(GlcNAc)2	4164.64	5a
(Hex)5 (HexNAc)5 (3-8NeuAc)2 (6NeuAc)2 + (Man)3(GlcNAc)2	4136.61	5a
(Hex)5 (HexNAc)5 (3-8NeuAc)3 (6NeuAc)1 + (Man)3(GlcNAc)2	4108.57	5a
(Hex)5 (HexNAc)5 (3-8NeuAc)4 + (Man)3(GlcNAc)2	4080.54	5a
(Hex)6 (HexNAc)4 (6NeuAc)4 + (Man)3(GlcNAc)2	4151.64	Hy_a
(Hex)6 (HexNAc)4 (3-8NeuAc)1 (6NeuAc)3 + (Man)3(GlcNAc)2	4123.61	Hy_a
(Hex)6 (HexNAc)4 (3-8NeuAc)2 (6NeuAc)2 + (Man)3(GlcNAc)2	4095.58	Hy_a
(Hex)6 (HexNAc)4 (3-8NeuAc)3 (6NeuAc)1 + (Man)3(GlcNAc)2	4067.55	Hy_a
(Hex)6 (HexNAc)4 (3-8NeuAc)4 + (Man)3(GlcNAc)2	4039.52	Hy_a
(Hex)6 (HexNAc)5 (6NeuAc)4 + (Man)3(GlcNAc)2	4354.72	Hy_a
(Hex)6 (HexNAc)5 (3-8NeuAc)1 (6NeuAc)3 + (Man)3(GlcNAc)2	4326.69	Hy_a
(Hex)6 (HexNAc)5 (3-8NeuAc)2 (6NeuAc)2 + (Man)3(GlcNAc)2	4298.66	Hy_a
(Hex)6 (HexNAc)5 (3-8NeuAc)3 (6NeuAc)1 + (Man)3(GlcNAc)2	4270.63	Hy_a
(Hex)6 (HexNAc)5 (3-8NeuAc)4 + (Man)3(GlcNAc)2	4242.6	Hy_a
(Hex)3 (HexNAc)4 (Fuc)1 (6NeuAc)4 + (Man)3(GlcNAc)2	3811.54	4b_a_F
(Hex)3 (HexNAc)4 (Fuc)1 (3-8NeuAc)1 (6NeuAc)3 + (Man)3(GlcNAc)2	3783.51	4b_a_F
(Hex)3 (HexNAc)4 (Fuc)1 (3-8NeuAc)2 (6NeuAc)2 + (Man)3(GlcNAc)2	3755.48	4b_a_F
(Hex)3 (HexNAc)4 (Fuc)1 (3-8NeuAc)3 (6NeuAc)1 + (Man)3(GlcNAc)2	3727.45	4b_a_F
(Hex)3 (HexNAc)4 (Fuc)1 (3-8NeuAc)4 + (Man)3(GlcNAc)2	3699.42	4b_a_F
(Hex)3 (HexNAc)5 (Fuc)1 (6NeuAc)4 + (Man)3(GlcNAc)2	4014.62	5a
(Hex)3 (HexNAc)5 (Fuc)1 (3-8NeuAc)1 (6NeuAc)3 + (Man)3(GlcNAc)2	3986.59	5a
(Hex)3 (HexNAc)5 (Fuc)1 (3-8NeuAc)2 (6NeuAc)2 + (Man)3(GlcNAc)2	3958.56	5a
(Hex)3 (HexNAc)5 (Fuc)1 (3-8NeuAc)3 (6NeuAc)1 + (Man)3(GlcNAc)2	3930.53	5a
(Hex)3 (HexNAc)5 (Fuc)1 (3-8NeuAc)4 + (Man)3(GlcNAc)2	3902.5	5a
(Hex)4 (HexNAc)4 (Fuc)1 (6NeuAc)4 + (Man)3(GlcNAc)2	3973.59	4_a_F
(Hex)4 (HexNAc)4 (Fuc)1 (3-8NeuAc)1 (6NeuAc)3 + (Man)3(GlcNAc)2	3945.56	4_a_F
(Hex)4 (HexNAc)4 (Fuc)1 (3-8NeuAc)2 (6NeuAc)2 + (Man)3(GlcNAc)2	3917.53	4_a_F
(Hex)4 (HexNAc)4 (Fuc)1 (3-8NeuAc)3 (6NeuAc)1 + (Man)3(GlcNAc)2	3889.5	4_a_F
(Hex)4 (HexNAc)4 (Fuc)1 (3-8NeuAc)4 + (Man)3(GlcNAc)2	3861.47	4_a_F
(Hex)4 (HexNAc)5 (Fuc)1 (6NeuAc)4 + (Man)3(GlcNAc)2	4176.67	5a
(Hex)4 (HexNAc)5 (Fuc)1 (3-8NeuAc)1 (6NeuAc)3 + (Man)3(GlcNAc)2	4148.64	5a
(Hex)4 (HexNAc)5 (Fuc)1 (3-8NeuAc)2 (6NeuAc)2 + (Man)3(GlcNAc)2	4120.61	5a
(Hex)4 (HexNAc)5 (Fuc)1 (3-8NeuAc)3 (6NeuAc)1 + (Man)3(GlcNAc)2	4092.58	5a
(Hex)4 (HexNAc)5 (Fuc)1 (3-8NeuAc)4 + (Man)3(GlcNAc)2	4064.55	5a
(Hex)5 (HexNAc)4 (Fuc)1 (6NeuAc)4 + (Man)3(GlcNAc)2	4135.65	Hy_a_F
(Hex)5 (HexNAc)4 (Fuc)1 (3-8NeuAc)1 (6NeuAc)3 + (Man)3(GlcNAc)2	4107.62	Hy_a_F
(Hex)5 (HexNAc)4 (Fuc)1 (3-8NeuAc)2 (6NeuAc)2 + (Man)3(GlcNAc)2	4079.58	Hy_a_F
(Hex)5 (HexNAc)4 (Fuc)1 (3-8NeuAc)3 (6NeuAc)1 + (Man)3(GlcNAc)2	4051.55	Hy_a_F
(Hex)5 (HexNAc)4 (Fuc)1 (3-8NeuAc)4 + (Man)3(GlcNAc)2	4023.52	Hy_a_F
(Hex)5 (HexNAc)5 (Fuc)1 (6NeuAc)4 + (Man)3(GlcNAc)2	4338.73	5a
(Hex)5 (HexNAc)5 (Fuc)1 (3-8NeuAc)1 (6NeuAc)3 + (Man)3(GlcNAc)2	4310.7	5a
(Hex)5 (HexNAc)5 (Fuc)1 (3-8NeuAc)2 (6NeuAc)2 + (Man)3(GlcNAc)2	4282.66	5a
(Hex)5 (HexNAc)5 (Fuc)1 (3-8NeuAc)3 (6NeuAc)1 + (Man)3(GlcNAc)2	4254.63	5a
(Hex)5 (HexNAc)5 (Fuc)1 (3-8NeuAc)4 + (Man)3(GlcNAc)2	4226.6	5a
(Hex)6 (HexNAc)4 (Fuc)1 (6NeuAc)4 + (Man)3(GlcNAc)2	4297.7	Hy_a_F
(Hex)6 (HexNAc)4 (Fuc)1 (3-8NeuAc)1 (6NeuAc)3 + (Man)3(GlcNAc)2	4269.67	Hy_a_F
(Hex)6 (HexNAc)4 (Fuc)1 (3-8NeuAc)2 (6NeuAc)2 + (Man)3(GlcNAc)2	4241.64	Hy_a_F
(Hex)6 (HexNAc)4 (Fuc)1 (3-8NeuAc)3 (6NeuAc)1 + (Man)3(GlcNAc)2	4213.61	Hy_a_F
(Hex)6 (HexNAc)4 (Fuc)1 (3-8NeuAc)4 + (Man)3(GlcNAc)2	4185.58	Hy_a_F
(Hex)6 (HexNAc)5 (Fuc)1 (3-8NeuAc)1 (6NeuAc)3 + (Man)3(GlcNAc)2	4472.75	Hy_a_F
(Hex)6 (HexNAc)5 (Fuc)1 (3-8NeuAc)2 (6NeuAc)2 + (Man)3(GlcNAc)2	4444.72	Hy_a_F
(Hex)6 (HexNAc)5 (Fuc)1 (3-8NeuAc)3 (6NeuAc)1 + (Man)3(GlcNAc)2	4416.69	Hy_a_F
(Hex)6 (HexNAc)5 (Fuc)1 (3-8NeuAc)4 + (Man)3(GlcNAc)2	4388.65	Hy_a_F
(Hex)3 (HexNAc)4 (Fuc)2 (6NeuAc)4 + (Man)3(GlcNAc)2	3957.6	4b_a_F
(Hex)3 (HexNAc)4 (Fuc)2 (3-8NeuAc)1 (6NeuAc)3 + (Man)3(GlcNAc)2	3929.57	4b_a_F
(Hex)3 (HexNAc)4 (Fuc)2 (3-8NeuAc)2 (6NeuAc)2 + (Man)3(GlcNAc)2	3901.54	4b_a_F
(Hex)3 (HexNAc)4 (Fuc)2 (3-8NeuAc)3 (6NeuAc)1 + (Man)3(GlcNAc)2	3873.51	4b_a_F
(Hex)3 (HexNAc)4 (Fuc)2 (3-8NeuAc)4 + (Man)3(GlcNAc)2	3845.47	4b_a_F
(Hex)3 (HexNAc)5 (Fuc)2 (6NeuAc)4 + (Man)3(GlcNAc)2	4160.68	5a
(Hex)3 (HexNAc)5 (Fuc)2 (3-8NeuAc)1 (6NeuAc)3 + (Man)3(GlcNAc)2	4132.65	5a
(Hex)3 (HexNAc)5 (Fuc)2 (3-8NeuAc)2 (6NeuAc)2 + (Man)3(GlcNAc)2	4104.62	5a
(Hex)3 (HexNAc)5 (Fuc)2 (3-8NeuAc)3 (6NeuAc)1 + (Man)3(GlcNAc)2	4076.59	5a
(Hex)3 (HexNAc)5 (Fuc)2 (3-8NeuAc)4 + (Man)3(GlcNAc)2	4048.55	5a
(Hex)4 (HexNAc)4 (Fuc)2 (6NeuAc)4 + (Man)3(GlcNAc)2	4119.65	4_a_F
(Hex)4 (HexNAc)4 (Fuc)2 (3-8NeuAc)1 (6NeuAc)3 + (Man)3(GlcNAc)2	4091.62	4_a_F
(Hex)4 (HexNAc)4 (Fuc)2 (3-8NeuAc)2 (6NeuAc)2 + (Man)3(GlcNAc)2	4063.59	4_a_F
(Hex)4 (HexNAc)4 (Fuc)2 (3-8NeuAc)3 (6NeuAc)1 + (Man)3(GlcNAc)2	4035.56	4_a_F
(Hex)4 (HexNAc)4 (Fuc)2 (3-8NeuAc)4 + (Man)3(GlcNAc)2	4007.53	4_a_F
(Hex)4 (HexNAc)5 (Fuc)2 (6NeuAc)4 + (Man)3(GlcNAc)2	4322.73	5a
(Hex)4 (HexNAc)5 (Fuc)2 (3-8NeuAc)1 (6NeuAc)3 + (Man)3(GlcNAc)2	4294.7	5a
(Hex)4 (HexNAc)5 (Fuc)2 (3-8NeuAc)2 (6NeuAc)2 + (Man)3(GlcNAc)2	4266.67	5a
(Hex)4 (HexNAc)5 (Fuc)2 (3-8NeuAc)3 (6NeuAc)1 + (Man)3(GlcNAc)2	4238.64	5a
(Hex)4 (HexNAc)5 (Fuc)2 (3-8NeuAc)4 + (Man)3(GlcNAc)2	4210.61	5a
(Hex)5 (HexNAc)4 (Fuc)2 (6NeuAc)4 + (Man)3(GlcNAc)2	4281.71	Hy_a_F
(Hex)5 (HexNAc)4 (Fuc)2 (3-8NeuAc)1 (6NeuAc)3 + (Man)3(GlcNAc)2	4253.67	Hy_a_F
(Hex)5 (HexNAc)4 (Fuc)2 (3-8NeuAc)2 (6NeuAc)2 + (Man)3(GlcNAc)2	4225.64	Hy_a_F
(Hex)5 (HexNAc)4 (Fuc)2 (3-8NeuAc)3 (6NeuAc)1 + (Man)3(GlcNAc)2	4197.61	Hy_a_F
(Hex)5 (HexNAc)4 (Fuc)2 (3-8NeuAc)4 + (Man)3(GlcNAc)2	4169.58	Hy_a_F
(Hex)5 (HexNAc)5 (Fuc)2 (6NeuAc)4 + (Man)3(GlcNAc)2	4484.78	5a
(Hex)5 (HexNAc)5 (Fuc)2 (3-8NeuAc)1 (6NeuAc)3 + (Man)3(GlcNAc)2	4456.75	5a
(Hex)5 (HexNAc)5 (Fuc)2 (3-8NeuAc)2 (6NeuAc)2 + (Man)3(GlcNAc)2	4428.72	5a
(Hex)5 (HexNAc)5 (Fuc)2 (3-8NeuAc)3 (6NeuAc)1 + (Man)3(GlcNAc)2	4400.69	5a
(Hex)5 (HexNAc)5 (Fuc)2 (3-8NeuAc)4 + (Man)3(GlcNAc)2	4372.66	5a
(Hex)6 (HexNAc)4 (Fuc)2 (6NeuAc)4 + (Man)3(GlcNAc)2	4443.76	Hy_a_F
(Hex)6 (HexNAc)4 (Fuc)2 (3-8NeuAc)1 (6NeuAc)3 + (Man)3(GlcNAc)2	4415.73	Hy_a_F
(Hex)6 (HexNAc)4 (Fuc)2 (3-8NeuAc)2 (6NeuAc)2 + (Man)3(GlcNAc)2	4387.7	Hy_a_F
(Hex)6 (HexNAc)4 (Fuc)2 (3-8NeuAc)3 (6NeuAc)1 + (Man)3(GlcNAc)2	4359.66	Hy_a_F
(Hex)6 (HexNAc)4 (Fuc)2 (3-8NeuAc)4 + (Man)3(GlcNAc)2	4331.63	Hy_a_F
(Hex)3 (HexNAc)4 (Fuc)3 (6NeuAc)4 + (Man)3(GlcNAc)2	4103.66	4b_a_F
(Hex)3 (HexNAc)4 (Fuc)3 (3-8NeuAc)1 (6NeuAc)3 + (Man)3(GlcNAc)2	4075.63	4b_a_F
(Hex)3 (HexNAc)4 (Fuc)3 (3-8NeuAc)2 (6NeuAc)2 + (Man)3(GlcNAc)2	4047.6	4b_a_F
(Hex)3 (HexNAc)4 (Fuc)3 (3-8NeuAc)3 (6NeuAc)1 + (Man)3(GlcNAc)2	4019.56	4b_a_F
(Hex)3 (HexNAc)4 (Fuc)3 (3-8NeuAc)4 + (Man)3(GlcNAc)2	3991.53	4b_a_F
(Hex)3 (HexNAc)5 (Fuc)3 (6NeuAc)4 + (Man)3(GlcNAc)2	4306.74	5a
(Hex)3 (HexNAc)5 (Fuc)3 (3-8NeuAc)1 (6NeuAc)3 + (Man)3(GlcNAc)2	4278.71	5a
(Hex)3 (HexNAc)5 (Fuc)3 (3-8NeuAc)2 (6NeuAc)2 + (Man)3(GlcNAc)2	4250.67	5a
(Hex)3 (HexNAc)5 (Fuc)3 (3-8NeuAc)3 (6NeuAc)1 + (Man)3(GlcNAc)2	4222.64	5a
(Hex)3 (HexNAc)5 (Fuc)3 (3-8NeuAc)4 + (Man)3(GlcNAc)2	4194.61	5a
(Hex)4 (HexNAc)4 (Fuc)3 (6NeuAc)4 + (Man)3(GlcNAc)2	4265.71	4_a_F
(Hex)4 (HexNAc)4 (Fuc)3 (3-8NeuAc)1 (6NeuAc)3 + (Man)3(GlcNAc)2	4237.68	4_a_F
(Hex)4 (HexNAc)4 (Fuc)3 (3-8NeuAc)2 (6NeuAc)2 + (Man)3(GlcNAc)2	4209.65	4_a_F
(Hex)4 (HexNAc)4 (Fuc)3 (3-8NeuAc)3 (6NeuAc)1 + (Man)3(GlcNAc)2	4181.62	4_a_F
(Hex)4 (HexNAc)4 (Fuc)3 (3-8NeuAc)4 + (Man)3(GlcNAc)2	4153.59	4_a_F
(Hex)4 (HexNAc)5 (Fuc)3 (6NeuAc)4 + (Man)3(GlcNAc)2	4468.79	5a
(Hex)4 (HexNAc)5 (Fuc)3 (3-8NeuAc)1 (6NeuAc)3 + (Man)3(GlcNAc)2	4440.76	5a
(Hex)4 (HexNAc)5 (Fuc)3 (3-8NeuAc)2 (6NeuAc)2 + (Man)3(GlcNAc)2	4412.73	5a
(Hex)4 (HexNAc)5 (Fuc)3 (3-8NeuAc)3 (6NeuAc)1 + (Man)3(GlcNAc)2	4384.7	5a
(Hex)4 (HexNAc)5 (Fuc)3 (3-8NeuAc)4 + (Man)3(GlcNAc)2	4356.66	5a
(Hex)5 (HexNAc)4 (Fuc)3 (6NeuAc)4 + (Man)3(GlcNAc)2	4427.76	Hy_a_F
(Hex)5 (HexNAc)4 (Fuc)3 (3-8NeuAc)1 (6NeuAc)3 + (Man)3(GlcNAc)2	4399.73	Hy_a_F
(Hex)5 (HexNAc)4 (Fuc)3 (3-8NeuAc)2 (6NeuAc)2 + (Man)3(GlcNAc)2	4371.7	Hy_a_F
(Hex)5 (HexNAc)4 (Fuc)3 (3-8NeuAc)3 (6NeuAc)1 + (Man)3(GlcNAc)2	4343.67	Hy_a_F
(Hex)5 (HexNAc)4 (Fuc)3 (3-8NeuAc)4 + (Man)3(GlcNAc)2	4315.64	Hy_a_F
(Hex)6 (HexNAc)4 (Fuc)3 (3-8NeuAc)4 + (Man)3(GlcNAc)2	4477.69	Hy_a_F
