# Supplementary material for: Toolbox Accelerating Glycomics (TAG): Improving Large-Scale Serum Glycomics and Refinement to Identify SALSA-Modified and Rare Glycans
Source: Int J Mol Sci. 2022 Oct 28;23(21):13097. doi: 10.3390/ijms232113097 (PMC9656093; doi:10.3390/ijms232113097)
Supplement: Supplementary file 1 [file ijms-23-13097-s001.zip › Table S3b Glycan type description.xlsx]

## Sheet: Sheet1
Table S3b Glycan type description
	glycan type	description
	PM	Pauci-mannose
	PM_F	Pauci-mannose with fucose
	HM	High-mannose
	HM_G	High-mannose with glycose
	1_n	Mono-antennary neutral glycan
	1_n_F	Mono-antennary neutral glycan with fucose
	Hy_n	Neutral hybrid glycan
	Hy_n_F	Neutral hybrid glycan with fucose
	2_n	Biantennary neutral glycan
	2_n_F	Biantennary neutral glycan with fucose
	3bL_n	Triantennary, bisected biantennary, or LacdiNAc neutral glycan
	3bL_n_F	Triantennary, bisected biantennary, or LacdiNAc neutral glycan with fucose
	3b_n	Triantennary or bisected biantennary neutral glycan
	3b_n_F	Triantennary or bisected biantennary neutral glycan with fucose
	3_n	Triantennary neutral glycan
	3_n_F	Trianntenally neutral glycan with fucose
	4bL_n	Tetraantennary, bisected triantennary or LacdiNAc neutral glycan
	4bL_n_F	Tetraantennary, bisected triantennary or LacdiNAc neutral glycan with fucose
	4b_n	Tetraantennary or bisected triantennary neutral glycan
	4b_n_F	Tetraantennary or bisected triantennary neutral glycan with fucose
	4_n	Tetraantennary neutral glycan
	4_n_F	Tetraantennary neutral glycan with fucose
	1_a	Monoantennary acid glycan
	1_a_F	Monoantennary acid glycan with fucose
	Hy_a	Acid hybrid glycan
	Hy_a_F	Acid hybrid glycan with fucose
	2_a	Biantennary acid glycan
	2L_a	Biantennary LacdiNAc acid glycan
	2L_a_F	Biantennary LacdiNAc acid glycan with fucose
	2_a_F	Biantennary acid glycan with fucose
	2L_a_F	Biantennary LacdiNAc acid glycan with fucose
	3bL_a	Triantennary, bisected biantennary, or LacdiNAc acid glycan
	3bL_a_F	Triantennary, bisected biantennary, or LacdiNAc acid glycan with fucose
	3b_a	Triantennary or bisected biantennary acid glycan
	3b_a_F	Triantennary or bisected biantennary acid glycan with fucose
	3_a	Triantennary acid glycan
	3_a_F	Triantennary acid glycan with fucose
	4bL_a	Tetra-antennary, bisected triantennary, LacdiNAc acid glycan
	4bL_a_F	Tetra-antennary, bisected triantennary, LacdiNAc acid glycan with fucose
	4b_a	Tetra-antennary or bisected triantennary acid glycan
	4b_a_F	Tetra-antennary or bisected triantennary acid glycan with fucose
	4_a	Tetraantennary acid glycan
	3_a_FCS	Triantennary FCS glycan
	4_a_F	Tetraantennary acid glycan with fucose
