# Supplementary material for: Toolbox Accelerating Glycomics (TAG): Improving Large-Scale Serum Glycomics and Refinement to Identify SALSA-Modified and Rare Glycans
Source: Int J Mol Sci. 2022 Oct 28;23(21):13097. doi: 10.3390/ijms232113097 (PMC9656093; doi:10.3390/ijms232113097)
Supplement: Supplementary file 1 [file ijms-23-13097-s001.zip › Table S4 summary file of human serum glycomics for carlibration line with R2 is larger than 0.8.xlsx]

## Sheet: summary
Table S4 Summary file of human serum glycomics for calibration line with R2>0.8
id	theoretical m/z	structures	linked structures	obs. m/z1	obs. m/z2	obs. m/z3	obs. m/z4	obs. m/z5	obs. m/z6	obs. m/z7	obs. m/z8	obs. m/z9	obs. m/z10	obs. m/z11	obs. m/z12	obs. m/z13	obs. m/z14	obs. m/z15	obs. m/z16	obs. m/z17	obs. m/z18	obs. m/z19	obs. m/z20	area 1	area 2	area 3	area 4	area 5	area 6	area 7	area 8	area 9	area 10	area 11	area 12	area 13	area 14	area 15	area 16	area 17	area 18	area 19	area 20	ave					std
3	1362.48	(Hex)2 + (Man)3(GlcNAc)2	[1](Hex)4 (HexNAc)2_x000D_ [8](Hex)3 + (Man)3(GlcNAc)2_x000D_ [10](Hex)2 (HexNAc)1 + (Man)3(GlcNAc)2	1362.47	1362.48	1362.49	1362.49	1362.49	1362.5	1362.51	1362.51	1362.51	1362.52	1362.54	1362.54	1362.52	1362.52	1362.53	1362.53	1362.53	1362.53	1362.53	1362.54	6.83037	6.66167	6.68553	6.35415	12.1293	12.1873	12.0489	11.4072	21.6278	21.2992	21.2432	21.2815	25.155	24.4069	24.8361	24.5797	29.2372	27.7001	29.9137	28.5375	6.63293	11.9431	21.3629	24.7444	28.8471	0.200244
5	1403.51	(Hex)1 (HexNAc)1 + (Man)3(GlcNAc)2	[1](Hex)4 (HexNAc)2_x000D_ [2](HexNAc)1 + (Man)3(GlcNAc)2_x000D_ [13](Hex)1 (HexNAc)2 + (Man)3(GlcNAc)2_x000D_ [10](Hex)2 (HexNAc)1 + (Man)3(GlcNAc)2_x000D_ [9](Hex)1 (HexNAc)1 (Fuc)1 + (Man)3(GlcNAc)2_x000D_ [20](Hex)1 (HexNAc)1 (6NeuAc)1 + (Man)3(GlcNAc)2_x000D_ [17](Hex)1 (HexNAc)1 (3-8NeuAc)1 + (Man)3(GlcNAc)2	0	0	0	0	1403.5	1403.52	1403.55	1403.55	1403.53	1403.54	1403.55	1403.56	1403.54	1403.53	1403.54	1403.55	1403.55	1403.55	1403.55	1403.56	0	0	0	0	0.959019	0.878016	0.861093	0.817814	1.66915	1.5675	1.81712	1.53191	1.60227	1.65972	1.51804	1.57504	2.50652	1.93572	2.05897	1.8327	0	0.878985	1.64642	1.58877	2.08348	0
7	1444.53	(HexNAc)2 + (Man)3(GlcNAc)2	[2](HexNAc)1 + (Man)3(GlcNAc)2_x000D_ [14](HexNAc)3 + (Man)3(GlcNAc)2_x000D_ [13](Hex)1 (HexNAc)2 + (Man)3(GlcNAc)2_x000D_ [12](HexNAc)2 (Fuc)1 + (Man)3(GlcNAc)2_x000D_ [15](HexNAc)2 (GlcA)1 + (Man)3(GlcNAc)2	1444.51	1444.53	1444.53	1444.54	1444.54	1444.55	1444.56	1444.56	1444.57	1444.57	1444.59	1444.6	1444.58	1444.58	1444.58	1444.59	1444.59	1444.59	1444.59	1444.6	1.17481	1.10636	1.17374	1.20143	1.81298	1.7897	1.58077	1.58777	2.67382	2.68587	2.64695	2.55102	2.86811	2.77627	2.70953	2.6793	3.44119	2.85355	3.13576	2.83067	1.16409	1.6928	2.63942	2.7583	3.06529	0.040559
8	1524.53	(Hex)3 + (Man)3(GlcNAc)2	[3](Hex)2 + (Man)3(GlcNAc)2_x000D_ [16](Hex)4 + (Man)3(GlcNAc)2_x000D_ [19](Hex)3 (HexNAc)1 + (Man)3(GlcNAc)2	1524.53	1524.54	1524.55	1524.56	1524.55	1524.57	1524.57	1524.57	1524.58	1524.59	1524.61	1524.61	1524.59	1524.59	1524.6	1524.6	1524.6	1524.6	1524.6	1524.61	8.06178	8.00225	7.91594	7.78529	16.2822	16.3604	16.0098	15.4414	28.0533	27.6822	27.5093	27.5745	33.3814	32.4555	32.8933	32.1559	37.6544	36.1975	38.511	37.0347	7.94132	16.0235	27.7048	32.7215	37.3494	0.120017
10	1565.56	(Hex)2 (HexNAc)1 + (Man)3(GlcNAc)2	[3](Hex)2 + (Man)3(GlcNAc)2_x000D_ [5](Hex)1 (HexNAc)1 + (Man)3(GlcNAc)2_x000D_ [22](Hex)2 (HexNAc)2 + (Man)3(GlcNAc)2_x000D_ [19](Hex)3 (HexNAc)1 + (Man)3(GlcNAc)2_x000D_ [18](Hex)2 (HexNAc)1 (Fuc)1 + (Man)3(GlcNAc)2_x000D_ [30](Hex)2 (HexNAc)1 (6NeuAc)1 + (Man)3(GlcNAc)2_x000D_ [28](Hex)2 (HexNAc)1 (3-8NeuAc)1 + (Man)3(GlcNAc)2	1565.57	1565.58	1565.6	1565.6	1565.57	1565.59	1565.6	1565.6	1565.61	1565.61	1565.63	1565.64	1565.62	1565.61	1565.62	1565.63	1565.63	1565.63	1565.63	1565.64	1.11699	1.0818	1.08972	1.15742	1.76402	1.7378	1.80696	1.61609	2.74621	2.83449	2.63013	2.67038	3.29351	3.13931	3.00917	2.82272	3.64026	3.41295	3.40974	3.18327	1.11149	1.73122	2.7203	3.06618	3.41155	0.034132
12	1590.59	(HexNAc)2 (Fuc)1 + (Man)3(GlcNAc)2	[7](HexNAc)2 + (Man)3(GlcNAc)2_x000D_ [4](HexNAc)1 (Fuc)1 + (Man)3(GlcNAc)2_x000D_ [23](HexNAc)3 (Fuc)1 + (Man)3(GlcNAc)2_x000D_ [21](Hex)1 (HexNAc)2 (Fuc)1 + (Man)3(GlcNAc)2	1590.59	1590.6	1590.62	1590.62	1590.61	1590.63	1590.64	1590.64	1590.64	1590.65	1590.67	1590.67	1590.65	1590.65	1590.66	1590.67	1590.66	1590.67	1590.66	1590.67	25.8513	25.7125	25.586	24.7545	46.7501	47.3825	46.1045	45.7591	78.4152	78.05	77.3493	78.2889	91.8896	90.0513	91.1402	90.8361	107.112	104.944	112.289	109.131	25.4761	46.499	78.0259	90.9793	108.369	0.493121
13	1606.59	(Hex)1 (HexNAc)2 + (Man)3(GlcNAc)2	[7](HexNAc)2 + (Man)3(GlcNAc)2_x000D_ [5](Hex)1 (HexNAc)1 + (Man)3(GlcNAc)2_x000D_ [24](Hex)1 (HexNAc)3 + (Man)3(GlcNAc)2_x000D_ [22](Hex)2 (HexNAc)2 + (Man)3(GlcNAc)2_x000D_ [21](Hex)1 (HexNAc)2 (Fuc)1 + (Man)3(GlcNAc)2_x000D_ [25](Hex)1 (HexNAc)2 (GlcA)1 + (Man)3(GlcNAc)2_x000D_ [33](Hex)1 (HexNAc)2 (6NeuAc)1 + (Man)3(GlcNAc)2	1606.57	1606.59	1606.6	1606.6	1606.6	1606.62	1606.62	1606.62	1606.64	1606.64	1606.66	1606.67	1606.64	1606.64	1606.65	1606.65	1606.65	1606.66	1606.65	1606.66	5.37699	4.88629	4.66356	4.58169	8.4702	8.50273	8.61274	7.91256	8.47945	8.29296	8.23882	8.00943	15.364	14.5814	14.6104	14.2944	18.5358	17.0839	18.0343	17.2241	4.87713	8.37456	8.25517	14.7126	17.7195	0.357231
14	1647.61	(HexNAc)3 + (Man)3(GlcNAc)2	[7](HexNAc)2 + (Man)3(GlcNAc)2_x000D_ [24](Hex)1 (HexNAc)3 + (Man)3(GlcNAc)2_x000D_ [23](HexNAc)3 (Fuc)1 + (Man)3(GlcNAc)2_x000D_ [27](HexNAc)3 (GlcA)1 + (Man)3(GlcNAc)2	1647.65	1647.64	1647.64	1647.66	1647.63	1647.65	1647.66	1647.66	1647.66	1647.67	1647.69	1647.69	1647.67	1647.67	1647.68	1647.68	1647.68	1647.69	1647.68	1647.69	8.12518	7.55513	7.3781	6.90032	8.49844	8.34797	7.67711	7.59981	9.45725	9.62535	9.28992	9.00405	10.8279	10.5988	9.80269	10.0025	11.806	11.3684	11.0231	10.5885	7.48968	8.03083	9.34414	10.308	11.1965	0.505945
16	1686.59	(Hex)4 + (Man)3(GlcNAc)2	[8](Hex)3 + (Man)3(GlcNAc)2_x000D_ [26](Hex)5 + (Man)3(GlcNAc)2	1686.59	1686.6	1686.61	1686.62	1686.61	1686.63	1686.64	1686.64	1686.64	1686.65	1686.67	1686.68	1686.66	1686.66	1686.66	1686.67	1686.67	1686.67	1686.67	1686.68	3.51944	3.44527	3.42282	3.29752	5.82771	5.66723	5.48096	5.30312	9.01396	8.72589	8.79379	8.52877	10.5246	10.1241	10.0043	9.68659	11.3286	10.7099	10.9061	10.3408	3.42126	5.56976	8.7656	10.0849	10.8213	0.09225
17	1707.63	(Hex)1 (HexNAc)1 (3-8NeuAc)1 + (Man)3(GlcNAc)2	[5](Hex)1 (HexNAc)1 + (Man)3(GlcNAc)2_x000D_ [28](Hex)2 (HexNAc)1 (3-8NeuAc)1 + (Man)3(GlcNAc)2	0	0	0	0	0	0	0	0	0	1707.69	1707.72	0	1707.69	1707.69	1707.69	1707.7	1707.73	1707.71	1707.7	1707.72	0	0	0	0	0	0	0	0	0	0.769961	0.958043	0	0.851095	0.911898	0.812622	0.836596	1.28766	0.965688	0.986241	0.869085	0	0	0.432001	0.853053	1.02717	0
19	1727.61	(Hex)3 (HexNAc)1 + (Man)3(GlcNAc)2	[8](Hex)3 + (Man)3(GlcNAc)2_x000D_ [10](Hex)2 (HexNAc)1 + (Man)3(GlcNAc)2_x000D_ [32](Hex)3 (HexNAc)2 + (Man)3(GlcNAc)2_x000D_ [43](Hex)3 (HexNAc)1 (6NeuAc)1 + (Man)3(GlcNAc)2_x000D_ [40](Hex)3 (HexNAc)1 (3-8NeuAc)1 + (Man)3(GlcNAc)2	1727.73	1727.75	1727.76	1727.77	1727.73	1727.75	1727.76	1727.77	1727.73	1727.75	1727.77	1727.77	1727.74	1727.73	1727.75	1727.75	1727.74	1727.74	1727.72	1727.72	2.45706	2.3901	2.30264	1.87476	3.34437	3.3746	3.1734	3.18658	4.21437	4.07812	4.25834	4.00038	4.88963	4.79046	4.59527	4.56401	5.45796	4.85271	4.80318	4.40737	2.25614	3.26974	4.1378	4.70984	4.88031	0.261997
20	1735.67	(Hex)1 (HexNAc)1 (6NeuAc)1 + (Man)3(GlcNAc)2	[5](Hex)1 (HexNAc)1 + (Man)3(GlcNAc)2_x000D_ [11](HexNAc)1 (6NeuAc)1 + (Man)3(GlcNAc)2_x000D_ [33](Hex)1 (HexNAc)2 (6NeuAc)1 + (Man)3(GlcNAc)2_x000D_ [30](Hex)2 (HexNAc)1 (6NeuAc)1 + (Man)3(GlcNAc)2_x000D_ [29](Hex)1 (HexNAc)1 (Fuc)1 (6NeuAc)1 + (Man)3(GlcNAc)2	1735.66	1735.67	1735.69	1735.69	1735.68	1735.7	1735.71	1735.71	1735.72	1735.72	1735.75	1735.75	1735.73	1735.73	1735.74	1735.74	1735.74	1735.74	1735.74	1735.75	4.32067	4.16963	3.99043	3.83811	7.24041	7.32025	6.74017	6.71139	10.4452	9.90728	10.1068	9.84361	11.7532	11.5804	11.1805	10.9069	14.9165	13.7368	13.4143	12.7938	4.07971	7.00305	10.0757	11.3553	13.7153	0.210149
21	1752.64	(Hex)1 (HexNAc)2 (Fuc)1 + (Man)3(GlcNAc)2	[13](Hex)1 (HexNAc)2 + (Man)3(GlcNAc)2_x000D_ [12](HexNAc)2 (Fuc)1 + (Man)3(GlcNAc)2_x000D_ [9](Hex)1 (HexNAc)1 (Fuc)1 + (Man)3(GlcNAc)2_x000D_ [34](Hex)1 (HexNAc)3 (Fuc)1 + (Man)3(GlcNAc)2_x000D_ [31](Hex)2 (HexNAc)2 (Fuc)1 + (Man)3(GlcNAc)2_x000D_ [45](Hex)1 (HexNAc)2 (Fuc)1 (6NeuAc)1 + (Man)3(GlcNAc)2	1752.65	1752.66	1752.68	1752.68	1752.67	1752.69	1752.7	1752.7	1752.71	1752.71	1752.74	1752.74	1752.72	1752.72	1752.73	1752.73	1752.73	1752.73	1752.73	1752.74	37.2198	37.0177	37.0378	36.5647	68.8807	72.2043	69.9851	67.9416	117.348	116.859	116.683	117.114	140.565	137.819	140.33	140.243	167.816	164.399	172.844	170.339	36.96	69.7529	117.001	139.739	168.85	0.278799
22	1768.64	(Hex)2 (HexNAc)2 + (Man)3(GlcNAc)2	[13](Hex)1 (HexNAc)2 + (Man)3(GlcNAc)2_x000D_ [10](Hex)2 (HexNAc)1 + (Man)3(GlcNAc)2_x000D_ [35](Hex)2 (HexNAc)3 + (Man)3(GlcNAc)2_x000D_ [32](Hex)3 (HexNAc)2 + (Man)3(GlcNAc)2_x000D_ [31](Hex)2 (HexNAc)2 (Fuc)1 + (Man)3(GlcNAc)2_x000D_ [47](Hex)2 (HexNAc)2 (6NeuAc)1 + (Man)3(GlcNAc)2_x000D_ [44](Hex)2 (HexNAc)2 (3-8NeuAc)1 + (Man)3(GlcNAc)2	1768.63	1768.65	1768.66	1768.66	1768.66	1768.68	1768.69	1768.69	1768.7	1768.71	1768.73	1768.73	1768.71	1768.71	1768.72	1768.72	1768.72	1768.72	1768.72	1768.73	8.1106	7.48415	7.30201	7.08234	14.2997	14.3167	14.4948	13.5586	14.5166	14.5717	14.0294	13.9147	28.2391	27.041	27.1609	26.3778	32.2407	30.7582	31.641	30.6475	7.49477	14.1674	14.2581	27.2047	31.3219	0.442195
23	1793.67	(HexNAc)3 (Fuc)1 + (Man)3(GlcNAc)2	[14](HexNAc)3 + (Man)3(GlcNAc)2_x000D_ [12](HexNAc)2 (Fuc)1 + (Man)3(GlcNAc)2_x000D_ [36](HexNAc)4 (Fuc)1 + (Man)3(GlcNAc)2_x000D_ [34](Hex)1 (HexNAc)3 (Fuc)1 + (Man)3(GlcNAc)2_x000D_ [38](HexNAc)3 (Fuc)1 (GlcA)1 + (Man)3(GlcNAc)2_x000D_ [46](HexNAc)3 (Fuc)1 (3-8NeuAc)1 + (Man)3(GlcNAc)2	1793.67	1793.69	1793.7	1793.7	1793.7	1793.72	1793.73	1793.73	1793.74	1793.74	1793.76	1793.77	1793.75	1793.75	1793.76	1793.76	1793.76	1793.76	1793.76	1793.77	5.90314	5.80731	5.60057	5.46366	9.68868	9.58937	9.35903	9.07398	14.5546	14.2119	14.2244	13.8963	17.3733	16.8405	16.0626	16.2021	19.9148	18.9772	18.9617	18.0724	5.69367	9.42777	14.2218	16.6196	18.9815	0.198634
24	1809.67	(Hex)1 (HexNAc)3 + (Man)3(GlcNAc)2	[14](HexNAc)3 + (Man)3(GlcNAc)2_x000D_ [13](Hex)1 (HexNAc)2 + (Man)3(GlcNAc)2_x000D_ [35](Hex)2 (HexNAc)3 + (Man)3(GlcNAc)2_x000D_ [34](Hex)1 (HexNAc)3 (Fuc)1 + (Man)3(GlcNAc)2_x000D_ [39](Hex)1 (HexNAc)3 (GlcA)1 + (Man)3(GlcNAc)2_x000D_ [50](Hex)1 (HexNAc)3 (6NeuAc)1 + (Man)3(GlcNAc)2	1809.66	1809.67	1809.69	1809.69	1809.69	1809.71	1809.72	1809.72	1809.73	1809.73	1809.76	1809.76	1809.74	1809.74	1809.75	1809.75	1809.75	1809.75	1809.75	1809.76	3.9619	3.74639	3.53555	3.44479	6.40068	6.34026	6.086	5.8368	8.08717	8.05904	7.90627	7.72271	11.5604	11.1344	10.4598	10.5101	13.0504	12.195	12.1826	11.4319	3.67216	6.16593	7.9438	10.9162	12.215	0.230806
26	1848.64	(Hex)5 + (Man)3(GlcNAc)2	[16](Hex)4 + (Man)3(GlcNAc)2_x000D_ [37](Hex)6 + (Man)3(GlcNAc)2_x000D_ [41](Hex)5 (HexNAc)1 + (Man)3(GlcNAc)2	0	1848.66	1848.68	0	1848.67	1848.7	1848.7	1848.7	1848.71	1848.71	1848.74	1848.74	1848.72	1848.72	1848.73	1848.73	1848.73	1848.73	1848.73	1848.74	0	3.5015	3.36595	0	7.116	0.653709	6.64094	6.60414	10.975	10.7091	10.6091	10.3835	13.8534	13.3545	12.9604	12.5059	15.5544	14.6669	14.4061	13.1683	1.71686	5.2537	10.6692	13.1686	14.449	1.98324
28	1869.69	(Hex)2 (HexNAc)1 (3-8NeuAc)1 + (Man)3(GlcNAc)2	[10](Hex)2 (HexNAc)1 + (Man)3(GlcNAc)2_x000D_ [17](Hex)1 (HexNAc)1 (3-8NeuAc)1 + (Man)3(GlcNAc)2_x000D_ [44](Hex)2 (HexNAc)2 (3-8NeuAc)1 + (Man)3(GlcNAc)2_x000D_ [40](Hex)3 (HexNAc)1 (3-8NeuAc)1 + (Man)3(GlcNAc)2	0	0	0	0	1869.7	1869.72	1869.73	1869.73	1869.74	1869.75	1869.77	1869.78	1869.75	1869.75	1869.77	1869.77	1869.77	1869.77	1869.77	1869.78	0	0	0	0	1.12247	1.10915	0.986474	1.00263	1.48315	1.45967	1.52802	1.30055	1.76445	1.86333	1.72196	1.53171	2.13073	1.77096	1.76188	1.57295	0	1.05518	1.44285	1.72036	1.80913	0
30	1897.72	(Hex)2 (HexNAc)1 (6NeuAc)1 + (Man)3(GlcNAc)2	[10](Hex)2 (HexNAc)1 + (Man)3(GlcNAc)2_x000D_ [20](Hex)1 (HexNAc)1 (6NeuAc)1 + (Man)3(GlcNAc)2_x000D_ [47](Hex)2 (HexNAc)2 (6NeuAc)1 + (Man)3(GlcNAc)2_x000D_ [43](Hex)3 (HexNAc)1 (6NeuAc)1 + (Man)3(GlcNAc)2	1897.72	1897.74	1897.75	1897.75	1897.75	1897.77	1897.78	1897.78	1897.78	1897.79	1897.81	1897.82	1897.8	1897.8	1897.81	1897.81	1897.81	1897.81	1897.81	1897.82	12.0309	11.7866	11.6244	11.3122	15.8729	16.6289	16.07	15.8369	17.9784	17.7007	17.6251	16.8285	20.5979	19.3466	19.6501	18.365	21.9539	21.4983	21.3622	20.6097	11.6885	16.1022	17.5332	19.4899	21.356	0.301431
31	1914.7	(Hex)2 (HexNAc)2 (Fuc)1 + (Man)3(GlcNAc)2	[22](Hex)2 (HexNAc)2 + (Man)3(GlcNAc)2_x000D_ [21](Hex)1 (HexNAc)2 (Fuc)1 + (Man)3(GlcNAc)2_x000D_ [18](Hex)2 (HexNAc)1 (Fuc)1 + (Man)3(GlcNAc)2_x000D_ [48](Hex)2 (HexNAc)3 (Fuc)1 + (Man)3(GlcNAc)2_x000D_ [63](Hex)2 (HexNAc)2 (Fuc)1 (6NeuAc)1 + (Man)3(GlcNAc)2_x000D_ [60](Hex)2 (HexNAc)2 (Fuc)1 (3-8NeuAc)1 + (Man)3(GlcNAc)2	1914.7	1914.72	1914.73	1914.74	1914.73	1914.75	1914.76	1914.76	1914.77	1914.77	1914.8	1914.8	1914.78	1914.78	1914.79	1914.8	1914.8	1914.8	1914.8	1914.81	17.7436	17.3988	17.2353	17.1014	35.3525	35.6955	35.3058	34.4837	57.6995	57.1236	55.4623	56.459	73.4004	72.0869	73.0472	71.9689	86.3839	84.6373	86.7659	84.8823	17.3698	35.2094	56.6861	72.6259	85.6674	0.277321
33	1938.74	(Hex)1 (HexNAc)2 (6NeuAc)1 + (Man)3(GlcNAc)2	[13](Hex)1 (HexNAc)2 + (Man)3(GlcNAc)2_x000D_ [20](Hex)1 (HexNAc)1 (6NeuAc)1 + (Man)3(GlcNAc)2_x000D_ [50](Hex)1 (HexNAc)3 (6NeuAc)1 + (Man)3(GlcNAc)2_x000D_ [47](Hex)2 (HexNAc)2 (6NeuAc)1 + (Man)3(GlcNAc)2_x000D_ [45](Hex)1 (HexNAc)2 (Fuc)1 (6NeuAc)1 + (Man)3(GlcNAc)2_x000D_ [68](Hex)1 (HexNAc)2 (6NeuAc)2 + (Man)3(GlcNAc)2	1938.74	1938.76	1938.77	1938.78	1938.78	1938.8	1938.8	1938.81	1938.81	1938.82	1938.84	1938.85	1938.82	1938.82	1938.83	1938.84	1938.84	1938.84	1938.84	1938.85	8.13896	7.93646	7.42583	7.37757	10.0362	10.0444	9.36022	9.39668	12.2698	12.1335	12.0738	11.5284	14.864	14.5168	14.0329	13.5267	17.57	16.2167	16.4212	14.9045	7.7197	9.70937	12.0014	14.2351	16.2781	0.376907
34	1955.72	(Hex)1 (HexNAc)3 (Fuc)1 + (Man)3(GlcNAc)2	[24](Hex)1 (HexNAc)3 + (Man)3(GlcNAc)2_x000D_ [23](HexNAc)3 (Fuc)1 + (Man)3(GlcNAc)2_x000D_ [21](Hex)1 (HexNAc)2 (Fuc)1 + (Man)3(GlcNAc)2_x000D_ [53](Hex)1 (HexNAc)4 (Fuc)1 + (Man)3(GlcNAc)2_x000D_ [48](Hex)2 (HexNAc)3 (Fuc)1 + (Man)3(GlcNAc)2_x000D_ [56](Hex)1 (HexNAc)3 (Fuc)1 (GlcA)1 + (Man)3(GlcNAc)2_x000D_ [71](Hex)1 (HexNAc)3 (Fuc)1 (6NeuAc)1 + (Man)3(GlcNAc)2	1955.73	1955.74	1955.76	1955.76	1955.76	1955.78	1955.79	1955.79	1955.79	1955.8	1955.83	1955.83	1955.81	1955.81	1955.82	1955.82	1955.82	1955.83	1955.82	1955.84	8.16939	7.98077	7.69536	7.69165	15.3284	15.3941	14.8385	14.3892	23.2718	22.6729	22.5663	22.4203	29.1274	28.1408	27.9464	27.0899	33.6635	32.9569	33.6308	32.246	7.88429	14.9875	22.7328	28.0761	33.1243	0.23338
35	1971.72	(Hex)2 (HexNAc)3 + (Man)3(GlcNAc)2	[24](Hex)1 (HexNAc)3 + (Man)3(GlcNAc)2_x000D_ [22](Hex)2 (HexNAc)2 + (Man)3(GlcNAc)2_x000D_ [49](Hex)3 (HexNAc)3 + (Man)3(GlcNAc)2_x000D_ [48](Hex)2 (HexNAc)3 (Fuc)1 + (Man)3(GlcNAc)2_x000D_ [57](Hex)2 (HexNAc)3 (GlcA)1 + (Man)3(GlcNAc)2_x000D_ [75](Hex)2 (HexNAc)3 (6NeuAc)1 + (Man)3(GlcNAc)2	1971.72	1971.7	1971.73	1971.74	1971.74	1971.75	1971.77	1971.77	1971.78	1971.78	1971.81	1971.82	1971.79	1971.79	1971.8	1971.81	1971.81	1971.81	1971.81	1971.82	3.58888	3.57001	2.02997	1.84874	5.79022	5.88362	5.36188	5.37684	5.78806	6.03857	5.57578	5.55765	9.67831	9.15192	8.74657	8.27507	11.1976	9.95452	10.2669	8.92846	2.7594	5.60314	5.74002	8.96297	10.0869	0.949822
37	2010.69	(Hex)6 + (Man)3(GlcNAc)2	[26](Hex)5 + (Man)3(GlcNAc)2_x000D_ [55](Hex)7 + (Man)3(GlcNAc)2	2010.7	2010.71	2010.73	2010.73	2010.73	2010.75	2010.76	2010.76	2010.77	2010.77	2010.8	2010.8	2010.78	2010.78	2010.79	2010.8	2010.8	2010.8	2010.8	2010.81	5.97033	5.81234	5.81659	5.7113	12.6352	12.6177	12.3788	11.9916	18.8387	18.4947	18.4791	18.1711	25.2952	24.2146	24.4774	23.5528	27.3961	26.9826	27.3009	26.1101	5.82764	12.4058	18.4959	24.385	26.9474	0.106853
38	2010.77	(HexNAc)3 (Fuc)1 (GlcA)1 + (Man)3(GlcNAc)2	[23](HexNAc)3 (Fuc)1 + (Man)3(GlcNAc)2_x000D_ [27](HexNAc)3 (GlcA)1 + (Man)3(GlcNAc)2_x000D_ [56](Hex)1 (HexNAc)3 (Fuc)1 (GlcA)1 + (Man)3(GlcNAc)2	2010.7	2010.71	2010.73	2010.73	2010.73	2010.75	2010.76	2010.76	2010.77	2010.77	2010.8	2010.8	2010.78	2010.78	2010.79	2010.8	2010.8	2010.8	2010.8	2010.81	5.97033	5.81234	5.81659	5.7113	12.6352	12.6177	12.3788	11.9916	18.8387	18.4947	18.4791	18.1711	25.2952	24.2146	24.4774	23.5528	27.3961	26.9826	27.3009	26.1101	5.82764	12.4058	18.4959	24.385	26.9474	0.106853
40	2031.74	(Hex)3 (HexNAc)1 (3-8NeuAc)1 + (Man)3(GlcNAc)2	[19](Hex)3 (HexNAc)1 + (Man)3(GlcNAc)2_x000D_ [28](Hex)2 (HexNAc)1 (3-8NeuAc)1 + (Man)3(GlcNAc)2	0	0	0	0	0	0	0	2031.81	2031.78	2031.85	0	2031.88	2031.82	2031.8	2031.82	2031.84	2031.86	2031.85	2031.84	2031.85	0	0	0	0	0	0	0	1.5835	1.72399	1.72038	0	1.59246	1.75671	1.96644	1.49394	1.61174	2.48454	2.01341	1.81232	1.68158	0	0.395875	1.25921	1.70721	1.99796	0
43	2059.77	(Hex)3 (HexNAc)1 (6NeuAc)1 + (Man)3(GlcNAc)2	[19](Hex)3 (HexNAc)1 + (Man)3(GlcNAc)2_x000D_ [30](Hex)2 (HexNAc)1 (6NeuAc)1 + (Man)3(GlcNAc)2_x000D_ [66](Hex)3 (HexNAc)2 (6NeuAc)1 + (Man)3(GlcNAc)2_x000D_ [59](Hex)3 (HexNAc)1 (Fuc)1 (6NeuAc)1 + (Man)3(GlcNAc)2	2059.76	2059.77	2059.81	2059.82	2059.79	2059.81	2059.83	2059.82	2059.84	2059.85	2059.87	2059.88	2059.86	2059.85	2059.87	2059.87	2059.87	2059.87	2059.87	2059.88	4.20263	4.31301	2.71048	3.76827	8.01179	8.18363	7.33779	7.45123	10.1175	9.86801	9.53775	9.31262	13.0582	12.9996	11.9831	11.3425	14.8627	14.1043	13.3517	12.3866	3.7486	7.74611	9.70898	12.3459	13.6763	0.730932
44	2072.77	(Hex)2 (HexNAc)2 (3-8NeuAc)1 + (Man)3(GlcNAc)2	[22](Hex)2 (HexNAc)2 + (Man)3(GlcNAc)2_x000D_ [28](Hex)2 (HexNAc)1 (3-8NeuAc)1 + (Man)3(GlcNAc)2_x000D_ [60](Hex)2 (HexNAc)2 (Fuc)1 (3-8NeuAc)1 + (Man)3(GlcNAc)2_x000D_ [73](Hex)2 (HexNAc)2 (3-8NeuAc)1 (GlcA)1 + (Man)3(GlcNAc)2_x000D_ [93](Hex)2 (HexNAc)2 (3-8NeuAc)1 (6NeuAc)1 + (Man)3(GlcNAc)2_x000D_ [89](Hex)2 (HexNAc)2 (3-8NeuAc)2 + (Man)3(GlcNAc)2	2072.77	2072.78	2072.79	2072.8	2072.79	2072.81	2072.82	2072.82	2072.83	2072.84	2072.87	2072.87	2072.85	2072.84	2072.86	2072.86	2072.86	2072.87	2072.86	2072.88	5.30755	5.22215	5.06042	4.95172	10.4857	10.3371	9.87621	9.81736	13.7793	13.0295	13.8737	13.0052	18.6687	18.6276	17.7714	17.4264	22.9531	20.9701	20.4541	19.3205	5.13546	10.1291	13.422	18.1235	20.9245	0.159712
45	2084.8	(Hex)1 (HexNAc)2 (Fuc)1 (6NeuAc)1 + (Man)3(GlcNAc)2	[21](Hex)1 (HexNAc)2 (Fuc)1 + (Man)3(GlcNAc)2_x000D_ [33](Hex)1 (HexNAc)2 (6NeuAc)1 + (Man)3(GlcNAc)2_x000D_ [29](Hex)1 (HexNAc)1 (Fuc)1 (6NeuAc)1 + (Man)3(GlcNAc)2_x000D_ [71](Hex)1 (HexNAc)3 (Fuc)1 (6NeuAc)1 + (Man)3(GlcNAc)2_x000D_ [63](Hex)2 (HexNAc)2 (Fuc)1 (6NeuAc)1 + (Man)3(GlcNAc)2	2084.8	2084.82	2084.83	2084.83	2084.82	2084.85	2084.86	2084.86	2084.86	2084.87	2084.9	2084.9	2084.88	2084.88	2084.89	2084.9	2084.9	2084.9	2084.89	2084.91	4.03138	3.83838	3.84965	3.8043	7.36607	7.37927	6.87124	6.98296	9.90944	9.86049	9.423	9.2971	12.0318	12.0566	11.5928	11.1932	13.8077	13.4256	13.0369	12.2828	3.88093	7.14988	9.62251	11.7186	13.1382	0.102138
47	2100.8	(Hex)2 (HexNAc)2 (6NeuAc)1 + (Man)3(GlcNAc)2	[22](Hex)2 (HexNAc)2 + (Man)3(GlcNAc)2_x000D_ [33](Hex)1 (HexNAc)2 (6NeuAc)1 + (Man)3(GlcNAc)2_x000D_ [30](Hex)2 (HexNAc)1 (6NeuAc)1 + (Man)3(GlcNAc)2_x000D_ [75](Hex)2 (HexNAc)3 (6NeuAc)1 + (Man)3(GlcNAc)2_x000D_ [66](Hex)3 (HexNAc)2 (6NeuAc)1 + (Man)3(GlcNAc)2_x000D_ [63](Hex)2 (HexNAc)2 (Fuc)1 (6NeuAc)1 + (Man)3(GlcNAc)2_x000D_ [76](Hex)2 (HexNAc)2 (6NeuAc)1 (GlcA)1 + (Man)3(GlcNAc)2_x000D_ [9…	2100.8	2100.82	2100.83	2100.84	2100.83	2100.85	2100.87	2100.87	2100.87	2100.88	2100.91	2100.91	2100.9	2100.89	2100.9	2100.91	2100.91	2100.92	2100.91	2100.92	80.2928	80.0036	79.5371	79.4874	173.123	174.117	174.501	172.804	249.47	248.731	248.467	246.043	332.518	329.181	328.849	326.882	399.114	399.124	403.901	403.043	79.8302	173.636	248.178	329.357	401.296	0.386224
50	2141.82	(Hex)1 (HexNAc)3 (6NeuAc)1 + (Man)3(GlcNAc)2	[24](Hex)1 (HexNAc)3 + (Man)3(GlcNAc)2_x000D_ [33](Hex)1 (HexNAc)2 (6NeuAc)1 + (Man)3(GlcNAc)2_x000D_ [83](Hex)1 (HexNAc)4 (6NeuAc)1 + (Man)3(GlcNAc)2_x000D_ [75](Hex)2 (HexNAc)3 (6NeuAc)1 + (Man)3(GlcNAc)2_x000D_ [71](Hex)1 (HexNAc)3 (Fuc)1 (6NeuAc)1 + (Man)3(GlcNAc)2	0	0	0	0	2141.84	2141.87	2141.88	2141.88	2141.89	2141.9	2141.93	2141.93	2141.91	2141.91	2141.92	2141.92	2141.93	2141.93	2141.93	2141.94	0	0	0	0	17.04	17.0478	16.6483	16.1472	17.8827	17.9709	17.2881	16.9284	26.9061	26.053	25.1288	24.0077	29.4949	28.359	27.6402	26.5598	0	16.7208	17.5175	25.5239	28.0135	0
60	2218.82	(Hex)2 (HexNAc)2 (Fuc)1 (3-8NeuAc)1 + (Man)3(GlcNAc)2	[31](Hex)2 (HexNAc)2 (Fuc)1 + (Man)3(GlcNAc)2_x000D_ [44](Hex)2 (HexNAc)2 (3-8NeuAc)1 + (Man)3(GlcNAc)2_x000D_ [115](Hex)2 (HexNAc)2 (Fuc)1 (3-8NeuAc)1 (6NeuAc)1 + (Man)3(GlcNAc)2_x000D_ [111](Hex)2 (HexNAc)2 (Fuc)1 (3-8NeuAc)2 + (Man)3(GlcNAc)2	2218.82	2218.84	2218.85	2218.86	2218.85	2218.88	2218.89	2218.89	2218.9	2218.91	2218.94	2218.94	2218.92	2218.92	2218.93	2218.94	2218.94	2218.94	2218.93	2218.95	5.61752	5.16302	5.16692	5.23048	9.12802	8.98536	8.58554	8.31605	9.74072	9.84019	9.43377	9.40459	15.4852	15.0652	13.9075	13.3525	17.5873	17.0459	16.9275	16.1641	5.29448	8.75374	9.60482	14.4526	16.9312	0.217567
63	2246.86	(Hex)2 (HexNAc)2 (Fuc)1 (6NeuAc)1 + (Man)3(GlcNAc)2	[31](Hex)2 (HexNAc)2 (Fuc)1 + (Man)3(GlcNAc)2_x000D_ [47](Hex)2 (HexNAc)2 (6NeuAc)1 + (Man)3(GlcNAc)2_x000D_ [45](Hex)1 (HexNAc)2 (Fuc)1 (6NeuAc)1 + (Man)3(GlcNAc)2_x000D_ [98](Hex)2 (HexNAc)3 (Fuc)1 (6NeuAc)1 + (Man)3(GlcNAc)2_x000D_ [118](Hex)2 (HexNAc)2 (Fuc)1 (6NeuAc)2 + (Man)3(GlcNAc)2_x000D_ [115](Hex)2 (HexNAc)2 (Fuc)1 (3-8NeuAc)1 (6NeuAc)1 + (Man)3(GlcNAc)2	0	0	0	0	2246.91	2246.93	2246.94	2246.94	2246.95	2246.95	2246.98	2246.99	2246.97	2246.96	2246.98	2246.98	2246.98	2246.99	2246.98	2247	0	0	0	0	92.8092	93.128	94.5453	92.1379	92.191	91.5374	90.0712	89.8341	138.887	137.733	133.716	132.765	161.792	154.64	155.089	154.58	0	93.1551	90.9084	135.775	156.525	0
64	2247.84	(Hex)1 (HexNAc)3 (Fuc)3 + (Man)3(GlcNAc)2		0	2247.88	2247.9	2247.9	0	0	0	0	0	0	0	0	0	0	0	0	0	0	0	0	0	25.5681	25.9138	25.6521	0	0	0	0	0	0	0	0	0	0	0	0	0	0	0	0	19.2835	0	0	0	0	12.8565
71	2287.88	(Hex)1 (HexNAc)3 (Fuc)1 (6NeuAc)1 + (Man)3(GlcNAc)2	[34](Hex)1 (HexNAc)3 (Fuc)1 + (Man)3(GlcNAc)2_x000D_ [50](Hex)1 (HexNAc)3 (6NeuAc)1 + (Man)3(GlcNAc)2_x000D_ [45](Hex)1 (HexNAc)2 (Fuc)1 (6NeuAc)1 + (Man)3(GlcNAc)2_x000D_ [103](Hex)1 (HexNAc)4 (Fuc)1 (6NeuAc)1 + (Man)3(GlcNAc)2_x000D_ [98](Hex)2 (HexNAc)3 (Fuc)1 (6NeuAc)1 + (Man)3(GlcNAc)2_x000D_ [106](Hex)1 (HexNAc)3 (Fuc)1 (6NeuAc)1 (GlcA)1 + (Man)3(GlcNAc)2	2288.88	2287.91	2287.92	0	2287.92	2287.94	2287.95	2287.96	2287.96	2287.97	2287.99	2288	2287.97	2287.97	2287.99	2287.99	2287.99	2288	2287.99	2288.01	0.618949	0.574548	0.529571	0	6.36168	6.33723	4.87522	5.31882	6.92243	7.05168	6.42768	6.72039	7.80173	8.09364	7.33851	7.26803	9.98813	8.3336	8.63844	7.62178	0.430767	5.72324	6.78055	7.62548	8.64549	0.289487
75	2303.88	(Hex)2 (HexNAc)3 (6NeuAc)1 + (Man)3(GlcNAc)2	[35](Hex)2 (HexNAc)3 + (Man)3(GlcNAc)2_x000D_ [50](Hex)1 (HexNAc)3 (6NeuAc)1 + (Man)3(GlcNAc)2_x000D_ [47](Hex)2 (HexNAc)2 (6NeuAc)1 + (Man)3(GlcNAc)2_x000D_ [99](Hex)3 (HexNAc)3 (6NeuAc)1 + (Man)3(GlcNAc)2_x000D_ [98](Hex)2 (HexNAc)3 (Fuc)1 (6NeuAc)1 + (Man)3(GlcNAc)2_x000D_ [123](Hex)2 (HexNAc)3 (6NeuAc)2 + (Man)3(GlcNAc)2_x000D_ [121](Hex)2 (HexNAc)3 (3-8NeuAc)1 (6NeuAc)1 + (Man)3(GlcNAc)2	2303.88	2303.89	2303.91	2303.91	2303.91	2303.94	2303.95	2303.95	2303.96	2303.97	2304	2304	2303.98	2303.98	2303.99	2303.99	2303.99	2304	2303.99	2304.01	8.96068	8.87957	8.30421	8.36906	17.9371	18.089	16.6367	17.4276	23.6422	23.7846	23.0588	22.5843	32.3496	32.1653	29.7836	29.4826	38.0568	36.8408	35.2789	33.7895	8.62838	17.5226	23.2675	30.9453	35.9915	0.339536
76	2317.89	(Hex)2 (HexNAc)2 (6NeuAc)1 (GlcA)1 + (Man)3(GlcNAc)2	[47](Hex)2 (HexNAc)2 (6NeuAc)1 + (Man)3(GlcNAc)2	0	0	2317.91	2317.91	2317.91	2317.94	2317.95	2317.95	2317.96	2317.97	2318	2318	2317.97	2317.98	2317.99	2317.99	2317.97	2318	2317.99	2318.01	0	0	1.23377	1.25721	1.51944	1.88793	1.65969	1.79381	2.0732	1.99947	2.20965	1.97848	2.56131	2.2197	2.48768	2.32623	2.62203	2.579	2.68693	2.34165	0.622747	1.71522	2.0652	2.39873	2.5574	0.71915
80	2327.84	(Hex)4 (HexNAc)1 (Fuc)3 + (Man)3(GlcNAc)2	[54](Hex)3 (HexNAc)1 (Fuc)3 + (Man)3(GlcNAc)2_x000D_ [102](Hex)5 (HexNAc)1 (Fuc)3 + (Man)3(GlcNAc)2	2327.9	2327.92	2327.94	2327.94	2327.94	2327.97	2327.98	2327.98	2327.98	2327.99	2328.02	2328.02	2328	2328	2328.02	2328.02	2328.02	2328.02	2328.02	2328.03	20.4775	20.0633	19.7563	19.5894	34.0274	34.9603	33.4	32.9931	39.9005	39.7977	38.2254	38.5796	66.8078	64.7275	61.8206	62.8138	76.0273	75.3884	74.9729	72.53	19.9716	33.8452	39.1258	64.0424	74.7296	0.390198
81	2339.85	(Hex)4 (HexNAc)1 (Fuc)1 (3-8NeuAc)1 + (Man)3(GlcNAc)2	[101](Hex)4 (HexNAc)1 (Fuc)2 (3-8NeuAc)1 + (Man)3(GlcNAc)2	0	0	0	0	0	0	0	0	0	2340.16	2340.15	2340.19	2340.17	2340.22	2340.18	2340.18	2340.21	2340.16	2340.16	2340.17	0	0	0	0	0	0	0	0	0	10.5786	10.3266	9.86361	14.9088	15.2175	14.0097	13.5905	19.264	17.0545	16.3114	15.2916	0	0	7.69219	14.4316	16.9804	0
89	2376.89	(Hex)2 (HexNAc)2 (3-8NeuAc)2 + (Man)3(GlcNAc)2	[44](Hex)2 (HexNAc)2 (3-8NeuAc)1 + (Man)3(GlcNAc)2_x000D_ [113](Hex)3 (HexNAc)2 (3-8NeuAc)2 + (Man)3(GlcNAc)2_x000D_ [111](Hex)2 (HexNAc)2 (Fuc)1 (3-8NeuAc)2 + (Man)3(GlcNAc)2	2376.89	2376.91	2376.92	2376.93	2376.93	2376.95	2376.96	2376.96	2376.97	2376.98	2377.01	2377.01	2376.99	2376.99	2377	2377.01	2377.01	2377.01	2377.01	2377.02	2.25822	2.09168	2.0621	2.00848	4.39567	4.22247	4.03692	4.11275	5.27572	5.04169	4.99175	4.88349	7.27041	7.19292	6.72918	6.52083	8.97675	8.45265	8.09592	7.44167	2.10512	4.19195	5.04817	6.92834	8.24175	0.107717
90	2383.88	(Hex)5 (HexNAc)1 (6NeuAc)1 + (Man)3(GlcNAc)2	[41](Hex)5 (HexNAc)1 + (Man)3(GlcNAc)2	0	2383.94	2383.95	2383.97	2383.99	2383.98	2384.01	2383.99	2384.02	2384.02	2384.06	2384.06	2384.03	2384.03	2384.04	2384.05	2384.05	2384.05	2384.04	2384.03	0	0.875706	1.44649	1.49434	2.61615	2.32851	2.27589	2.11327	2.59332	2.37032	2.5059	2.36876	3.2319	3.73239	2.90452	2.97556	4.32178	3.62315	3.49607	2.89566	0.954134	2.33346	2.45958	3.21109	3.58417	0.695404
93	2404.92	(Hex)2 (HexNAc)2 (3-8NeuAc)1 (6NeuAc)1 + (Man)3(GlcNAc)2	[47](Hex)2 (HexNAc)2 (6NeuAc)1 + (Man)3(GlcNAc)2_x000D_ [44](Hex)2 (HexNAc)2 (3-8NeuAc)1 + (Man)3(GlcNAc)2_x000D_ [121](Hex)2 (HexNAc)3 (3-8NeuAc)1 (6NeuAc)1 + (Man)3(GlcNAc)2_x000D_ [116](Hex)3 (HexNAc)2 (3-8NeuAc)1 (6NeuAc)1 + (Man)3(GlcNAc)2_x000D_ [115](Hex)2 (HexNAc)2 (Fuc)1 (3-8NeuAc)1 (6NeuAc)1 + (Man)3(GlcNAc)2	2404.93	2404.95	2404.96	2404.97	2404.96	2404.99	2405	2405	2405.01	2405.02	2405.05	2405.05	2405.03	2405.03	2405.04	2405.05	2405.05	2405.05	2405.05	2405.06	50.2608	50.195	49.0075	48.9746	114.382	110.333	109.947	112.397	150.549	151.65	146.987	149.005	214.654	213.524	212.007	210.832	265.234	266.063	263.944	260.889	49.6095	111.765	149.547	212.754	264.033	0.714744
94	2414.87	(Hex)5 (HexNAc)1 (Fuc)1 (GlcA)1 + (Man)3(GlcNAc)2	[58](Hex)5 (HexNAc)1 (Fuc)1 + (Man)3(GlcNAc)2	2414.93	2414.95	2414.98	2414.98	2414.96	2414.98	2414.99	2415	2415.01	2415.02	2415.05	2415.05	2415.04	2415.02	2415.04	2415.04	2415.05	2415.05	2415.05	2415.06	2.08445	2.14494	1.97595	1.83499	4.24353	4.15974	3.5757	3.89539	5.05831	5.32273	4.80692	4.89806	6.80738	6.68732	6.33124	6.02723	7.82645	7.73064	7.47049	6.92471	2.01008	3.96859	5.02151	6.46329	7.48807	0.136059
95	2432.92	(Hex)1 (HexNAc)5 (GlcA)1 + (Man)3(GlcNAc)2	[67](HexNAc)5 (GlcA)1 + (Man)3(GlcNAc)2_x000D_ [61](Hex)1 (HexNAc)4 (GlcA)1 + (Man)3(GlcNAc)2_x000D_ [119](Hex)2 (HexNAc)5 (GlcA)1 + (Man)3(GlcNAc)2_x000D_ [117](Hex)1 (HexNAc)5 (Fuc)1 (GlcA)1 + (Man)3(GlcNAc)2	2432.97	2432.99	2433	2433.01	2433.05	2433.08	2433.09	2433.09	2433.1	2433.11	2433.14	2433.14	2433.15	2433.14	2433.15	2433.15	2433.16	2433.18	2433.16	2433.18	382.416	384.402	379.767	380.329	807.713	800.077	792.132	802.543	1084.28	1090.35	1079.43	1091.68	1411.99	1445.63	1434.5	1466.76	1780.39	1730.21	1764.96	1778.62	381.729	800.616	1086.43	1439.72	1763.54	2.11544
96	2432.96	(Hex)2 (HexNAc)2 (6NeuAc)2 + (Man)3(GlcNAc)2	[47](Hex)2 (HexNAc)2 (6NeuAc)1 + (Man)3(GlcNAc)2_x000D_ [68](Hex)1 (HexNAc)2 (6NeuAc)2 + (Man)3(GlcNAc)2_x000D_ [123](Hex)2 (HexNAc)3 (6NeuAc)2 + (Man)3(GlcNAc)2_x000D_ [120](Hex)3 (HexNAc)2 (6NeuAc)2 + (Man)3(GlcNAc)2_x000D_ [118](Hex)2 (HexNAc)2 (Fuc)1 (6NeuAc)2 + (Man)3(GlcNAc)2	2432.97	2432.99	2433	2433.01	2433.05	2433.08	2433.09	2433.09	2433.1	2433.11	2433.14	2433.14	2433.15	2433.14	2433.15	2433.15	2433.16	2433.18	2433.16	2433.18	382.416	384.402	379.767	380.329	807.713	800.077	792.132	802.543	1084.28	1090.35	1079.43	1091.68	1411.99	1445.63	1434.5	1466.76	1780.39	1730.21	1764.96	1778.62	381.729	800.616	1086.43	1439.72	1763.54	2.11544
97	2439.9	(Hex)3 (HexNAc)2 (Fuc)2 (GlcA)1 + (Man)3(GlcNAc)2		0	0	0	0	2440.09	2440.11	2440.11	2440.12	2440.14	2440.16	2440.22	2440.23	2440.23	2440.23	2440.24	2440.25	2440.25	2440.24	2440.24	2440.26	0	0	0	0	12.6025	12.2699	11.3895	11.6559	13.7667	15.3865	13.5236	14.5985	18.9753	20.5037	18.9202	19.5253	24.1046	24.5821	24.7087	22.9687	0	11.9795	14.3188	19.4811	24.091	0
99	2465.93	(Hex)3 (HexNAc)3 (6NeuAc)1 + (Man)3(GlcNAc)2	[49](Hex)3 (HexNAc)3 + (Man)3(GlcNAc)2_x000D_ [75](Hex)2 (HexNAc)3 (6NeuAc)1 + (Man)3(GlcNAc)2_x000D_ [66](Hex)3 (HexNAc)2 (6NeuAc)1 + (Man)3(GlcNAc)2_x000D_ [122](Hex)3 (HexNAc)3 (Fuc)1 (6NeuAc)1 + (Man)3(GlcNAc)2_x000D_ [137](Hex)3 (HexNAc)3 (6NeuAc)2 + (Man)3(GlcNAc)2_x000D_ [134](Hex)3 (HexNAc)3 (3-8NeuAc)1 (6NeuAc)1 + (Man)3(GlcNAc)2	2465.93	2465.95	2465.97	2465.95	2465.99	2466.02	2466.03	2466.03	2466.04	2466.05	2466.08	2466.09	2466.08	2466.07	2466.09	2466.09	2466.09	2466.11	2466.1	2466.11	7.48026	7.19763	6.71398	6.84484	16.3973	16.1038	15.7523	15.5914	17.1625	17.4855	16.6022	16.3193	28.7525	27.5898	27.6233	26.1215	32.5885	32.7755	31.5883	30.0777	7.05918	15.9612	16.8924	27.5218	31.7575	0.347169
100	2474.97	(HexNAc)4 (Fuc)2 (6NeuAc)1 + (Man)3(GlcNAc)2	[51](HexNAc)4 (Fuc)2 + (Man)3(GlcNAc)2_x000D_ [69](HexNAc)3 (Fuc)2 (6NeuAc)1 + (Man)3(GlcNAc)2_x000D_ [127](HexNAc)5 (Fuc)2 (6NeuAc)1 + (Man)3(GlcNAc)2	2474.97	2474.99	2475.01	2475.01	2475.04	2475.06	2475.07	2475.08	2475.08	2475.09	2475.12	2475.13	2475.12	2475.11	2475.13	2475.13	2475.14	2475.15	2475.14	2475.16	3.85844	3.94632	3.5536	3.30147	7.1945	6.62697	6.12992	6.21665	9.66658	8.62541	9.78242	8.26404	11.3425	12.2607	11.1609	10.9786	16.907	14.0364	13.5385	12.0558	3.66496	6.54201	9.08461	11.4357	14.1344	0.295027
103	2490.96	(Hex)1 (HexNAc)4 (Fuc)1 (6NeuAc)1 + (Man)3(GlcNAc)2	[53](Hex)1 (HexNAc)4 (Fuc)1 + (Man)3(GlcNAc)2_x000D_ [83](Hex)1 (HexNAc)4 (6NeuAc)1 + (Man)3(GlcNAc)2_x000D_ [71](Hex)1 (HexNAc)3 (Fuc)1 (6NeuAc)1 + (Man)3(GlcNAc)2_x000D_ [130](Hex)1 (HexNAc)5 (Fuc)1 (6NeuAc)1 + (Man)3(GlcNAc)2	0	0	0	0	0	0	0	0	2491.06	0	0	0	0	0	2491.11	0	2491.1	0	0	0	0	0	0	0	0	0	0	0	0.737018	0	0	0	0	0	3.76573	0	6.29922	0	0	0	0	0	0.184254	0.941432	1.5748	0
111	2522.95	(Hex)2 (HexNAc)2 (Fuc)1 (3-8NeuAc)2 + (Man)3(GlcNAc)2	[60](Hex)2 (HexNAc)2 (Fuc)1 (3-8NeuAc)1 + (Man)3(GlcNAc)2_x000D_ [89](Hex)2 (HexNAc)2 (3-8NeuAc)2 + (Man)3(GlcNAc)2_x000D_ [87](Hex)1 (HexNAc)2 (Fuc)1 (3-8NeuAc)2 + (Man)3(GlcNAc)2	2522.95	2522.97	2522.99	2523	2523.02	2523.04	2523.05	2523.06	2523.07	2523.07	2523.1	2523.11	2523.1	2523.09	2523.11	2523.11	2523.12	2523.13	2523.12	2523.13	2.8757	2.85298	2.57063	2.70945	5.67699	5.36724	5.02135	5.06074	6.47421	7.08885	7.11862	5.55364	9.45589	9.24929	9.01194	8.72453	11.2073	10.4976	9.81072	9.04856	2.75219	5.28158	6.55883	9.11041	10.141	0.141661
115	2550.98	(Hex)2 (HexNAc)2 (Fuc)1 (3-8NeuAc)1 (6NeuAc)1 + (Man)3(GlcNAc)2	[63](Hex)2 (HexNAc)2 (Fuc)1 (6NeuAc)1 + (Man)3(GlcNAc)2_x000D_ [60](Hex)2 (HexNAc)2 (Fuc)1 (3-8NeuAc)1 + (Man)3(GlcNAc)2_x000D_ [93](Hex)2 (HexNAc)2 (3-8NeuAc)1 (6NeuAc)1 + (Man)3(GlcNAc)2_x000D_ [133](Hex)2 (HexNAc)3 (Fuc)1 (3-8NeuAc)1 (6NeuAc)1 + (Man)3(GlcNAc)2	2550.99	2551.01	2551.02	2551.03	2551.05	2551.07	2551.09	2551.09	2551.09	2551.11	2551.14	2551.14	2551.13	2551.13	2551.14	2551.14	2551.15	2551.16	2551.15	2551.16	6.60933	6.48385	6.24156	6.01387	14.4257	13.7799	12.9678	13.2888	17.2081	17.2563	16.7806	15.8061	25.108	24.984	23.7397	23.0666	30.3101	29.2121	27.8393	26.3367	6.33715	13.6156	16.7628	24.2246	28.4245	0.264105
116	2566.98	(Hex)3 (HexNAc)2 (3-8NeuAc)1 (6NeuAc)1 + (Man)3(GlcNAc)2	[66](Hex)3 (HexNAc)2 (6NeuAc)1 + (Man)3(GlcNAc)2_x000D_ [93](Hex)2 (HexNAc)2 (3-8NeuAc)1 (6NeuAc)1 + (Man)3(GlcNAc)2_x000D_ [134](Hex)3 (HexNAc)3 (3-8NeuAc)1 (6NeuAc)1 + (Man)3(GlcNAc)2	2566.96	2566.95	2567.04	2567	2567.02	2567.04	2567.07	2567.07	2567.06	2567.11	2567.14	2567.1	2567.11	2567.1	2567.12	2567.12	2567.13	2567.14	2567.13	2567.14	1.74233	1.61927	1.57347	1.47326	3.10511	2.82362	2.74097	2.69568	2.68161	2.51627	2.78607	2.25312	4.77255	4.97233	4.35927	4.37718	5.97451	5.02005	4.76432	4.17709	1.60208	2.84134	2.55927	4.62033	4.98399	0.111622
117	2578.98	(Hex)1 (HexNAc)5 (Fuc)1 (GlcA)1 + (Man)3(GlcNAc)2	[88](Hex)1 (HexNAc)5 (Fuc)1 + (Man)3(GlcNAc)2_x000D_ [95](Hex)1 (HexNAc)5 (GlcA)1 + (Man)3(GlcNAc)2	2579.02	2579.04	2579.06	2579.07	2579.08	2579.11	2579.12	2579.12	2579.13	2579.14	2579.17	2579.18	2579.17	2579.16	2579.18	2579.18	2579.19	2579.2	2579.19	2579.2	23.4398	23.0341	22.3086	22.0548	50.3414	48.9385	46.3446	48.4072	64.5728	64.8799	62.1338	62.8314	89.6095	89.1408	86.9717	85.4725	107.794	106.615	103.752	101.203	22.7093	48.5079	63.6045	87.7987	104.841	0.639816
118	2579.01	(Hex)2 (HexNAc)2 (Fuc)1 (6NeuAc)2 + (Man)3(GlcNAc)2	[63](Hex)2 (HexNAc)2 (Fuc)1 (6NeuAc)1 + (Man)3(GlcNAc)2_x000D_ [96](Hex)2 (HexNAc)2 (6NeuAc)2 + (Man)3(GlcNAc)2_x000D_ [135](Hex)2 (HexNAc)3 (Fuc)1 (6NeuAc)2 + (Man)3(GlcNAc)2	2579.02	2579.04	2579.06	2579.07	2579.08	2579.11	2579.12	2579.12	2579.13	2579.14	2579.17	2579.18	2579.17	2579.16	2579.18	2579.18	2579.19	2579.2	2579.19	2579.2	23.4398	23.0341	22.3086	22.0548	50.3414	48.9385	46.3446	48.4072	64.5728	64.8799	62.1338	62.8314	89.6095	89.1408	86.9717	85.4725	107.794	106.615	103.752	101.203	22.7093	48.5079	63.6045	87.7987	104.841	0.639816
122	2611.99	(Hex)3 (HexNAc)3 (Fuc)1 (6NeuAc)1 + (Man)3(GlcNAc)2	[99](Hex)3 (HexNAc)3 (6NeuAc)1 + (Man)3(GlcNAc)2_x000D_ [98](Hex)2 (HexNAc)3 (Fuc)1 (6NeuAc)1 + (Man)3(GlcNAc)2_x000D_ [153](Hex)3 (HexNAc)3 (Fuc)1 (6NeuAc)2 + (Man)3(GlcNAc)2_x000D_ [150](Hex)3 (HexNAc)3 (Fuc)1 (3-8NeuAc)1 (6NeuAc)1 + (Man)3(GlcNAc)2	2612	2612.01	2612.02	2612.04	2612.05	2612.08	2612.09	2612.09	2612.1	2612.11	2612.14	2612.15	2612.14	2612.13	2612.15	2612.15	2612.15	2612.16	2612.15	2612.17	1.319	1.24401	1.20873	1.19963	2.34405	2.24291	2.06163	2.08471	2.81592	2.73464	2.52227	2.61069	3.76129	3.70804	3.62806	3.3784	4.29579	3.77988	3.61312	3.27274	1.24284	2.18332	2.67088	3.61895	3.74038	0.054257
123	2636.04	(Hex)2 (HexNAc)3 (6NeuAc)2 + (Man)3(GlcNAc)2	[75](Hex)2 (HexNAc)3 (6NeuAc)1 + (Man)3(GlcNAc)2_x000D_ [96](Hex)2 (HexNAc)2 (6NeuAc)2 + (Man)3(GlcNAc)2_x000D_ [137](Hex)3 (HexNAc)3 (6NeuAc)2 + (Man)3(GlcNAc)2_x000D_ [135](Hex)2 (HexNAc)3 (Fuc)1 (6NeuAc)2 + (Man)3(GlcNAc)2_x000D_ [154](Hex)2 (HexNAc)3 (6NeuAc)3 + (Man)3(GlcNAc)2	2636.03	2636.05	2636.07	2636.08	2636.09	2636.12	2636.13	2636.13	2636.14	2636.15	2636.18	2636.19	2636.18	2636.17	2636.19	2636.19	2636.19	2636.2	2636.19	2636.21	1.53866	1.78152	1.43904	1.46591	3.22158	3.06546	2.62869	2.78838	3.39367	3.34026	3.06612	3.06098	4.57649	4.56541	4.36945	3.86084	5.21502	4.87537	4.53697	4.13105	1.55628	2.92603	3.21525	4.34305	4.6896	0.155942
126	2677.06	(Hex)1 (HexNAc)4 (6NeuAc)2 + (Man)3(GlcNAc)2	[83](Hex)1 (HexNAc)4 (6NeuAc)1 + (Man)3(GlcNAc)2	0	0	2677.06	0	2677.07	2677.11	0	0	2677.13	0	2677.18	2677.18	2677.17	2677.16	0	2677.18	0	2677.2	2677.18	2677.2	0	0	0.501368	0	0.997007	0.869236	0	0	0.963181	0	0.93391	0.910744	1.24484	1.27371	0	0.985205	0	1.16097	1.12712	0.999061	0.125342	0.466561	0.701959	0.875938	0.821789	0.250684
129	2692.97	(Hex)5 (HexNAc)2 (Fuc)3 + (Man)3(GlcNAc)2	[114](Hex)5 (HexNAc)2 (Fuc)2 + (Man)3(GlcNAc)2_x000D_ [102](Hex)5 (HexNAc)1 (Fuc)3 + (Man)3(GlcNAc)2_x000D_ [148](Hex)5 (HexNAc)3 (Fuc)3 + (Man)3(GlcNAc)2_x000D_ [164](Hex)5 (HexNAc)2 (Fuc)3 (6NeuAc)1 + (Man)3(GlcNAc)2_x000D_ [159](Hex)5 (HexNAc)2 (Fuc)3 (3-8NeuAc)1 + (Man)3(GlcNAc)2	0	0	0	0	2693.02	2693.18	0	0	2693.11	0	2693.22	2693.21	2693.19	2693.18	2693.23	2693.22	2693.21	2693.24	2693.21	2693.24	0	0	0	0	2.59172	2.22884	0	0	2.20682	0	2.12801	2.06512	3.14502	3.06875	2.98569	2.61258	3.48797	3.06728	2.93067	2.67163	0	1.20514	1.59999	2.95301	3.03939	0
131	2742.03	(Hex)3 (HexNAc)3 (3-8NeuAc)2 + (Man)3(GlcNAc)2	[113](Hex)3 (HexNAc)2 (3-8NeuAc)2 + (Man)3(GlcNAc)2_x000D_ [147](Hex)3 (HexNAc)3 (Fuc)1 (3-8NeuAc)2 + (Man)3(GlcNAc)2_x000D_ [169](Hex)3 (HexNAc)3 (3-8NeuAc)2 (6NeuAc)1 + (Man)3(GlcNAc)2_x000D_ [167](Hex)3 (HexNAc)3 (3-8NeuAc)3 + (Man)3(GlcNAc)2	2742.03	2742.04	2742.06	2742.11	2742.12	2742.07	2742.11	2742.11	2742.12	2742.14	2742.17	2742.17	2742.17	2742.16	2742.18	2742.19	2742.19	2742.2	2742.19	2742.21	1.14627	1.0464	0.927384	1.04649	2.01417	1.90122	1.72758	1.76015	2.11159	2.05729	2.05476	1.91477	2.96935	2.92958	2.64522	2.49837	3.30521	2.91333	2.7158	2.43717	1.04164	1.85078	2.0346	2.76063	2.84288	0.089532
132	2742.05	(Hex)2 (HexNAc)3 (Fuc)3 (6NeuAc)1 + (Man)3(GlcNAc)2	[170](Hex)2 (HexNAc)3 (Fuc)3 (6NeuAc)2 + (Man)3(GlcNAc)2_x000D_ [168](Hex)2 (HexNAc)3 (Fuc)3 (3-8NeuAc)1 (6NeuAc)1 + (Man)3(GlcNAc)2	2742.03	2742.04	2742.06	2742.11	2742.12	2742.07	2742.11	2742.11	2742.12	2742.14	2742.17	2742.17	2742.17	2742.16	2742.18	2742.19	2742.19	2742.2	2742.19	2742.21	1.14627	1.0464	0.927384	1.04649	2.01417	1.90122	1.72758	1.76015	2.11159	2.05729	2.05476	1.91477	2.96935	2.92958	2.64522	2.49837	3.30521	2.91333	2.7158	2.43717	1.04164	1.85078	2.0346	2.76063	2.84288	0.089532
133	2754.06	(Hex)2 (HexNAc)3 (Fuc)1 (3-8NeuAc)1 (6NeuAc)1 + (Man)3(GlcNAc)2	[98](Hex)2 (HexNAc)3 (Fuc)1 (6NeuAc)1 + (Man)3(GlcNAc)2_x000D_ [121](Hex)2 (HexNAc)3 (3-8NeuAc)1 (6NeuAc)1 + (Man)3(GlcNAc)2_x000D_ [115](Hex)2 (HexNAc)2 (Fuc)1 (3-8NeuAc)1 (6NeuAc)1 + (Man)3(GlcNAc)2_x000D_ [150](Hex)3 (HexNAc)3 (Fuc)1 (3-8NeuAc)1 (6NeuAc)1 + (Man)3(GlcNAc)2	2754.07	2754.08	2754.12	2754.1	2754.12	2754.14	2754.16	2754.16	2754.17	2754.18	2754.22	2754.22	2754.21	2754.2	2754.22	2754.22	2754.23	2754.24	2754.23	2754.24	1.22589	1.13899	1.08221	0.986544	1.97304	1.88573	1.67356	1.78901	2.0874	2.03043	1.98741	1.90767	2.92078	2.87232	2.59773	2.48008	3.30312	3.01567	2.79386	2.55926	1.10841	1.83033	2.00323	2.71773	2.91798	0.100456
134	2770.06	(Hex)3 (HexNAc)3 (3-8NeuAc)1 (6NeuAc)1 + (Man)3(GlcNAc)2	[99](Hex)3 (HexNAc)3 (6NeuAc)1 + (Man)3(GlcNAc)2_x000D_ [121](Hex)2 (HexNAc)3 (3-8NeuAc)1 (6NeuAc)1 + (Man)3(GlcNAc)2_x000D_ [116](Hex)3 (HexNAc)2 (3-8NeuAc)1 (6NeuAc)1 + (Man)3(GlcNAc)2_x000D_ [152](Hex)4 (HexNAc)3 (3-8NeuAc)1 (6NeuAc)1 + (Man)3(GlcNAc)2_x000D_ [150](Hex)3 (HexNAc)3 (Fuc)1 (3-8NeuAc)1 (6NeuAc)1 + (Man)3(GlcNAc)2_x000D_ [157](Hex)3 (HexNAc)3 (3-8NeuAc)1 (6NeuAc)1 (GlcA)1 + (Man)3…	2770.06	2770.08	2770.1	2770.11	2770.12	2770.15	2770.16	2770.17	2770.17	2770.18	2770.22	2770.22	2770.21	2770.21	2770.23	2770.23	2770.23	2770.24	2770.23	2770.25	7.40014	7.19385	6.76225	6.67974	16.9099	15.9192	14.6823	15.6288	17.7355	17.8377	16.4541	16.7158	26.6712	26.6153	25.1031	24.4549	30.3832	29.6856	28.1826	26.6185	7.009	15.7851	17.1858	25.7111	28.7175	0.344703
135	2782.09	(Hex)2 (HexNAc)3 (Fuc)1 (6NeuAc)2 + (Man)3(GlcNAc)2	[98](Hex)2 (HexNAc)3 (Fuc)1 (6NeuAc)1 + (Man)3(GlcNAc)2_x000D_ [123](Hex)2 (HexNAc)3 (6NeuAc)2 + (Man)3(GlcNAc)2_x000D_ [118](Hex)2 (HexNAc)2 (Fuc)1 (6NeuAc)2 + (Man)3(GlcNAc)2_x000D_ [153](Hex)3 (HexNAc)3 (Fuc)1 (6NeuAc)2 + (Man)3(GlcNAc)2	2782.1	2782.12	2782.13	2782.14	2782.16	2782.19	2782.2	2782.2	2782.21	2782.22	2782.26	2782.26	2782.25	2782.25	2782.26	2782.27	2782.27	2782.28	2782.27	2782.29	10.9193	10.7249	10.1196	9.90175	22.6892	21.5017	19.8733	21.0825	26.7678	26.999	25.1086	25.5449	37.5619	37.3137	35.6206	34.6385	43.9897	42.8629	41.1389	39.0754	10.4164	21.2867	26.1051	36.2837	41.7667	0.483386
137	2798.09	(Hex)3 (HexNAc)3 (6NeuAc)2 + (Man)3(GlcNAc)2	[99](Hex)3 (HexNAc)3 (6NeuAc)1 + (Man)3(GlcNAc)2_x000D_ [123](Hex)2 (HexNAc)3 (6NeuAc)2 + (Man)3(GlcNAc)2_x000D_ [120](Hex)3 (HexNAc)2 (6NeuAc)2 + (Man)3(GlcNAc)2_x000D_ [153](Hex)3 (HexNAc)3 (Fuc)1 (6NeuAc)2 + (Man)3(GlcNAc)2_x000D_ [162](Hex)3 (HexNAc)3 (6NeuAc)2 (GlcA)1 + (Man)3(GlcNAc)2_x000D_ [176](Hex)3 (HexNAc)3 (6NeuAc)3 + (Man)3(GlcNAc)2_x000D_ [175](Hex)3 (HexNAc)3 (3-8NeuAc)1 (6NeuAc)2…	2798.09	2798.11	2798.13	2798.13	2798.15	2798.18	2798.19	2798.19	2798.2	2798.21	2798.25	2798.25	2798.24	2798.24	2798.25	2798.26	2798.26	2798.27	2798.26	2798.28	7.60708	7.37781	6.85312	6.6899	16.7259	15.8581	14.6472	15.4978	15.4358	15.5927	14.4058	14.5651	25.7822	25.6418	24.2363	23.4757	29.6739	28.4095	26.9381	25.5099	7.13198	15.6822	14.9999	24.784	27.6328	0.431801
142	2831.06	(Hex)4 (HexNAc)4 (6NeuAc)1 + (Man)3(GlcNAc)2	[191](Hex)4 (HexNAc)4 (6NeuAc)2 + (Man)3(GlcNAc)2_x000D_ [177](Hex)4 (HexNAc)4 (3-8NeuAc)1 (6NeuAc)1 + (Man)3(GlcNAc)2	2831.05	2831.08	2831.09	2831.1	2831.12	2831.15	2831.17	2831.17	2831.17	2831.19	2831.22	2831.22	2831.22	2831.21	2831.22	2831.23	2831.24	2831.24	2831.23	2831.25	0.649059	0.691928	0.59105	0.598599	1.29466	1.19671	1.09608	1.17929	1.22792	1.20314	1.12416	1.0882	1.80823	1.76954	1.56167	1.50467	1.95286	1.77154	1.63173	1.47475	0.632659	1.19169	1.16085	1.66103	1.70772	0.047163
143	2831.06	(Hex)3 (HexNAc)2 (Fuc)2 (3-8NeuAc)2 + (Man)3(GlcNAc)2		2831.05	2831.08	2831.09	2831.1	2831.12	2831.15	2831.17	2831.17	2831.17	2831.19	2831.22	2831.22	2831.22	2831.21	2831.22	2831.23	2831.24	2831.24	2831.23	2831.25	0.649059	0.691928	0.59105	0.598599	1.29466	1.19671	1.09608	1.17929	1.22792	1.20314	1.12416	1.0882	1.80823	1.76954	1.56167	1.50467	1.95286	1.77154	1.63173	1.47475	0.632659	1.19169	1.16085	1.66103	1.70772	0.047163
148	2896.05	(Hex)5 (HexNAc)3 (Fuc)3 + (Man)3(GlcNAc)2	[129](Hex)5 (HexNAc)2 (Fuc)3 + (Man)3(GlcNAc)2	0	0	0	0	0	2896.19	0	0	0	0	0	2896.33	0	0	2896.33	2896.29	0	0	2896.33	2896.31	0	0	0	0	0	0.70874	0	0	0	0	0	1.0771	0	0	1.37412	1.28653	0	0	1.46438	1.31978	0	0.177185	0.269276	0.665162	0.69604	0
149	2899.1	(Hex)2 (HexNAc)5 (3-8NeuAc)1 (GlcA)1 + (Man)3(GlcNAc)2	[119](Hex)2 (HexNAc)5 (GlcA)1 + (Man)3(GlcNAc)2_x000D_ [166](Hex)2 (HexNAc)5 (Fuc)1 (3-8NeuAc)1 (GlcA)1 + (Man)3(GlcNAc)2	0	0	0	0	0	0	0	0	0	0	0	2899.25	0	0	2899.24	2899.26	0	0	2899.31	2899.35	0	0	0	0	0	0	0	0	0	0	0	1.41284	0	0	1.69091	1.51141	0	0	2.16372	1.86679	0	0	0.353211	0.80058	1.00762	0
150	2916.11	(Hex)3 (HexNAc)3 (Fuc)1 (3-8NeuAc)1 (6NeuAc)1 + (Man)3(GlcNAc)2	[122](Hex)3 (HexNAc)3 (Fuc)1 (6NeuAc)1 + (Man)3(GlcNAc)2_x000D_ [134](Hex)3 (HexNAc)3 (3-8NeuAc)1 (6NeuAc)1 + (Man)3(GlcNAc)2_x000D_ [133](Hex)2 (HexNAc)3 (Fuc)1 (3-8NeuAc)1 (6NeuAc)1 + (Man)3(GlcNAc)2_x000D_ [200](Hex)3 (HexNAc)3 (Fuc)1 (3-8NeuAc)1 (6NeuAc)2 + (Man)3(GlcNAc)2_x000D_ [195](Hex)3 (HexNAc)3 (Fuc)1 (3-8NeuAc)2 (6NeuAc)1 + (Man)3(GlcNAc)2	2916.11	2916.13	2916.15	2916.14	2916.17	2916.2	2916.22	2916.22	2916.23	2916.24	2916.28	2916.28	2916.27	2916.27	2916.29	2916.29	2916.3	2916.3	2916.29	2916.31	1.83744	1.73909	1.6716	1.66874	3.57486	3.33501	3.02165	3.19346	3.51606	3.37324	3.29704	3.18618	4.90717	4.89707	4.49543	4.35443	5.4809	4.87983	4.53241	4.13	1.72922	3.28125	3.34313	4.66352	4.75578	0.079134
159	2997.1	(Hex)5 (HexNAc)2 (Fuc)3 (3-8NeuAc)1 + (Man)3(GlcNAc)2	[129](Hex)5 (HexNAc)2 (Fuc)3 + (Man)3(GlcNAc)2_x000D_ [186](Hex)6 (HexNAc)2 (Fuc)3 (3-8NeuAc)1 + (Man)3(GlcNAc)2	2997.15	2997.18	2997.19	2997.2	2997.22	2997.25	2997.26	2997.26	2997.27	2997.29	2997.33	2997.33	2997.32	2997.31	2997.33	2997.33	2997.34	2997.35	2997.34	2997.36	2.50318	2.39415	2.30108	2.13497	3.66884	3.3464	2.96284	3.27483	3.02571	3.10495	2.80296	2.85765	5.61454	5.4643	5.14927	4.90932	6.06928	5.5836	5.35394	4.8501	2.33335	3.31323	2.94781	5.28436	5.46423	0.15592
166	3045.16	(Hex)2 (HexNAc)5 (Fuc)1 (3-8NeuAc)1 (GlcA)1 + (Man)3(GlcNAc)2	[149](Hex)2 (HexNAc)5 (3-8NeuAc)1 (GlcA)1 + (Man)3(GlcNAc)2_x000D_ [144](Hex)2 (HexNAc)4 (Fuc)1 (3-8NeuAc)1 (GlcA)1 + (Man)3(GlcNAc)2_x000D_ [193](Hex)2 (HexNAc)5 (Fuc)2 (3-8NeuAc)1 (GlcA)1 + (Man)3(GlcNAc)2	3045.13	0	0	3045.2	3045.21	3045.24	3045.25	0	3045.27	3045.28	3045.33	3045.33	3045.32	3045.31	3045.33	3045.34	3045.35	3045.35	3045.34	3045.36	0.477853	0	0	0.398825	0.779533	0.734859	0.703057	0	1.06701	0.943979	1.01005	0.814459	1.21499	1.18855	1.12879	1.09345	1.43909	1.33441	1.38895	1.21111	0.219169	0.554362	0.958874	1.15644	1.34339	0.255123
169	3074.18	(Hex)3 (HexNAc)3 (3-8NeuAc)2 (6NeuAc)1 + (Man)3(GlcNAc)2	[134](Hex)3 (HexNAc)3 (3-8NeuAc)1 (6NeuAc)1 + (Man)3(GlcNAc)2_x000D_ [131](Hex)3 (HexNAc)3 (3-8NeuAc)2 + (Man)3(GlcNAc)2_x000D_ [203](Hex)3 (HexNAc)4 (3-8NeuAc)2 (6NeuAc)1 + (Man)3(GlcNAc)2_x000D_ [198](Hex)4 (HexNAc)3 (3-8NeuAc)2 (6NeuAc)1 + (Man)3(GlcNAc)2_x000D_ [195](Hex)3 (HexNAc)3 (Fuc)1 (3-8NeuAc)2 (6NeuAc)1 + (Man)3(GlcNAc)2	3074.18	3074.2	3074.22	3074.23	3074.25	3074.28	3074.3	3074.3	3074.31	3074.32	3074.36	3074.37	3074.35	3074.35	3074.37	3074.37	3074.38	3074.38	3074.37	3074.39	6.61236	6.50046	6.01364	5.84401	14.2804	13.0252	11.5382	12.9469	13.7183	14.2433	12.3629	13.0321	21.3899	21.3837	20.0967	19.3333	25.3918	24.125	23.0421	21.2597	6.24262	12.9477	13.3392	20.5509	23.4547	0.371714
170	3074.21	(Hex)2 (HexNAc)3 (Fuc)3 (6NeuAc)2 + (Man)3(GlcNAc)2	[132](Hex)2 (HexNAc)3 (Fuc)3 (6NeuAc)1 + (Man)3(GlcNAc)2_x000D_ [204](Hex)2 (HexNAc)4 (Fuc)3 (6NeuAc)2 + (Man)3(GlcNAc)2_x000D_ [199](Hex)3 (HexNAc)3 (Fuc)3 (6NeuAc)2 + (Man)3(GlcNAc)2_x000D_ [209](Hex)2 (HexNAc)3 (Fuc)3 (6NeuAc)2 (GlcA)1 + (Man)3(GlcNAc)2	3074.18	3074.2	3074.22	3074.23	3074.25	3074.28	3074.3	3074.3	3074.31	3074.32	3074.36	3074.37	3074.35	3074.35	3074.37	3074.37	3074.38	3074.38	3074.37	3074.39	6.61236	6.50046	6.01364	5.84401	14.2804	13.0252	11.5382	12.9469	13.7183	14.2433	12.3629	13.0321	21.3899	21.3837	20.0967	19.3333	25.3918	24.125	23.0421	21.2597	6.24262	12.9477	13.3392	20.5509	23.4547	0.371714
175	3102.22	(Hex)3 (HexNAc)3 (3-8NeuAc)1 (6NeuAc)2 + (Man)3(GlcNAc)2	[137](Hex)3 (HexNAc)3 (6NeuAc)2 + (Man)3(GlcNAc)2_x000D_ [134](Hex)3 (HexNAc)3 (3-8NeuAc)1 (6NeuAc)1 + (Man)3(GlcNAc)2_x000D_ [210](Hex)3 (HexNAc)4 (3-8NeuAc)1 (6NeuAc)2 + (Man)3(GlcNAc)2_x000D_ [201](Hex)4 (HexNAc)3 (3-8NeuAc)1 (6NeuAc)2 + (Man)3(GlcNAc)2_x000D_ [200](Hex)3 (HexNAc)3 (Fuc)1 (3-8NeuAc)1 (6NeuAc)2 + (Man)3(GlcNAc)2	3102.22	3102.24	3102.26	3102.27	3102.29	3102.33	3102.34	3102.34	3102.35	3102.36	3102.41	3102.41	3102.4	3102.39	3102.42	3102.42	3102.43	3102.44	3102.43	3102.45	45.6465	45.7577	43.0263	42.1941	105.085	97.368	87.7925	99.6324	108.451	114.564	100.375	108.319	163.04	167.646	161.474	161.002	205.326	195.141	193.724	184.683	44.1562	97.4695	107.928	163.291	194.718	1.81772
176	3130.25	(Hex)3 (HexNAc)3 (6NeuAc)3 + (Man)3(GlcNAc)2	[137](Hex)3 (HexNAc)3 (6NeuAc)2 + (Man)3(GlcNAc)2_x000D_ [154](Hex)2 (HexNAc)3 (6NeuAc)3 + (Man)3(GlcNAc)2_x000D_ [202](Hex)3 (HexNAc)3 (Fuc)1 (6NeuAc)3 + (Man)3(GlcNAc)2	3130.24	3130.27	3130.29	3130.3	3130.32	3130.35	3130.37	3130.37	3130.38	3130.39	3130.44	3130.44	3130.43	3130.42	3130.44	3130.45	3130.46	3130.46	3130.45	3130.47	14.1638	13.974	12.921	12.5572	33.1734	30.2656	26.3482	30.4843	31.6374	33.4543	28.6348	30.8684	48.1672	49.0624	46.1104	45.1407	58.5192	55.411	53.4249	49.7	13.404	30.0679	31.1487	47.1202	54.2638	0.785815
177	3135.19	(Hex)4 (HexNAc)4 (3-8NeuAc)1 (6NeuAc)1 + (Man)3(GlcNAc)2	[142](Hex)4 (HexNAc)4 (6NeuAc)1 + (Man)3(GlcNAc)2_x000D_ [152](Hex)4 (HexNAc)3 (3-8NeuAc)1 (6NeuAc)1 + (Man)3(GlcNAc)2_x000D_ [205](Hex)4 (HexNAc)4 (Fuc)1 (3-8NeuAc)1 (6NeuAc)1 + (Man)3(GlcNAc)2_x000D_ [220](Hex)4 (HexNAc)4 (3-8NeuAc)1 (6NeuAc)2 + (Man)3(GlcNAc)2_x000D_ [217](Hex)4 (HexNAc)4 (3-8NeuAc)2 (6NeuAc)1 + (Man)3(GlcNAc)2	3135.18	3135.21	3135.22	3135.23	3135.25	3135.29	3135.3	3135.3	3135.31	3135.32	3135.36	3135.36	3135.36	3135.35	3135.37	3135.37	3135.38	3135.39	3135.37	3135.39	2.82209	2.7153	2.36598	2.41511	6.21026	5.5305	4.82364	5.41148	5.21941	5.5121	4.67783	4.91005	7.84057	7.86328	7.12446	6.59628	8.34259	7.6784	7.20515	6.25614	2.57962	5.49397	5.07985	7.35615	7.37057	0.223535
194	3192.21	(Hex)3 (HexNAc)3 (Fuc)1 (3-8NeuAc)3 + (Man)3(GlcNAc)2	[147](Hex)3 (HexNAc)3 (Fuc)1 (3-8NeuAc)2 + (Man)3(GlcNAc)2_x000D_ [167](Hex)3 (HexNAc)3 (3-8NeuAc)3 + (Man)3(GlcNAc)2	0	3192.23	3192.23	3192.24	0	3192.3	3192.33	3192.33	3192.34	3192.35	3192.39	3192.39	3192.38	3192.38	3192.4	0	3192.42	3192.42	3192.41	3192.43	0	0.344598	0.311603	0.3227	0	0.486185	0.430066	0.487075	0.479313	0.518765	0.428397	0.438522	0.671893	0.674018	0.639166	0	0.823756	0.668794	0.619903	0.536425	0.244725	0.350832	0.466249	0.496269	0.662219	0.163725
200	3248.27	(Hex)3 (HexNAc)3 (Fuc)1 (3-8NeuAc)1 (6NeuAc)2 + (Man)3(GlcNAc)2	[153](Hex)3 (HexNAc)3 (Fuc)1 (6NeuAc)2 + (Man)3(GlcNAc)2_x000D_ [150](Hex)3 (HexNAc)3 (Fuc)1 (3-8NeuAc)1 (6NeuAc)1 + (Man)3(GlcNAc)2_x000D_ [175](Hex)3 (HexNAc)3 (3-8NeuAc)1 (6NeuAc)2 + (Man)3(GlcNAc)2_x000D_ [214](Hex)4 (HexNAc)3 (Fuc)1 (3-8NeuAc)1 (6NeuAc)2 + (Man)3(GlcNAc)2_x000D_ [213](Hex)3 (HexNAc)3 (Fuc)2 (3-8NeuAc)1 (6NeuAc)2 + (Man)3(GlcNAc)2	3248.27	3248.3	3248.32	3248.33	3248.35	3248.39	3248.41	3248.41	3248.42	3248.43	3248.48	3248.48	3248.47	3248.46	3248.48	3248.49	3248.5	3248.51	3248.49	3248.51	15.3154	15.2858	14.1043	13.6432	35.2969	31.652	26.9488	32.0259	32.1041	34.3627	28.62	31.466	50.2037	51.6437	48.4822	47.5713	62.0661	57.4481	56.3497	51.6281	14.5872	31.4809	31.6382	49.4752	56.873	0.845089
[truncated: 10 more columns]
