# Supplementary material for: Toolbox Accelerating Glycomics (TAG): Improving Large-Scale Serum Glycomics and Refinement to Identify SALSA-Modified and Rare Glycans
Source: Int J Mol Sci. 2022 Oct 28;23(21):13097. doi: 10.3390/ijms232113097 (PMC9656093; doi:10.3390/ijms232113097)
Supplement: Supplementary file 1 [file ijms-23-13097-s001.zip › Table S5 summary file of human serum glycomics.xlsx]

## Sheet: summary
Table S5: Summary file of human serum glycomics for calibration line
id	theoretical m/z	structures	linked structures	obs. m/z1	obs. m/z2	obs. m/z3	obs. m/z4	obs. m/z5	obs. m/z6	obs. m/z7	obs. m/z8	obs. m/z9	obs. m/z10	obs. m/z11	obs. m/z12	obs. m/z13	obs. m/z14	obs. m/z15	obs. m/z16	obs. m/z17	obs. m/z18	obs. m/z19	obs. m/z20	area 1	area 2	area 3	area 4	area 5	area 6	area 7	area 8	area 9	area 10	area 11	area 12	area 13	area 14	area 15	area 16	area 17	area 18	area 19	area 20	ave					std
248	470.164	(Hex)2	[249](Hex)3	0	0	0	0	0	0	0	0	0	0	0	0	0	0	0	0	0	469.896	0	469.9	0	0	0	0	0	0	0	0	0	0	0	0	0	0	0	0	0	0.618574	0	0.560001	0	0	0	0	0.294644	0
249	632.217	(Hex)3	[248](Hex)2	0	0	0	0	632.265	632.272	632.278	632.276	0	0	0	0	0	0	0	0	0	0	0	0	0	0	0	0	0.628567	0.570958	0.543393	0.411467	0	0	0	0	0	0	0	0	0	0	0	0	0	0.538596	0	0	0	0
250	860.327	(Hex)1 (HexNAc)2 (Fuc)1		0	0	0	0	0	0	861.029	861.024	0	0	0	0	861.032	0	0	0	0	0	0	0	0	0	0	0	0	0	1.25041	0.695924	0	0	0	0	1.55896	0	0	0	0	0	0	0	0	0.486584	0	0.38974	0	0
251	956.322	(Hex)5	[0](Hex)6	0	0	0	0	0	956.321	956.326	956.331	0	0	0	0	956.325	956.324	956.329	0	956.335	956.335	956.337	956.345	0	0	0	0	0	0.399157	0.350554	0.367008	0	0	0	0	0.38316	0.387627	0.35798	0	0.497685	0.415676	0.355714	0.344077	0	0.27918	0	0.282192	0.403288	0
0	1118.38	(Hex)6	[251](Hex)5	0	0	0	0	0	0	0	0	0	0	0	1118.39	0	1118.37	1118.37	1118.39	0	1118.38	1118.39	1118.39	0	0	0	0	0	0	0	0	0	0	0	0.477899	0	0.501127	0.423719	0.462898	0	0.460257	0.480036	0.386035	0	0	0.119475	0.346936	0.331582	0
1	1200.43	(Hex)4 (HexNAc)2	[3](Hex)2 + (Man)3(GlcNAc)2_x000D_ [5](Hex)1 (HexNAc)1 + (Man)3(GlcNAc)2	0	0	0	1201.15	0	0	1201.18	0	0	1201.18	0	1201.2	0	0	0	0	0	0	0	0	0	0	0	0.980727	0	0	0.594169	0	0	0.94775	0	0.93632	0	0	0	0	0	0	0	0	0.245182	0.148542	0.471018	0	0	0.490363
2	1241.45	(HexNAc)1 + (Man)3(GlcNAc)2	[7](HexNAc)2 + (Man)3(GlcNAc)2_x000D_ [5](Hex)1 (HexNAc)1 + (Man)3(GlcNAc)2_x000D_ [4](HexNAc)1 (Fuc)1 + (Man)3(GlcNAc)2_x000D_ [11](HexNAc)1 (6NeuAc)1 + (Man)3(GlcNAc)2	0	0	0	0	0	0	0	0	0	0	0	0	1241.47	1241.47	1241.47	1241.48	1241.5	1241.49	1241.47	1241.48	0	0	0	0	0	0	0	0	0	0	0	0	0.774247	0.88562	0.759669	0.85196	0.877399	0.844729	0.742951	0.706696	0	0	0	0.817874	0.792944	0
3	1362.48	(Hex)2 + (Man)3(GlcNAc)2	[1](Hex)4 (HexNAc)2_x000D_ [8](Hex)3 + (Man)3(GlcNAc)2_x000D_ [10](Hex)2 (HexNAc)1 + (Man)3(GlcNAc)2	1362.47	1362.48	1362.49	1362.49	1362.49	1362.5	1362.51	1362.51	1362.51	1362.52	1362.54	1362.54	1362.52	1362.52	1362.53	1362.53	1362.53	1362.53	1362.53	1362.54	6.83037	6.66167	6.68553	6.35415	12.1293	12.1873	12.0489	11.4072	21.6278	21.2992	21.2432	21.2815	25.155	24.4069	24.8361	24.5797	29.2372	27.7001	29.9137	28.5375	6.63293	11.9431	21.3629	24.7444	28.8471	0.200244
4	1387.51	(HexNAc)1 (Fuc)1 + (Man)3(GlcNAc)2	[2](HexNAc)1 + (Man)3(GlcNAc)2_x000D_ [12](HexNAc)2 (Fuc)1 + (Man)3(GlcNAc)2_x000D_ [9](Hex)1 (HexNAc)1 (Fuc)1 + (Man)3(GlcNAc)2	0	0	0	0	1387.51	1387.52	1387.53	1387.53	1387.54	1387.55	1387.56	1387.56	1387.54	1387.55	1387.55	1387.56	1387.56	1387.56	1387.56	1387.57	0	0	0	0	0.494736	0.516254	0.476667	0.475437	0.767248	0.668082	0.872573	0.691817	0.70251	0.63877	0.653233	0.607647	0.947916	0.796608	0.978609	0.786102	0	0.490774	0.74993	0.65054	0.877309	0
5	1403.51	(Hex)1 (HexNAc)1 + (Man)3(GlcNAc)2	[1](Hex)4 (HexNAc)2_x000D_ [2](HexNAc)1 + (Man)3(GlcNAc)2_x000D_ [13](Hex)1 (HexNAc)2 + (Man)3(GlcNAc)2_x000D_ [10](Hex)2 (HexNAc)1 + (Man)3(GlcNAc)2_x000D_ [9](Hex)1 (HexNAc)1 (Fuc)1 + (Man)3(GlcNAc)2_x000D_ [20](Hex)1 (HexNAc)1 (6NeuAc)1 + (Man)3(GlcNAc)2_x000D_ [17](Hex)1 (HexNAc)1 (3-8NeuAc)1 + (Man)3(GlcNAc)2	0	0	0	0	1403.5	1403.52	1403.55	1403.55	1403.53	1403.54	1403.55	1403.56	1403.54	1403.53	1403.54	1403.55	1403.55	1403.55	1403.55	1403.56	0	0	0	0	0.959019	0.878016	0.861093	0.817814	1.66915	1.5675	1.81712	1.53191	1.60227	1.65972	1.51804	1.57504	2.50652	1.93572	2.05897	1.8327	0	0.878985	1.64642	1.58877	2.08348	0
6	1442.48	(Hex)8		0	0	0	0	0	0	0	0	0	0	0	0	0	0	0	0	0	1442.54	0	0	0	0	0	0	0	0	0	0	0	0	0	0	0	0	0	0	0	0.447404	0	0	0	0	0	0	0.111851	0
7	1444.53	(HexNAc)2 + (Man)3(GlcNAc)2	[2](HexNAc)1 + (Man)3(GlcNAc)2_x000D_ [14](HexNAc)3 + (Man)3(GlcNAc)2_x000D_ [13](Hex)1 (HexNAc)2 + (Man)3(GlcNAc)2_x000D_ [12](HexNAc)2 (Fuc)1 + (Man)3(GlcNAc)2_x000D_ [15](HexNAc)2 (GlcA)1 + (Man)3(GlcNAc)2	1444.51	1444.53	1444.53	1444.54	1444.54	1444.55	1444.56	1444.56	1444.57	1444.57	1444.59	1444.6	1444.58	1444.58	1444.58	1444.59	1444.59	1444.59	1444.59	1444.6	1.17481	1.10636	1.17374	1.20143	1.81298	1.7897	1.58077	1.58777	2.67382	2.68587	2.64695	2.55102	2.86811	2.77627	2.70953	2.6793	3.44119	2.85355	3.13576	2.83067	1.16409	1.6928	2.63942	2.7583	3.06529	0.040559
8	1524.53	(Hex)3 + (Man)3(GlcNAc)2	[3](Hex)2 + (Man)3(GlcNAc)2_x000D_ [16](Hex)4 + (Man)3(GlcNAc)2_x000D_ [19](Hex)3 (HexNAc)1 + (Man)3(GlcNAc)2	1524.53	1524.54	1524.55	1524.56	1524.55	1524.57	1524.57	1524.57	1524.58	1524.59	1524.61	1524.61	1524.59	1524.59	1524.6	1524.6	1524.6	1524.6	1524.6	1524.61	8.06178	8.00225	7.91594	7.78529	16.2822	16.3604	16.0098	15.4414	28.0533	27.6822	27.5093	27.5745	33.3814	32.4555	32.8933	32.1559	37.6544	36.1975	38.511	37.0347	7.94132	16.0235	27.7048	32.7215	37.3494	0.120017
9	1549.57	(Hex)1 (HexNAc)1 (Fuc)1 + (Man)3(GlcNAc)2	[5](Hex)1 (HexNAc)1 + (Man)3(GlcNAc)2_x000D_ [4](HexNAc)1 (Fuc)1 + (Man)3(GlcNAc)2_x000D_ [21](Hex)1 (HexNAc)2 (Fuc)1 + (Man)3(GlcNAc)2_x000D_ [18](Hex)2 (HexNAc)1 (Fuc)1 + (Man)3(GlcNAc)2_x000D_ [29](Hex)1 (HexNAc)1 (Fuc)1 (6NeuAc)1 + (Man)3(GlcNAc)2	0	0	0	0	1549.58	0	1549.61	0	1549.62	1549.62	1549.64	1549.64	0	1549.62	1549.64	0	1549.64	1549.64	1549.64	1549.65	0	0	0	0	0.559309	0	0.500115	0	0.782464	0.965866	0.821522	0.840796	0	0.981473	0.824053	0	1.08568	0.845062	0.826465	0.818568	0	0.264856	0.852662	0.451382	0.893943	0
10	1565.56	(Hex)2 (HexNAc)1 + (Man)3(GlcNAc)2	[3](Hex)2 + (Man)3(GlcNAc)2_x000D_ [5](Hex)1 (HexNAc)1 + (Man)3(GlcNAc)2_x000D_ [22](Hex)2 (HexNAc)2 + (Man)3(GlcNAc)2_x000D_ [19](Hex)3 (HexNAc)1 + (Man)3(GlcNAc)2_x000D_ [18](Hex)2 (HexNAc)1 (Fuc)1 + (Man)3(GlcNAc)2_x000D_ [30](Hex)2 (HexNAc)1 (6NeuAc)1 + (Man)3(GlcNAc)2_x000D_ [28](Hex)2 (HexNAc)1 (3-8NeuAc)1 + (Man)3(GlcNAc)2	1565.57	1565.58	1565.6	1565.6	1565.57	1565.59	1565.6	1565.6	1565.61	1565.61	1565.63	1565.64	1565.62	1565.61	1565.62	1565.63	1565.63	1565.63	1565.63	1565.64	1.11699	1.0818	1.08972	1.15742	1.76402	1.7378	1.80696	1.61609	2.74621	2.83449	2.63013	2.67038	3.29351	3.13931	3.00917	2.82272	3.64026	3.41295	3.40974	3.18327	1.11149	1.73122	2.7203	3.06618	3.41155	0.034132
11	1573.61	(HexNAc)1 (6NeuAc)1 + (Man)3(GlcNAc)2	[2](HexNAc)1 + (Man)3(GlcNAc)2_x000D_ [20](Hex)1 (HexNAc)1 (6NeuAc)1 + (Man)3(GlcNAc)2	1573.61	0	0	0	1573.63	1573.65	1573.66	1573.66	1573.66	1573.66	1573.68	1573.69	1573.67	1573.67	1573.68	1573.68	1573.68	1573.69	1573.68	1573.69	1.39053	0	0	0	2.49064	2.44242	2.33246	2.30097	3.12987	3.12737	3.05088	3.05716	4.03962	4.41056	3.72915	3.6854	5.72028	5.2772	5.13305	5.0215	0.347633	2.39162	3.09132	3.96618	5.28801	0.695266
12	1590.59	(HexNAc)2 (Fuc)1 + (Man)3(GlcNAc)2	[7](HexNAc)2 + (Man)3(GlcNAc)2_x000D_ [4](HexNAc)1 (Fuc)1 + (Man)3(GlcNAc)2_x000D_ [23](HexNAc)3 (Fuc)1 + (Man)3(GlcNAc)2_x000D_ [21](Hex)1 (HexNAc)2 (Fuc)1 + (Man)3(GlcNAc)2	1590.59	1590.6	1590.62	1590.62	1590.61	1590.63	1590.64	1590.64	1590.64	1590.65	1590.67	1590.67	1590.65	1590.65	1590.66	1590.67	1590.66	1590.67	1590.66	1590.67	25.8513	25.7125	25.586	24.7545	46.7501	47.3825	46.1045	45.7591	78.4152	78.05	77.3493	78.2889	91.8896	90.0513	91.1402	90.8361	107.112	104.944	112.289	109.131	25.4761	46.499	78.0259	90.9793	108.369	0.493121
13	1606.59	(Hex)1 (HexNAc)2 + (Man)3(GlcNAc)2	[7](HexNAc)2 + (Man)3(GlcNAc)2_x000D_ [5](Hex)1 (HexNAc)1 + (Man)3(GlcNAc)2_x000D_ [24](Hex)1 (HexNAc)3 + (Man)3(GlcNAc)2_x000D_ [22](Hex)2 (HexNAc)2 + (Man)3(GlcNAc)2_x000D_ [21](Hex)1 (HexNAc)2 (Fuc)1 + (Man)3(GlcNAc)2_x000D_ [25](Hex)1 (HexNAc)2 (GlcA)1 + (Man)3(GlcNAc)2_x000D_ [33](Hex)1 (HexNAc)2 (6NeuAc)1 + (Man)3(GlcNAc)2	1606.57	1606.59	1606.6	1606.6	1606.6	1606.62	1606.62	1606.62	1606.64	1606.64	1606.66	1606.67	1606.64	1606.64	1606.65	1606.65	1606.65	1606.66	1606.65	1606.66	5.37699	4.88629	4.66356	4.58169	8.4702	8.50273	8.61274	7.91256	8.47945	8.29296	8.23882	8.00943	15.364	14.5814	14.6104	14.2944	18.5358	17.0839	18.0343	17.2241	4.87713	8.37456	8.25517	14.7126	17.7195	0.357231
14	1647.61	(HexNAc)3 + (Man)3(GlcNAc)2	[7](HexNAc)2 + (Man)3(GlcNAc)2_x000D_ [24](Hex)1 (HexNAc)3 + (Man)3(GlcNAc)2_x000D_ [23](HexNAc)3 (Fuc)1 + (Man)3(GlcNAc)2_x000D_ [27](HexNAc)3 (GlcA)1 + (Man)3(GlcNAc)2	1647.65	1647.64	1647.64	1647.66	1647.63	1647.65	1647.66	1647.66	1647.66	1647.67	1647.69	1647.69	1647.67	1647.67	1647.68	1647.68	1647.68	1647.69	1647.68	1647.69	8.12518	7.55513	7.3781	6.90032	8.49844	8.34797	7.67711	7.59981	9.45725	9.62535	9.28992	9.00405	10.8279	10.5988	9.80269	10.0025	11.806	11.3684	11.0231	10.5885	7.48968	8.03083	9.34414	10.308	11.1965	0.505945
15	1661.63	(HexNAc)2 (GlcA)1 + (Man)3(GlcNAc)2	[7](HexNAc)2 + (Man)3(GlcNAc)2_x000D_ [27](HexNAc)3 (GlcA)1 + (Man)3(GlcNAc)2_x000D_ [25](Hex)1 (HexNAc)2 (GlcA)1 + (Man)3(GlcNAc)2	1661.59	0	0	0	0	0	0	0	0	0	0	0	0	0	0	0	0	0	0	0	1.63824	0	0	0	0	0	0	0	0	0	0	0	0	0	0	0	0	0	0	0	0.409559	0	0	0	0	0.819119
16	1686.59	(Hex)4 + (Man)3(GlcNAc)2	[8](Hex)3 + (Man)3(GlcNAc)2_x000D_ [26](Hex)5 + (Man)3(GlcNAc)2	1686.59	1686.6	1686.61	1686.62	1686.61	1686.63	1686.64	1686.64	1686.64	1686.65	1686.67	1686.68	1686.66	1686.66	1686.66	1686.67	1686.67	1686.67	1686.67	1686.68	3.51944	3.44527	3.42282	3.29752	5.82771	5.66723	5.48096	5.30312	9.01396	8.72589	8.79379	8.52877	10.5246	10.1241	10.0043	9.68659	11.3286	10.7099	10.9061	10.3408	3.42126	5.56976	8.7656	10.0849	10.8213	0.09225
17	1707.63	(Hex)1 (HexNAc)1 (3-8NeuAc)1 + (Man)3(GlcNAc)2	[5](Hex)1 (HexNAc)1 + (Man)3(GlcNAc)2_x000D_ [28](Hex)2 (HexNAc)1 (3-8NeuAc)1 + (Man)3(GlcNAc)2	0	0	0	0	0	0	0	0	0	1707.69	1707.72	0	1707.69	1707.69	1707.69	1707.7	1707.73	1707.71	1707.7	1707.72	0	0	0	0	0	0	0	0	0	0.769961	0.958043	0	0.851095	0.911898	0.812622	0.836596	1.28766	0.965688	0.986241	0.869085	0	0	0.432001	0.853053	1.02717	0
18	1711.62	(Hex)2 (HexNAc)1 (Fuc)1 + (Man)3(GlcNAc)2	[10](Hex)2 (HexNAc)1 + (Man)3(GlcNAc)2_x000D_ [9](Hex)1 (HexNAc)1 (Fuc)1 + (Man)3(GlcNAc)2_x000D_ [31](Hex)2 (HexNAc)2 (Fuc)1 + (Man)3(GlcNAc)2	0	0	0	0	0	0	0	0	0	0	0	0	0	0	0	0	0	0	0	1711.72	0	0	0	0	0	0	0	0	0	0	0	0	0	0	0	0	0	0	0	0.37274	0	0	0	0	0.093185	0
19	1727.61	(Hex)3 (HexNAc)1 + (Man)3(GlcNAc)2	[8](Hex)3 + (Man)3(GlcNAc)2_x000D_ [10](Hex)2 (HexNAc)1 + (Man)3(GlcNAc)2_x000D_ [32](Hex)3 (HexNAc)2 + (Man)3(GlcNAc)2_x000D_ [43](Hex)3 (HexNAc)1 (6NeuAc)1 + (Man)3(GlcNAc)2_x000D_ [40](Hex)3 (HexNAc)1 (3-8NeuAc)1 + (Man)3(GlcNAc)2	1727.73	1727.75	1727.76	1727.77	1727.73	1727.75	1727.76	1727.77	1727.73	1727.75	1727.77	1727.77	1727.74	1727.73	1727.75	1727.75	1727.74	1727.74	1727.72	1727.72	2.45706	2.3901	2.30264	1.87476	3.34437	3.3746	3.1734	3.18658	4.21437	4.07812	4.25834	4.00038	4.88963	4.79046	4.59527	4.56401	5.45796	4.85271	4.80318	4.40737	2.25614	3.26974	4.1378	4.70984	4.88031	0.261997
20	1735.67	(Hex)1 (HexNAc)1 (6NeuAc)1 + (Man)3(GlcNAc)2	[5](Hex)1 (HexNAc)1 + (Man)3(GlcNAc)2_x000D_ [11](HexNAc)1 (6NeuAc)1 + (Man)3(GlcNAc)2_x000D_ [33](Hex)1 (HexNAc)2 (6NeuAc)1 + (Man)3(GlcNAc)2_x000D_ [30](Hex)2 (HexNAc)1 (6NeuAc)1 + (Man)3(GlcNAc)2_x000D_ [29](Hex)1 (HexNAc)1 (Fuc)1 (6NeuAc)1 + (Man)3(GlcNAc)2	1735.66	1735.67	1735.69	1735.69	1735.68	1735.7	1735.71	1735.71	1735.72	1735.72	1735.75	1735.75	1735.73	1735.73	1735.74	1735.74	1735.74	1735.74	1735.74	1735.75	4.32067	4.16963	3.99043	3.83811	7.24041	7.32025	6.74017	6.71139	10.4452	9.90728	10.1068	9.84361	11.7532	11.5804	11.1805	10.9069	14.9165	13.7368	13.4143	12.7938	4.07971	7.00305	10.0757	11.3553	13.7153	0.210149
21	1752.64	(Hex)1 (HexNAc)2 (Fuc)1 + (Man)3(GlcNAc)2	[13](Hex)1 (HexNAc)2 + (Man)3(GlcNAc)2_x000D_ [12](HexNAc)2 (Fuc)1 + (Man)3(GlcNAc)2_x000D_ [9](Hex)1 (HexNAc)1 (Fuc)1 + (Man)3(GlcNAc)2_x000D_ [34](Hex)1 (HexNAc)3 (Fuc)1 + (Man)3(GlcNAc)2_x000D_ [31](Hex)2 (HexNAc)2 (Fuc)1 + (Man)3(GlcNAc)2_x000D_ [45](Hex)1 (HexNAc)2 (Fuc)1 (6NeuAc)1 + (Man)3(GlcNAc)2	1752.65	1752.66	1752.68	1752.68	1752.67	1752.69	1752.7	1752.7	1752.71	1752.71	1752.74	1752.74	1752.72	1752.72	1752.73	1752.73	1752.73	1752.73	1752.73	1752.74	37.2198	37.0177	37.0378	36.5647	68.8807	72.2043	69.9851	67.9416	117.348	116.859	116.683	117.114	140.565	137.819	140.33	140.243	167.816	164.399	172.844	170.339	36.96	69.7529	117.001	139.739	168.85	0.278799
22	1768.64	(Hex)2 (HexNAc)2 + (Man)3(GlcNAc)2	[13](Hex)1 (HexNAc)2 + (Man)3(GlcNAc)2_x000D_ [10](Hex)2 (HexNAc)1 + (Man)3(GlcNAc)2_x000D_ [35](Hex)2 (HexNAc)3 + (Man)3(GlcNAc)2_x000D_ [32](Hex)3 (HexNAc)2 + (Man)3(GlcNAc)2_x000D_ [31](Hex)2 (HexNAc)2 (Fuc)1 + (Man)3(GlcNAc)2_x000D_ [47](Hex)2 (HexNAc)2 (6NeuAc)1 + (Man)3(GlcNAc)2_x000D_ [44](Hex)2 (HexNAc)2 (3-8NeuAc)1 + (Man)3(GlcNAc)2	1768.63	1768.65	1768.66	1768.66	1768.66	1768.68	1768.69	1768.69	1768.7	1768.71	1768.73	1768.73	1768.71	1768.71	1768.72	1768.72	1768.72	1768.72	1768.72	1768.73	8.1106	7.48415	7.30201	7.08234	14.2997	14.3167	14.4948	13.5586	14.5166	14.5717	14.0294	13.9147	28.2391	27.041	27.1609	26.3778	32.2407	30.7582	31.641	30.6475	7.49477	14.1674	14.2581	27.2047	31.3219	0.442195
23	1793.67	(HexNAc)3 (Fuc)1 + (Man)3(GlcNAc)2	[14](HexNAc)3 + (Man)3(GlcNAc)2_x000D_ [12](HexNAc)2 (Fuc)1 + (Man)3(GlcNAc)2_x000D_ [36](HexNAc)4 (Fuc)1 + (Man)3(GlcNAc)2_x000D_ [34](Hex)1 (HexNAc)3 (Fuc)1 + (Man)3(GlcNAc)2_x000D_ [38](HexNAc)3 (Fuc)1 (GlcA)1 + (Man)3(GlcNAc)2_x000D_ [46](HexNAc)3 (Fuc)1 (3-8NeuAc)1 + (Man)3(GlcNAc)2	1793.67	1793.69	1793.7	1793.7	1793.7	1793.72	1793.73	1793.73	1793.74	1793.74	1793.76	1793.77	1793.75	1793.75	1793.76	1793.76	1793.76	1793.76	1793.76	1793.77	5.90314	5.80731	5.60057	5.46366	9.68868	9.58937	9.35903	9.07398	14.5546	14.2119	14.2244	13.8963	17.3733	16.8405	16.0626	16.2021	19.9148	18.9772	18.9617	18.0724	5.69367	9.42777	14.2218	16.6196	18.9815	0.198634
24	1809.67	(Hex)1 (HexNAc)3 + (Man)3(GlcNAc)2	[14](HexNAc)3 + (Man)3(GlcNAc)2_x000D_ [13](Hex)1 (HexNAc)2 + (Man)3(GlcNAc)2_x000D_ [35](Hex)2 (HexNAc)3 + (Man)3(GlcNAc)2_x000D_ [34](Hex)1 (HexNAc)3 (Fuc)1 + (Man)3(GlcNAc)2_x000D_ [39](Hex)1 (HexNAc)3 (GlcA)1 + (Man)3(GlcNAc)2_x000D_ [50](Hex)1 (HexNAc)3 (6NeuAc)1 + (Man)3(GlcNAc)2	1809.66	1809.67	1809.69	1809.69	1809.69	1809.71	1809.72	1809.72	1809.73	1809.73	1809.76	1809.76	1809.74	1809.74	1809.75	1809.75	1809.75	1809.75	1809.75	1809.76	3.9619	3.74639	3.53555	3.44479	6.40068	6.34026	6.086	5.8368	8.08717	8.05904	7.90627	7.72271	11.5604	11.1344	10.4598	10.5101	13.0504	12.195	12.1826	11.4319	3.67216	6.16593	7.9438	10.9162	12.215	0.230806
25	1823.68	(Hex)1 (HexNAc)2 (GlcA)1 + (Man)3(GlcNAc)2	[13](Hex)1 (HexNAc)2 + (Man)3(GlcNAc)2_x000D_ [15](HexNAc)2 (GlcA)1 + (Man)3(GlcNAc)2_x000D_ [39](Hex)1 (HexNAc)3 (GlcA)1 + (Man)3(GlcNAc)2	0	0	1823.65	0	0	0	1823.66	0	0	0	0	1823.58	1823.61	1823.59	0	1823.97	1823.78	1823.67	0	0	0	0	4.60829	0	0	0	6.08699	0	0	0	0	7.13949	11.9492	11.0776	0	9.1002	13.6955	10.873	0	0	1.15207	1.52175	1.78487	8.03177	6.1421	2.30415
26	1848.64	(Hex)5 + (Man)3(GlcNAc)2	[16](Hex)4 + (Man)3(GlcNAc)2_x000D_ [37](Hex)6 + (Man)3(GlcNAc)2_x000D_ [41](Hex)5 (HexNAc)1 + (Man)3(GlcNAc)2	0	1848.66	1848.68	0	1848.67	1848.7	1848.7	1848.7	1848.71	1848.71	1848.74	1848.74	1848.72	1848.72	1848.73	1848.73	1848.73	1848.73	1848.73	1848.74	0	3.5015	3.36595	0	7.116	0.653709	6.64094	6.60414	10.975	10.7091	10.6091	10.3835	13.8534	13.3545	12.9604	12.5059	15.5544	14.6669	14.4061	13.1683	1.71686	5.2537	10.6692	13.1686	14.449	1.98324
27	1864.71	(HexNAc)3 (GlcA)1 + (Man)3(GlcNAc)2	[14](HexNAc)3 + (Man)3(GlcNAc)2_x000D_ [15](HexNAc)2 (GlcA)1 + (Man)3(GlcNAc)2_x000D_ [39](Hex)1 (HexNAc)3 (GlcA)1 + (Man)3(GlcNAc)2_x000D_ [38](HexNAc)3 (Fuc)1 (GlcA)1 + (Man)3(GlcNAc)2	0	0	0	0	0	0	1864.67	1864.67	0	0	0	0	1864.7	1864.7	1864.71	1864.71	0	1864.71	1864.71	1864.72	0	0	0	0	0	0	0.832043	0.779763	0	0	0	0	1.54376	1.5508	1.46238	1.3411	0	1.33862	1.39693	1.24727	0	0.402952	0	1.47451	0.995705	0
28	1869.69	(Hex)2 (HexNAc)1 (3-8NeuAc)1 + (Man)3(GlcNAc)2	[10](Hex)2 (HexNAc)1 + (Man)3(GlcNAc)2_x000D_ [17](Hex)1 (HexNAc)1 (3-8NeuAc)1 + (Man)3(GlcNAc)2_x000D_ [44](Hex)2 (HexNAc)2 (3-8NeuAc)1 + (Man)3(GlcNAc)2_x000D_ [40](Hex)3 (HexNAc)1 (3-8NeuAc)1 + (Man)3(GlcNAc)2	0	0	0	0	1869.7	1869.72	1869.73	1869.73	1869.74	1869.75	1869.77	1869.78	1869.75	1869.75	1869.77	1869.77	1869.77	1869.77	1869.77	1869.78	0	0	0	0	1.12247	1.10915	0.986474	1.00263	1.48315	1.45967	1.52802	1.30055	1.76445	1.86333	1.72196	1.53171	2.13073	1.77096	1.76188	1.57295	0	1.05518	1.44285	1.72036	1.80913	0
29	1881.72	(Hex)1 (HexNAc)1 (Fuc)1 (6NeuAc)1 + (Man)3(GlcNAc)2	[9](Hex)1 (HexNAc)1 (Fuc)1 + (Man)3(GlcNAc)2_x000D_ [20](Hex)1 (HexNAc)1 (6NeuAc)1 + (Man)3(GlcNAc)2_x000D_ [45](Hex)1 (HexNAc)2 (Fuc)1 (6NeuAc)1 + (Man)3(GlcNAc)2	0	0	0	0	1881.75	0	0	1881.78	1881.78	1881.79	1881.81	1881.82	0	0	0	1881.81	1881.81	1881.81	1881.81	1881.82	0	0	0	0	0.87465	0	0	0.820222	1.2445	1.23066	1.20023	1.11912	0	0	0	1.35313	1.6351	1.54879	1.46933	1.30511	0	0.423718	1.19863	0.338283	1.48958	0
30	1897.72	(Hex)2 (HexNAc)1 (6NeuAc)1 + (Man)3(GlcNAc)2	[10](Hex)2 (HexNAc)1 + (Man)3(GlcNAc)2_x000D_ [20](Hex)1 (HexNAc)1 (6NeuAc)1 + (Man)3(GlcNAc)2_x000D_ [47](Hex)2 (HexNAc)2 (6NeuAc)1 + (Man)3(GlcNAc)2_x000D_ [43](Hex)3 (HexNAc)1 (6NeuAc)1 + (Man)3(GlcNAc)2	1897.72	1897.74	1897.75	1897.75	1897.75	1897.77	1897.78	1897.78	1897.78	1897.79	1897.81	1897.82	1897.8	1897.8	1897.81	1897.81	1897.81	1897.81	1897.81	1897.82	12.0309	11.7866	11.6244	11.3122	15.8729	16.6289	16.07	15.8369	17.9784	17.7007	17.6251	16.8285	20.5979	19.3466	19.6501	18.365	21.9539	21.4983	21.3622	20.6097	11.6885	16.1022	17.5332	19.4899	21.356	0.301431
31	1914.7	(Hex)2 (HexNAc)2 (Fuc)1 + (Man)3(GlcNAc)2	[22](Hex)2 (HexNAc)2 + (Man)3(GlcNAc)2_x000D_ [21](Hex)1 (HexNAc)2 (Fuc)1 + (Man)3(GlcNAc)2_x000D_ [18](Hex)2 (HexNAc)1 (Fuc)1 + (Man)3(GlcNAc)2_x000D_ [48](Hex)2 (HexNAc)3 (Fuc)1 + (Man)3(GlcNAc)2_x000D_ [63](Hex)2 (HexNAc)2 (Fuc)1 (6NeuAc)1 + (Man)3(GlcNAc)2_x000D_ [60](Hex)2 (HexNAc)2 (Fuc)1 (3-8NeuAc)1 + (Man)3(GlcNAc)2	1914.7	1914.72	1914.73	1914.74	1914.73	1914.75	1914.76	1914.76	1914.77	1914.77	1914.8	1914.8	1914.78	1914.78	1914.79	1914.8	1914.8	1914.8	1914.8	1914.81	17.7436	17.3988	17.2353	17.1014	35.3525	35.6955	35.3058	34.4837	57.6995	57.1236	55.4623	56.459	73.4004	72.0869	73.0472	71.9689	86.3839	84.6373	86.7659	84.8823	17.3698	35.2094	56.6861	72.6259	85.6674	0.277321
32	1930.69	(Hex)3 (HexNAc)2 + (Man)3(GlcNAc)2	[22](Hex)2 (HexNAc)2 + (Man)3(GlcNAc)2_x000D_ [19](Hex)3 (HexNAc)1 + (Man)3(GlcNAc)2_x000D_ [49](Hex)3 (HexNAc)3 + (Man)3(GlcNAc)2_x000D_ [66](Hex)3 (HexNAc)2 (6NeuAc)1 + (Man)3(GlcNAc)2	1930.68	1930.69	1930.7	1930.71	1930.7	1930.73	1930.74	1930.74	1930.74	1930.75	1930.77	1930.78	1930.76	1930.76	1930.77	1930.77	1930.77	1930.77	1930.77	1930.78	1.91065	1.75348	1.7311	1.65924	3.058	3.00183	3.16008	2.85832	1.65273	1.66088	1.502	1.50632	5.38495	5.0374	4.9905	4.78758	6.22713	5.74564	5.81409	5.53609	1.76362	3.01956	1.58048	5.05011	5.83074	0.105942
33	1938.74	(Hex)1 (HexNAc)2 (6NeuAc)1 + (Man)3(GlcNAc)2	[13](Hex)1 (HexNAc)2 + (Man)3(GlcNAc)2_x000D_ [20](Hex)1 (HexNAc)1 (6NeuAc)1 + (Man)3(GlcNAc)2_x000D_ [50](Hex)1 (HexNAc)3 (6NeuAc)1 + (Man)3(GlcNAc)2_x000D_ [47](Hex)2 (HexNAc)2 (6NeuAc)1 + (Man)3(GlcNAc)2_x000D_ [45](Hex)1 (HexNAc)2 (Fuc)1 (6NeuAc)1 + (Man)3(GlcNAc)2_x000D_ [68](Hex)1 (HexNAc)2 (6NeuAc)2 + (Man)3(GlcNAc)2	1938.74	1938.76	1938.77	1938.78	1938.78	1938.8	1938.8	1938.81	1938.81	1938.82	1938.84	1938.85	1938.82	1938.82	1938.83	1938.84	1938.84	1938.84	1938.84	1938.85	8.13896	7.93646	7.42583	7.37757	10.0362	10.0444	9.36022	9.39668	12.2698	12.1335	12.0738	11.5284	14.864	14.5168	14.0329	13.5267	17.57	16.2167	16.4212	14.9045	7.7197	9.70937	12.0014	14.2351	16.2781	0.376907
34	1955.72	(Hex)1 (HexNAc)3 (Fuc)1 + (Man)3(GlcNAc)2	[24](Hex)1 (HexNAc)3 + (Man)3(GlcNAc)2_x000D_ [23](HexNAc)3 (Fuc)1 + (Man)3(GlcNAc)2_x000D_ [21](Hex)1 (HexNAc)2 (Fuc)1 + (Man)3(GlcNAc)2_x000D_ [53](Hex)1 (HexNAc)4 (Fuc)1 + (Man)3(GlcNAc)2_x000D_ [48](Hex)2 (HexNAc)3 (Fuc)1 + (Man)3(GlcNAc)2_x000D_ [56](Hex)1 (HexNAc)3 (Fuc)1 (GlcA)1 + (Man)3(GlcNAc)2_x000D_ [71](Hex)1 (HexNAc)3 (Fuc)1 (6NeuAc)1 + (Man)3(GlcNAc)2	1955.73	1955.74	1955.76	1955.76	1955.76	1955.78	1955.79	1955.79	1955.79	1955.8	1955.83	1955.83	1955.81	1955.81	1955.82	1955.82	1955.82	1955.83	1955.82	1955.84	8.16939	7.98077	7.69536	7.69165	15.3284	15.3941	14.8385	14.3892	23.2718	22.6729	22.5663	22.4203	29.1274	28.1408	27.9464	27.0899	33.6635	32.9569	33.6308	32.246	7.88429	14.9875	22.7328	28.0761	33.1243	0.23338
35	1971.72	(Hex)2 (HexNAc)3 + (Man)3(GlcNAc)2	[24](Hex)1 (HexNAc)3 + (Man)3(GlcNAc)2_x000D_ [22](Hex)2 (HexNAc)2 + (Man)3(GlcNAc)2_x000D_ [49](Hex)3 (HexNAc)3 + (Man)3(GlcNAc)2_x000D_ [48](Hex)2 (HexNAc)3 (Fuc)1 + (Man)3(GlcNAc)2_x000D_ [57](Hex)2 (HexNAc)3 (GlcA)1 + (Man)3(GlcNAc)2_x000D_ [75](Hex)2 (HexNAc)3 (6NeuAc)1 + (Man)3(GlcNAc)2	1971.72	1971.7	1971.73	1971.74	1971.74	1971.75	1971.77	1971.77	1971.78	1971.78	1971.81	1971.82	1971.79	1971.79	1971.8	1971.81	1971.81	1971.81	1971.81	1971.82	3.58888	3.57001	2.02997	1.84874	5.79022	5.88362	5.36188	5.37684	5.78806	6.03857	5.57578	5.55765	9.67831	9.15192	8.74657	8.27507	11.1976	9.95452	10.2669	8.92846	2.7594	5.60314	5.74002	8.96297	10.0869	0.949822
36	1996.75	(HexNAc)4 (Fuc)1 + (Man)3(GlcNAc)2	[23](HexNAc)3 (Fuc)1 + (Man)3(GlcNAc)2_x000D_ [53](Hex)1 (HexNAc)4 (Fuc)1 + (Man)3(GlcNAc)2_x000D_ [51](HexNAc)4 (Fuc)2 + (Man)3(GlcNAc)2	0	0	0	0	0	0	0	0	0	0	0	0	0	1996.75	1996.77	1996.82	0	0	1996.78	1996.85	0	0	0	0	0	0	0	0	0	0	0	0	0	24.1449	25.8243	25.0061	0	0	27.2042	26.4412	0	0	0	18.7438	13.4113	0
37	2010.69	(Hex)6 + (Man)3(GlcNAc)2	[26](Hex)5 + (Man)3(GlcNAc)2_x000D_ [55](Hex)7 + (Man)3(GlcNAc)2	2010.7	2010.71	2010.73	2010.73	2010.73	2010.75	2010.76	2010.76	2010.77	2010.77	2010.8	2010.8	2010.78	2010.78	2010.79	2010.8	2010.8	2010.8	2010.8	2010.81	5.97033	5.81234	5.81659	5.7113	12.6352	12.6177	12.3788	11.9916	18.8387	18.4947	18.4791	18.1711	25.2952	24.2146	24.4774	23.5528	27.3961	26.9826	27.3009	26.1101	5.82764	12.4058	18.4959	24.385	26.9474	0.106853
38	2010.77	(HexNAc)3 (Fuc)1 (GlcA)1 + (Man)3(GlcNAc)2	[23](HexNAc)3 (Fuc)1 + (Man)3(GlcNAc)2_x000D_ [27](HexNAc)3 (GlcA)1 + (Man)3(GlcNAc)2_x000D_ [56](Hex)1 (HexNAc)3 (Fuc)1 (GlcA)1 + (Man)3(GlcNAc)2	2010.7	2010.71	2010.73	2010.73	2010.73	2010.75	2010.76	2010.76	2010.77	2010.77	2010.8	2010.8	2010.78	2010.78	2010.79	2010.8	2010.8	2010.8	2010.8	2010.81	5.97033	5.81234	5.81659	5.7113	12.6352	12.6177	12.3788	11.9916	18.8387	18.4947	18.4791	18.1711	25.2952	24.2146	24.4774	23.5528	27.3961	26.9826	27.3009	26.1101	5.82764	12.4058	18.4959	24.385	26.9474	0.106853
39	2026.76	(Hex)1 (HexNAc)3 (GlcA)1 + (Man)3(GlcNAc)2	[24](Hex)1 (HexNAc)3 + (Man)3(GlcNAc)2_x000D_ [27](HexNAc)3 (GlcA)1 + (Man)3(GlcNAc)2_x000D_ [25](Hex)1 (HexNAc)2 (GlcA)1 + (Man)3(GlcNAc)2_x000D_ [61](Hex)1 (HexNAc)4 (GlcA)1 + (Man)3(GlcNAc)2_x000D_ [57](Hex)2 (HexNAc)3 (GlcA)1 + (Man)3(GlcNAc)2_x000D_ [56](Hex)1 (HexNAc)3 (Fuc)1 (GlcA)1 + (Man)3(GlcNAc)2	0	0	2026.81	0	2026.81	2026.82	2026.83	2026.82	2026.8	2026.89	2026.86	2026.85	2026.78	2026.76	2026.79	2026.79	2026.8	2026.8	2026.8	2026.81	0	0	4.17227	0	4.48567	4.4497	4.32543	4.1819	3.81455	3.92135	3.6397	3.47281	4.20234	4.04691	3.75801	3.56654	5.1047	4.76858	4.69072	4.60669	1.04307	4.36067	3.71211	3.89345	4.79267	2.08613
40	2031.74	(Hex)3 (HexNAc)1 (3-8NeuAc)1 + (Man)3(GlcNAc)2	[19](Hex)3 (HexNAc)1 + (Man)3(GlcNAc)2_x000D_ [28](Hex)2 (HexNAc)1 (3-8NeuAc)1 + (Man)3(GlcNAc)2	0	0	0	0	0	0	0	2031.81	2031.78	2031.85	0	2031.88	2031.82	2031.8	2031.82	2031.84	2031.86	2031.85	2031.84	2031.85	0	0	0	0	0	0	0	1.5835	1.72399	1.72038	0	1.59246	1.75671	1.96644	1.49394	1.61174	2.48454	2.01341	1.81232	1.68158	0	0.395875	1.25921	1.70721	1.99796	0
41	2051.72	(Hex)5 (HexNAc)1 + (Man)3(GlcNAc)2	[26](Hex)5 + (Man)3(GlcNAc)2_x000D_ [65](Hex)5 (HexNAc)2 + (Man)3(GlcNAc)2_x000D_ [58](Hex)5 (HexNAc)1 (Fuc)1 + (Man)3(GlcNAc)2_x000D_ [90](Hex)5 (HexNAc)1 (6NeuAc)1 + (Man)3(GlcNAc)2	0	0	0	0	2051.78	0	0	2051.81	0	0	0	0	0	0	0	0	0	2051.86	2051.86	2051.87	0	0	0	0	1.03383	0	0	0.844882	0	0	0	0	0	0	0	0	0	1.01428	1.12729	0.944981	0	0.469677	0	0	0.771637	0
42	2053.77	(HexNAc)5 + (Man)3(GlcNAc)2	[67](HexNAc)5 (GlcA)1 + (Man)3(GlcNAc)2_x000D_ [92](HexNAc)5 (6NeuAc)1 + (Man)3(GlcNAc)2	0	0	0	0	0	0	0	0	0	2053.71	2053.82	2054.14	0	2054.05	0	0	2054.09	2054.06	2054.08	2054.08	0	0	0	0	0	0	0	0	0	16.4885	16.0323	12.1099	0	12.3901	0	0	10.8855	10.5101	10.1018	9.17652	0	0	11.1577	3.09753	10.1685	0
43	2059.77	(Hex)3 (HexNAc)1 (6NeuAc)1 + (Man)3(GlcNAc)2	[19](Hex)3 (HexNAc)1 + (Man)3(GlcNAc)2_x000D_ [30](Hex)2 (HexNAc)1 (6NeuAc)1 + (Man)3(GlcNAc)2_x000D_ [66](Hex)3 (HexNAc)2 (6NeuAc)1 + (Man)3(GlcNAc)2_x000D_ [59](Hex)3 (HexNAc)1 (Fuc)1 (6NeuAc)1 + (Man)3(GlcNAc)2	2059.76	2059.77	2059.81	2059.82	2059.79	2059.81	2059.83	2059.82	2059.84	2059.85	2059.87	2059.88	2059.86	2059.85	2059.87	2059.87	2059.87	2059.87	2059.87	2059.88	4.20263	4.31301	2.71048	3.76827	8.01179	8.18363	7.33779	7.45123	10.1175	9.86801	9.53775	9.31262	13.0582	12.9996	11.9831	11.3425	14.8627	14.1043	13.3517	12.3866	3.7486	7.74611	9.70898	12.3459	13.6763	0.730932
44	2072.77	(Hex)2 (HexNAc)2 (3-8NeuAc)1 + (Man)3(GlcNAc)2	[22](Hex)2 (HexNAc)2 + (Man)3(GlcNAc)2_x000D_ [28](Hex)2 (HexNAc)1 (3-8NeuAc)1 + (Man)3(GlcNAc)2_x000D_ [60](Hex)2 (HexNAc)2 (Fuc)1 (3-8NeuAc)1 + (Man)3(GlcNAc)2_x000D_ [73](Hex)2 (HexNAc)2 (3-8NeuAc)1 (GlcA)1 + (Man)3(GlcNAc)2_x000D_ [93](Hex)2 (HexNAc)2 (3-8NeuAc)1 (6NeuAc)1 + (Man)3(GlcNAc)2_x000D_ [89](Hex)2 (HexNAc)2 (3-8NeuAc)2 + (Man)3(GlcNAc)2	2072.77	2072.78	2072.79	2072.8	2072.79	2072.81	2072.82	2072.82	2072.83	2072.84	2072.87	2072.87	2072.85	2072.84	2072.86	2072.86	2072.86	2072.87	2072.86	2072.88	5.30755	5.22215	5.06042	4.95172	10.4857	10.3371	9.87621	9.81736	13.7793	13.0295	13.8737	13.0052	18.6687	18.6276	17.7714	17.4264	22.9531	20.9701	20.4541	19.3205	5.13546	10.1291	13.422	18.1235	20.9245	0.159712
45	2084.8	(Hex)1 (HexNAc)2 (Fuc)1 (6NeuAc)1 + (Man)3(GlcNAc)2	[21](Hex)1 (HexNAc)2 (Fuc)1 + (Man)3(GlcNAc)2_x000D_ [33](Hex)1 (HexNAc)2 (6NeuAc)1 + (Man)3(GlcNAc)2_x000D_ [29](Hex)1 (HexNAc)1 (Fuc)1 (6NeuAc)1 + (Man)3(GlcNAc)2_x000D_ [71](Hex)1 (HexNAc)3 (Fuc)1 (6NeuAc)1 + (Man)3(GlcNAc)2_x000D_ [63](Hex)2 (HexNAc)2 (Fuc)1 (6NeuAc)1 + (Man)3(GlcNAc)2	2084.8	2084.82	2084.83	2084.83	2084.82	2084.85	2084.86	2084.86	2084.86	2084.87	2084.9	2084.9	2084.88	2084.88	2084.89	2084.9	2084.9	2084.9	2084.89	2084.91	4.03138	3.83838	3.84965	3.8043	7.36607	7.37927	6.87124	6.98296	9.90944	9.86049	9.423	9.2971	12.0318	12.0566	11.5928	11.1932	13.8077	13.4256	13.0369	12.2828	3.88093	7.14988	9.62251	11.7186	13.1382	0.102138
46	2097.8	(HexNAc)3 (Fuc)1 (3-8NeuAc)1 + (Man)3(GlcNAc)2	[23](HexNAc)3 (Fuc)1 + (Man)3(GlcNAc)2	0	0	0	0	0	0	0	0	0	0	0	0	0	2097.86	0	0	0	0	0	0	0	0	0	0	0	0	0	0	0	0	0	0	0	1.05334	0	0	0	0	0	0	0	0	0	0.263336	0	0
47	2100.8	(Hex)2 (HexNAc)2 (6NeuAc)1 + (Man)3(GlcNAc)2	[22](Hex)2 (HexNAc)2 + (Man)3(GlcNAc)2_x000D_ [33](Hex)1 (HexNAc)2 (6NeuAc)1 + (Man)3(GlcNAc)2_x000D_ [30](Hex)2 (HexNAc)1 (6NeuAc)1 + (Man)3(GlcNAc)2_x000D_ [75](Hex)2 (HexNAc)3 (6NeuAc)1 + (Man)3(GlcNAc)2_x000D_ [66](Hex)3 (HexNAc)2 (6NeuAc)1 + (Man)3(GlcNAc)2_x000D_ [63](Hex)2 (HexNAc)2 (Fuc)1 (6NeuAc)1 + (Man)3(GlcNAc)2_x000D_ [76](Hex)2 (HexNAc)2 (6NeuAc)1 (GlcA)1 + (Man)3(GlcNAc)2_x000D_ [9…	2100.8	2100.82	2100.83	2100.84	2100.83	2100.85	2100.87	2100.87	2100.87	2100.88	2100.91	2100.91	2100.9	2100.89	2100.9	2100.91	2100.91	2100.92	2100.91	2100.92	80.2928	80.0036	79.5371	79.4874	173.123	174.117	174.501	172.804	249.47	248.731	248.467	246.043	332.518	329.181	328.849	326.882	399.114	399.124	403.901	403.043	79.8302	173.636	248.178	329.357	401.296	0.386224
48	2117.78	(Hex)2 (HexNAc)3 (Fuc)1 + (Man)3(GlcNAc)2	[35](Hex)2 (HexNAc)3 + (Man)3(GlcNAc)2_x000D_ [34](Hex)1 (HexNAc)3 (Fuc)1 + (Man)3(GlcNAc)2_x000D_ [31](Hex)2 (HexNAc)2 (Fuc)1 + (Man)3(GlcNAc)2_x000D_ [78](Hex)2 (HexNAc)4 (Fuc)1 + (Man)3(GlcNAc)2_x000D_ [98](Hex)2 (HexNAc)3 (Fuc)1 (6NeuAc)1 + (Man)3(GlcNAc)2	0	0	0	0	0	0	0	0	2117.85	2117.86	2117.89	2117.89	0	0	0	0	0	0	0	0	0	0	0	0	0	0	0	0	16.5564	16.4224	15.829	15.6181	0	0	0	0	0	0	0	0	0	0	16.1065	0	0	0
49	2133.77	(Hex)3 (HexNAc)3 + (Man)3(GlcNAc)2	[35](Hex)2 (HexNAc)3 + (Man)3(GlcNAc)2_x000D_ [32](Hex)3 (HexNAc)2 + (Man)3(GlcNAc)2_x000D_ [74](Hex)4 (HexNAc)3 + (Man)3(GlcNAc)2_x000D_ [99](Hex)3 (HexNAc)3 (6NeuAc)1 + (Man)3(GlcNAc)2	0	0	0	0	2133.78	2133.81	2133.82	2133.84	0	0	0	0	2133.84	2133.85	2133.86	2133.86	2133.86	2133.87	2133.86	2133.88	0	0	0	0	1.15492	1.36077	1.22871	0.549587	0	0	0	0	1.89503	2.37777	2.33424	2.01001	2.7027	2.3743	2.39485	2.36944	0	1.0735	0	2.15426	2.46032	0
50	2141.82	(Hex)1 (HexNAc)3 (6NeuAc)1 + (Man)3(GlcNAc)2	[24](Hex)1 (HexNAc)3 + (Man)3(GlcNAc)2_x000D_ [33](Hex)1 (HexNAc)2 (6NeuAc)1 + (Man)3(GlcNAc)2_x000D_ [83](Hex)1 (HexNAc)4 (6NeuAc)1 + (Man)3(GlcNAc)2_x000D_ [75](Hex)2 (HexNAc)3 (6NeuAc)1 + (Man)3(GlcNAc)2_x000D_ [71](Hex)1 (HexNAc)3 (Fuc)1 (6NeuAc)1 + (Man)3(GlcNAc)2	0	0	0	0	2141.84	2141.87	2141.88	2141.88	2141.89	2141.9	2141.93	2141.93	2141.91	2141.91	2141.92	2141.92	2141.93	2141.93	2141.93	2141.94	0	0	0	0	17.04	17.0478	16.6483	16.1472	17.8827	17.9709	17.2881	16.9284	26.9061	26.053	25.1288	24.0077	29.4949	28.359	27.6402	26.5598	0	16.7208	17.5175	25.5239	28.0135	0
51	2142.81	(HexNAc)4 (Fuc)2 + (Man)3(GlcNAc)2	[36](HexNAc)4 (Fuc)1 + (Man)3(GlcNAc)2_x000D_ [84](HexNAc)5 (Fuc)2 + (Man)3(GlcNAc)2_x000D_ [72](HexNAc)4 (Fuc)3 + (Man)3(GlcNAc)2_x000D_ [86](HexNAc)4 (Fuc)2 (GlcA)1 + (Man)3(GlcNAc)2_x000D_ [100](HexNAc)4 (Fuc)2 (6NeuAc)1 + (Man)3(GlcNAc)2	2142.82	2142.83	2142.85	2142.85	0	0	0	0	0	0	0	0	0	0	0	0	0	0	0	0	6.23601	5.52354	5.98287	5.8928	0	0	0	0	0	0	0	0	0	0	0	0	0	0	0	0	5.9088	0	0	0	0	0.29509
52	2154.82	(HexNAc)4 (3-8NeuAc)1 + (Man)3(GlcNAc)2		2154.87	0	0	2154.93	0	0	0	0	0	0	2154.97	0	0	0	0	0	0	0	0	0	18.8883	0	0	14.937	0	0	0	0	0	0	37.0122	0	0	0	0	0	0	0	0	0	8.45632	0	9.25304	0	0	9.89687
53	2158.8	(Hex)1 (HexNAc)4 (Fuc)1 + (Man)3(GlcNAc)2	[36](HexNAc)4 (Fuc)1 + (Man)3(GlcNAc)2_x000D_ [34](Hex)1 (HexNAc)3 (Fuc)1 + (Man)3(GlcNAc)2_x000D_ [88](Hex)1 (HexNAc)5 (Fuc)1 + (Man)3(GlcNAc)2_x000D_ [78](Hex)2 (HexNAc)4 (Fuc)1 + (Man)3(GlcNAc)2_x000D_ [103](Hex)1 (HexNAc)4 (Fuc)1 (6NeuAc)1 + (Man)3(GlcNAc)2	0	0	0	2158.83	0	0	0	0	0	0	0	0	0	0	0	0	0	0	0	0	0	0	0	0.945765	0	0	0	0	0	0	0	0	0	0	0	0	0	0	0	0	0.236441	0	0	0	0	0.472882
54	2165.79	(Hex)3 (HexNAc)1 (Fuc)3 + (Man)3(GlcNAc)2	[80](Hex)4 (HexNAc)1 (Fuc)3 + (Man)3(GlcNAc)2	0	0	0	0	0	0	2165.9	0	0	0	0	0	2166.09	0	0	0	2166	0	0	0	0	0	0	0	0	0	2.83568	0	0	0	0	0	2.56238	0	0	0	6.00525	0	0	0	0	0.70892	0	0.640595	1.50131	0
55	2172.74	(Hex)7 + (Man)3(GlcNAc)2	[37](Hex)6 + (Man)3(GlcNAc)2	0	0	2172.8	2172.81	2172.79	2172.8	2172.81	2172.82	2172.84	2172.85	2172.88	0	2172.86	2172.85	2172.87	2172.87	2172.87	2172.88	2172.88	2172.89	0	0	0.79493	0.890934	1.81056	2.32183	1.84801	2.02063	1.58111	1.96549	1.67551	0	1.26137	3.87087	2.82048	2.66984	2.7065	2.74768	2.69042	3.00233	0.421466	2.00026	1.30553	2.65564	2.78673	0.488243
56	2172.82	(Hex)1 (HexNAc)3 (Fuc)1 (GlcA)1 + (Man)3(GlcNAc)2	[34](Hex)1 (HexNAc)3 (Fuc)1 + (Man)3(GlcNAc)2_x000D_ [39](Hex)1 (HexNAc)3 (GlcA)1 + (Man)3(GlcNAc)2_x000D_ [38](HexNAc)3 (Fuc)1 (GlcA)1 + (Man)3(GlcNAc)2_x000D_ [77](Hex)1 (HexNAc)3 (Fuc)2 (GlcA)1 + (Man)3(GlcNAc)2_x000D_ [106](Hex)1 (HexNAc)3 (Fuc)1 (6NeuAc)1 (GlcA)1 + (Man)3(GlcNAc)2	0	0	2172.8	2172.81	2172.79	2172.8	2172.81	2172.82	2172.84	2172.85	2172.88	0	2172.86	2172.85	2172.87	2172.87	2172.87	2172.88	2172.88	2172.89	0	0	0.79493	0.890934	1.81056	2.32183	1.84801	2.02063	1.58111	1.96549	1.67551	0	1.26137	3.87087	2.82048	2.66984	2.7065	2.74768	2.69042	3.00233	0.421466	2.00026	1.30553	2.65564	2.78673	0.488243
57	2188.81	(Hex)2 (HexNAc)3 (GlcA)1 + (Man)3(GlcNAc)2	[35](Hex)2 (HexNAc)3 + (Man)3(GlcNAc)2_x000D_ [39](Hex)1 (HexNAc)3 (GlcA)1 + (Man)3(GlcNAc)2_x000D_ [105](Hex)2 (HexNAc)3 (3-8NeuAc)1 (GlcA)1 + (Man)3(GlcNAc)2	0	0	0	0	0	2188.93	0	0	0	0	0	0	0	0	0	0	0	0	0	0	0	0	0	0	0	2.3197	0	0	0	0	0	0	0	0	0	0	0	0	0	0	0	0.579924	0	0	0	0
58	2197.78	(Hex)5 (HexNAc)1 (Fuc)1 + (Man)3(GlcNAc)2	[41](Hex)5 (HexNAc)1 + (Man)3(GlcNAc)2_x000D_ [85](Hex)6 (HexNAc)1 (Fuc)1 + (Man)3(GlcNAc)2_x000D_ [82](Hex)5 (HexNAc)1 (Fuc)2 + (Man)3(GlcNAc)2_x000D_ [94](Hex)5 (HexNAc)1 (Fuc)1 (GlcA)1 + (Man)3(GlcNAc)2	2197.82	2197.82	2197.85	2197.86	2197.84	2197.87	2197.88	2197.88	0	0	2197.93	0	0	2197.9	2197.92	2197.93	2197.93	0	2197.93	0	0.879194	0.682847	0.76764	0.853883	0.779811	0.976688	0.80137	0.943126	0	0	0.563074	0	0	0.801216	0.949706	0.863136	1.29934	0	0.734033	0	0.795891	0.875248	0.140769	0.653515	0.508343	0.089218
59	2205.83	(Hex)3 (HexNAc)1 (Fuc)1 (6NeuAc)1 + (Man)3(GlcNAc)2	[43](Hex)3 (HexNAc)1 (6NeuAc)1 + (Man)3(GlcNAc)2	0	0	0	0	0	0	0	0	0	0	0	0	0	0	0	0	2206.04	0	0	0	0	0	0	0	0	0	0	0	0	0	0	0	0	0	0	0	7.74525	0	0	0	0	0	0	0	1.93631	0
60	2218.82	(Hex)2 (HexNAc)2 (Fuc)1 (3-8NeuAc)1 + (Man)3(GlcNAc)2	[31](Hex)2 (HexNAc)2 (Fuc)1 + (Man)3(GlcNAc)2_x000D_ [44](Hex)2 (HexNAc)2 (3-8NeuAc)1 + (Man)3(GlcNAc)2_x000D_ [115](Hex)2 (HexNAc)2 (Fuc)1 (3-8NeuAc)1 (6NeuAc)1 + (Man)3(GlcNAc)2_x000D_ [111](Hex)2 (HexNAc)2 (Fuc)1 (3-8NeuAc)2 + (Man)3(GlcNAc)2	2218.82	2218.84	2218.85	2218.86	2218.85	2218.88	2218.89	2218.89	2218.9	2218.91	2218.94	2218.94	2218.92	2218.92	2218.93	2218.94	2218.94	2218.94	2218.93	2218.95	5.61752	5.16302	5.16692	5.23048	9.12802	8.98536	8.58554	8.31605	9.74072	9.84019	9.43377	9.40459	15.4852	15.0652	13.9075	13.3525	17.5873	17.0459	16.9275	16.1641	5.29448	8.75374	9.60482	14.4526	16.9312	0.217567
61	2229.84	(Hex)1 (HexNAc)4 (GlcA)1 + (Man)3(GlcNAc)2	[39](Hex)1 (HexNAc)3 (GlcA)1 + (Man)3(GlcNAc)2_x000D_ [95](Hex)1 (HexNAc)5 (GlcA)1 + (Man)3(GlcNAc)2	2229.89	2229.9	2229.92	2229.93	2229.93	2229.96	2229.97	2229.97	2229.97	2229.98	2230.01	2230.01	2229.99	2229.98	2230	2230	2230	2230.01	2230	2230.01	500	500	500	500	500	500	500	500	500	500	500	500	500	500	500	500	500	500	500	500	500	500	500	500	500	0
62	2238.8	(Hex)4 (HexNAc)2 (Fuc)1 + (Man)3(GlcNAc)2	[91](Hex)4 (HexNAc)2 (Fuc)2 + (Man)3(GlcNAc)2	0	0	2238.88	0	0	0	2238.91	0	0	0	0	0	0	0	0	0	0	0	0	0	0	0	0.627289	0	0	0	0.542788	0	0	0	0	0	0	0	0	0	0	0	0	0	0.156822	0.135697	0	0	0	0.313644
63	2246.86	(Hex)2 (HexNAc)2 (Fuc)1 (6NeuAc)1 + (Man)3(GlcNAc)2	[31](Hex)2 (HexNAc)2 (Fuc)1 + (Man)3(GlcNAc)2_x000D_ [47](Hex)2 (HexNAc)2 (6NeuAc)1 + (Man)3(GlcNAc)2_x000D_ [45](Hex)1 (HexNAc)2 (Fuc)1 (6NeuAc)1 + (Man)3(GlcNAc)2_x000D_ [98](Hex)2 (HexNAc)3 (Fuc)1 (6NeuAc)1 + (Man)3(GlcNAc)2_x000D_ [118](Hex)2 (HexNAc)2 (Fuc)1 (6NeuAc)2 + (Man)3(GlcNAc)2_x000D_ [115](Hex)2 (HexNAc)2 (Fuc)1 (3-8NeuAc)1 (6NeuAc)1 + (Man)3(GlcNAc)2	0	0	0	0	2246.91	2246.93	2246.94	2246.94	2246.95	2246.95	2246.98	2246.99	2246.97	2246.96	2246.98	2246.98	2246.98	2246.99	2246.98	2247	0	0	0	0	92.8092	93.128	94.5453	92.1379	92.191	91.5374	90.0712	89.8341	138.887	137.733	133.716	132.765	161.792	154.64	155.089	154.58	0	93.1551	90.9084	135.775	156.525	0
64	2247.84	(Hex)1 (HexNAc)3 (Fuc)3 + (Man)3(GlcNAc)2		0	2247.88	2247.9	2247.9	0	0	0	0	0	0	0	0	0	0	0	0	0	0	0	0	0	25.5681	25.9138	25.6521	0	0	0	0	0	0	0	0	0	0	0	0	0	0	0	0	19.2835	0	0	0	0	12.8565
65	2254.8	(Hex)5 (HexNAc)2 + (Man)3(GlcNAc)2	[41](Hex)5 (HexNAc)1 + (Man)3(GlcNAc)2	0	0	0	0	0	0	0	0	0	0	0	0	0	0	0	0	0	2255	0	0	0	0	0	0	0	0	0	0	0	0	0	0	0	0	0	0	0	1.31606	0	0	0	0	0	0	0.329015	0
66	2262.85	(Hex)3 (HexNAc)2 (6NeuAc)1 + (Man)3(GlcNAc)2	[32](Hex)3 (HexNAc)2 + (Man)3(GlcNAc)2_x000D_ [47](Hex)2 (HexNAc)2 (6NeuAc)1 + (Man)3(GlcNAc)2_x000D_ [43](Hex)3 (HexNAc)1 (6NeuAc)1 + (Man)3(GlcNAc)2_x000D_ [99](Hex)3 (HexNAc)3 (6NeuAc)1 + (Man)3(GlcNAc)2_x000D_ [120](Hex)3 (HexNAc)2 (6NeuAc)2 + (Man)3(GlcNAc)2_x000D_ [116](Hex)3 (HexNAc)2 (3-8NeuAc)1 (6NeuAc)1 + (Man)3(GlcNAc)2	2262.84	2262.84	2262.87	2262.88	2262.88	2262.91	2262.92	2262.92	2262.93	2262.93	2262.97	2262.97	2262.94	2262.94	2262.96	2262.96	2262.96	2262.96	2262.96	2262.97	7.09793	6.52153	6.01334	5.97659	9.8166	9.88161	9.66922	9.14375	7.4395	7.19142	7.1558	6.76599	16.2447	15.7902	15.0834	14.3911	18.7674	17.6587	17.3608	16.2918	6.40235	9.62779	7.13818	15.3774	17.5197	0.526195
67	2270.87	(HexNAc)5 (GlcA)1 + (Man)3(GlcNAc)2	[42](HexNAc)5 + (Man)3(GlcNAc)2_x000D_ [95](Hex)1 (HexNAc)5 (GlcA)1 + (Man)3(GlcNAc)2	0	0	0	0	0	0	0	0	0	0	0	0	0	2270.95	0	0	0	0	2271	0	0	0	0	0	0	0	0	0	0	0	0	0	0	1.7389	0	0	0	0	1.21747	0	0	0	0	0.434726	0.304367	0
68	2270.9	(Hex)1 (HexNAc)2 (6NeuAc)2 + (Man)3(GlcNAc)2	[33](Hex)1 (HexNAc)2 (6NeuAc)1 + (Man)3(GlcNAc)2_x000D_ [96](Hex)2 (HexNAc)2 (6NeuAc)2 + (Man)3(GlcNAc)2	0	0	0	0	0	0	0	0	0	0	0	0	0	2270.95	0	0	0	0	2271	0	0	0	0	0	0	0	0	0	0	0	0	0	0	1.7389	0	0	0	0	1.21747	0	0	0	0	0.434726	0.304367	0
69	2271.89	(HexNAc)3 (Fuc)2 (6NeuAc)1 + (Man)3(GlcNAc)2	[100](HexNAc)4 (Fuc)2 (6NeuAc)1 + (Man)3(GlcNAc)2	2271.89	2271.91	2271.93	2271.93	2271.96	2271.95	2271.96	2271.96	2271.99	2271.98	2272.07	2272.01	2272.01	0	2272.03	2272.03	2272.01	2272.03	0	2272.03	5.20948	5.25641	4.83685	4.6454	5.34614	5.41177	5.05553	5.03067	5.48951	4.57592	5.99208	4.45799	6.93883	0	6.1477	5.93308	9.691	6.85433	0	5.43186	4.98703	5.21103	5.12888	4.7549	5.4943	0.295136
70	2273.87	(Hex)1 (HexNAc)2 (Fuc)1 (3-8NeuAc)1 (GlcA)1 + (Man)3(GlcNAc)2		2273.91	0	2273.97	2273.95	0	0	0	2274.86	0	0	0	0	0	0	0	0	0	0	0	0	0.325103	0	0.294385	0.388904	0	0	0	0.357101	0	0	0	0	0	0	0	0	0	0	0	0	0.252098	0.089275	0	0	0	0.172615
71	2287.88	(Hex)1 (HexNAc)3 (Fuc)1 (6NeuAc)1 + (Man)3(GlcNAc)2	[34](Hex)1 (HexNAc)3 (Fuc)1 + (Man)3(GlcNAc)2_x000D_ [50](Hex)1 (HexNAc)3 (6NeuAc)1 + (Man)3(GlcNAc)2_x000D_ [45](Hex)1 (HexNAc)2 (Fuc)1 (6NeuAc)1 + (Man)3(GlcNAc)2_x000D_ [103](Hex)1 (HexNAc)4 (Fuc)1 (6NeuAc)1 + (Man)3(GlcNAc)2_x000D_ [98](Hex)2 (HexNAc)3 (Fuc)1 (6NeuAc)1 + (Man)3(GlcNAc)2_x000D_ [106](Hex)1 (HexNAc)3 (Fuc)1 (6NeuAc)1 (GlcA)1 + (Man)3(GlcNAc)2	2288.88	2287.91	2287.92	0	2287.92	2287.94	2287.95	2287.96	2287.96	2287.97	2287.99	2288	2287.97	2287.97	2287.99	2287.99	2287.99	2288	2287.99	2288.01	0.618949	0.574548	0.529571	0	6.36168	6.33723	4.87522	5.31882	6.92243	7.05168	6.42768	6.72039	7.80173	8.09364	7.33851	7.26803	9.98813	8.3336	8.63844	7.62178	0.430767	5.72324	6.78055	7.62548	8.64549	0.289487
72	2288.87	(HexNAc)4 (Fuc)3 + (Man)3(GlcNAc)2	[51](HexNAc)4 (Fuc)2 + (Man)3(GlcNAc)2_x000D_ [104](HexNAc)5 (Fuc)3 + (Man)3(GlcNAc)2_x000D_ [108](HexNAc)4 (Fuc)3 (GlcA)1 + (Man)3(GlcNAc)2	2288.88	2288.9	2288.91	0	0	0	0	0	0	0	0	0	0	0	0	0	0	0	0	0	3.0225	3.15301	2.99319	0	0	0	0	0	0	0	0	0	0	0	0	0	0	0	0	0	2.29218	0	0	0	0	1.5297
73	2289.86	(Hex)2 (HexNAc)2 (3-8NeuAc)1 (GlcA)1 + (Man)3(GlcNAc)2	[44](Hex)2 (HexNAc)2 (3-8NeuAc)1 + (Man)3(GlcNAc)2_x000D_ [105](Hex)2 (HexNAc)3 (3-8NeuAc)1 (GlcA)1 + (Man)3(GlcNAc)2	0	0	0	2289.92	0	0	0	0	0	0	0	0	0	0	0	0	0	0	0	0	0	0	0	2.59772	0	0	0	0	0	0	0	0	0	0	0	0	0	0	0	0	0.64943	0	0	0	0	1.29886
74	2295.82	(Hex)4 (HexNAc)3 + (Man)3(GlcNAc)2	[49](Hex)3 (HexNAc)3 + (Man)3(GlcNAc)2	0	0	0	0	0	2295.94	0	0	0	0	0	0	0	0	0	0	0	0	0	0	0	0	0	0	0	1.7288	0	0	0	0	0	0	0	0	0	0	0	0	0	0	0	0.432201	0	0	0	0
75	2303.88	(Hex)2 (HexNAc)3 (6NeuAc)1 + (Man)3(GlcNAc)2	[35](Hex)2 (HexNAc)3 + (Man)3(GlcNAc)2_x000D_ [50](Hex)1 (HexNAc)3 (6NeuAc)1 + (Man)3(GlcNAc)2_x000D_ [47](Hex)2 (HexNAc)2 (6NeuAc)1 + (Man)3(GlcNAc)2_x000D_ [99](Hex)3 (HexNAc)3 (6NeuAc)1 + (Man)3(GlcNAc)2_x000D_ [98](Hex)2 (HexNAc)3 (Fuc)1 (6NeuAc)1 + (Man)3(GlcNAc)2_x000D_ [123](Hex)2 (HexNAc)3 (6NeuAc)2 + (Man)3(GlcNAc)2_x000D_ [121](Hex)2 (HexNAc)3 (3-8NeuAc)1 (6NeuAc)1 + (Man)3(GlcNAc)2	2303.88	2303.89	2303.91	2303.91	2303.91	2303.94	2303.95	2303.95	2303.96	2303.97	2304	2304	2303.98	2303.98	2303.99	2303.99	2303.99	2304	2303.99	2304.01	8.96068	8.87957	8.30421	8.36906	17.9371	18.089	16.6367	17.4276	23.6422	23.7846	23.0588	22.5843	32.3496	32.1653	29.7836	29.4826	38.0568	36.8408	35.2789	33.7895	8.62838	17.5226	23.2675	30.9453	35.9915	0.339536
76	2317.89	(Hex)2 (HexNAc)2 (6NeuAc)1 (GlcA)1 + (Man)3(GlcNAc)2	[47](Hex)2 (HexNAc)2 (6NeuAc)1 + (Man)3(GlcNAc)2	0	0	2317.91	2317.91	2317.91	2317.94	2317.95	2317.95	2317.96	2317.97	2318	2318	2317.97	2317.98	2317.99	2317.99	2317.97	2318	2317.99	2318.01	0	0	1.23377	1.25721	1.51944	1.88793	1.65969	1.79381	2.0732	1.99947	2.20965	1.97848	2.56131	2.2197	2.48768	2.32623	2.62203	2.579	2.68693	2.34165	0.622747	1.71522	2.0652	2.39873	2.5574	0.71915
77	2318.88	(Hex)1 (HexNAc)3 (Fuc)2 (GlcA)1 + (Man)3(GlcNAc)2	[56](Hex)1 (HexNAc)3 (Fuc)1 (GlcA)1 + (Man)3(GlcNAc)2	2318.86	2318.9	0	0	0	0	0	0	0	0	0	0	0	0	0	0	0	0	0	0	1.14747	1.12563	0	0	0	0	0	0	0	0	0	0	0	0	0	0	0	0	0	0	0.568274	0	0	0	0	0.656246
78	2320.86	(Hex)2 (HexNAc)4 (Fuc)1 + (Man)3(GlcNAc)2	[53](Hex)1 (HexNAc)4 (Fuc)1 + (Man)3(GlcNAc)2_x000D_ [48](Hex)2 (HexNAc)3 (Fuc)1 + (Man)3(GlcNAc)2_x000D_ [112](Hex)2 (HexNAc)4 (Fuc)1 (GlcA)1 + (Man)3(GlcNAc)2	0	0	2320.88	2320.88	0	2320.91	2320.93	2320.92	0	0	0	0	0	0	0	0	0	0	0	0	0	0	0.554119	0.575285	0	0.964253	0.76386	0.94123	0	0	0	0	0	0	0	0	0	0	0	0	0.282351	0.667336	0	0	0	0.326145
79	2323.86	(Hex)3 (HexNAc)1 (Fuc)2 (3-8NeuAc)1 + (Man)3(GlcNAc)2	[101](Hex)4 (HexNAc)1 (Fuc)2 (3-8NeuAc)1 + (Man)3(GlcNAc)2	2323.84	0	0	0	0	0	0	0	0	0	0	0	0	0	0	0	2323.96	0	0	0	0.986648	0	0	0	0	0	0	0	0	0	0	0	0	0	0	0	1.95088	0	0	0	0.246662	0	0	0	0.487721	0.493324
80	2327.84	(Hex)4 (HexNAc)1 (Fuc)3 + (Man)3(GlcNAc)2	[54](Hex)3 (HexNAc)1 (Fuc)3 + (Man)3(GlcNAc)2_x000D_ [102](Hex)5 (HexNAc)1 (Fuc)3 + (Man)3(GlcNAc)2	2327.9	2327.92	2327.94	2327.94	2327.94	2327.97	2327.98	2327.98	2327.98	2327.99	2328.02	2328.02	2328	2328	2328.02	2328.02	2328.02	2328.02	2328.02	2328.03	20.4775	20.0633	19.7563	19.5894	34.0274	34.9603	33.4	32.9931	39.9005	39.7977	38.2254	38.5796	66.8078	64.7275	61.8206	62.8138	76.0273	75.3884	74.9729	72.53	19.9716	33.8452	39.1258	64.0424	74.7296	0.390198
81	2339.85	(Hex)4 (HexNAc)1 (Fuc)1 (3-8NeuAc)1 + (Man)3(GlcNAc)2	[101](Hex)4 (HexNAc)1 (Fuc)2 (3-8NeuAc)1 + (Man)3(GlcNAc)2	0	0	0	0	0	0	0	0	0	2340.16	2340.15	2340.19	2340.17	2340.22	2340.18	2340.18	2340.21	2340.16	2340.16	2340.17	0	0	0	0	0	0	0	0	0	10.5786	10.3266	9.86361	14.9088	15.2175	14.0097	13.5905	19.264	17.0545	16.3114	15.2916	0	0	7.69219	14.4316	16.9804	0
82	2343.83	(Hex)5 (HexNAc)1 (Fuc)2 + (Man)3(GlcNAc)2	[58](Hex)5 (HexNAc)1 (Fuc)1 + (Man)3(GlcNAc)2_x000D_ [114](Hex)5 (HexNAc)2 (Fuc)2 + (Man)3(GlcNAc)2_x000D_ [107](Hex)6 (HexNAc)1 (Fuc)2 + (Man)3(GlcNAc)2_x000D_ [102](Hex)5 (HexNAc)1 (Fuc)3 + (Man)3(GlcNAc)2	2343.88	2343.9	2343.92	2343.93	2343.92	2343.95	2343.96	2343.96	0	0	0	0	2343.98	2343.98	2343.99	2344	2344	2344	2344	2344.01	5.58419	4.51133	4.30401	4.95277	6.09688	6.29242	5.87928	6.03014	0	0	0	0	8.96315	8.58691	8.18797	7.8465	10.1922	9.53233	9.29008	9.65836	4.83808	6.07468	0	8.39613	9.66824	0.566223
83	2344.9	(Hex)1 (HexNAc)4 (6NeuAc)1 + (Man)3(GlcNAc)2	[50](Hex)1 (HexNAc)3 (6NeuAc)1 + (Man)3(GlcNAc)2_x000D_ [103](Hex)1 (HexNAc)4 (Fuc)1 (6NeuAc)1 + (Man)3(GlcNAc)2_x000D_ [126](Hex)1 (HexNAc)4 (6NeuAc)2 + (Man)3(GlcNAc)2	0	0	0	0	0	0	0	0	2344.97	2344.97	0	2345.01	0	0	0	0	0	0	0	0	0	0	0	0	0	0	0	0	5.29157	5.07789	0	4.75126	0	0	0	0	0	0	0	0	0	0	3.78018	0	0	0
84	2345.89	(HexNAc)5 (Fuc)2 + (Man)3(GlcNAc)2	[51](HexNAc)4 (Fuc)2 + (Man)3(GlcNAc)2_x000D_ [109](Hex)1 (HexNAc)5 (Fuc)2 + (Man)3(GlcNAc)2_x000D_ [104](HexNAc)5 (Fuc)3 + (Man)3(GlcNAc)2_x000D_ [127](HexNAc)5 (Fuc)2 (6NeuAc)1 + (Man)3(GlcNAc)2	0	2345.91	2345.93	0	2345.93	2345.96	2345.97	2345.97	0	0	2346.01	0	2346	2345.99	2346.01	2346.01	2346.02	2346.02	2346.01	2346.02	0	1.91828	1.91611	0	2.97737	3.16215	3.11776	3.02389	0	0	6.02792	0	5.35122	4.40854	5.13097	5.0495	4.7225	5.62973	5.64183	5.27341	0.9586	3.07029	1.50698	4.98506	5.31687	1.1069
85	2359.83	(Hex)6 (HexNAc)1 (Fuc)1 + (Man)3(GlcNAc)2	[58](Hex)5 (HexNAc)1 (Fuc)1 + (Man)3(GlcNAc)2_x000D_ [107](Hex)6 (HexNAc)1 (Fuc)2 + (Man)3(GlcNAc)2_x000D_ [124](Hex)6 (HexNAc)1 (Fuc)1 (3-8NeuAc)1 + (Man)3(GlcNAc)2	0	0	2359.9	2359.9	0	0	2359.95	0	0	0	0	0	0	0	0	0	0	0	0	0	0	0	0.882155	0.514967	0	0	0.220776	0	0	0	0	0	0	0	0	0	0	0	0	0	0.34928	0.055194	0	0	0	0.430271
86	2359.9	(HexNAc)4 (Fuc)2 (GlcA)1 + (Man)3(GlcNAc)2	[51](HexNAc)4 (Fuc)2 + (Man)3(GlcNAc)2_x000D_ [108](HexNAc)4 (Fuc)3 (GlcA)1 + (Man)3(GlcNAc)2	0	0	2359.9	2359.9	0	0	2359.95	0	0	0	0	0	0	0	0	0	0	0	0	0	0	0	0.882155	0.514967	0	0	0.220776	0	0	0	0	0	0	0	0	0	0	0	0	0	0.34928	0.055194	0	0	0	0.430271
87	2360.9	(Hex)1 (HexNAc)2 (Fuc)1 (3-8NeuAc)2 + (Man)3(GlcNAc)2	[111](Hex)2 (HexNAc)2 (Fuc)1 (3-8NeuAc)2 + (Man)3(GlcNAc)2	2360.88	0	0	0	2360.92	2360.95	0	2360.94	0	0	0	0	0	0	0	0	0	0	0	0	1.2272	0	0	0	1.52565	1.55145	0	1.20335	0	0	0	0	0	0	0	0	0	0	0	0	0.3068	1.07011	0	0	0	0.613599
88	2361.88	(Hex)1 (HexNAc)5 (Fuc)1 + (Man)3(GlcNAc)2	[53](Hex)1 (HexNAc)4 (Fuc)1 + (Man)3(GlcNAc)2_x000D_ [109](Hex)1 (HexNAc)5 (Fuc)2 + (Man)3(GlcNAc)2_x000D_ [117](Hex)1 (HexNAc)5 (Fuc)1 (GlcA)1 + (Man)3(GlcNAc)2_x000D_ [130](Hex)1 (HexNAc)5 (Fuc)1 (6NeuAc)1 + (Man)3(GlcNAc)2_x000D_ [125](Hex)1 (HexNAc)5 (Fuc)1 (3-8NeuAc)1 + (Man)3(GlcNAc)2	0	0	0	2361.86	0	0	2361.97	0	0	0	0	2361.99	2362.02	2362.05	2361.98	2362.01	2361.98	2362	2361.98	2361.99	0	0	0	0.773356	0	0	1.41482	0	0	0	0	0.871691	2.54276	2.75147	1.91542	2.19017	1.75477	2.40619	1.96171	1.89712	0.193339	0.353704	0.217923	2.34995	2.00495	0.386678
89	2376.89	(Hex)2 (HexNAc)2 (3-8NeuAc)2 + (Man)3(GlcNAc)2	[44](Hex)2 (HexNAc)2 (3-8NeuAc)1 + (Man)3(GlcNAc)2_x000D_ [113](Hex)3 (HexNAc)2 (3-8NeuAc)2 + (Man)3(GlcNAc)2_x000D_ [111](Hex)2 (HexNAc)2 (Fuc)1 (3-8NeuAc)2 + (Man)3(GlcNAc)2	2376.89	2376.91	2376.92	2376.93	2376.93	2376.95	2376.96	2376.96	2376.97	2376.98	2377.01	2377.01	2376.99	2376.99	2377	2377.01	2377.01	2377.01	2377.01	2377.02	2.25822	2.09168	2.0621	2.00848	4.39567	4.22247	4.03692	4.11275	5.27572	5.04169	4.99175	4.88349	7.27041	7.19292	6.72918	6.52083	8.97675	8.45265	8.09592	7.44167	2.10512	4.19195	5.04817	6.92834	8.24175	0.107717
90	2383.88	(Hex)5 (HexNAc)1 (6NeuAc)1 + (Man)3(GlcNAc)2	[41](Hex)5 (HexNAc)1 + (Man)3(GlcNAc)2	0	2383.94	2383.95	2383.97	2383.99	2383.98	2384.01	2383.99	2384.02	2384.02	2384.06	2384.06	2384.03	2384.03	2384.04	2384.05	2384.05	2384.05	2384.04	2384.03	0	0.875706	1.44649	1.49434	2.61615	2.32851	2.27589	2.11327	2.59332	2.37032	2.5059	2.36876	3.2319	3.73239	2.90452	2.97556	4.32178	3.62315	3.49607	2.89566	0.954134	2.33346	2.45958	3.21109	3.58417	0.695404
91	2384.86	(Hex)4 (HexNAc)2 (Fuc)2 + (Man)3(GlcNAc)2	[62](Hex)4 (HexNAc)2 (Fuc)1 + (Man)3(GlcNAc)2_x000D_ [114](Hex)5 (HexNAc)2 (Fuc)2 + (Man)3(GlcNAc)2	2384.94	0	0	0	0	0	0	0	0	0	0	0	0	0	0	0	0	0	0	0	1.37597	0	0	0	0	0	0	0	0	0	0	0	0	0	0	0	0	0	0	0	0.343993	0	0	0	0	0.687987
92	2385.93	(HexNAc)5 (6NeuAc)1 + (Man)3(GlcNAc)2	[42](HexNAc)5 + (Man)3(GlcNAc)2	0	0	0	0	0	0	0	2385.98	0	0	0	0	0	0	0	0	0	0	0	0	0	0	0	0	0	0	0	0.451413	0	0	0	0	0	0	0	0	0	0	0	0	0	0.112853	0	0	0	0
93	2404.92	(Hex)2 (HexNAc)2 (3-8NeuAc)1 (6NeuAc)1 + (Man)3(GlcNAc)2	[47](Hex)2 (HexNAc)2 (6NeuAc)1 + (Man)3(GlcNAc)2_x000D_ [44](Hex)2 (HexNAc)2 (3-8NeuAc)1 + (Man)3(GlcNAc)2_x000D_ [121](Hex)2 (HexNAc)3 (3-8NeuAc)1 (6NeuAc)1 + (Man)3(GlcNAc)2_x000D_ [116](Hex)3 (HexNAc)2 (3-8NeuAc)1 (6NeuAc)1 + (Man)3(GlcNAc)2_x000D_ [115](Hex)2 (HexNAc)2 (Fuc)1 (3-8NeuAc)1 (6NeuAc)1 + (Man)3(GlcNAc)2	2404.93	2404.95	2404.96	2404.97	2404.96	2404.99	2405	2405	2405.01	2405.02	2405.05	2405.05	2405.03	2405.03	2405.04	2405.05	2405.05	2405.05	2405.05	2405.06	50.2608	50.195	49.0075	48.9746	114.382	110.333	109.947	112.397	150.549	151.65	146.987	149.005	214.654	213.524	212.007	210.832	265.234	266.063	263.944	260.889	49.6095	111.765	149.547	212.754	264.033	0.714744
94	2414.87	(Hex)5 (HexNAc)1 (Fuc)1 (GlcA)1 + (Man)3(GlcNAc)2	[58](Hex)5 (HexNAc)1 (Fuc)1 + (Man)3(GlcNAc)2	2414.93	2414.95	2414.98	2414.98	2414.96	2414.98	2414.99	2415	2415.01	2415.02	2415.05	2415.05	2415.04	2415.02	2415.04	2415.04	2415.05	2415.05	2415.05	2415.06	2.08445	2.14494	1.97595	1.83499	4.24353	4.15974	3.5757	3.89539	5.05831	5.32273	4.80692	4.89806	6.80738	6.68732	6.33124	6.02723	7.82645	7.73064	7.47049	6.92471	2.01008	3.96859	5.02151	6.46329	7.48807	0.136059
95	2432.92	(Hex)1 (HexNAc)5 (GlcA)1 + (Man)3(GlcNAc)2	[67](HexNAc)5 (GlcA)1 + (Man)3(GlcNAc)2_x000D_ [61](Hex)1 (HexNAc)4 (GlcA)1 + (Man)3(GlcNAc)2_x000D_ [119](Hex)2 (HexNAc)5 (GlcA)1 + (Man)3(GlcNAc)2_x000D_ [117](Hex)1 (HexNAc)5 (Fuc)1 (GlcA)1 + (Man)3(GlcNAc)2	2432.97	2432.99	2433	2433.01	2433.05	2433.08	2433.09	2433.09	2433.1	2433.11	2433.14	2433.14	2433.15	2433.14	2433.15	2433.15	2433.16	2433.18	2433.16	2433.18	382.416	384.402	379.767	380.329	807.713	800.077	792.132	802.543	1084.28	1090.35	1079.43	1091.68	1411.99	1445.63	1434.5	1466.76	1780.39	1730.21	1764.96	1778.62	381.729	800.616	1086.43	1439.72	1763.54	2.11544
96	2432.96	(Hex)2 (HexNAc)2 (6NeuAc)2 + (Man)3(GlcNAc)2	[47](Hex)2 (HexNAc)2 (6NeuAc)1 + (Man)3(GlcNAc)2_x000D_ [68](Hex)1 (HexNAc)2 (6NeuAc)2 + (Man)3(GlcNAc)2_x000D_ [123](Hex)2 (HexNAc)3 (6NeuAc)2 + (Man)3(GlcNAc)2_x000D_ [120](Hex)3 (HexNAc)2 (6NeuAc)2 + (Man)3(GlcNAc)2_x000D_ [118](Hex)2 (HexNAc)2 (Fuc)1 (6NeuAc)2 + (Man)3(GlcNAc)2	2432.97	2432.99	2433	2433.01	2433.05	2433.08	2433.09	2433.09	2433.1	2433.11	2433.14	2433.14	2433.15	2433.14	2433.15	2433.15	2433.16	2433.18	2433.16	2433.18	382.416	384.402	379.767	380.329	807.713	800.077	792.132	802.543	1084.28	1090.35	1079.43	1091.68	1411.99	1445.63	1434.5	1466.76	1780.39	1730.21	1764.96	1778.62	381.729	800.616	1086.43	1439.72	1763.54	2.11544
97	2439.9	(Hex)3 (HexNAc)2 (Fuc)2 (GlcA)1 + (Man)3(GlcNAc)2		0	0	0	0	2440.09	2440.11	2440.11	2440.12	2440.14	2440.16	2440.22	2440.23	2440.23	2440.23	2440.24	2440.25	2440.25	2440.24	2440.24	2440.26	0	0	0	0	12.6025	12.2699	11.3895	11.6559	13.7667	15.3865	13.5236	14.5985	18.9753	20.5037	18.9202	19.5253	24.1046	24.5821	24.7087	22.9687	0	11.9795	14.3188	19.4811	24.091	0
98	2449.93	(Hex)2 (HexNAc)3 (Fuc)1 (6NeuAc)1 + (Man)3(GlcNAc)2	[48](Hex)2 (HexNAc)3 (Fuc)1 + (Man)3(GlcNAc)2_x000D_ [75](Hex)2 (HexNAc)3 (6NeuAc)1 + (Man)3(GlcNAc)2_x000D_ [71](Hex)1 (HexNAc)3 (Fuc)1 (6NeuAc)1 + (Man)3(GlcNAc)2_x000D_ [63](Hex)2 (HexNAc)2 (Fuc)1 (6NeuAc)1 + (Man)3(GlcNAc)2_x000D_ [122](Hex)3 (HexNAc)3 (Fuc)1 (6NeuAc)1 + (Man)3(GlcNAc)2_x000D_ [135](Hex)2 (HexNAc)3 (Fuc)1 (6NeuAc)2 + (Man)3(GlcNAc)2_x000D_ [133](Hex)2 (HexNAc)3 (Fuc)1 (3-8Neu…	0	0	0	0	0	0	0	0	2450.05	2450.06	2450.09	2450.1	0	0	0	0	0	0	0	0	0	0	0	0	0	0	0	0	69.5587	70.0467	66.3885	67.0484	0	0	0	0	0	0	0	0	0	0	68.2606	0	0	0
99	2465.93	(Hex)3 (HexNAc)3 (6NeuAc)1 + (Man)3(GlcNAc)2	[49](Hex)3 (HexNAc)3 + (Man)3(GlcNAc)2_x000D_ [75](Hex)2 (HexNAc)3 (6NeuAc)1 + (Man)3(GlcNAc)2_x000D_ [66](Hex)3 (HexNAc)2 (6NeuAc)1 + (Man)3(GlcNAc)2_x000D_ [122](Hex)3 (HexNAc)3 (Fuc)1 (6NeuAc)1 + (Man)3(GlcNAc)2_x000D_ [137](Hex)3 (HexNAc)3 (6NeuAc)2 + (Man)3(GlcNAc)2_x000D_ [134](Hex)3 (HexNAc)3 (3-8NeuAc)1 (6NeuAc)1 + (Man)3(GlcNAc)2	2465.93	2465.95	2465.97	2465.95	2465.99	2466.02	2466.03	2466.03	2466.04	2466.05	2466.08	2466.09	2466.08	2466.07	2466.09	2466.09	2466.09	2466.11	2466.1	2466.11	7.48026	7.19763	6.71398	6.84484	16.3973	16.1038	15.7523	15.5914	17.1625	17.4855	16.6022	16.3193	28.7525	27.5898	27.6233	26.1215	32.5885	32.7755	31.5883	30.0777	7.05918	15.9612	16.8924	27.5218	31.7575	0.347169
100	2474.97	(HexNAc)4 (Fuc)2 (6NeuAc)1 + (Man)3(GlcNAc)2	[51](HexNAc)4 (Fuc)2 + (Man)3(GlcNAc)2_x000D_ [69](HexNAc)3 (Fuc)2 (6NeuAc)1 + (Man)3(GlcNAc)2_x000D_ [127](HexNAc)5 (Fuc)2 (6NeuAc)1 + (Man)3(GlcNAc)2	2474.97	2474.99	2475.01	2475.01	2475.04	2475.06	2475.07	2475.08	2475.08	2475.09	2475.12	2475.13	2475.12	2475.11	2475.13	2475.13	2475.14	2475.15	2475.14	2475.16	3.85844	3.94632	3.5536	3.30147	7.1945	6.62697	6.12992	6.21665	9.66658	8.62541	9.78242	8.26404	11.3425	12.2607	11.1609	10.9786	16.907	14.0364	13.5385	12.0558	3.66496	6.54201	9.08461	11.4357	14.1344	0.295027
101	2485.91	(Hex)4 (HexNAc)1 (Fuc)2 (3-8NeuAc)1 + (Man)3(GlcNAc)2	[81](Hex)4 (HexNAc)1 (Fuc)1 (3-8NeuAc)1 + (Man)3(GlcNAc)2_x000D_ [79](Hex)3 (HexNAc)1 (Fuc)2 (3-8NeuAc)1 + (Man)3(GlcNAc)2	0	0	0	0	2485.87	2485.84	2485.89	2485.9	2485.93	2485.96	2485.98	2485.97	0	0	0	2486.28	0	2485.96	2485.95	2485.96	0	0	0	0	3.44514	3.67677	3.29387	3.10035	4.79283	4.46923	4.84787	4.12805	0	0	0	6.1112	0	5.4001	4.92807	5.48774	0	3.37903	4.5595	1.5278	3.95398	0
102	2489.89	(Hex)5 (HexNAc)1 (Fuc)3 + (Man)3(GlcNAc)2	[82](Hex)5 (HexNAc)1 (Fuc)2 + (Man)3(GlcNAc)2_x000D_ [80](Hex)4 (HexNAc)1 (Fuc)3 + (Man)3(GlcNAc)2_x000D_ [129](Hex)5 (HexNAc)2 (Fuc)3 + (Man)3(GlcNAc)2	0	0	0	0	0	0	0	0	0	0	0	0	2490.1	0	0	2490.1	0	0	2490.13	0	0	0	0	0	0	0	0	0	0	0	0	0	5.19891	0	0	3.70392	0	0	1.07712	0	0	0	0	2.22571	0.26928	0
103	2490.96	(Hex)1 (HexNAc)4 (Fuc)1 (6NeuAc)1 + (Man)3(GlcNAc)2	[53](Hex)1 (HexNAc)4 (Fuc)1 + (Man)3(GlcNAc)2_x000D_ [83](Hex)1 (HexNAc)4 (6NeuAc)1 + (Man)3(GlcNAc)2_x000D_ [71](Hex)1 (HexNAc)3 (Fuc)1 (6NeuAc)1 + (Man)3(GlcNAc)2_x000D_ [130](Hex)1 (HexNAc)5 (Fuc)1 (6NeuAc)1 + (Man)3(GlcNAc)2	0	0	0	0	0	0	0	0	2491.06	0	0	0	0	0	2491.11	0	2491.1	0	0	0	0	0	0	0	0	0	0	0	0.737018	0	0	0	0	0	3.76573	0	6.29922	0	0	0	0	0	0.184254	0.941432	1.5748	0
104	2491.95	(HexNAc)5 (Fuc)3 + (Man)3(GlcNAc)2	[84](HexNAc)5 (Fuc)2 + (Man)3(GlcNAc)2_x000D_ [72](HexNAc)4 (Fuc)3 + (Man)3(GlcNAc)2_x000D_ [141](HexNAc)5 (Fuc)3 (6NeuAc)1 + (Man)3(GlcNAc)2	2491.93	2491.96	2491.97	2491.97	2491.99	2492.02	0	2492.61	0	2492.62	0	2492.65	0	2492.09	0	0	0	2492.67	2492.11	2492.12	1.13262	1.24091	1.28595	0.954987	3.02919	2.79886	0	2.48056	0	3.01333	0	2.42643	0	4.53237	0	0	0	5.49979	5.06563	6.34401	1.15362	2.07715	1.35994	1.13309	4.22736	0.147227
105	2492.94	(Hex)2 (HexNAc)3 (3-8NeuAc)1 (GlcA)1 + (Man)3(GlcNAc)2	[57](Hex)2 (HexNAc)3 (GlcA)1 + (Man)3(GlcNAc)2_x000D_ [73](Hex)2 (HexNAc)2 (3-8NeuAc)1 (GlcA)1 + (Man)3(GlcNAc)2	0	0	0	0	0	0	2493.04	0	2493.07	0	2493.13	0	2493.09	0	2493.12	2493.1	2493.64	0	0	0	0	0	0	0	0	0	1.74903	0	3.00642	0	3.22339	0	2.68441	0	1.17219	2.3349	3.49323	0	0	0	0	0.437258	1.55745	1.54788	0.873308	0
106	2504.98	(Hex)1 (HexNAc)3 (Fuc)1 (6NeuAc)1 (GlcA)1 + (Man)3(GlcNAc)2	[56](Hex)1 (HexNAc)3 (Fuc)1 (GlcA)1 + (Man)3(GlcNAc)2_x000D_ [71](Hex)1 (HexNAc)3 (Fuc)1 (6NeuAc)1 + (Man)3(GlcNAc)2	0	2504.92	0	0	2504.97	2504.99	0	2504.99	0	0	0	0	0	0	0	0	0	0	0	0	0	0.545002	0	0	0.674431	0.754912	0	0.639514	0	0	0	0	0	0	0	0	0	0	0	0	0.136251	0.517214	0	0	0	0.272501
107	2505.89	(Hex)6 (HexNAc)1 (Fuc)2 + (Man)3(GlcNAc)2	[85](Hex)6 (HexNAc)1 (Fuc)1 + (Man)3(GlcNAc)2_x000D_ [82](Hex)5 (HexNAc)1 (Fuc)2 + (Man)3(GlcNAc)2	0	0	2505.94	0	0	0	0	0	0	0	0	0	0	0	0	0	0	0	0	0	0	0	0.817574	0	0	0	0	0	0	0	0	0	0	0	0	0	0	0	0	0	0.204394	0	0	0	0	0.408787
108	2505.96	(HexNAc)4 (Fuc)3 (GlcA)1 + (Man)3(GlcNAc)2	[72](HexNAc)4 (Fuc)3 + (Man)3(GlcNAc)2_x000D_ [86](HexNAc)4 (Fuc)2 (GlcA)1 + (Man)3(GlcNAc)2	0	0	2505.94	0	0	0	0	0	0	0	0	0	0	0	0	0	0	0	0	0	0	0	0.817574	0	0	0	0	0	0	0	0	0	0	0	0	0	0	0	0	0	0.204394	0	0	0	0	0.408787
109	2507.94	(Hex)1 (HexNAc)5 (Fuc)2 + (Man)3(GlcNAc)2	[88](Hex)1 (HexNAc)5 (Fuc)1 + (Man)3(GlcNAc)2_x000D_ [84](HexNAc)5 (Fuc)2 + (Man)3(GlcNAc)2_x000D_ [138](Hex)1 (HexNAc)5 (Fuc)2 (3-8NeuAc)1 + (Man)3(GlcNAc)2	2507.89	2507.9	0	2507.94	2507.96	2507.98	2507.99	2507.99	2508.21	2508	2508.03	2508.31	2508.04	0	2508.05	2508.04	2508.07	2508.07	2508.07	2508.08	1.60024	1.54505	0	1.46541	3.30661	3.28624	2.89667	3.25357	4.95791	4.8776	4.06565	5.1208	4.41855	0	3.8247	4.2798	4.56318	5.81402	4.27287	4.47678	1.15267	3.18577	4.75549	3.13076	4.78171	0.77044
110	2517.9	(Hex)6 (HexNAc)1 (3-8NeuAc)1 + (Man)3(GlcNAc)2	[124](Hex)6 (HexNAc)1 (Fuc)1 (3-8NeuAc)1 + (Man)3(GlcNAc)2	0	0	0	0	0	0	0	2518.06	0	0	0	0	0	0	0	0	2518.15	2518.15	2518.14	2518.15	0	0	0	0	0	0	0	0.460335	0	0	0	0	0	0	0	0	2.30607	1.74776	1.71766	1.4315	0	0.115084	0	0	1.80075	0
111	2522.95	(Hex)2 (HexNAc)2 (Fuc)1 (3-8NeuAc)2 + (Man)3(GlcNAc)2	[60](Hex)2 (HexNAc)2 (Fuc)1 (3-8NeuAc)1 + (Man)3(GlcNAc)2_x000D_ [89](Hex)2 (HexNAc)2 (3-8NeuAc)2 + (Man)3(GlcNAc)2_x000D_ [87](Hex)1 (HexNAc)2 (Fuc)1 (3-8NeuAc)2 + (Man)3(GlcNAc)2	2522.95	2522.97	2522.99	2523	2523.02	2523.04	2523.05	2523.06	2523.07	2523.07	2523.1	2523.11	2523.1	2523.09	2523.11	2523.11	2523.12	2523.13	2523.12	2523.13	2.8757	2.85298	2.57063	2.70945	5.67699	5.36724	5.02135	5.06074	6.47421	7.08885	7.11862	5.55364	9.45589	9.24929	9.01194	8.72453	11.2073	10.4976	9.81072	9.04856	2.75219	5.28158	6.55883	9.11041	10.141	0.141661
112	2537.95	(Hex)2 (HexNAc)4 (Fuc)1 (GlcA)1 + (Man)3(GlcNAc)2	[78](Hex)2 (HexNAc)4 (Fuc)1 + (Man)3(GlcNAc)2_x000D_ [144](Hex)2 (HexNAc)4 (Fuc)1 (3-8NeuAc)1 (GlcA)1 + (Man)3(GlcNAc)2	0	0	0	2538.02	0	0	0	0	2538.11	0	0	2538.16	0	0	0	0	0	0	0	0	0	0	0	0.886853	0	0	0	0	0.548924	0	0	0.666934	0	0	0	0	0	0	0	0	0.221713	0	0.303964	0	0	0.443427
113	2538.95	(Hex)3 (HexNAc)2 (3-8NeuAc)2 + (Man)3(GlcNAc)2	[89](Hex)2 (HexNAc)2 (3-8NeuAc)2 + (Man)3(GlcNAc)2_x000D_ [131](Hex)3 (HexNAc)3 (3-8NeuAc)2 + (Man)3(GlcNAc)2	0	0	2539.01	0	2539.04	2539.08	2539.08	2539.09	0	2539.11	0	0	2539.13	2539.12	2539.13	2539.14	2539.11	2539.12	2539.1	2539.13	0	0	0.602323	0	1.65013	1.59291	1.41633	1.45052	0	1.55906	0	0	2.41661	2.63616	2.48302	2.17512	3.55708	3.07117	2.92523	2.65582	0.150581	1.52747	0.389764	2.42773	3.05233	0.301161
114	2546.91	(Hex)5 (HexNAc)2 (Fuc)2 + (Man)3(GlcNAc)2	[91](Hex)4 (HexNAc)2 (Fuc)2 + (Man)3(GlcNAc)2_x000D_ [82](Hex)5 (HexNAc)1 (Fuc)2 + (Man)3(GlcNAc)2_x000D_ [129](Hex)5 (HexNAc)2 (Fuc)3 + (Man)3(GlcNAc)2	2546.94	2546.95	2546.97	2547	2547.01	2547.06	2547.08	2547.07	0	2547.05	2547.08	0	2547.06	2547.06	2547.07	2547.07	2547.15	2547.16	2547.14	2547.16	1.12136	1.13029	1.14921	1.07245	2.31281	2.03764	2.00674	1.95288	0	2.52248	2.72395	0	3.14158	3.13968	2.93858	2.87202	3.82211	3.26726	3.17272	2.84298	1.11833	2.07752	1.31161	3.02296	3.27627	0.032711
115	2550.98	(Hex)2 (HexNAc)2 (Fuc)1 (3-8NeuAc)1 (6NeuAc)1 + (Man)3(GlcNAc)2	[63](Hex)2 (HexNAc)2 (Fuc)1 (6NeuAc)1 + (Man)3(GlcNAc)2_x000D_ [60](Hex)2 (HexNAc)2 (Fuc)1 (3-8NeuAc)1 + (Man)3(GlcNAc)2_x000D_ [93](Hex)2 (HexNAc)2 (3-8NeuAc)1 (6NeuAc)1 + (Man)3(GlcNAc)2_x000D_ [133](Hex)2 (HexNAc)3 (Fuc)1 (3-8NeuAc)1 (6NeuAc)1 + (Man)3(GlcNAc)2	2550.99	2551.01	2551.02	2551.03	2551.05	2551.07	2551.09	2551.09	2551.09	2551.11	2551.14	2551.14	2551.13	2551.13	2551.14	2551.14	2551.15	2551.16	2551.15	2551.16	6.60933	6.48385	6.24156	6.01387	14.4257	13.7799	12.9678	13.2888	17.2081	17.2563	16.7806	15.8061	25.108	24.984	23.7397	23.0666	30.3101	29.2121	27.8393	26.3367	6.33715	13.6156	16.7628	24.2246	28.4245	0.264105
116	2566.98	(Hex)3 (HexNAc)2 (3-8NeuAc)1 (6NeuAc)1 + (Man)3(GlcNAc)2	[66](Hex)3 (HexNAc)2 (6NeuAc)1 + (Man)3(GlcNAc)2_x000D_ [93](Hex)2 (HexNAc)2 (3-8NeuAc)1 (6NeuAc)1 + (Man)3(GlcNAc)2_x000D_ [134](Hex)3 (HexNAc)3 (3-8NeuAc)1 (6NeuAc)1 + (Man)3(GlcNAc)2	2566.96	2566.95	2567.04	2567	2567.02	2567.04	2567.07	2567.07	2567.06	2567.11	2567.14	2567.1	2567.11	2567.1	2567.12	2567.12	2567.13	2567.14	2567.13	2567.14	1.74233	1.61927	1.57347	1.47326	3.10511	2.82362	2.74097	2.69568	2.68161	2.51627	2.78607	2.25312	4.77255	4.97233	4.35927	4.37718	5.97451	5.02005	4.76432	4.17709	1.60208	2.84134	2.55927	4.62033	4.98399	0.111622
117	2578.98	(Hex)1 (HexNAc)5 (Fuc)1 (GlcA)1 + (Man)3(GlcNAc)2	[88](Hex)1 (HexNAc)5 (Fuc)1 + (Man)3(GlcNAc)2_x000D_ [95](Hex)1 (HexNAc)5 (GlcA)1 + (Man)3(GlcNAc)2	2579.02	2579.04	2579.06	2579.07	2579.08	2579.11	2579.12	2579.12	2579.13	2579.14	2579.17	2579.18	2579.17	2579.16	2579.18	2579.18	2579.19	2579.2	2579.19	2579.2	23.4398	23.0341	22.3086	22.0548	50.3414	48.9385	46.3446	48.4072	64.5728	64.8799	62.1338	62.8314	89.6095	89.1408	86.9717	85.4725	107.794	106.615	103.752	101.203	22.7093	48.5079	63.6045	87.7987	104.841	0.639816
118	2579.01	(Hex)2 (HexNAc)2 (Fuc)1 (6NeuAc)2 + (Man)3(GlcNAc)2	[63](Hex)2 (HexNAc)2 (Fuc)1 (6NeuAc)1 + (Man)3(GlcNAc)2_x000D_ [96](Hex)2 (HexNAc)2 (6NeuAc)2 + (Man)3(GlcNAc)2_x000D_ [135](Hex)2 (HexNAc)3 (Fuc)1 (6NeuAc)2 + (Man)3(GlcNAc)2	2579.02	2579.04	2579.06	2579.07	2579.08	2579.11	2579.12	2579.12	2579.13	2579.14	2579.17	2579.18	2579.17	2579.16	2579.18	2579.18	2579.19	2579.2	2579.19	2579.2	23.4398	23.0341	22.3086	22.0548	50.3414	48.9385	46.3446	48.4072	64.5728	64.8799	62.1338	62.8314	89.6095	89.1408	86.9717	85.4725	107.794	106.615	103.752	101.203	22.7093	48.5079	63.6045	87.7987	104.841	0.639816
119	2594.97	(Hex)2 (HexNAc)5 (GlcA)1 + (Man)3(GlcNAc)2	[95](Hex)1 (HexNAc)5 (GlcA)1 + (Man)3(GlcNAc)2_x000D_ [149](Hex)2 (HexNAc)5 (3-8NeuAc)1 (GlcA)1 + (Man)3(GlcNAc)2	2595	2595.01	2595.03	2595.04	2595.05	2595.08	2595.09	2595.09	2595.1	2595.11	2595.15	2595.15	2595.14	2595.13	2595.15	2595.15	2595.16	2595.17	2595.16	2595.17	3.28598	2.96706	2.77387	2.75234	5.60579	5.29967	5.2249	5.06131	2.96618	3.01798	2.81383	2.65881	8.72387	8.42879	7.98822	7.65303	10.0694	9.43333	9.09626	8.54899	2.94481	5.29792	2.8642	8.19848	9.287	0.247085
120	2595.01	(Hex)3 (HexNAc)2 (6NeuAc)2 + (Man)3(GlcNAc)2	[66](Hex)3 (HexNAc)2 (6NeuAc)1 + (Man)3(GlcNAc)2_x000D_ [96](Hex)2 (HexNAc)2 (6NeuAc)2 + (Man)3(GlcNAc)2_x000D_ [137](Hex)3 (HexNAc)3 (6NeuAc)2 + (Man)3(GlcNAc)2	2595	2595.01	2595.03	2595.04	2595.05	2595.08	2595.09	2595.09	2595.1	2595.11	2595.15	2595.15	2595.14	2595.13	2595.15	2595.15	2595.16	2595.17	2595.16	2595.17	3.28598	2.96706	2.77387	2.75234	5.60579	5.29967	5.2249	5.06131	2.96618	3.01798	2.81383	2.65881	8.72387	8.42879	7.98822	7.65303	10.0694	9.43333	9.09626	8.54899	2.94481	5.29792	2.8642	8.19848	9.287	0.247085
121	2608	(Hex)2 (HexNAc)3 (3-8NeuAc)1 (6NeuAc)1 + (Man)3(GlcNAc)2	[75](Hex)2 (HexNAc)3 (6NeuAc)1 + (Man)3(GlcNAc)2_x000D_ [93](Hex)2 (HexNAc)2 (3-8NeuAc)1 (6NeuAc)1 + (Man)3(GlcNAc)2_x000D_ [134](Hex)3 (HexNAc)3 (3-8NeuAc)1 (6NeuAc)1 + (Man)3(GlcNAc)2_x000D_ [133](Hex)2 (HexNAc)3 (Fuc)1 (3-8NeuAc)1 (6NeuAc)1 + (Man)3(GlcNAc)2	0	0	0	0	0	0	0	0	0	0	0	0	0	2608.12	0	0	0	2608.15	2608.15	2608.15	0	0	0	0	0	0	0	0	0	0	0	0	0	2.25476	0	0	0	2.13495	2.09657	1.984	0	0	0	0.563691	1.55388	0
122	2611.99	(Hex)3 (HexNAc)3 (Fuc)1 (6NeuAc)1 + (Man)3(GlcNAc)2	[99](Hex)3 (HexNAc)3 (6NeuAc)1 + (Man)3(GlcNAc)2_x000D_ [98](Hex)2 (HexNAc)3 (Fuc)1 (6NeuAc)1 + (Man)3(GlcNAc)2_x000D_ [153](Hex)3 (HexNAc)3 (Fuc)1 (6NeuAc)2 + (Man)3(GlcNAc)2_x000D_ [150](Hex)3 (HexNAc)3 (Fuc)1 (3-8NeuAc)1 (6NeuAc)1 + (Man)3(GlcNAc)2	2612	2612.01	2612.02	2612.04	2612.05	2612.08	2612.09	2612.09	2612.1	2612.11	2612.14	2612.15	2612.14	2612.13	2612.15	2612.15	2612.15	2612.16	2612.15	2612.17	1.319	1.24401	1.20873	1.19963	2.34405	2.24291	2.06163	2.08471	2.81592	2.73464	2.52227	2.61069	3.76129	3.70804	3.62806	3.3784	4.29579	3.77988	3.61312	3.27274	1.24284	2.18332	2.67088	3.61895	3.74038	0.054257
123	2636.04	(Hex)2 (HexNAc)3 (6NeuAc)2 + (Man)3(GlcNAc)2	[75](Hex)2 (HexNAc)3 (6NeuAc)1 + (Man)3(GlcNAc)2_x000D_ [96](Hex)2 (HexNAc)2 (6NeuAc)2 + (Man)3(GlcNAc)2_x000D_ [137](Hex)3 (HexNAc)3 (6NeuAc)2 + (Man)3(GlcNAc)2_x000D_ [135](Hex)2 (HexNAc)3 (Fuc)1 (6NeuAc)2 + (Man)3(GlcNAc)2_x000D_ [154](Hex)2 (HexNAc)3 (6NeuAc)3 + (Man)3(GlcNAc)2	2636.03	2636.05	2636.07	2636.08	2636.09	2636.12	2636.13	2636.13	2636.14	2636.15	2636.18	2636.19	2636.18	2636.17	2636.19	2636.19	2636.19	2636.2	2636.19	2636.21	1.53866	1.78152	1.43904	1.46591	3.22158	3.06546	2.62869	2.78838	3.39367	3.34026	3.06612	3.06098	4.57649	4.56541	4.36945	3.86084	5.21502	4.87537	4.53697	4.13105	1.55628	2.92603	3.21525	4.34305	4.6896	0.155942
124	2663.96	(Hex)6 (HexNAc)1 (Fuc)1 (3-8NeuAc)1 + (Man)3(GlcNAc)2	[85](Hex)6 (HexNAc)1 (Fuc)1 + (Man)3(GlcNAc)2_x000D_ [110](Hex)6 (HexNAc)1 (3-8NeuAc)1 + (Man)3(GlcNAc)2	2663.97	2663.99	0	0	0	2664.09	0	0	0	0	0	0	2664.13	0	0	0	0	0	0	2664.18	0.831573	0.799011	0	0	0	0.373156	0	0	0	0	0	0	0.78404	0	0	0	0	0	0	0.703618	0.407646	0.093289	0	0.19601	0.175904	0.470897
125	2666.01	(Hex)1 (HexNAc)5 (Fuc)1 (3-8NeuAc)1 + (Man)3(GlcNAc)2	[88](Hex)1 (HexNAc)5 (Fuc)1 + (Man)3(GlcNAc)2_x000D_ [138](Hex)1 (HexNAc)5 (Fuc)2 (3-8NeuAc)1 + (Man)3(GlcNAc)2	0	0	2666.11	2666	0	2665.96	0	0	0	0	0	2666.21	2666.17	0	0	0	0	0	0	2666.2	0	0	2.10521	1.97187	0	3.31699	0	0	0	0	0	3.28717	4.32271	0	0	0	0	0	0	3.54141	1.01927	0.829247	0.821792	1.08068	0.885354	1.17821
126	2677.06	(Hex)1 (HexNAc)4 (6NeuAc)2 + (Man)3(GlcNAc)2	[83](Hex)1 (HexNAc)4 (6NeuAc)1 + (Man)3(GlcNAc)2	0	0	2677.06	0	2677.07	2677.11	0	0	2677.13	0	2677.18	2677.18	2677.17	2677.16	0	2677.18	0	2677.2	2677.18	2677.2	0	0	0.501368	0	0.997007	0.869236	0	0	0.963181	0	0.93391	0.910744	1.24484	1.27371	0	0.985205	0	1.16097	1.12712	0.999061	0.125342	0.466561	0.701959	0.875938	0.821789	0.250684
127	2678.05	(HexNAc)5 (Fuc)2 (6NeuAc)1 + (Man)3(GlcNAc)2	[84](HexNAc)5 (Fuc)2 + (Man)3(GlcNAc)2_x000D_ [100](HexNAc)4 (Fuc)2 (6NeuAc)1 + (Man)3(GlcNAc)2_x000D_ [141](HexNAc)5 (Fuc)3 (6NeuAc)1 + (Man)3(GlcNAc)2	2678	0	0	0	0	0	0	0	0	0	0	0	0	0	0	0	0	0	0	0	0.710403	0	0	0	0	0	0	0	0	0	0	0	0	0	0	0	0	0	0	0	0.177601	0	0	0	0	0.355201
128	2680.03	(Hex)1 (HexNAc)4 (Fuc)1 (3-8NeuAc)1 (GlcA)1 + (Man)3(GlcNAc)2	[144](Hex)2 (HexNAc)4 (Fuc)1 (3-8NeuAc)1 (GlcA)1 + (Man)3(GlcNAc)2	0	0	2679.99	0	0	0	0	0	0	0	0	0	0	0	0	0	0	0	0	0	0	0	0.884567	0	0	0	0	0	0	0	0	0	0	0	0	0	0	0	0	0	0.221142	0	0	0	0	0.442283
129	2692.97	(Hex)5 (HexNAc)2 (Fuc)3 + (Man)3(GlcNAc)2	[114](Hex)5 (HexNAc)2 (Fuc)2 + (Man)3(GlcNAc)2_x000D_ [102](Hex)5 (HexNAc)1 (Fuc)3 + (Man)3(GlcNAc)2_x000D_ [148](Hex)5 (HexNAc)3 (Fuc)3 + (Man)3(GlcNAc)2_x000D_ [164](Hex)5 (HexNAc)2 (Fuc)3 (6NeuAc)1 + (Man)3(GlcNAc)2_x000D_ [159](Hex)5 (HexNAc)2 (Fuc)3 (3-8NeuAc)1 + (Man)3(GlcNAc)2	0	0	0	0	2693.02	2693.18	0	0	2693.11	0	2693.22	2693.21	2693.19	2693.18	2693.23	2693.22	2693.21	2693.24	2693.21	2693.24	0	0	0	0	2.59172	2.22884	0	0	2.20682	0	2.12801	2.06512	3.14502	3.06875	2.98569	2.61258	3.48797	3.06728	2.93067	2.67163	0	1.20514	1.59999	2.95301	3.03939	0
130	2694.04	(Hex)1 (HexNAc)5 (Fuc)1 (6NeuAc)1 + (Man)3(GlcNAc)2	[88](Hex)1 (HexNAc)5 (Fuc)1 + (Man)3(GlcNAc)2_x000D_ [103](Hex)1 (HexNAc)4 (Fuc)1 (6NeuAc)1 + (Man)3(GlcNAc)2	0	0	2694	0	0	0	0	0	0	0	0	0	0	0	0	0	0	0	0	0	0	0	1.1197	0	0	0	0	0	0	0	0	0	0	0	0	0	0	0	0	0	0.279926	0	0	0	0	0.559851
131	2742.03	(Hex)3 (HexNAc)3 (3-8NeuAc)2 + (Man)3(GlcNAc)2	[113](Hex)3 (HexNAc)2 (3-8NeuAc)2 + (Man)3(GlcNAc)2_x000D_ [147](Hex)3 (HexNAc)3 (Fuc)1 (3-8NeuAc)2 + (Man)3(GlcNAc)2_x000D_ [169](Hex)3 (HexNAc)3 (3-8NeuAc)2 (6NeuAc)1 + (Man)3(GlcNAc)2_x000D_ [167](Hex)3 (HexNAc)3 (3-8NeuAc)3 + (Man)3(GlcNAc)2	2742.03	2742.04	2742.06	2742.11	2742.12	2742.07	2742.11	2742.11	2742.12	2742.14	2742.17	2742.17	2742.17	2742.16	2742.18	2742.19	2742.19	2742.2	2742.19	2742.21	1.14627	1.0464	0.927384	1.04649	2.01417	1.90122	1.72758	1.76015	2.11159	2.05729	2.05476	1.91477	2.96935	2.92958	2.64522	2.49837	3.30521	2.91333	2.7158	2.43717	1.04164	1.85078	2.0346	2.76063	2.84288	0.089532
132	2742.05	(Hex)2 (HexNAc)3 (Fuc)3 (6NeuAc)1 + (Man)3(GlcNAc)2	[170](Hex)2 (HexNAc)3 (Fuc)3 (6NeuAc)2 + (Man)3(GlcNAc)2_x000D_ [168](Hex)2 (HexNAc)3 (Fuc)3 (3-8NeuAc)1 (6NeuAc)1 + (Man)3(GlcNAc)2	2742.03	2742.04	2742.06	2742.11	2742.12	2742.07	2742.11	2742.11	2742.12	2742.14	2742.17	2742.17	2742.17	2742.16	2742.18	2742.19	2742.19	2742.2	2742.19	2742.21	1.14627	1.0464	0.927384	1.04649	2.01417	1.90122	1.72758	1.76015	2.11159	2.05729	2.05476	1.91477	2.96935	2.92958	2.64522	2.49837	3.30521	2.91333	2.7158	2.43717	1.04164	1.85078	2.0346	2.76063	2.84288	0.089532
133	2754.06	(Hex)2 (HexNAc)3 (Fuc)1 (3-8NeuAc)1 (6NeuAc)1 + (Man)3(GlcNAc)2	[98](Hex)2 (HexNAc)3 (Fuc)1 (6NeuAc)1 + (Man)3(GlcNAc)2_x000D_ [121](Hex)2 (HexNAc)3 (3-8NeuAc)1 (6NeuAc)1 + (Man)3(GlcNAc)2_x000D_ [115](Hex)2 (HexNAc)2 (Fuc)1 (3-8NeuAc)1 (6NeuAc)1 + (Man)3(GlcNAc)2_x000D_ [150](Hex)3 (HexNAc)3 (Fuc)1 (3-8NeuAc)1 (6NeuAc)1 + (Man)3(GlcNAc)2	2754.07	2754.08	2754.12	2754.1	2754.12	2754.14	2754.16	2754.16	2754.17	2754.18	2754.22	2754.22	2754.21	2754.2	2754.22	2754.22	2754.23	2754.24	2754.23	2754.24	1.22589	1.13899	1.08221	0.986544	1.97304	1.88573	1.67356	1.78901	2.0874	2.03043	1.98741	1.90767	2.92078	2.87232	2.59773	2.48008	3.30312	3.01567	2.79386	2.55926	1.10841	1.83033	2.00323	2.71773	2.91798	0.100456
134	2770.06	(Hex)3 (HexNAc)3 (3-8NeuAc)1 (6NeuAc)1 + (Man)3(GlcNAc)2	[99](Hex)3 (HexNAc)3 (6NeuAc)1 + (Man)3(GlcNAc)2_x000D_ [121](Hex)2 (HexNAc)3 (3-8NeuAc)1 (6NeuAc)1 + (Man)3(GlcNAc)2_x000D_ [116](Hex)3 (HexNAc)2 (3-8NeuAc)1 (6NeuAc)1 + (Man)3(GlcNAc)2_x000D_ [152](Hex)4 (HexNAc)3 (3-8NeuAc)1 (6NeuAc)1 + (Man)3(GlcNAc)2_x000D_ [150](Hex)3 (HexNAc)3 (Fuc)1 (3-8NeuAc)1 (6NeuAc)1 + (Man)3(GlcNAc)2_x000D_ [157](Hex)3 (HexNAc)3 (3-8NeuAc)1 (6NeuAc)1 (GlcA)1 + (Man)3…	2770.06	2770.08	2770.1	2770.11	2770.12	2770.15	2770.16	2770.17	2770.17	2770.18	2770.22	2770.22	2770.21	2770.21	2770.23	2770.23	2770.23	2770.24	2770.23	2770.25	7.40014	7.19385	6.76225	6.67974	16.9099	15.9192	14.6823	15.6288	17.7355	17.8377	16.4541	16.7158	26.6712	26.6153	25.1031	24.4549	30.3832	29.6856	28.1826	26.6185	7.009	15.7851	17.1858	25.7111	28.7175	0.344703
135	2782.09	(Hex)2 (HexNAc)3 (Fuc)1 (6NeuAc)2 + (Man)3(GlcNAc)2	[98](Hex)2 (HexNAc)3 (Fuc)1 (6NeuAc)1 + (Man)3(GlcNAc)2_x000D_ [123](Hex)2 (HexNAc)3 (6NeuAc)2 + (Man)3(GlcNAc)2_x000D_ [118](Hex)2 (HexNAc)2 (Fuc)1 (6NeuAc)2 + (Man)3(GlcNAc)2_x000D_ [153](Hex)3 (HexNAc)3 (Fuc)1 (6NeuAc)2 + (Man)3(GlcNAc)2	2782.1	2782.12	2782.13	2782.14	2782.16	2782.19	2782.2	2782.2	2782.21	2782.22	2782.26	2782.26	2782.25	2782.25	2782.26	2782.27	2782.27	2782.28	2782.27	2782.29	10.9193	10.7249	10.1196	9.90175	22.6892	21.5017	19.8733	21.0825	26.7678	26.999	25.1086	25.5449	37.5619	37.3137	35.6206	34.6385	43.9897	42.8629	41.1389	39.0754	10.4164	21.2867	26.1051	36.2837	41.7667	0.483386
136	2787.04	(Hex)3 (HexNAc)4 (Fuc)1 (3-8NeuAc)1 + (Man)3(GlcNAc)2		0	0	0	0	0	0	0	0	0	0	0	0	0	0	0	0	2787.18	2787.16	0	2787.16	0	0	0	0	0	0	0	0	0	0	0	0	0	0	0	0	3.02153	2.57489	0	2.03729	0	0	0	0	1.90843	0
137	2798.09	(Hex)3 (HexNAc)3 (6NeuAc)2 + (Man)3(GlcNAc)2	[99](Hex)3 (HexNAc)3 (6NeuAc)1 + (Man)3(GlcNAc)2_x000D_ [123](Hex)2 (HexNAc)3 (6NeuAc)2 + (Man)3(GlcNAc)2_x000D_ [120](Hex)3 (HexNAc)2 (6NeuAc)2 + (Man)3(GlcNAc)2_x000D_ [153](Hex)3 (HexNAc)3 (Fuc)1 (6NeuAc)2 + (Man)3(GlcNAc)2_x000D_ [162](Hex)3 (HexNAc)3 (6NeuAc)2 (GlcA)1 + (Man)3(GlcNAc)2_x000D_ [176](Hex)3 (HexNAc)3 (6NeuAc)3 + (Man)3(GlcNAc)2_x000D_ [175](Hex)3 (HexNAc)3 (3-8NeuAc)1 (6NeuAc)2…	2798.09	2798.11	2798.13	2798.13	2798.15	2798.18	2798.19	2798.19	2798.2	2798.21	2798.25	2798.25	2798.24	2798.24	2798.25	2798.26	2798.26	2798.27	2798.26	2798.28	7.60708	7.37781	6.85312	6.6899	16.7259	15.8581	14.6472	15.4978	15.4358	15.5927	14.4058	14.5651	25.7822	25.6418	24.2363	23.4757	29.6739	28.4095	26.9381	25.5099	7.13198	15.6822	14.9999	24.784	27.6328	0.431801
138	2812.07	(Hex)1 (HexNAc)5 (Fuc)2 (3-8NeuAc)1 + (Man)3(GlcNAc)2	[109](Hex)1 (HexNAc)5 (Fuc)2 + (Man)3(GlcNAc)2_x000D_ [125](Hex)1 (HexNAc)5 (Fuc)1 (3-8NeuAc)1 + (Man)3(GlcNAc)2_x000D_ [180](Hex)1 (HexNAc)5 (Fuc)2 (3-8NeuAc)1 (6NeuAc)1 + (Man)3(GlcNAc)2	0	0	2812.11	2812.16	0	0	0	0	0	0	0	0	0	0	0	0	0	0	0	0	0	0	1.21335	1.21274	0	0	0	0	0	0	0	0	0	0	0	0	0	0	0	0	0.606523	0	0	0	0	0.700352
139	2813.09	(Hex)2 (HexNAc)3 (Fuc)2 (6NeuAc)1 (GlcA)1 + (Man)3(GlcNAc)2	[181](Hex)2 (HexNAc)3 (Fuc)2 (6NeuAc)2 (GlcA)1 + (Man)3(GlcNAc)2	0	0	0	0	0	0	0	0	0	2813.3	0	0	0	0	0	0	2813.33	0	0	0	0	0	0	0	0	0	0	0	0	2.22605	0	0	0	0	0	0	4.15875	0	0	0	0	0	0.556513	0	1.03969	0
140	2824.08	(Hex)1 (HexNAc)5 (3-8NeuAc)2 + (Man)3(GlcNAc)2		0	0	2824.04	0	0	0	0	0	0	2824.2	0	0	0	0	0	0	2824.22	0	0	0	0	0	1.03213	0	0	0	0	0	0	1.53594	0	0	0	0	0	0	2.70906	0	0	0	0.258032	0	0.383985	0	0.677266	0.516063
141	2824.1	(HexNAc)5 (Fuc)3 (6NeuAc)1 + (Man)3(GlcNAc)2	[104](HexNAc)5 (Fuc)3 + (Man)3(GlcNAc)2_x000D_ [127](HexNAc)5 (Fuc)2 (6NeuAc)1 + (Man)3(GlcNAc)2	0	0	2824.04	0	0	0	0	0	0	2824.2	0	0	0	0	0	0	2824.22	0	0	0	0	0	1.03213	0	0	0	0	0	0	1.53594	0	0	0	0	0	0	2.70906	0	0	0	0.258032	0	0.383985	0	0.677266	0.516063
142	2831.06	(Hex)4 (HexNAc)4 (6NeuAc)1 + (Man)3(GlcNAc)2	[191](Hex)4 (HexNAc)4 (6NeuAc)2 + (Man)3(GlcNAc)2_x000D_ [177](Hex)4 (HexNAc)4 (3-8NeuAc)1 (6NeuAc)1 + (Man)3(GlcNAc)2	2831.05	2831.08	2831.09	2831.1	2831.12	2831.15	2831.17	2831.17	2831.17	2831.19	2831.22	2831.22	2831.22	2831.21	2831.22	2831.23	2831.24	2831.24	2831.23	2831.25	0.649059	0.691928	0.59105	0.598599	1.29466	1.19671	1.09608	1.17929	1.22792	1.20314	1.12416	1.0882	1.80823	1.76954	1.56167	1.50467	1.95286	1.77154	1.63173	1.47475	0.632659	1.19169	1.16085	1.66103	1.70772	0.047163
143	2831.06	(Hex)3 (HexNAc)2 (Fuc)2 (3-8NeuAc)2 + (Man)3(GlcNAc)2		2831.05	2831.08	2831.09	2831.1	2831.12	2831.15	2831.17	2831.17	2831.17	2831.19	2831.22	2831.22	2831.22	2831.21	2831.22	2831.23	2831.24	2831.24	2831.23	2831.25	0.649059	0.691928	0.59105	0.598599	1.29466	1.19671	1.09608	1.17929	1.22792	1.20314	1.12416	1.0882	1.80823	1.76954	1.56167	1.50467	1.95286	1.77154	1.63173	1.47475	0.632659	1.19169	1.16085	1.66103	1.70772	0.047163
144	2842.08	(Hex)2 (HexNAc)4 (Fuc)1 (3-8NeuAc)1 (GlcA)1 + (Man)3(GlcNAc)2	[112](Hex)2 (HexNAc)4 (Fuc)1 (GlcA)1 + (Man)3(GlcNAc)2_x000D_ [128](Hex)1 (HexNAc)4 (Fuc)1 (3-8NeuAc)1 (GlcA)1 + (Man)3(GlcNAc)2_x000D_ [166](Hex)2 (HexNAc)5 (Fuc)1 (3-8NeuAc)1 (GlcA)1 + (Man)3(GlcNAc)2_x000D_ [158](Hex)2 (HexNAc)4 (Fuc)2 (3-8NeuAc)1 (GlcA)1 + (Man)3(GlcNAc)2_x000D_ [182](Hex)2 (HexNAc)4 (Fuc)1 (3-8NeuAc)2 (GlcA)1 + (Man)3(GlcNAc)2	2841.96	0	0	0	2842.03	0	0	2842.07	0	2842.19	2842.42	2842.21	2842.18	0	0	0	2842.11	0	2842.21	0	2.00938	0	0	0	3.79994	0	0	3.38557	0	3.69845	3.8393	3.40384	5.67656	0	0	0	6.65314	0	5.28759	0	0.502345	1.79638	2.7354	1.41914	2.98518	1.00469
145	2887.09	(Hex)2 (HexNAc)5 (Fuc)2 (GlcA)1 + (Man)3(GlcNAc)2	[193](Hex)2 (HexNAc)5 (Fuc)2 (3-8NeuAc)1 (GlcA)1 + (Man)3(GlcNAc)2	0	0	0	0	0	0	0	0	0	0	0	0	0	0	0	0	0	0	2887.24	0	0	0	0	0	0	0	0	0	0	0	0	0	0	0	0	0	0	0	1.4659	0	0	0	0	0	0.366476	0
146	2887.12	(Hex)3 (HexNAc)2 (Fuc)2 (6NeuAc)2 + (Man)3(GlcNAc)2	[174](Hex)3 (HexNAc)3 (Fuc)2 (6NeuAc)2 + (Man)3(GlcNAc)2	0	0	0	0	0	0	0	0	0	0	0	0	0	0	0	0	0	0	2887.24	0	0	0	0	0	0	0	0	0	0	0	0	0	0	0	0	0	0	0	1.4659	0	0	0	0	0	0.366476	0
147	2888.08	(Hex)3 (HexNAc)3 (Fuc)1 (3-8NeuAc)2 + (Man)3(GlcNAc)2	[131](Hex)3 (HexNAc)3 (3-8NeuAc)2 + (Man)3(GlcNAc)2_x000D_ [195](Hex)3 (HexNAc)3 (Fuc)1 (3-8NeuAc)2 (6NeuAc)1 + (Man)3(GlcNAc)2_x000D_ [194](Hex)3 (HexNAc)3 (Fuc)1 (3-8NeuAc)3 + (Man)3(GlcNAc)2	0	0	2888.12	0	2888.16	2888.2	2888.21	2888.21	2888.2	2888.22	2888.25	2888.28	2888.27	2888.26	2888.27	2888.25	2888.26	2888.27	0	2888.28	0	0	0.610036	0	1.12795	1.00239	0.920155	0.938445	1.10246	1.08283	1.07821	1.04471	1.47382	1.54628	1.36045	1.25885	1.68464	1.37266	0	1.14793	0.152509	0.997234	1.07705	1.40985	1.05131	0.305018
148	2896.05	(Hex)5 (HexNAc)3 (Fuc)3 + (Man)3(GlcNAc)2	[129](Hex)5 (HexNAc)2 (Fuc)3 + (Man)3(GlcNAc)2	0	0	0	0	0	2896.19	0	0	0	0	0	2896.33	0	0	2896.33	2896.29	0	0	2896.33	2896.31	0	0	0	0	0	0.70874	0	0	0	0	0	1.0771	0	0	1.37412	1.28653	0	0	1.46438	1.31978	0	0.177185	0.269276	0.665162	0.69604	0
149	2899.1	(Hex)2 (HexNAc)5 (3-8NeuAc)1 (GlcA)1 + (Man)3(GlcNAc)2	[119](Hex)2 (HexNAc)5 (GlcA)1 + (Man)3(GlcNAc)2_x000D_ [166](Hex)2 (HexNAc)5 (Fuc)1 (3-8NeuAc)1 (GlcA)1 + (Man)3(GlcNAc)2	0	0	0	0	0	0	0	0	0	0	0	2899.25	0	0	2899.24	2899.26	0	0	2899.31	2899.35	0	0	0	0	0	0	0	0	0	0	0	1.41284	0	0	1.69091	1.51141	0	0	2.16372	1.86679	0	0	0.353211	0.80058	1.00762	0
150	2916.11	(Hex)3 (HexNAc)3 (Fuc)1 (3-8NeuAc)1 (6NeuAc)1 + (Man)3(GlcNAc)2	[122](Hex)3 (HexNAc)3 (Fuc)1 (6NeuAc)1 + (Man)3(GlcNAc)2_x000D_ [134](Hex)3 (HexNAc)3 (3-8NeuAc)1 (6NeuAc)1 + (Man)3(GlcNAc)2_x000D_ [133](Hex)2 (HexNAc)3 (Fuc)1 (3-8NeuAc)1 (6NeuAc)1 + (Man)3(GlcNAc)2_x000D_ [200](Hex)3 (HexNAc)3 (Fuc)1 (3-8NeuAc)1 (6NeuAc)2 + (Man)3(GlcNAc)2_x000D_ [195](Hex)3 (HexNAc)3 (Fuc)1 (3-8NeuAc)2 (6NeuAc)1 + (Man)3(GlcNAc)2	2916.11	2916.13	2916.15	2916.14	2916.17	2916.2	2916.22	2916.22	2916.23	2916.24	2916.28	2916.28	2916.27	2916.27	2916.29	2916.29	2916.3	2916.3	2916.29	2916.31	1.83744	1.73909	1.6716	1.66874	3.57486	3.33501	3.02165	3.19346	3.51606	3.37324	3.29704	3.18618	4.90717	4.89707	4.49543	4.35443	5.4809	4.87983	4.53241	4.13	1.72922	3.28125	3.34313	4.66352	4.75578	0.079134
151	2926.06	(Hex)6 (HexNAc)2 (Fuc)2 (GlcA)1 + (Man)3(GlcNAc)2		0	0	0	0	0	2926.18	0	0	0	0	0	0	0	0	0	0	0	0	0	0	0	0	0	0	0	2.22549	0	0	0	0	0	0	0	0	0	0	0	0	0	0	0	0.556371	0	0	0	0
152	2932.11	(Hex)4 (HexNAc)3 (3-8NeuAc)1 (6NeuAc)1 + (Man)3(GlcNAc)2	[134](Hex)3 (HexNAc)3 (3-8NeuAc)1 (6NeuAc)1 + (Man)3(GlcNAc)2_x000D_ [177](Hex)4 (HexNAc)4 (3-8NeuAc)1 (6NeuAc)1 + (Man)3(GlcNAc)2_x000D_ [201](Hex)4 (HexNAc)3 (3-8NeuAc)1 (6NeuAc)2 + (Man)3(GlcNAc)2_x000D_ [198](Hex)4 (HexNAc)3 (3-8NeuAc)2 (6NeuAc)1 + (Man)3(GlcNAc)2	0	0	0	0	0	0	0	2932.2	0	0	0	0	0	0	0	0	0	2932.28	0	0	0	0	0	0	0	0	0	0.569204	0	0	0	0	0	0	0	0	0	0.616776	0	0	0	0.142301	0	0	0.154194	0
153	2944.15	(Hex)3 (HexNAc)3 (Fuc)1 (6NeuAc)2 + (Man)3(GlcNAc)2	[122](Hex)3 (HexNAc)3 (Fuc)1 (6NeuAc)1 + (Man)3(GlcNAc)2_x000D_ [137](Hex)3 (HexNAc)3 (6NeuAc)2 + (Man)3(GlcNAc)2_x000D_ [135](Hex)2 (HexNAc)3 (Fuc)1 (6NeuAc)2 + (Man)3(GlcNAc)2_x000D_ [183](Hex)3 (HexNAc)4 (Fuc)1 (6NeuAc)2 + (Man)3(GlcNAc)2_x000D_ [174](Hex)3 (HexNAc)3 (Fuc)2 (6NeuAc)2 + (Man)3(GlcNAc)2_x000D_ [188](Hex)3 (HexNAc)3 (Fuc)1 (6NeuAc)2 (GlcA)1 + (Man)3(GlcNAc)2_x000D_ [202](Hex)3 (H…	2944.13	2944.16	2944.18	2944.18	2944.2	2944.23	2944.25	2944.25	2944.26	2944.27	2944.31	2944.32	2944.3	2944.3	2944.32	2944.32	2944.33	2944.33	2944.32	2944.34	1.54065	1.43191	1.38132	1.35005	3.0167	2.7687	2.46367	2.66555	2.8778	2.81193	2.69028	2.66103	4.0239	4.01228	3.71331	3.53294	4.43149	3.97246	3.75425	3.40618	1.42598	2.72865	2.76026	3.82061	3.89109	0.083556
154	2968.19	(Hex)2 (HexNAc)3 (6NeuAc)3 + (Man)3(GlcNAc)2	[123](Hex)2 (HexNAc)3 (6NeuAc)2 + (Man)3(GlcNAc)2_x000D_ [176](Hex)3 (HexNAc)3 (6NeuAc)3 + (Man)3(GlcNAc)2	0	0	0	0	0	0	0	0	0	2968.2	0	2968.24	0	0	0	0	0	0	0	0	0	0	0	0	0	0	0	0	0	0.975992	0	0.970672	0	0	0	0	0	0	0	0	0	0	0.486666	0	0	0
155	2969.07	(Hex)6 (HexNAc)4 (Fuc)1 + (Man)3(GlcNAc)2		2969.11	0	2969.16	2969.19	2969.22	2969.28	2969.3	2969.22	2969.24	0	2969.29	0	2969.27	2969.27	2969.32	2969.29	2969.26	2969.33	2969.32	0	0.694367	0	0.602074	0.640264	1.3716	1.29079	1.15558	1.16777	1.14548	0	1.08855	0	1.80738	1.73389	1.63702	1.48608	1.94928	1.74115	1.61376	0	0.484176	1.24644	0.558508	1.66609	1.32604	0.324997
156	2969.18	(Hex)1 (HexNAc)4 (Fuc)2 (6NeuAc)2 + (Man)3(GlcNAc)2		2969.11	0	2969.16	2969.19	2969.22	2969.28	2969.3	2969.22	2969.24	0	2969.29	0	2969.27	2969.27	2969.32	2969.29	2969.26	2969.33	2969.32	0	0.694367	0	0.602074	0.640264	1.3716	1.29079	1.15558	1.16777	1.14548	0	1.08855	0	1.80738	1.73389	1.63702	1.48608	1.94928	1.74115	1.61376	0	0.484176	1.24644	0.558508	1.66609	1.32604	0.324997
157	2987.15	(Hex)3 (HexNAc)3 (3-8NeuAc)1 (6NeuAc)1 (GlcA)1 + (Man)3(GlcNAc)2	[134](Hex)3 (HexNAc)3 (3-8NeuAc)1 (6NeuAc)1 + (Man)3(GlcNAc)2	0	0	0	0	0	0	0	0	0	0	0	0	0	0	0	2987.42	0	2987.38	0	0	0	0	0	0	0	0	0	0	0	0	0	0	0	0	0	1.5262	0	1.72989	0	0	0	0	0	0.381551	0.432472	0
158	2988.14	(Hex)2 (HexNAc)4 (Fuc)2 (3-8NeuAc)1 (GlcA)1 + (Man)3(GlcNAc)2	[144](Hex)2 (HexNAc)4 (Fuc)1 (3-8NeuAc)1 (GlcA)1 + (Man)3(GlcNAc)2_x000D_ [193](Hex)2 (HexNAc)5 (Fuc)2 (3-8NeuAc)1 (GlcA)1 + (Man)3(GlcNAc)2	0	0	0	0	2988.2	2988.24	2988.27	0	0	0	0	0	0	0	2988.39	0	0	0	0	0	0	0	0	0	1.3718	1.29886	1.16307	0	0	0	0	0	0	0	1.59033	0	0	0	0	0	0	0.958434	0	0.397583	0	0
159	2997.1	(Hex)5 (HexNAc)2 (Fuc)3 (3-8NeuAc)1 + (Man)3(GlcNAc)2	[129](Hex)5 (HexNAc)2 (Fuc)3 + (Man)3(GlcNAc)2_x000D_ [186](Hex)6 (HexNAc)2 (Fuc)3 (3-8NeuAc)1 + (Man)3(GlcNAc)2	2997.15	2997.18	2997.19	2997.2	2997.22	2997.25	2997.26	2997.26	2997.27	2997.29	2997.33	2997.33	2997.32	2997.31	2997.33	2997.33	2997.34	2997.35	2997.34	2997.36	2.50318	2.39415	2.30108	2.13497	3.66884	3.3464	2.96284	3.27483	3.02571	3.10495	2.80296	2.85765	5.61454	5.4643	5.14927	4.90932	6.06928	5.5836	5.35394	4.8501	2.33335	3.31323	2.94781	5.28436	5.46423	0.15592
160	3013.09	(Hex)6 (HexNAc)2 (Fuc)2 (3-8NeuAc)1 + (Man)3(GlcNAc)2	[186](Hex)6 (HexNAc)2 (Fuc)3 (3-8NeuAc)1 + (Man)3(GlcNAc)2	0	0	0	3013.18	0	0	0	0	0	0	0	0	0	0	0	0	0	0	0	0	0	0	0	0.451177	0	0	0	0	0	0	0	0	0	0	0	0	0	0	0	0	0.112794	0	0	0	0	0.225588
161	3014.16	(Hex)2 (HexNAc)5 (3-8NeuAc)1 (6NeuAc)1 + (Man)3(GlcNAc)2	[187](Hex)2 (HexNAc)5 (Fuc)1 (3-8NeuAc)1 (6NeuAc)1 + (Man)3(GlcNAc)2	3014.14	0	3014.17	0	3014.21	3014.24	3014.25	3014.25	0	0	0	0	3014.3	3014.3	3014.32	3014.33	3014.33	3014.33	3014.32	3014.35	0.475731	0	0.519293	0	0.711909	0.591889	0.544583	0.540868	0	0	0	0	0.989298	0.939041	0.907884	0.922807	0.978367	0.92975	0.950457	0.843538	0.248756	0.597312	0	0.939758	0.925528	0.287789
162	3015.18	(Hex)3 (HexNAc)3 (6NeuAc)2 (GlcA)1 + (Man)3(GlcNAc)2	[137](Hex)3 (HexNAc)3 (6NeuAc)2 + (Man)3(GlcNAc)2_x000D_ [188](Hex)3 (HexNAc)3 (Fuc)1 (6NeuAc)2 (GlcA)1 + (Man)3(GlcNAc)2	0	3015.17	0	0	0	0	0	0	3015.28	3015.29	3015.32	3015.33	0	0	0	0	0	0	0	0	0	0.363586	0	0	0	0	0	0	0.568881	0.582592	0.589985	0.525055	0	0	0	0	0	0	0	0	0.090896	0	0.566628	0	0	0.181793
163	3025.1	(Hex)6 (HexNAc)2 (3-8NeuAc)2 + (Man)3(GlcNAc)2		3025.19	3025.19	3025.21	3025.2	3025.27	3025.27	3025.28	3025.28	3025.29	3025.34	3025.34	3025.34	3025.33	3025.33	3025.35	3025.36	3025.36	3025.37	3025.36	3025.38	1.15953	1.05586	0.892473	0.969739	1.62331	1.4338	1.27394	1.38557	1.2656	1.32046	1.15047	1.20876	2.16338	2.08736	2.01853	1.78391	2.31121	2.05762	1.96187	1.67413	1.0194	1.42916	1.23632	2.0133	2.00121	0.114806
164	3025.13	(Hex)5 (HexNAc)2 (Fuc)3 (6NeuAc)1 + (Man)3(GlcNAc)2	[129](Hex)5 (HexNAc)2 (Fuc)3 + (Man)3(GlcNAc)2	3025.19	3025.19	3025.21	3025.2	3025.27	3025.27	3025.28	3025.28	3025.29	3025.34	3025.34	3025.34	3025.33	3025.33	3025.35	3025.36	3025.36	3025.37	3025.36	3025.38	1.15953	1.05586	0.892473	0.969739	1.62331	1.4338	1.27394	1.38557	1.2656	1.32046	1.15047	1.20876	2.16338	2.08736	2.01853	1.78391	2.31121	2.05762	1.96187	1.67413	1.0194	1.42916	1.23632	2.0133	2.00121	0.114806
165	3042.19	(Hex)2 (HexNAc)5 (6NeuAc)2 + (Man)3(GlcNAc)2		0	0	0	0	3042.22	3042.25	0	3042.26	0	0	0	0	0	0	3042.33	0	0	0	0	0	0	0	0	0	0.58302	0.572497	0	0.69367	0	0	0	0	0	0	0.692564	0	0	0	0	0	0	0.462297	0	0.173141	0	0
166	3045.16	(Hex)2 (HexNAc)5 (Fuc)1 (3-8NeuAc)1 (GlcA)1 + (Man)3(GlcNAc)2	[149](Hex)2 (HexNAc)5 (3-8NeuAc)1 (GlcA)1 + (Man)3(GlcNAc)2_x000D_ [144](Hex)2 (HexNAc)4 (Fuc)1 (3-8NeuAc)1 (GlcA)1 + (Man)3(GlcNAc)2_x000D_ [193](Hex)2 (HexNAc)5 (Fuc)2 (3-8NeuAc)1 (GlcA)1 + (Man)3(GlcNAc)2	3045.13	0	0	3045.2	3045.21	3045.24	3045.25	0	3045.27	3045.28	3045.33	3045.33	3045.32	3045.31	3045.33	3045.34	3045.35	3045.35	3045.34	3045.36	0.477853	0	0	0.398825	0.779533	0.734859	0.703057	0	1.06701	0.943979	1.01005	0.814459	1.21499	1.18855	1.12879	1.09345	1.43909	1.33441	1.38895	1.21111	0.219169	0.554362	0.958874	1.15644	1.34339	0.255123
167	3046.15	(Hex)3 (HexNAc)3 (3-8NeuAc)3 + (Man)3(GlcNAc)2	[131](Hex)3 (HexNAc)3 (3-8NeuAc)2 + (Man)3(GlcNAc)2_x000D_ [194](Hex)3 (HexNAc)3 (Fuc)1 (3-8NeuAc)3 + (Man)3(GlcNAc)2	0	0	0	0	0	0	0	3046.27	0	0	0	0	0	0	0	0	0	0	0	0	0	0	0	0	0	0	0	0.650011	0	0	0	0	0	0	0	0	0	0	0	0	0	0.162503	0	0	0	0
168	3046.18	(Hex)2 (HexNAc)3 (Fuc)3 (3-8NeuAc)1 (6NeuAc)1 + (Man)3(GlcNAc)2	[132](Hex)2 (HexNAc)3 (Fuc)3 (6NeuAc)1 + (Man)3(GlcNAc)2	0	0	0	0	0	0	0	3046.27	0	0	0	0	0	0	0	0	0	0	0	0	0	0	0	0	0	0	0	0.650011	0	0	0	0	0	0	0	0	0	0	0	0	0	0.162503	0	0	0	0
169	3074.18	(Hex)3 (HexNAc)3 (3-8NeuAc)2 (6NeuAc)1 + (Man)3(GlcNAc)2	[134](Hex)3 (HexNAc)3 (3-8NeuAc)1 (6NeuAc)1 + (Man)3(GlcNAc)2_x000D_ [131](Hex)3 (HexNAc)3 (3-8NeuAc)2 + (Man)3(GlcNAc)2_x000D_ [203](Hex)3 (HexNAc)4 (3-8NeuAc)2 (6NeuAc)1 + (Man)3(GlcNAc)2_x000D_ [198](Hex)4 (HexNAc)3 (3-8NeuAc)2 (6NeuAc)1 + (Man)3(GlcNAc)2_x000D_ [195](Hex)3 (HexNAc)3 (Fuc)1 (3-8NeuAc)2 (6NeuAc)1 + (Man)3(GlcNAc)2	3074.18	3074.2	3074.22	3074.23	3074.25	3074.28	3074.3	3074.3	3074.31	3074.32	3074.36	3074.37	3074.35	3074.35	3074.37	3074.37	3074.38	3074.38	3074.37	3074.39	6.61236	6.50046	6.01364	5.84401	14.2804	13.0252	11.5382	12.9469	13.7183	14.2433	12.3629	13.0321	21.3899	21.3837	20.0967	19.3333	25.3918	24.125	23.0421	21.2597	6.24262	12.9477	13.3392	20.5509	23.4547	0.371714
170	3074.21	(Hex)2 (HexNAc)3 (Fuc)3 (6NeuAc)2 + (Man)3(GlcNAc)2	[132](Hex)2 (HexNAc)3 (Fuc)3 (6NeuAc)1 + (Man)3(GlcNAc)2_x000D_ [204](Hex)2 (HexNAc)4 (Fuc)3 (6NeuAc)2 + (Man)3(GlcNAc)2_x000D_ [199](Hex)3 (HexNAc)3 (Fuc)3 (6NeuAc)2 + (Man)3(GlcNAc)2_x000D_ [209](Hex)2 (HexNAc)3 (Fuc)3 (6NeuAc)2 (GlcA)1 + (Man)3(GlcNAc)2	3074.18	3074.2	3074.22	3074.23	3074.25	3074.28	3074.3	3074.3	3074.31	3074.32	3074.36	3074.37	3074.35	3074.35	3074.37	3074.37	3074.38	3074.38	3074.37	3074.39	6.61236	6.50046	6.01364	5.84401	14.2804	13.0252	11.5382	12.9469	13.7183	14.2433	12.3629	13.0321	21.3899	21.3837	20.0967	19.3333	25.3918	24.125	23.0421	21.2597	6.24262	12.9477	13.3392	20.5509	23.4547	0.371714
171	3084.13	(Hex)6 (HexNAc)2 (Fuc)1 (3-8NeuAc)1 (GlcA)1 + (Man)3(GlcNAc)2		0	0	0	0	3084.22	3084.27	0	0	0	0	0	0	0	0	0	0	0	0	0	3084.39	0	0	0	0	0.576306	0.515576	0	0	0	0	0	0	0	0	0	0	0	0	0	0.571021	0	0.27297	0	0	0.142755	0
172	3089.18	(Hex)3 (HexNAc)5 (6NeuAc)1 (GlcA)1 + (Man)3(GlcNAc)2	[196](Hex)3 (HexNAc)5 (Fuc)1 (6NeuAc)1 (GlcA)1 + (Man)3(GlcNAc)2	0	0	0	3089.19	0	0	0	0	3089.28	3089.31	3089.35	0	0	0	0	0	0	0	0	0	0	0	0	0.70317	0	0	0	0	0.796234	0.791535	0.662048	0	0	0	0	0	0	0	0	0	0.175793	0	0.562454	0	0	0.351585
173	3089.18	(Hex)2 (HexNAc)3 (Fuc)2 (3-8NeuAc)2 (GlcA)1 + (Man)3(GlcNAc)2	[197](Hex)2 (HexNAc)3 (Fuc)3 (3-8NeuAc)2 (GlcA)1 + (Man)3(GlcNAc)2	0	0	0	3089.19	0	0	0	0	3089.28	3089.31	3089.35	0	0	0	0	0	0	0	0	0	0	0	0	0.70317	0	0	0	0	0.796234	0.791535	0.662048	0	0	0	0	0	0	0	0	0	0.175793	0	0.562454	0	0	0.351585
174	3090.2	(Hex)3 (HexNAc)3 (Fuc)2 (6NeuAc)2 + (Man)3(GlcNAc)2	[153](Hex)3 (HexNAc)3 (Fuc)1 (6NeuAc)2 + (Man)3(GlcNAc)2_x000D_ [146](Hex)3 (HexNAc)2 (Fuc)2 (6NeuAc)2 + (Man)3(GlcNAc)2_x000D_ [199](Hex)3 (HexNAc)3 (Fuc)3 (6NeuAc)2 + (Man)3(GlcNAc)2_x000D_ [213](Hex)3 (HexNAc)3 (Fuc)2 (3-8NeuAc)1 (6NeuAc)2 + (Man)3(GlcNAc)2	3090.14	3090.18	3090.19	0	3090.23	3090.26	3090.27	3090.28	0	0	0	3090.34	3090.33	3090.33	3090.35	3090.36	3090.36	3090.37	3090.35	3090.38	0.95782	0.856491	0.794091	0	1.57766	1.46176	1.35429	1.39321	0	0	0	0.655059	1.9551	1.95306	1.77305	1.69795	2.22869	1.90194	1.85436	1.63557	0.652101	1.44673	0.163765	1.84479	1.90514	0.439938
175	3102.22	(Hex)3 (HexNAc)3 (3-8NeuAc)1 (6NeuAc)2 + (Man)3(GlcNAc)2	[137](Hex)3 (HexNAc)3 (6NeuAc)2 + (Man)3(GlcNAc)2_x000D_ [134](Hex)3 (HexNAc)3 (3-8NeuAc)1 (6NeuAc)1 + (Man)3(GlcNAc)2_x000D_ [210](Hex)3 (HexNAc)4 (3-8NeuAc)1 (6NeuAc)2 + (Man)3(GlcNAc)2_x000D_ [201](Hex)4 (HexNAc)3 (3-8NeuAc)1 (6NeuAc)2 + (Man)3(GlcNAc)2_x000D_ [200](Hex)3 (HexNAc)3 (Fuc)1 (3-8NeuAc)1 (6NeuAc)2 + (Man)3(GlcNAc)2	3102.22	3102.24	3102.26	3102.27	3102.29	3102.33	3102.34	3102.34	3102.35	3102.36	3102.41	3102.41	3102.4	3102.39	3102.42	3102.42	3102.43	3102.44	3102.43	3102.45	45.6465	45.7577	43.0263	42.1941	105.085	97.368	87.7925	99.6324	108.451	114.564	100.375	108.319	163.04	167.646	161.474	161.002	205.326	195.141	193.724	184.683	44.1562	97.4695	107.928	163.291	194.718	1.81772
176	3130.25	(Hex)3 (HexNAc)3 (6NeuAc)3 + (Man)3(GlcNAc)2	[137](Hex)3 (HexNAc)3 (6NeuAc)2 + (Man)3(GlcNAc)2_x000D_ [154](Hex)2 (HexNAc)3 (6NeuAc)3 + (Man)3(GlcNAc)2_x000D_ [202](Hex)3 (HexNAc)3 (Fuc)1 (6NeuAc)3 + (Man)3(GlcNAc)2	3130.24	3130.27	3130.29	3130.3	3130.32	3130.35	3130.37	3130.37	3130.38	3130.39	3130.44	3130.44	3130.43	3130.42	3130.44	3130.45	3130.46	3130.46	3130.45	3130.47	14.1638	13.974	12.921	12.5572	33.1734	30.2656	26.3482	30.4843	31.6374	33.4543	28.6348	30.8684	48.1672	49.0624	46.1104	45.1407	58.5192	55.411	53.4249	49.7	13.404	30.0679	31.1487	47.1202	54.2638	0.785815
177	3135.19	(Hex)4 (HexNAc)4 (3-8NeuAc)1 (6NeuAc)1 + (Man)3(GlcNAc)2	[142](Hex)4 (HexNAc)4 (6NeuAc)1 + (Man)3(GlcNAc)2_x000D_ [152](Hex)4 (HexNAc)3 (3-8NeuAc)1 (6NeuAc)1 + (Man)3(GlcNAc)2_x000D_ [205](Hex)4 (HexNAc)4 (Fuc)1 (3-8NeuAc)1 (6NeuAc)1 + (Man)3(GlcNAc)2_x000D_ [220](Hex)4 (HexNAc)4 (3-8NeuAc)1 (6NeuAc)2 + (Man)3(GlcNAc)2_x000D_ [217](Hex)4 (HexNAc)4 (3-8NeuAc)2 (6NeuAc)1 + (Man)3(GlcNAc)2	3135.18	3135.21	3135.22	3135.23	3135.25	3135.29	3135.3	3135.3	3135.31	3135.32	3135.36	3135.36	3135.36	3135.35	3135.37	3135.37	3135.38	3135.39	3135.37	3135.39	2.82209	2.7153	2.36598	2.41511	6.21026	5.5305	4.82364	5.41148	5.21941	5.5121	4.67783	4.91005	7.84057	7.86328	7.12446	6.59628	8.34259	7.6784	7.20515	6.25614	2.57962	5.49397	5.07985	7.35615	7.37057	0.223535
178	3141.15	(Hex)6 (HexNAc)3 (3-8NeuAc)1 (GlcA)1 + (Man)3(GlcNAc)2		0	0	0	0	0	0	0	0	0	0	3141.37	3141.4	0	0	0	0	0	0	0	0	0	0	0	0	0	0	0	0	0	0	0.307685	0.261742	0	0	0	0	0	0	0	0	0	0	0.142357	0	0	0
179	3143.24	(Hex)2 (HexNAc)4 (3-8NeuAc)1 (6NeuAc)2 + (Man)3(GlcNAc)2	[210](Hex)3 (HexNAc)4 (3-8NeuAc)1 (6NeuAc)2 + (Man)3(GlcNAc)2	3143.22	0	0	0	3143.29	3143.32	3143.33	3143.34	0	0	0	0	0	0	0	0	0	0	0	0	1.00654	0	0	0	1.72322	1.52875	1.29214	1.44715	0	0	0	0	0	0	0	0	0	0	0	0	0.251634	1.49781	0	0	0	0.503269
180	3144.23	(Hex)1 (HexNAc)5 (Fuc)2 (3-8NeuAc)1 (6NeuAc)1 + (Man)3(GlcNAc)2	[138](Hex)1 (HexNAc)5 (Fuc)2 (3-8NeuAc)1 + (Man)3(GlcNAc)2_x000D_ [208](Hex)1 (HexNAc)5 (Fuc)3 (3-8NeuAc)1 (6NeuAc)1 + (Man)3(GlcNAc)2	0	0	0	0	0	0	0	0	3144.35	3144.36	3144.4	3144.4	0	0	0	0	0	0	0	0	0	0	0	0	0	0	0	0	1.76031	1.81045	1.58849	1.65251	0	0	0	0	0	0	0	0	0	0	1.70294	0	0	0
181	3145.25	(Hex)2 (HexNAc)3 (Fuc)2 (6NeuAc)2 (GlcA)1 + (Man)3(GlcNAc)2	[139](Hex)2 (HexNAc)3 (Fuc)2 (6NeuAc)1 (GlcA)1 + (Man)3(GlcNAc)2_x000D_ [209](Hex)2 (HexNAc)3 (Fuc)3 (6NeuAc)2 (GlcA)1 + (Man)3(GlcNAc)2	0	3145.24	3145.26	3145.27	0	0	0	0	0	0	0	0	3145.4	3145.39	3145.41	3145.41	3145.42	3145.43	3145.42	3145.44	0	1.81326	1.62743	1.5443	0	0	0	0	0	0	0	0	4.29498	4.30603	3.89633	3.81813	5.07571	4.3959	4.21652	3.73946	1.24625	0	0	4.07887	4.3569	0.838406
182	3146.2	(Hex)2 (HexNAc)4 (Fuc)1 (3-8NeuAc)2 (GlcA)1 + (Man)3(GlcNAc)2	[144](Hex)2 (HexNAc)4 (Fuc)1 (3-8NeuAc)1 (GlcA)1 + (Man)3(GlcNAc)2	3146.22	0	0	0	3146.29	3146.33	3146.34	3146.34	0	0	0	0	0	0	0	0	0	0	0	0	1.94855	0	0	0	3.47532	3.07282	2.84672	3.048	0	0	0	0	0	0	0	0	0	0	0	0	0.487137	3.11071	0	0	0	0.974275
183	3147.23	(Hex)3 (HexNAc)4 (Fuc)1 (6NeuAc)2 + (Man)3(GlcNAc)2	[153](Hex)3 (HexNAc)3 (Fuc)1 (6NeuAc)2 + (Man)3(GlcNAc)2	0	0	0	0	0	0	0	0	3147.35	3147.37	3147.41	3147.41	0	0	0	0	0	0	0	0	0	0	0	0	0	0	0	0	0.910411	0.968077	0.766158	0.816018	0	0	0	0	0	0	0	0	0	0	0.865166	0	0	0
184	3148.18	(Hex)3 (HexNAc)5 (3-8NeuAc)2 + (Man)3(GlcNAc)2		0	3148.24	3148.25	3148.26	0	0	0	0	0	0	0	0	3148.39	3148.38	3148.4	3148.37	3148.4	3148.41	3148.41	3148.42	0	0.701299	0.619094	0.656559	0	0	0	0	0	0	0	0	1.74291	1.78548	1.59168	1.51677	1.91	1.72472	1.60335	1.42602	0.494238	0	0	1.65921	1.66602	0.331201
185	3148.21	(Hex)2 (HexNAc)5 (Fuc)3 (6NeuAc)1 + (Man)3(GlcNAc)2		0	3148.24	3148.25	3148.26	0	0	0	0	0	0	0	0	3148.39	3148.38	3148.4	3148.37	3148.4	3148.41	3148.41	3148.42	0	0.701299	0.619094	0.656559	0	0	0	0	0	0	0	0	1.74291	1.78548	1.59168	1.51677	1.91	1.72472	1.60335	1.42602	0.494238	0	0	1.65921	1.66602	0.331201
186	3159.15	(Hex)6 (HexNAc)2 (Fuc)3 (3-8NeuAc)1 + (Man)3(GlcNAc)2	[160](Hex)6 (HexNAc)2 (Fuc)2 (3-8NeuAc)1 + (Man)3(GlcNAc)2_x000D_ [159](Hex)5 (HexNAc)2 (Fuc)3 (3-8NeuAc)1 + (Man)3(GlcNAc)2	0	0	0	0	0	3159.31	0	3159.32	0	3159.35	0	3159.39	3159.37	3159.37	0	0	3159.41	3159.41	3159.39	3159.42	0	0	0	0	0	0.695225	0	0.61161	0	0.822267	0	0.706676	0.65146	0.770302	0	0	0.696582	0.541946	0.515966	0.481486	0	0.326709	0.382236	0.35544	0.558995	0
187	3160.22	(Hex)2 (HexNAc)5 (Fuc)1 (3-8NeuAc)1 (6NeuAc)1 + (Man)3(GlcNAc)2	[161](Hex)2 (HexNAc)5 (3-8NeuAc)1 (6NeuAc)1 + (Man)3(GlcNAc)2	0	0	0	0	0	0	3160.32	0	3160.33	0	3160.38	0	0	0	3160.4	3160.37	0	0	0	0	0	0	0	0	0	0	0.618711	0	0.630885	0	0.594372	0	0	0	0.783281	0.829004	0	0	0	0	0	0.154678	0.306314	0.403071	0	0
188	3161.24	(Hex)3 (HexNAc)3 (Fuc)1 (6NeuAc)2 (GlcA)1 + (Man)3(GlcNAc)2	[153](Hex)3 (HexNAc)3 (Fuc)1 (6NeuAc)2 + (Man)3(GlcNAc)2_x000D_ [162](Hex)3 (HexNAc)3 (6NeuAc)2 (GlcA)1 + (Man)3(GlcNAc)2	3161.21	0	0	0	0	0	0	0	0	0	0	0	0	0	0	0	0	0	0	0	0.708658	0	0	0	0	0	0	0	0	0	0	0	0	0	0	0	0	0	0	0	0.177164	0	0	0	0	0.354329
189	3162.2	(Hex)3 (HexNAc)4 (3-8NeuAc)2 (GlcA)1 + (Man)3(GlcNAc)2		0	3162.23	3162.25	3162.26	3162.28	3162.31	0	3162.33	0	0	0	0	3162.39	3162.38	0	0	3162.42	3162.43	3162.41	3162.43	0	0.657041	0.646799	0.616383	1.48431	1.27199	0	1.25676	0	0	0	0	1.71683	1.73071	0	0	2.12479	1.86481	1.78311	1.63281	0.480056	1.00327	0	0.861884	1.85138	0.320503
190	3162.22	(Hex)2 (HexNAc)4 (Fuc)3 (6NeuAc)1 (GlcA)1 + (Man)3(GlcNAc)2		0	3162.23	3162.25	3162.26	3162.28	3162.31	0	3162.33	0	0	0	0	3162.39	3162.38	0	0	3162.42	3162.43	3162.41	3162.43	0	0.657041	0.646799	0.616383	1.48431	1.27199	0	1.25676	0	0	0	0	1.71683	1.73071	0	0	2.12479	1.86481	1.78311	1.63281	0.480056	1.00327	0	0.861884	1.85138	0.320503
191	3163.22	(Hex)4 (HexNAc)4 (6NeuAc)2 + (Man)3(GlcNAc)2	[142](Hex)4 (HexNAc)4 (6NeuAc)1 + (Man)3(GlcNAc)2_x000D_ [211](Hex)4 (HexNAc)5 (6NeuAc)2 + (Man)3(GlcNAc)2_x000D_ [224](Hex)4 (HexNAc)4 (6NeuAc)3 + (Man)3(GlcNAc)2_x000D_ [220](Hex)4 (HexNAc)4 (3-8NeuAc)1 (6NeuAc)2 + (Man)3(GlcNAc)2	0	0	0	0	0	0	3163.34	0	3163.34	3163.36	3163.41	3163.41	0	0	3163.41	3163.41	0	0	0	0	0	0	0	0	0	0	0.938627	0	1.0923	1.22073	1.01931	1.09258	0	0	1.46954	1.36453	0	0	0	0	0	0.234657	1.10623	0.708518	0	0
192	3178.22	(Hex)3 (HexNAc)4 (Fuc)2 (6NeuAc)1 (GlcA)1 + (Man)3(GlcNAc)2	[222](Hex)3 (HexNAc)4 (Fuc)2 (3-8NeuAc)1 (6NeuAc)1 (GlcA)1 + (Man)3(GlcNAc)2	0	0	0	0	3178.25	3178.27	3178.28	3178.29	0	0	0	0	0	0	0	0	0	0	0	0	0	0	0	0	0.727889	0.671748	0.606471	0.630291	0	0	0	0	0	0	0	0	0	0	0	0	0	0.6591	0	0	0	0
193	3191.22	(Hex)2 (HexNAc)5 (Fuc)2 (3-8NeuAc)1 (GlcA)1 + (Man)3(GlcNAc)2	[145](Hex)2 (HexNAc)5 (Fuc)2 (GlcA)1 + (Man)3(GlcNAc)2_x000D_ [166](Hex)2 (HexNAc)5 (Fuc)1 (3-8NeuAc)1 (GlcA)1 + (Man)3(GlcNAc)2_x000D_ [158](Hex)2 (HexNAc)4 (Fuc)2 (3-8NeuAc)1 (GlcA)1 + (Man)3(GlcNAc)2_x000D_ [223](Hex)2 (HexNAc)5 (Fuc)2 (3-8NeuAc)2 (GlcA)1 + (Man)3(GlcNAc)2	0	0	0	0	3191.26	0	0	0	0	0	0	0	0	0	0	0	0	0	0	0	0	0	0	0	0.558586	0	0	0	0	0	0	0	0	0	0	0	0	0	0	0	0	0.139646	0	0	0	0
194	3192.21	(Hex)3 (HexNAc)3 (Fuc)1 (3-8NeuAc)3 + (Man)3(GlcNAc)2	[147](Hex)3 (HexNAc)3 (Fuc)1 (3-8NeuAc)2 + (Man)3(GlcNAc)2_x000D_ [167](Hex)3 (HexNAc)3 (3-8NeuAc)3 + (Man)3(GlcNAc)2	0	3192.23	3192.23	3192.24	0	3192.3	3192.33	3192.33	3192.34	3192.35	3192.39	3192.39	3192.38	3192.38	3192.4	0	3192.42	3192.42	3192.41	3192.43	0	0.344598	0.311603	0.3227	0	0.486185	0.430066	0.487075	0.479313	0.518765	0.428397	0.438522	0.671893	0.674018	0.639166	0	0.823756	0.668794	0.619903	0.536425	0.244725	0.350832	0.466249	0.496269	0.662219	0.163725
195	3220.24	(Hex)3 (HexNAc)3 (Fuc)1 (3-8NeuAc)2 (6NeuAc)1 + (Man)3(GlcNAc)2	[150](Hex)3 (HexNAc)3 (Fuc)1 (3-8NeuAc)1 (6NeuAc)1 + (Man)3(GlcNAc)2_x000D_ [147](Hex)3 (HexNAc)3 (Fuc)1 (3-8NeuAc)2 + (Man)3(GlcNAc)2_x000D_ [169](Hex)3 (HexNAc)3 (3-8NeuAc)2 (6NeuAc)1 + (Man)3(GlcNAc)2_x000D_ [212](Hex)3 (HexNAc)3 (Fuc)2 (3-8NeuAc)2 (6NeuAc)1 + (Man)3(GlcNAc)2	3220.22	3220.25	3220.27	3220.29	3220.31	3220.34	3220.36	3220.36	3220.37	3220.39	3220.43	3220.43	3220.42	3220.42	3220.44	3220.44	3220.45	3220.46	3220.45	3220.47	2.29666	2.28727	1.95191	1.95394	4.25617	3.74236	3.21027	3.63939	3.67435	3.78614	3.2778	3.37114	5.44397	5.41383	4.96696	4.77462	6.16277	5.47788	5.29579	4.63391	2.12244	3.71205	3.52736	5.14984	5.39259	0.195783
196	3235.24	(Hex)3 (HexNAc)5 (Fuc)1 (6NeuAc)1 (GlcA)1 + (Man)3(GlcNAc)2	[172](Hex)3 (HexNAc)5 (6NeuAc)1 (GlcA)1 + (Man)3(GlcNAc)2	0	0	0	0	0	0	3235.34	0	0	0	0	0	0	0	0	0	0	0	0	0	0	0	0	0	0	0	0.479539	0	0	0	0	0	0	0	0	0	0	0	0	0	0	0.119885	0	0	0	0
197	3235.24	(Hex)2 (HexNAc)3 (Fuc)3 (3-8NeuAc)2 (GlcA)1 + (Man)3(GlcNAc)2	[173](Hex)2 (HexNAc)3 (Fuc)2 (3-8NeuAc)2 (GlcA)1 + (Man)3(GlcNAc)2	0	0	0	0	0	0	3235.34	0	0	0	0	0	0	0	0	0	0	0	0	0	0	0	0	0	0	0	0.479539	0	0	0	0	0	0	0	0	0	0	0	0	0	0	0.119885	0	0	0	0
198	3236.24	(Hex)4 (HexNAc)3 (3-8NeuAc)2 (6NeuAc)1 + (Man)3(GlcNAc)2	[152](Hex)4 (HexNAc)3 (3-8NeuAc)1 (6NeuAc)1 + (Man)3(GlcNAc)2_x000D_ [169](Hex)3 (HexNAc)3 (3-8NeuAc)2 (6NeuAc)1 + (Man)3(GlcNAc)2_x000D_ [217](Hex)4 (HexNAc)4 (3-8NeuAc)2 (6NeuAc)1 + (Man)3(GlcNAc)2	0	3236.23	0	3236.28	3236.29	3236.34	0	3236.35	0	0	0	0	0	0	3236.41	3236.42	3236.44	3236.44	3236.43	3236.45	0	0.378466	0	0.268732	0.579462	0.517205	0	0.480807	0	0	0	0	0	0	0.630743	0.605456	0.81417	0.660414	0.634543	0.597711	0.1618	0.394368	0	0.30905	0.676709	0.192126
199	3236.26	(Hex)3 (HexNAc)3 (Fuc)3 (6NeuAc)2 + (Man)3(GlcNAc)2	[174](Hex)3 (HexNAc)3 (Fuc)2 (6NeuAc)2 + (Man)3(GlcNAc)2_x000D_ [170](Hex)2 (HexNAc)3 (Fuc)3 (6NeuAc)2 + (Man)3(GlcNAc)2_x000D_ [218](Hex)3 (HexNAc)4 (Fuc)3 (6NeuAc)2 + (Man)3(GlcNAc)2	0	3236.23	0	3236.28	3236.29	3236.34	0	3236.35	0	0	0	0	0	0	3236.41	3236.42	3236.44	3236.44	3236.43	3236.45	0	0.378466	0	0.268732	0.579462	0.517205	0	0.480807	0	0	0	0	0	0	0.630743	0.605456	0.81417	0.660414	0.634543	0.597711	0.1618	0.394368	0	0.30905	0.676709	0.192126
200	3248.27	(Hex)3 (HexNAc)3 (Fuc)1 (3-8NeuAc)1 (6NeuAc)2 + (Man)3(GlcNAc)2	[153](Hex)3 (HexNAc)3 (Fuc)1 (6NeuAc)2 + (Man)3(GlcNAc)2_x000D_ [150](Hex)3 (HexNAc)3 (Fuc)1 (3-8NeuAc)1 (6NeuAc)1 + (Man)3(GlcNAc)2_x000D_ [175](Hex)3 (HexNAc)3 (3-8NeuAc)1 (6NeuAc)2 + (Man)3(GlcNAc)2_x000D_ [214](Hex)4 (HexNAc)3 (Fuc)1 (3-8NeuAc)1 (6NeuAc)2 + (Man)3(GlcNAc)2_x000D_ [213](Hex)3 (HexNAc)3 (Fuc)2 (3-8NeuAc)1 (6NeuAc)2 + (Man)3(GlcNAc)2	3248.27	3248.3	3248.32	3248.33	3248.35	3248.39	3248.41	3248.41	3248.42	3248.43	3248.48	3248.48	3248.47	3248.46	3248.48	3248.49	3248.5	3248.51	3248.49	3248.51	15.3154	15.2858	14.1043	13.6432	35.2969	31.652	26.9488	32.0259	32.1041	34.3627	28.62	31.466	50.2037	51.6437	48.4822	47.5713	62.0661	57.4481	56.3497	51.6281	14.5872	31.4809	31.6382	49.4752	56.873	0.845089
201	3264.27	(Hex)4 (HexNAc)3 (3-8NeuAc)1 (6NeuAc)2 + (Man)3(GlcNAc)2	[152](Hex)4 (HexNAc)3 (3-8NeuAc)1 (6NeuAc)1 + (Man)3(GlcNAc)2_x000D_ [175](Hex)3 (HexNAc)3 (3-8NeuAc)1 (6NeuAc)2 + (Man)3(GlcNAc)2_x000D_ [220](Hex)4 (HexNAc)4 (3-8NeuAc)1 (6NeuAc)2 + (Man)3(GlcNAc)2_x000D_ [214](Hex)4 (HexNAc)3 (Fuc)1 (3-8NeuAc)1 (6NeuAc)2 + (Man)3(GlcNAc)2	3264.23	3264.25	3264.28	3264.29	3264.32	3264.35	3264.37	3264.37	3264.37	3264.39	3264.44	3264.44	3264.43	3264.42	3264.45	3264.45	3264.46	3264.47	3264.46	3264.48	1.9576	1.75683	1.55313	1.53332	3.09927	2.68842	2.45774	2.64379	1.03038	1.04702	0.890513	0.907411	3.49562	3.42186	3.16594	3.00083	4.01122	3.33373	3.30407	2.85059	1.70022	2.7223	0.968832	3.27106	3.3749	0.199115
202	3276.3	(Hex)3 (HexNAc)3 (Fuc)1 (6NeuAc)3 + (Man)3(GlcNAc)2	[153](Hex)3 (HexNAc)3 (Fuc)1 (6NeuAc)2 + (Man)3(GlcNAc)2_x000D_ [176](Hex)3 (HexNAc)3 (6NeuAc)3 + (Man)3(GlcNAc)2	3276.29	0	0	0	3276.37	3276.37	3276.42	3276.41	0	3276.41	3276.46	0	3276.5	3276.46	3276.49	3276.5	3276.51	3276.52	3276.5	3276.52	0.786001	0	0	0	1.51251	1.33902	1.08817	1.2762	0	1.33235	1.11578	0	1.62701	1.60934	1.4261	1.40089	1.77191	1.56675	1.46633	1.20959	0.1965	1.30398	0.612032	1.51583	1.50365	0.393
203	3277.26	(Hex)3 (HexNAc)4 (3-8NeuAc)2 (6NeuAc)1 + (Man)3(GlcNAc)2	[169](Hex)3 (HexNAc)3 (3-8NeuAc)2 (6NeuAc)1 + (Man)3(GlcNAc)2_x000D_ [217](Hex)4 (HexNAc)4 (3-8NeuAc)2 (6NeuAc)1 + (Man)3(GlcNAc)2	0	3277.29	3277.32	3277.34	0	0	0	0	3277.42	0	0	3277.48	0	0	0	0	0	0	0	0	0	0.690794	0.655046	0.673972	0	0	0	0	1.01477	0	0	0.975623	0	0	0	0	0	0	0	0	0.504953	0	0.497598	0	0	0.336952
204	3277.29	(Hex)2 (HexNAc)4 (Fuc)3 (6NeuAc)2 + (Man)3(GlcNAc)2	[170](Hex)2 (HexNAc)3 (Fuc)3 (6NeuAc)2 + (Man)3(GlcNAc)2_x000D_ [218](Hex)3 (HexNAc)4 (Fuc)3 (6NeuAc)2 + (Man)3(GlcNAc)2	0	3277.29	3277.32	3277.34	0	0	0	0	3277.42	0	0	3277.48	0	0	0	0	0	0	0	0	0	0.690794	0.655046	0.673972	0	0	0	0	1.01477	0	0	0.975623	0	0	0	0	0	0	0	0	0.504953	0	0.497598	0	0	0.336952
205	3281.25	(Hex)4 (HexNAc)4 (Fuc)1 (3-8NeuAc)1 (6NeuAc)1 + (Man)3(GlcNAc)2	[177](Hex)4 (HexNAc)4 (3-8NeuAc)1 (6NeuAc)1 + (Man)3(GlcNAc)2_x000D_ [227](Hex)4 (HexNAc)4 (Fuc)1 (3-8NeuAc)1 (6NeuAc)2 + (Man)3(GlcNAc)2_x000D_ [226](Hex)4 (HexNAc)4 (Fuc)1 (3-8NeuAc)2 (6NeuAc)1 + (Man)3(GlcNAc)2	0	0	0	0	3281.31	3281.33	3281.37	3281.37	0	3281.39	3281.43	0	3281.42	3281.42	3281.45	3281.45	3281.46	3281.47	3281.45	3281.47	0	0	0	0	0.82927	0.723121	0.61896	0.708032	0	0.699588	0.582677	0	0.92253	0.885841	0.840041	0.790961	0.979571	0.851071	0.828417	0.680797	0	0.719846	0.320566	0.859843	0.834964	0
206	3282.23	(Hex)3 (HexNAc)5 (Fuc)3 (3-8NeuAc)1 + (Man)3(GlcNAc)2		0	0	0	3282.29	0	0	0	0	0	0	0	0	0	0	0	0	0	0	0	0	0	0	0	0.299095	0	0	0	0	0	0	0	0	0	0	0	0	0	0	0	0	0.074774	0	0	0	0	0.149547
207	3290.26	(Hex)2 (HexNAc)5 (3-8NeuAc)3 + (Man)3(GlcNAc)2		0	0	0	0	3290.34	0	0	3290.4	0	0	0	0	0	0	0	0	0	0	0	0	0	0	0	0	0.491202	0	0	0.399442	0	0	0	0	0	0	0	0	0	0	0	0	0	0.222661	0	0	0	0
208	3290.28	(Hex)1 (HexNAc)5 (Fuc)3 (3-8NeuAc)1 (6NeuAc)1 + (Man)3(GlcNAc)2	[180](Hex)1 (HexNAc)5 (Fuc)2 (3-8NeuAc)1 (6NeuAc)1 + (Man)3(GlcNAc)2	0	0	0	0	3290.34	0	0	3290.4	0	0	0	0	0	0	0	0	0	0	0	0	0	0	0	0	0.491202	0	0	0.399442	0	0	0	0	0	0	0	0	0	0	0	0	0	0.222661	0	0	0	0
209	3291.3	(Hex)2 (HexNAc)3 (Fuc)3 (6NeuAc)2 (GlcA)1 + (Man)3(GlcNAc)2	[170](Hex)2 (HexNAc)3 (Fuc)3 (6NeuAc)2 + (Man)3(GlcNAc)2_x000D_ [181](Hex)2 (HexNAc)3 (Fuc)2 (6NeuAc)2 (GlcA)1 + (Man)3(GlcNAc)2	0	0	0	0	0	0	3291.38	0	0	0	0	0	0	0	0	0	0	0	0	0	0	0	0	0	0	0	0.332777	0	0	0	0	0	0	0	0	0	0	0	0	0	0	0.083194	0	0	0	0
210	3305.29	(Hex)3 (HexNAc)4 (3-8NeuAc)1 (6NeuAc)2 + (Man)3(GlcNAc)2	[179](Hex)2 (HexNAc)4 (3-8NeuAc)1 (6NeuAc)2 + (Man)3(GlcNAc)2_x000D_ [175](Hex)3 (HexNAc)3 (3-8NeuAc)1 (6NeuAc)2 + (Man)3(GlcNAc)2_x000D_ [220](Hex)4 (HexNAc)4 (3-8NeuAc)1 (6NeuAc)2 + (Man)3(GlcNAc)2	0	0	0	0	3305.33	0	0	0	0	0	0	0	0	0	0	0	0	0	0	0	0	0	0	0	0.422407	0	0	0	0	0	0	0	0	0	0	0	0	0	0	0	0	0.105602	0	0	0	0
211	3366.3	(Hex)4 (HexNAc)5 (6NeuAc)2 + (Man)3(GlcNAc)2	[191](Hex)4 (HexNAc)4 (6NeuAc)2 + (Man)3(GlcNAc)2	3366.3	3366.32	3366.33	3366.35	3366.37	3366.4	3366.42	3366.41	3366.42	3366.45	3366.49	3366.49	3366.48	3366.47	3366.49	3366.51	3366.51	3366.52	3366.5	3366.53	0.369567	0.381945	0.336827	0.310431	0.573769	0.515526	0.4414	0.477192	0.446477	0.481817	0.377199	0.448651	0.598328	0.631813	0.577267	0.52548	0.667036	0.552175	0.544542	0.467287	0.349693	0.501972	0.438536	0.583222	0.55776	0.032364
212	3366.3	(Hex)3 (HexNAc)3 (Fuc)2 (3-8NeuAc)2 (6NeuAc)1 + (Man)3(GlcNAc)2	[195](Hex)3 (HexNAc)3 (Fuc)1 (3-8NeuAc)2 (6NeuAc)1 + (Man)3(GlcNAc)2	3366.3	3366.32	3366.33	3366.35	3366.37	3366.4	3366.42	3366.41	3366.42	3366.45	3366.49	3366.49	3366.48	3366.47	3366.49	3366.51	3366.51	3366.52	3366.5	3366.53	0.369567	0.381945	0.336827	0.310431	0.573769	0.515526	0.4414	0.477192	0.446477	0.481817	0.377199	0.448651	0.598328	0.631813	0.577267	0.52548	0.667036	0.552175	0.544542	0.467287	0.349693	0.501972	0.438536	0.583222	0.55776	0.032364
213	3394.33	(Hex)3 (HexNAc)3 (Fuc)2 (3-8NeuAc)1 (6NeuAc)2 + (Man)3(GlcNAc)2	[174](Hex)3 (HexNAc)3 (Fuc)2 (6NeuAc)2 + (Man)3(GlcNAc)2_x000D_ [200](Hex)3 (HexNAc)3 (Fuc)1 (3-8NeuAc)1 (6NeuAc)2 + (Man)3(GlcNAc)2	3394.32	3394.34	3394.35	3394.36	3394.4	3394.43	3394.45	3394.45	3394.48	3394.47	3394.53	3394.51	3394.51	3394.5	3394.51	3394.5	3394.53	3394.54	3394.53	3394.56	0.38602	0.411546	0.305055	0.331147	0.60897	0.505655	0.46165	0.506096	0.506863	0.509734	0.448329	0.473373	0.622348	0.612784	0.568946	0.572429	0.678787	0.582036	0.563187	0.489625	0.358442	0.520593	0.484575	0.594127	0.578409	0.048907
214	3410.33	(Hex)4 (HexNAc)3 (Fuc)1 (3-8NeuAc)1 (6NeuAc)2 + (Man)3(GlcNAc)2	[201](Hex)4 (HexNAc)3 (3-8NeuAc)1 (6NeuAc)2 + (Man)3(GlcNAc)2_x000D_ [200](Hex)3 (HexNAc)3 (Fuc)1 (3-8NeuAc)1 (6NeuAc)2 + (Man)3(GlcNAc)2_x000D_ [227](Hex)4 (HexNAc)4 (Fuc)1 (3-8NeuAc)1 (6NeuAc)2 + (Man)3(GlcNAc)2	0	0	0	0	0	0	3410.38	0	0	0	0	0	0	0	0	0	0	0	0	0	0	0	0	0	0	0	0.298429	0	0	0	0	0	0	0	0	0	0	0	0	0	0	0.074607	0	0	0	0
215	3411.28	(Hex)4 (HexNAc)4 (3-8NeuAc)3 + (Man)3(GlcNAc)2	[228](Hex)4 (HexNAc)4 (3-8NeuAc)3 (6NeuAc)1 + (Man)3(GlcNAc)2	0	0	0	0	3411.41	3411.42	0	0	0	0	0	0	0	0	0	0	0	0	0	0	0	0	0	0	0.381438	0.306491	0	0	0	0	0	0	0	0	0	0	0	0	0	0	0	0.171982	0	0	0	0
216	3411.31	(Hex)3 (HexNAc)4 (Fuc)3 (3-8NeuAc)1 (6NeuAc)1 + (Man)3(GlcNAc)2	[229](Hex)3 (HexNAc)4 (Fuc)3 (3-8NeuAc)1 (6NeuAc)2 + (Man)3(GlcNAc)2	0	0	0	0	3411.41	3411.42	0	0	0	0	0	0	0	0	0	0	0	0	0	0	0	0	0	0	0.381438	0.306491	0	0	0	0	0	0	0	0	0	0	0	0	0	0	0	0.171982	0	0	0	0
217	3439.32	(Hex)4 (HexNAc)4 (3-8NeuAc)2 (6NeuAc)1 + (Man)3(GlcNAc)2	[177](Hex)4 (HexNAc)4 (3-8NeuAc)1 (6NeuAc)1 + (Man)3(GlcNAc)2_x000D_ [203](Hex)3 (HexNAc)4 (3-8NeuAc)2 (6NeuAc)1 + (Man)3(GlcNAc)2_x000D_ [198](Hex)4 (HexNAc)3 (3-8NeuAc)2 (6NeuAc)1 + (Man)3(GlcNAc)2_x000D_ [226](Hex)4 (HexNAc)4 (Fuc)1 (3-8NeuAc)2 (6NeuAc)1 + (Man)3(GlcNAc)2_x000D_ [231](Hex)4 (HexNAc)4 (3-8NeuAc)2 (6NeuAc)2 + (Man)3(GlcNAc)2_x000D_ [228](Hex)4 (HexNAc)4 (3-8NeuAc)3 (6NeuAc)1 + (…	3439.31	3439.33	3439.35	3439.36	3439.39	3439.43	3439.45	3439.45	3439.46	3439.47	3439.52	3439.52	3439.52	3439.51	3439.53	3439.53	3439.55	3439.55	3439.54	3439.56	2.09654	2.0417	1.8033	1.70851	4.0056	3.43498	2.79397	3.37391	2.96364	3.18571	2.58829	2.76688	4.18341	4.24747	3.83616	3.67205	4.57372	3.92087	3.82938	3.24262	1.91251	3.40211	2.87613	3.98477	3.89165	0.186281
218	3439.34	(Hex)3 (HexNAc)4 (Fuc)3 (6NeuAc)2 + (Man)3(GlcNAc)2	[204](Hex)2 (HexNAc)4 (Fuc)3 (6NeuAc)2 + (Man)3(GlcNAc)2_x000D_ [199](Hex)3 (HexNAc)3 (Fuc)3 (6NeuAc)2 + (Man)3(GlcNAc)2_x000D_ [232](Hex)3 (HexNAc)4 (Fuc)3 (6NeuAc)3 + (Man)3(GlcNAc)2_x000D_ [229](Hex)3 (HexNAc)4 (Fuc)3 (3-8NeuAc)1 (6NeuAc)2 + (Man)3(GlcNAc)2	3439.31	3439.33	3439.35	3439.36	3439.39	3439.43	3439.45	3439.45	3439.46	3439.47	3439.52	3439.52	3439.52	3439.51	3439.53	3439.53	3439.55	3439.55	3439.54	3439.56	2.09654	2.0417	1.8033	1.70851	4.0056	3.43498	2.79397	3.37391	2.96364	3.18571	2.58829	2.76688	4.18341	4.24747	3.83616	3.67205	4.57372	3.92087	3.82938	3.24262	1.91251	3.40211	2.87613	3.98477	3.89165	0.186281
219	3455.34	(Hex)4 (HexNAc)4 (Fuc)2 (6NeuAc)2 + (Man)3(GlcNAc)2	[233](Hex)4 (HexNAc)4 (Fuc)2 (6NeuAc)3 + (Man)3(GlcNAc)2_x000D_ [230](Hex)4 (HexNAc)4 (Fuc)2 (3-8NeuAc)1 (6NeuAc)2 + (Man)3(GlcNAc)2	3455.28	0	3455.32	3455.34	3455.36	3455.39	3455.42	3455.46	0	0	0	0	0	0	0	0	0	0	0	0	0.361655	0	0.277703	0.225071	0.406129	0.353904	0.305794	0.333352	0	0	0	0	0	0	0	0	0	0	0	0	0.216107	0.349795	0	0	0	0.154662
220	3467.35	(Hex)4 (HexNAc)4 (3-8NeuAc)1 (6NeuAc)2 + (Man)3(GlcNAc)2	[191](Hex)4 (HexNAc)4 (6NeuAc)2 + (Man)3(GlcNAc)2_x000D_ [177](Hex)4 (HexNAc)4 (3-8NeuAc)1 (6NeuAc)1 + (Man)3(GlcNAc)2_x000D_ [210](Hex)3 (HexNAc)4 (3-8NeuAc)1 (6NeuAc)2 + (Man)3(GlcNAc)2_x000D_ [201](Hex)4 (HexNAc)3 (3-8NeuAc)1 (6NeuAc)2 + (Man)3(GlcNAc)2_x000D_ [227](Hex)4 (HexNAc)4 (Fuc)1 (3-8NeuAc)1 (6NeuAc)2 + (Man)3(GlcNAc)2_x000D_ [234](Hex)4 (HexNAc)4 (3-8NeuAc)1 (6NeuAc)3 + (Man)3(GlcNAc…	3467.33	0	3467.38	3467.38	3467.42	3467.45	3467.48	3467.48	3467.49	3467.5	3467.55	3467.56	3467.55	3467.54	3467.56	3467.56	3467.58	3467.58	3467.57	3467.59	1.5045	0	1.32374	1.3129	2.84322	2.42704	1.92012	2.34239	2.09576	2.24101	1.84325	1.94651	2.84209	2.87585	2.60912	2.49696	3.11572	2.62156	2.5916	2.1689	1.03529	2.38319	2.03163	2.706	2.62444	0.695763
221	3468.33	(Hex)3 (HexNAc)5 (Fuc)2 (3-8NeuAc)1 (6NeuAc)1 + (Man)3(GlcNAc)2		0	3468.39	0	0	0	0	0	0	0	0	0	0	0	0	0	0	0	0	0	0	0	1.12799	0	0	0	0	0	0	0	0	0	0	0	0	0	0	0	0	0	0	0.281997	0	0	0	0	0.563993
222	3482.35	(Hex)3 (HexNAc)4 (Fuc)2 (3-8NeuAc)1 (6NeuAc)1 (GlcA)1 + (Man)3(GlcNAc)2	[192](Hex)3 (HexNAc)4 (Fuc)2 (6NeuAc)1 (GlcA)1 + (Man)3(GlcNAc)2	0	0	0	3482.38	0	3482.4	0	0	0	0	0	0	0	0	0	0	0	0	0	0	0	0	0	0.343846	0	0.551632	0	0	0	0	0	0	0	0	0	0	0	0	0	0	0.085961	0.137908	0	0	0	0.171923
223	3495.34	(Hex)2 (HexNAc)5 (Fuc)2 (3-8NeuAc)2 (GlcA)1 + (Man)3(GlcNAc)2	[193](Hex)2 (HexNAc)5 (Fuc)2 (3-8NeuAc)1 (GlcA)1 + (Man)3(GlcNAc)2	3495.35	0	0	3495.44	3495.44	3495.48	3495.49	0	0	0	3495.54	0	3495.56	3495.55	3495.57	3495.55	3495.59	3495.61	0	3495.61	0.335661	0	0	0.304275	0.526538	0.487231	0.370775	0	0	0	0.352939	0	0.487094	0.488076	0.429355	0.446688	0.538796	0.406044	0	0.358074	0.159984	0.346136	0.088235	0.462803	0.325729	0.185177
224	3495.38	(Hex)4 (HexNAc)4 (6NeuAc)3 + (Man)3(GlcNAc)2	[191](Hex)4 (HexNAc)4 (6NeuAc)2 + (Man)3(GlcNAc)2_x000D_ [234](Hex)4 (HexNAc)4 (3-8NeuAc)1 (6NeuAc)3 + (Man)3(GlcNAc)2	3495.35	0	0	3495.44	3495.44	3495.48	3495.49	0	0	0	3495.54	0	3495.56	3495.55	3495.57	3495.55	3495.59	3495.61	0	3495.61	0.335661	0	0	0.304275	0.526538	0.487231	0.370775	0	0	0	0.352939	0	0.487094	0.488076	0.429355	0.446688	0.538796	0.406044	0	0.358074	0.159984	0.346136	0.088235	0.462803	0.325729	0.185177
225	3496.36	(Hex)3 (HexNAc)5 (Fuc)2 (6NeuAc)2 + (Man)3(GlcNAc)2		0	3496.38	3496.45	0	0	0	0	3496.53	0	3496.52	0	0	0	0	0	0	0	0	3496.59	0	0	0.297483	0.312372	0	0	0	0	0.359956	0	0.356448	0	0	0	0	0	0	0	0	0.362331	0	0.152464	0.089989	0.089112	0	0.090583	0.176155
226	3585.37	(Hex)4 (HexNAc)4 (Fuc)1 (3-8NeuAc)2 (6NeuAc)1 + (Man)3(GlcNAc)2	[205](Hex)4 (HexNAc)4 (Fuc)1 (3-8NeuAc)1 (6NeuAc)1 + (Man)3(GlcNAc)2_x000D_ [217](Hex)4 (HexNAc)4 (3-8NeuAc)2 (6NeuAc)1 + (Man)3(GlcNAc)2_x000D_ [239](Hex)4 (HexNAc)4 (Fuc)1 (3-8NeuAc)2 (6NeuAc)2 + (Man)3(GlcNAc)2_x000D_ [238](Hex)4 (HexNAc)4 (Fuc)1 (3-8NeuAc)3 (6NeuAc)1 + (Man)3(GlcNAc)2	3585.38	3585.39	3585.42	3585.43	3585.44	3585.48	3585.5	3585.5	3585.5	3585.5	3585.55	3585.58	3585.57	3585.56	3585.59	3585.59	3585.61	3585.61	3585.6	3585.62	0.678629	0.622166	0.55948	0.527632	1.03471	0.859281	0.677381	0.825876	0.710506	0.792483	0.639535	0.656516	0.947186	0.971225	0.884293	0.820438	0.968554	0.788025	0.817518	0.669691	0.596977	0.849313	0.69976	0.905786	0.810947	0.067122
227	3613.41	(Hex)4 (HexNAc)4 (Fuc)1 (3-8NeuAc)1 (6NeuAc)2 + (Man)3(GlcNAc)2	[205](Hex)4 (HexNAc)4 (Fuc)1 (3-8NeuAc)1 (6NeuAc)1 + (Man)3(GlcNAc)2_x000D_ [220](Hex)4 (HexNAc)4 (3-8NeuAc)1 (6NeuAc)2 + (Man)3(GlcNAc)2_x000D_ [214](Hex)4 (HexNAc)3 (Fuc)1 (3-8NeuAc)1 (6NeuAc)2 + (Man)3(GlcNAc)2_x000D_ [230](Hex)4 (HexNAc)4 (Fuc)2 (3-8NeuAc)1 (6NeuAc)2 + (Man)3(GlcNAc)2_x000D_ [240](Hex)4 (HexNAc)4 (Fuc)1 (3-8NeuAc)1 (6NeuAc)3 + (Man)3(GlcNAc)2_x000D_ [239](Hex)4 (HexNAc)4 (Fuc…	3613.39	3613.41	3613.42	3613.45	3613.47	3613.51	3613.51	3613.52	3613.54	3613.56	3613.61	3613.59	3613.6	3613.59	3613.6	3613.63	3613.62	3613.63	3613.62	3613.65	0.403239	0.419498	0.348467	0.341133	0.589513	0.513169	0.395314	0.487308	0.430981	0.471261	0.393876	0.415301	0.543436	0.546716	0.484317	0.480491	0.568412	0.462046	0.471927	0.388676	0.378084	0.496326	0.427855	0.51374	0.472765	0.039117
228	3743.44	(Hex)4 (HexNAc)4 (3-8NeuAc)3 (6NeuAc)1 + (Man)3(GlcNAc)2	[217](Hex)4 (HexNAc)4 (3-8NeuAc)2 (6NeuAc)1 + (Man)3(GlcNAc)2_x000D_ [215](Hex)4 (HexNAc)4 (3-8NeuAc)3 + (Man)3(GlcNAc)2_x000D_ [238](Hex)4 (HexNAc)4 (Fuc)1 (3-8NeuAc)3 (6NeuAc)1 + (Man)3(GlcNAc)2	3743.46	3743.48	3743.5	3743.51	3743.53	3743.56	3743.59	3743.59	3743.6	3743.61	3743.66	3743.67	3743.66	3743.65	3743.68	3743.69	3743.7	3743.71	3743.69	3743.71	1.50377	1.45353	1.26825	1.2106	2.47307	2.07011	1.5597	2.01111	1.62013	1.79219	1.37533	1.51009	2.20633	2.25811	2.03612	1.92641	2.42702	1.96792	2.00011	1.57072	1.35904	2.0285	1.57444	2.10674	1.99144	0.141603
229	3743.47	(Hex)3 (HexNAc)4 (Fuc)3 (3-8NeuAc)1 (6NeuAc)2 + (Man)3(GlcNAc)2	[218](Hex)3 (HexNAc)4 (Fuc)3 (6NeuAc)2 + (Man)3(GlcNAc)2_x000D_ [216](Hex)3 (HexNAc)4 (Fuc)3 (3-8NeuAc)1 (6NeuAc)1 + (Man)3(GlcNAc)2	3743.46	3743.48	3743.5	3743.51	3743.53	3743.56	3743.59	3743.59	3743.6	3743.61	3743.66	3743.67	3743.66	3743.65	3743.68	3743.69	3743.7	3743.71	3743.69	3743.71	1.50377	1.45353	1.26825	1.2106	2.47307	2.07011	1.5597	2.01111	1.62013	1.79219	1.37533	1.51009	2.20633	2.25811	2.03612	1.92641	2.42702	1.96792	2.00011	1.57072	1.35904	2.0285	1.57444	2.10674	1.99144	0.141603
230	3759.46	(Hex)4 (HexNAc)4 (Fuc)2 (3-8NeuAc)1 (6NeuAc)2 + (Man)3(GlcNAc)2	[219](Hex)4 (HexNAc)4 (Fuc)2 (6NeuAc)2 + (Man)3(GlcNAc)2_x000D_ [227](Hex)4 (HexNAc)4 (Fuc)1 (3-8NeuAc)1 (6NeuAc)2 + (Man)3(GlcNAc)2_x000D_ [242](Hex)4 (HexNAc)4 (Fuc)2 (3-8NeuAc)2 (6NeuAc)2 + (Man)3(GlcNAc)2	3759.45	3759.44	3759.48	3759.47	3759.5	3759.55	3759.57	3759.56	0	0	0	0	0	0	0	0	0	0	0	0	0.265506	0.230973	0.22885	0.202006	0.324263	0.277529	0.234447	0.252014	0	0	0	0	0	0	0	0	0	0	0	0	0.231834	0.272063	0	0	0	0.026033
231	3771.47	(Hex)4 (HexNAc)4 (3-8NeuAc)2 (6NeuAc)2 + (Man)3(GlcNAc)2	[220](Hex)4 (HexNAc)4 (3-8NeuAc)1 (6NeuAc)2 + (Man)3(GlcNAc)2_x000D_ [217](Hex)4 (HexNAc)4 (3-8NeuAc)2 (6NeuAc)1 + (Man)3(GlcNAc)2_x000D_ [239](Hex)4 (HexNAc)4 (Fuc)1 (3-8NeuAc)2 (6NeuAc)2 + (Man)3(GlcNAc)2	3771.49	3771.51	3771.52	3771.52	3771.56	3771.59	3771.62	3771.62	3771.63	3771.65	3771.7	3771.7	3771.69	3771.69	3771.72	3771.72	3771.73	3771.74	3771.73	3771.75	1.68796	1.64393	1.44621	1.35485	2.8554	2.36942	1.77299	2.34633	1.82159	2.02463	1.55292	1.7208	2.56247	2.61246	2.34623	2.23378	2.8353	2.31112	2.32233	1.82105	1.53324	2.33603	1.77999	2.43874	2.32245	0.158734
232	3771.5	(Hex)3 (HexNAc)4 (Fuc)3 (6NeuAc)3 + (Man)3(GlcNAc)2	[218](Hex)3 (HexNAc)4 (Fuc)3 (6NeuAc)2 + (Man)3(GlcNAc)2	3771.49	3771.51	3771.52	3771.52	3771.56	3771.59	3771.62	3771.62	3771.63	3771.65	3771.7	3771.7	3771.69	3771.69	3771.72	3771.72	3771.73	3771.74	3771.73	3771.75	1.68796	1.64393	1.44621	1.35485	2.8554	2.36942	1.77299	2.34633	1.82159	2.02463	1.55292	1.7208	2.56247	2.61246	2.34623	2.23378	2.8353	2.31112	2.32233	1.82105	1.53324	2.33603	1.77999	2.43874	2.32245	0.158734
233	3787.49	(Hex)4 (HexNAc)4 (Fuc)2 (6NeuAc)3 + (Man)3(GlcNAc)2	[219](Hex)4 (HexNAc)4 (Fuc)2 (6NeuAc)2 + (Man)3(GlcNAc)2	3787.48	3787.5	3787.5	3787.51	3787.54	3787.57	3787.61	3787.6	0	0	0	0	3787.63	0	0	3787.68	3787.7	0	0	0	0.241514	0.234226	0.204782	0.209006	0.313479	0.267649	0.222288	0.259776	0	0	0	0	0.26989	0	0	0.239613	0.275339	0	0	0	0.222382	0.265798	0	0.127376	0.068835	0.018211
234	3799.51	(Hex)4 (HexNAc)4 (3-8NeuAc)1 (6NeuAc)3 + (Man)3(GlcNAc)2	[224](Hex)4 (HexNAc)4 (6NeuAc)3 + (Man)3(GlcNAc)2_x000D_ [220](Hex)4 (HexNAc)4 (3-8NeuAc)1 (6NeuAc)2 + (Man)3(GlcNAc)2_x000D_ [240](Hex)4 (HexNAc)4 (Fuc)1 (3-8NeuAc)1 (6NeuAc)3 + (Man)3(GlcNAc)2	3799.49	3799.51	3799.54	3799.55	3799.59	3799.62	3799.65	3799.65	3799.67	3799.68	3799.73	3799.74	3799.72	3799.7	3799.74	3799.75	3799.75	3799.76	3799.74	3799.77	0.584109	0.549585	0.501255	0.489415	0.825163	0.707103	0.526032	0.661261	0.554075	0.603775	0.478396	0.510564	0.671499	0.686246	0.630178	0.605009	0.724079	0.58408	0.600075	0.468814	0.531091	0.67989	0.536702	0.648233	0.594262	0.043894
235	3804.45	(Hex)5 (HexNAc)5 (3-8NeuAc)2 (6NeuAc)1 + (Man)3(GlcNAc)2	[245](Hex)5 (HexNAc)5 (3-8NeuAc)2 (6NeuAc)2 + (Man)3(GlcNAc)2_x000D_ [243](Hex)5 (HexNAc)5 (3-8NeuAc)3 (6NeuAc)1 + (Man)3(GlcNAc)2	0	0	0	0	3804.55	0	0	0	0	0	0	0	0	0	0	0	0	0	0	0	0	0	0	0	0.227513	0	0	0	0	0	0	0	0	0	0	0	0	0	0	0	0	0.056878	0	0	0	0
236	3804.47	(Hex)4 (HexNAc)5 (Fuc)3 (6NeuAc)2 + (Man)3(GlcNAc)2	[246](Hex)4 (HexNAc)5 (Fuc)3 (6NeuAc)3 + (Man)3(GlcNAc)2_x000D_ [244](Hex)4 (HexNAc)5 (Fuc)3 (3-8NeuAc)1 (6NeuAc)2 + (Man)3(GlcNAc)2	0	0	0	0	3804.55	0	0	0	0	0	0	0	0	0	0	0	0	0	0	0	0	0	0	0	0.227513	0	0	0	0	0	0	0	0	0	0	0	0	0	0	0	0	0.056878	0	0	0	0
237	3832.48	(Hex)5 (HexNAc)5 (3-8NeuAc)1 (6NeuAc)2 + (Man)3(GlcNAc)2	[247](Hex)5 (HexNAc)5 (3-8NeuAc)1 (6NeuAc)3 + (Man)3(GlcNAc)2_x000D_ [245](Hex)5 (HexNAc)5 (3-8NeuAc)2 (6NeuAc)2 + (Man)3(GlcNAc)2	0	0	0	0	3832.57	3832.64	3832.64	3832.66	0	3832.67	0	0	0	0	0	0	0	0	0	0	0	0	0	0	0.248323	0.213966	0.164471	0.221183	0	0.197921	0	0	0	0	0	0	0	0	0	0	0	0.211986	0.04948	0	0	0
238	3889.5	(Hex)4 (HexNAc)4 (Fuc)1 (3-8NeuAc)3 (6NeuAc)1 + (Man)3(GlcNAc)2	[226](Hex)4 (HexNAc)4 (Fuc)1 (3-8NeuAc)2 (6NeuAc)1 + (Man)3(GlcNAc)2_x000D_ [228](Hex)4 (HexNAc)4 (3-8NeuAc)3 (6NeuAc)1 + (Man)3(GlcNAc)2_x000D_ [241](Hex)4 (HexNAc)4 (Fuc)2 (3-8NeuAc)3 (6NeuAc)1 + (Man)3(GlcNAc)2	3889.53	3889.53	3889.56	3889.56	3889.6	3889.63	3889.66	3889.67	3889.67	3889.69	3889.74	3889.75	3889.73	3889.72	3889.75	3889.74	3889.76	3889.76	3889.75	3889.78	0.576251	0.548181	0.459638	0.429676	0.774567	0.640229	0.488815	0.631758	0.488007	0.573928	0.437575	0.464744	0.646559	0.65474	0.586992	0.565683	0.680135	0.54362	0.563433	0.438811	0.503437	0.633842	0.491063	0.613494	0.5565	0.069912
239	3917.53	(Hex)4 (HexNAc)4 (Fuc)1 (3-8NeuAc)2 (6NeuAc)2 + (Man)3(GlcNAc)2	[227](Hex)4 (HexNAc)4 (Fuc)1 (3-8NeuAc)1 (6NeuAc)2 + (Man)3(GlcNAc)2_x000D_ [226](Hex)4 (HexNAc)4 (Fuc)1 (3-8NeuAc)2 (6NeuAc)1 + (Man)3(GlcNAc)2_x000D_ [231](Hex)4 (HexNAc)4 (3-8NeuAc)2 (6NeuAc)2 + (Man)3(GlcNAc)2_x000D_ [242](Hex)4 (HexNAc)4 (Fuc)2 (3-8NeuAc)2 (6NeuAc)2 + (Man)3(GlcNAc)2	3917.55	3917.56	3917.58	3917.6	3917.64	3917.67	3917.69	3917.7	3917.71	3917.71	3917.78	3917.78	3917.74	3917.74	3917.79	3917.78	3917.78	3917.8	3917.78	3917.8	0.581955	0.561309	0.504368	0.461864	0.834583	0.688931	0.516616	0.68507	0.524951	0.591355	0.448968	0.488554	0.687963	0.691365	0.62651	0.602357	0.759125	0.578354	0.598368	0.477582	0.527374	0.6813	0.513457	0.652049	0.603357	0.054624
240	3945.56	(Hex)4 (HexNAc)4 (Fuc)1 (3-8NeuAc)1 (6NeuAc)3 + (Man)3(GlcNAc)2	[227](Hex)4 (HexNAc)4 (Fuc)1 (3-8NeuAc)1 (6NeuAc)2 + (Man)3(GlcNAc)2_x000D_ [234](Hex)4 (HexNAc)4 (3-8NeuAc)1 (6NeuAc)3 + (Man)3(GlcNAc)2	0	0	0	0	3945.64	0	0	0	0	0	0	0	0	0	0	0	0	0	0	0	0	0	0	0	0.198917	0	0	0	0	0	0	0	0	0	0	0	0	0	0	0	0	0.049729	0	0	0	0
241	4035.56	(Hex)4 (HexNAc)4 (Fuc)2 (3-8NeuAc)3 (6NeuAc)1 + (Man)3(GlcNAc)2	[238](Hex)4 (HexNAc)4 (Fuc)1 (3-8NeuAc)3 (6NeuAc)1 + (Man)3(GlcNAc)2	4035.57	4035.59	0	4035.63	4035.66	4035.69	4035.75	4035.72	0	0	0	0	0	0	0	0	0	0	0	0	0.193634	0.172178	0	0.151103	0.225475	0.174728	0.142704	0.172871	0	0	0	0	0	0	0	0	0	0	0	0	0.129229	0.178945	0	0	0	0.087885
242	4063.59	(Hex)4 (HexNAc)4 (Fuc)2 (3-8NeuAc)2 (6NeuAc)2 + (Man)3(GlcNAc)2	[230](Hex)4 (HexNAc)4 (Fuc)2 (3-8NeuAc)1 (6NeuAc)2 + (Man)3(GlcNAc)2_x000D_ [239](Hex)4 (HexNAc)4 (Fuc)1 (3-8NeuAc)2 (6NeuAc)2 + (Man)3(GlcNAc)2	0	0	0	0	4063.71	0	0	0	0	0	0	0	0	0	0	0	0	0	0	0	0	0	0	0	0.137221	0	0	0	0	0	0	0	0	0	0	0	0	0	0	0	0	0.034305	0	0	0	0
243	4108.57	(Hex)5 (HexNAc)5 (3-8NeuAc)3 (6NeuAc)1 + (Man)3(GlcNAc)2	[235](Hex)5 (HexNAc)5 (3-8NeuAc)2 (6NeuAc)1 + (Man)3(GlcNAc)2	0	0	0	0	4108.69	0	0	4108.75	0	0	0	0	0	0	0	0	0	0	0	0	0	0	0	0	0.138568	0	0	0.115749	0	0	0	0	0	0	0	0	0	0	0	0	0	0.063579	0	0	0	0
244	4108.6	(Hex)4 (HexNAc)5 (Fuc)3 (3-8NeuAc)1 (6NeuAc)2 + (Man)3(GlcNAc)2	[236](Hex)4 (HexNAc)5 (Fuc)3 (6NeuAc)2 + (Man)3(GlcNAc)2	0	0	0	0	4108.69	0	0	4108.75	0	0	0	0	0	0	0	0	0	0	0	0	0	0	0	0	0.138568	0	0	0.115749	0	0	0	0	0	0	0	0	0	0	0	0	0	0.063579	0	0	0	0
245	4136.61	(Hex)5 (HexNAc)5 (3-8NeuAc)2 (6NeuAc)2 + (Man)3(GlcNAc)2	[237](Hex)5 (HexNAc)5 (3-8NeuAc)1 (6NeuAc)2 + (Man)3(GlcNAc)2_x000D_ [235](Hex)5 (HexNAc)5 (3-8NeuAc)2 (6NeuAc)1 + (Man)3(GlcNAc)2	4136.63	0	0	0	4136.74	4136.76	4136.79	4136.79	0	4136.82	0	0	0	0	0	0	0	0	0	0	0.208836	0	0	0	0.219998	0.178698	0.150334	0.166379	0	0.157251	0	0	0	0	0	0	0	0	0	0	0.052209	0.178852	0.039313	0	0	0.104418
246	4136.63	(Hex)4 (HexNAc)5 (Fuc)3 (6NeuAc)3 + (Man)3(GlcNAc)2	[236](Hex)4 (HexNAc)5 (Fuc)3 (6NeuAc)2 + (Man)3(GlcNAc)2	4136.63	0	0	0	4136.74	4136.76	4136.79	4136.79	0	4136.82	0	0	0	0	0	0	0	0	0	0	0.208836	0	0	0	0.219998	0.178698	0.150334	0.166379	0	0.157251	0	0	0	0	0	0	0	0	0	0	0.052209	0.178852	0.039313	0	0	0.104418
247	4164.64	(Hex)5 (HexNAc)5 (3-8NeuAc)1 (6NeuAc)3 + (Man)3(GlcNAc)2	[237](Hex)5 (HexNAc)5 (3-8NeuAc)1 (6NeuAc)2 + (Man)3(GlcNAc)2	0	0	0	0	4164.72	0	0	0	0	0	0	0	0	0	0	0	0	0	0	0	0	0	0	0	0.13445	0	0	0	0	0	0	0	0	0	0	0	0	0	0	0	0	0.033613	0	0	0	0
[truncated: 10 more columns]
